# Supplementary material for: Genome-Wide Identification and Transcriptional Expression Profiles of Transcription Factor WRKY in Common Walnut (Juglans regia L.)
Source: MDPI journal article supplement (doi:10.3390/genes12091444), 2021-09-19
Supplement: s1 [file s1]

## Supplementary materials

### Figures:

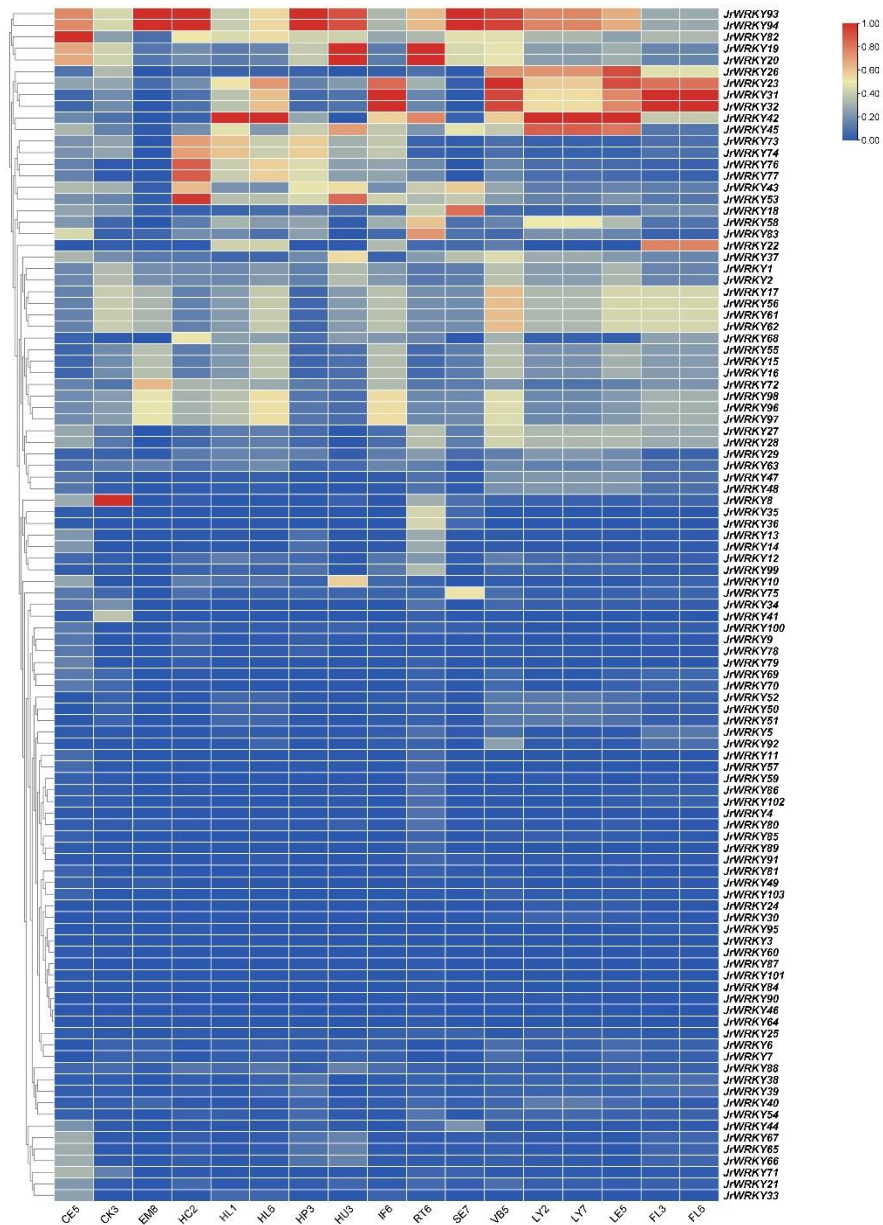

**Figure S1. Expression profiles of the walnut WRKY genes among 17 tissues.** The transcriptome information was seen in (Table S1). The expression level shows from blue to red represent low to high as shown in the right ruler.

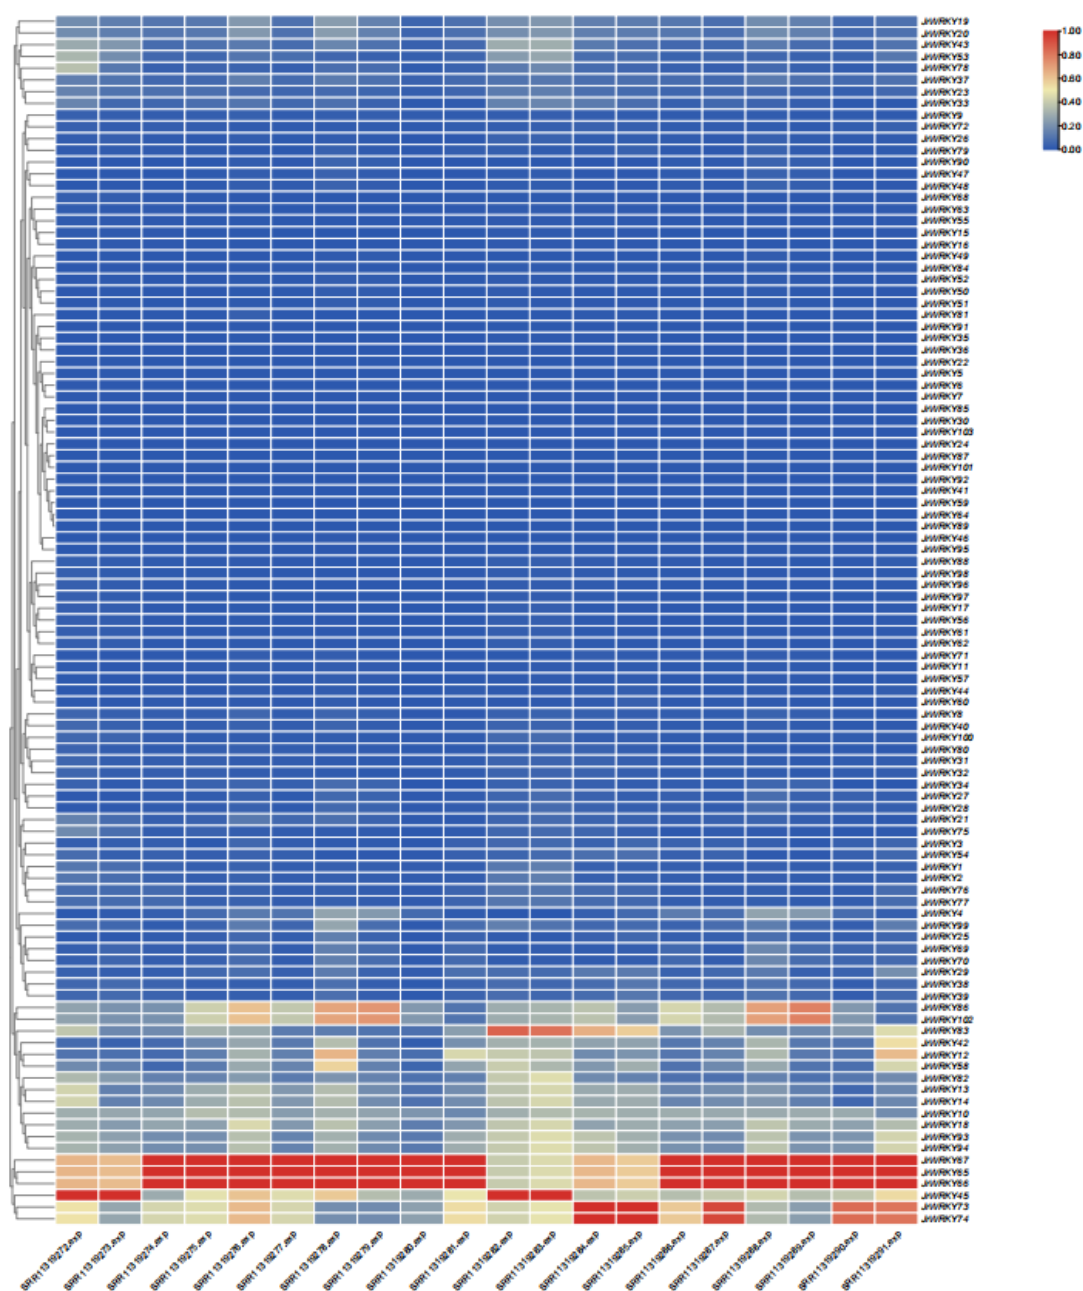

**Figure S2.** Expression profiles of the walnut *WRKY* genes between anthracnose-resistant F26 and anthracnose-susceptible F423 were used in this study. A total of 10 anthracnose-resistant walnuts and 10 anthracnose-susceptible F423 walnuts (Table S1). The expression level shows from blue to red represent low to high as shown in the right ruler.
