# Supplementary material for: Genome-Wide Identification and Transcriptional Expression Profiles of Transcription Factor WRKY in Common Walnut (Juglans regia L.)
Source: Genes (Basel). 2021 Sep 19;12(9):1444. doi: 10.3390/genes12091444 (PMC8466090; doi:10.3390/genes12091444)
Supplement: Supplementary file 1 [file genes-12-01444-s001.zip]

Archive with 17 entries (17 files):
- Supplementary Figures.pdf
- TableS1.xlsx
- TableS10.xlsx
- TableS11.xlsx
- TableS12.xlsx
- TableS13.xlsx
- TableS14.xlsx
- TableS15.xlsx
- TableS16.xlsx
- TableS2.xlsx
- TableS3.xlsx
- TableS4.xlsx
- TableS5.xlsx
- TableS6.xlsx
- TableS7.xlsx
- TableS8.xlsx
- TableS9.xlsx
