# Supplementary material for: Genome-Wide Identification and Transcriptional Expression Profiles of Transcription Factor WRKY in Common Walnut (Juglans regia L.)
Source: Genes (Basel). 2021 Sep 19;12(9):1444. doi: 10.3390/genes12091444 (PMC8466090; doi:10.3390/genes12091444)
Supplement: Supplementary file 1 [file genes-12-01444-s001.zip › TableS1.xlsx]

## Sheet: Sheet1
Table S1. A total of 35 transcriptome data were used in this study.
Sample name	Tissue	Source
AR1	anthracnose-resistant F26 fruits	Feng et al., 2021
AR2	anthracnose-resistant F26 fruits
AR3	anthracnose-resistant F26 fruits
AR4	anthracnose-resistant F26 fruits
AR5	anthracnose-resistant F26 fruits
AR6	anthracnose-resistant F26 fruits
AR7	anthracnose-resistant F26 fruits
AR8	anthracnose-resistant F26 fruits
AR9	anthracnose-resistant F26 fruits
AR10	anthracnose-resistant F26 fruits
AS1	anthracnose-susceptible F423 fruits
AS2	anthracnose-susceptible F423 fruits
AS3	anthracnose-susceptible F423 fruits
AS4	anthracnose-susceptible F423 fruits
AS5	anthracnose-susceptible F423 fruits
AS6	anthracnose-susceptible F423 fruits
AS7	anthracnose-susceptible F423 fruits
AS8	anthracnose-susceptible F423 fruits
AS9	anthracnose-susceptible F423 fruits
AS10	anthracnose-susceptible F423 fruits
IF6	Fruit immature	PJ Martínez-García et al et al., 2016
FL3	Pistillate flower
FL6	Mature pistillate flower
EM8	Embryo
SE7	Somatic embryo
VB5	Vegetative bud
CE5	Callus exterior
CK3	Catkins
HC2	Hull cortex
HU3	immature Hull
HL1	young Hull
HL6	mature Hull
HP3	Hull peel
LY7	mature Leaves
LY2	young Leaf
LE5	Leaves
RT6	Root
