# Supplementary material for: Genome-Wide Identification and Transcriptional Expression Profiles of Transcription Factor WRKY in Common Walnut (Juglans regia L.)
Source: Genes (Basel). 2021 Sep 19;12(9):1444. doi: 10.3390/genes12091444 (PMC8466090; doi:10.3390/genes12091444)
Supplement: Supplementary file 1 [file genes-12-01444-s001.zip › TableS2.xlsx]

## Sheet: Sheet1
Table S2. Primers used for quantitative real-time PCR.
Gene	Forward primer (5'-3')	Reverse primer (5'-3')
JrWRKY73	GAAGCCATAATCATCCCAAGC	GCTGAAGAATCCTCCTGTGCT
JrWRKY74	CAAGCCTCAGTCCAATAGAAG	TTGGTTCCCTCACAGTCTTAC
JrWRKY83	GAACCCACCAAGCAGGAT	TGGATTCTCGCTTCCTTTC
