# Supplementary material for: Genome-Wide Identification and Transcriptional Expression Profiles of Transcription Factor WRKY in Common Walnut (Juglans regia L.)
Source: Genes (Basel). 2021 Sep 19;12(9):1444. doi: 10.3390/genes12091444 (PMC8466090; doi:10.3390/genes12091444)
Supplement: Supplementary file 1 [file genes-12-01444-s001.zip › TableS3.xlsx]

## Sheet: Sheet1
TableS3. The sequence of WRKY gene family.
>Jr01_03140_p1
MSKKEVSATVSSAPAPLRPTITLPSRPSLETFFTGGPGASPGPMTLVSSFFSDNYPDAECRSFSQLLAGAMASPLARPSFYTDNSAGNSAKEPGTDTPSGFKQSRPMNLVVARSPMFTIPPGLSPSGLLNSPGFFSPLSPFGMSHQQALAQVTAQAAFAQSQILAEYQPSSVAAPTESLTHNPSFTLNEASQQHMAPSTADPRSSVMESSEASHPDRKYQPSSSAIDKPADDGYNWRKYGQKQVKGSECPRSYYKCTHLNCPVKKKVERSPNGQITEIIYKGQHNHELPLPNRRAKEGGDVNGNMNSQAKPNLDLQSQAGNWNPASDVVPDHSVPQSDRESTQAGPLQLPASSDSEEEGDAEAREEGDLTEPNPKRRVTDAGTSEIPFQHKTVTEPKII…
>Jr01_03150_p1
MSKKEVSATVSSAPAPLRPTITLPSRPSLETFFTGGPGASPGPMTLVSSFFSDNYPDAECRSFSQLLAGAMASPLARPSFYTDNSAGNSAKEPGTDTPSGFKQSRPMNLVVARSPMFTIPPGLSPSGLLNSPGFFSPLSPFGMSHQQALAQVTAQAAFAQSQILAEYQPSSVAAPTESLTHNPSFTLNEASQQHMAPSTADPRSSVMESSEASHPDRKYQPSSSAIDKPADDGYNWRKYGQKQVKGSECPRSYYKCTHLNCPVKKKVERSPNGQITEIIYKGQHNHELPLPNRRAKEGGDVNGNMNSQAKPNLDLQSQAGNWNPASDVVPDHSVPQSDRESTQAGPLQLPASSDSEEEGDAEAREEGDLTEPNPKRRVTDAGTSEIPFQHKTVTEPKII…
>Jr01_03780_p1
MELRILASYEKALMILRWSGSIGQPQIEGVMSGAPGSLIYVDEFEKGIKDHQETDNISKKRKILPIWTDHVRVRYETRLEGPHEDGNSWRKYGQKDILGAKYPR
>Jr01_06810_p1
MENYQMFFPCPSTGQSSYPLIPNYSTNMGSFNAFQDFQGESSNGTSFLGLRTENHVPKRAEVKQISHNRSSFSGDIETDQVKPGKKKGQLKKIRKPRYAFQTRTQVDILDDGYRWRKYGQKAVKNNKFPRSYYRCTYQGCNVKKQVQRLTKDEGIVVTTYEGAHNHSIEKQSDTFEHILSQMQIYTPF
>Jr01_15550_p1
MSTTSTQAILSQGGLFEDQDQVPAQMDFFSFAPNLTLPTLGCHQSLKAFSTIPPSLASDSPSSNLSGTLISSATTRDDITSDFIGSQLLSLHRSSANLWAWGDMGDCLASKRDIGGDLDGHHLGVSTLKMKKIKARRKVREPRFCFKTMSDVDVLDDGYKWRKYGQKVVKNTQHPRSYYRCTQDNCRVKKRVERLAEDPRMVITTYEGRHVHSPSHDMEESQAPSQLNNFFW
>Jr01_15790_p1
MDHYPENPNLNPNYTHLPECALDPFSWDFELSEYLNMLDGGADQDSKSQLQRIASSEKIMDSSSSAGSIGAISRNNDICKNIGVKKSKMDAGHRVAFRTQSELEVMDDGFKWRKYGKKSVKNSPNPRNYYKCSSGGCEVKKRVERDREDASYVITTYEGVHNHESPCVVYYNQTPLMVPTGWTLQANSSRSSSSS
>Jr01_15800_p1
MDHYPENPNLNPNYTHLPECALDPFSWDFELSEYLNMLDGGADQDSKSQLQRIASSEKIMDSSSSAGSIGAISRNNDIRCKNIGVKKSKMDAGHRVAFRTQSELEVMDDGFKWRKYGKKSVKNSPNPRNYYKCSSGGCEVKKRVERDREDASYVITTYEGVHNHESPCVVYYNQTPLMVPTGWTLQANSSRSSSSS
>Jr01_18750_p1
MDEMDFFAEKHGHDNEAASTDVDRKDSDGPTALEFNVNTGLNLLTTNTSSDQSMVDDGISPNVEDKRARSGELAVLQAELERMNSENHRLKETLNQVTTTYNALQMHFATLMQAQKAKTTEENGMVDGKVEVKNNGTLVVPRQFMDLRLATNGDADENSLSSSEGNGRDRSGSPAIKGEVMGSKQQFGLGKDGNSDEVLAFDQDKKEHGSKIGREDSPDQTSQGWGPNKVPRFNSPKDVDQTEATMRKARVSVRARSEAPMITDGCQWRKYGQKMAKGNPCPRAYYRCTMANGCPVRKQVQRCAEDRTILITTYEGNHNHPLPPNAMAMASTTSSAARMLLSGSMSSADGLMNSNFLTRTLLPCSPSMATISASAPFPTVTLDLTQSPNPFQLPRPPTQ…
>Jr01_22930_p1
SSSAVKILTKVLSTSFYTYRAVQFLFQFCCFLADHFLIAFFFFFLFFAYFSLMSEEDKNLYNHHGSFGYHRQEINQSSFPFINDNPSIQTKNQQGFDPTSYMSFTDCLHGSMDYNALSTAFGMSCSSSEVISPTDENWKNVGVEKSSATGENLPTPNSSVSCSSNELGTGEEESVKSKKEKQPQLCEDGAKDQKSKKAISNKPKKEKRQREPRVAFLTKSEIDHLEDGYRWRKYGQKAVKNSPYPRSYYRCTSPKCIVKKRVERSFQDPSTVITTYEGKHNHHCPANLRGNATGMLPTFLASASVGPSFPQASLFSQLLPTNNQVDLNSLFYRNLITQQQLQLDPDHGLLQDLVPSFRNEQQP
>Jr02_00640_p1
MEGPPAYFHGNSTDRIKVGTNNQPLETTNKNIFEGGSRSSGYEISKVKSGKKRDKESRMHRYAFQTRSQVDILDDGYRWRKYGQKAVKNSKFPRSYYRCTHKGCNVKKQIQRLSKDEEIVVTTYEGMHIHPLENNAAHSFEQIFRQIQTYAPP
>Jr02_04990_p1
MEPAKDQRSGHDGGGGVKEELNRYESSGFEEGFNEKTTAIDQAGNHGRPCHEHQDLKSSSPLQKDSSCSKKDDQLQSARAEMGEVREENQRLKKYLDLIMKDYQTLQMQFYDIVQQDGRKATDDSAKNHQEIEEPGFVSLSLGRAPSDTKKGEKSSTTVSSQRKEADEQAKEGLSLGLMDYKLELSKSREGRESLSKTSPVNSSDQEPIKEEADHQETSPLGKAQKTMRSEDDHEAVPQQNPVKKARVSVRARCDTPTMNDGCQWRKYGQKIAKGNPCPRAYYRCTVAPSCPVRKQVQRSFEDMSILITTYEGTHNHPLPMSATAMASTTSAAASMLLSGSSSSRPGHGPSATTVSTTAADLHGLNFYLSDNSKSNHFYLSNSSYSSSPSFPTITLDLT…
>Jr02_16420_p1
MENGWSWEQKPLIGELIQGMELVKQLRVQFSTTSSSPETVETLLQRILASYEKALMILRWSGSIGQPQIEGVMAGVPGSPISVNGSLGTDEFDKGIKDHQGTDDISKKRKILPRWTDHVRVRSENGMEGPHEDGYTWRKYGQKDILGAKYPRSYYRCTLRNSQNCWATKQVQRSDDDPNAFDITYRGRHTCSHATNLVPASPSPEKQEQKQYNNNNHNEQERPLDILRDIRSSLRIVTEDLDSKEITYPFSFPSTSFGCMNSENNGFSLSALDRNTLLDCFSSPFLSPATPESNYFAVSPLEKSNFGGVHNEHHFESELTKIISAKASATSSPVLDLDFSLHPVEIEPNFPFDSQPFLS
>Jr02_17180_p1
MSDFGRMEDWDLQAVVRGCINEARPTIFGNPKSCFAPLSAVEDDLLSFPEISETATVLDELDKLYKPLIYPVLQPVPSQTILASSVSVPKEIKQPEQKPSIKEPRRSRKNQHKRVVQHVTAAEGLCSDMWAWRKYGQKPIKGSPYPRSYYRCSSSKGCSARKQVERSPLEPGVFIVTYSSEHNHTRPTRRNSLAGSTRSKFPTPKRKNNSPSSSKVLSPTTPLMASIEDEFVQSASLKKEEEQMVQENENNGTFNMPDMILDSDIDLFPSLEDFDELTAEPAMDGCFLDQLLDNFPVPWFVERSTAVSDGH
>Jr02_17190_p1
MSDFGRMEDWDLQAVVRGCINEARPTIFGNPKSCFAPLSAVEDDLLSFPEISETATVLDELDKLYKPLIYPVLQPVPSQTILASSVSVPKEIKQPEQKPSIKEPRRRKNQHKRVVQHVTAAEGLCSDMWAWRKYGQKPIKGSPYPRSYYRCSSSKGCSARKQVERSPLEPGVFIVTYSSEHNHTRPTRRNSLAGSTRSKFPTPKRKNNSPSSSKVLSPTTPLMASIEDEFVQSASLKKEEEQMVQENENNGTFNMPDMILDSDIDLFPSLEDFDELTAEPAMDGCFLDQLLDNFPVPWFVERSTAVSDGH
>Jr02_25510_p1
MAQSQASSLSELRLCSSANVAPGNTDDPGLPVSTSAASAKYKLMSPAKLPISRSACITIPPGFSPTSFLESPVLLSYMKAEPSPTTGSFIKPKVVHGAVGSATHLVTTVCSNTDTFNERNSSCFKFEPHATSNMVPADLNHQRSEQFMQVQGQCQPHAFASSASVKNEMANSSNNLSVSAPIHMATSVASAPAEVDSDDPSHGATPNTRFQASQLDPKGNGVSAGTERSSEDGYNWRKYGQKLVKGSEFPRSYYKCTHPNCEVKKLFERSHDGQITEIIYKGTHDHPKPQPSRRYTAGTIMTIQEERSDKAQALTGRDEKSAIYGQMSHTDPNGTPDLSPVTANDDSLDGAGSIPNRINDDVDDDDLFSKRRKMDIGGLDVTPVVKPIREPRVVVQTLS…
>Jr02_25520_p1
MESIWAEPSPTTGSFIKPKVVHGAVGSATHLVTTVCSNTDTFNERNSSCFKFEPHATSNMVPADLNHQRSEQFMQVQGQCQPHAFASSASVKNEMANSSNNLSVSAPIHMATSVASAPAEVDSDDPSHGATPNTRFQASQLDPKGNGVSAGTERSSEDGYNWRKYGQKLVKGSEFPRSYYKCTHPNCEVKKLFERSHDGQITEIIYKGTHDHPKPQPSRRYTAGTIMTIQEERSDKAQALTGRDEKSAIYGQMSHTDPNGTPDLSPVTANDDSLDGAGSIPNRINDDVDDDDLFSKRRKMDIGGLDVTPVVKPIREPRVVVQTLSEVDILDDGYRWRKYGQKVVRGNPNPRSYYKCTNAGCPVRKHVERASHDPKAVITTYEGKHNHDVPTARTSSHDT…
>Jr02_26760_p1
MAGMDDNVVIIGDWVPPSPSPRTFLSALLGDDIGSRSVSEPPSSNRTEEIFLGSSESNTNVKNNGAKDGVSGEKFTDLGSFPEHKSSCSRAGLMERMAARAGFNAPRLNTQGIRSADLSSNPDIRSPYLTIPPGLSPTTLLDSPVFLSNSLVQPSPTTGKFSLVPNGDSRSLTLISEAPDRSKDNPFEDINTSSFAFKPITEPASSFFFGASSKITSKTLPQQSFPSIEVSVQSESSFQSVEHTNQTQNRSSLYSQADNSRSSTERDIGTNVSVADQTAFDAVGGSTEHSPPLDEQPDEEGDQRGSGDSVAAGGGGGGAPSEDGYNWRKYGQKQVKGSEYPRSYYKCTHPNCQVKKKVERSHEGHITEIIYKGAHTHPKPPPNRRSAIGSTNPLMDMQL…
>Jr03_08810_p1
MDGRFITSSFISSSGQEENIDSTPENGAESPPSTIFDDMKITSSVSSPRKSRRAIQKRVVSVPIKDVEGSRLKGESNTPPSDSWAWRKYGQKPIKGSPYPRGYYRCSSSKGCPARKQVERSRVDPTMLVVTYSCEHNHPWPASRNHHSTNKPIKPETVASAKPEPEEKFADLGDESSLMASDEFSWFGDMETTSSTVLESPIFAERISGDADVAMFFPMREEDESLYADLGELPECSVVFRGVGPRLEIC
>Jr03_11540_p1
HPTSSLTQLFSSLSLSLSFRLAPSVSLPAQFLSRPLPASATFPAFMDKGWGLTLDSDSLGSFLLNKNKLSHDRMFPGIQFPVPLDRREEQKTPPPSDENRYFVDEVDFFADKRRSGFHKDDVDDSKAIIKKENFHGEATPRPDLDVNTGLHLLTANTGSDQSTVDDGISSDTHEDKRAKTEQLAQLQIELQHMNSENQRLRDMLGQVSNNYSTLQMHLVALMQQQQNHRADSTQEHEVVVEGKSEVTKQDVGGAVVPRQFMDLGPGAIAEINEVSQSSSEDRTISGSPRNINTGKSEIVSFDKDRDGKRVGREESPQSETQGWVPNKLPKLNASKAIDHQSTEATMRKARVSVRARSEAPMITDGCQWRKYGQKMAKGNPCPRAYYRCTMAVGCPVRKQ…
>Jr03_11550_p1
FYSRANCTGKRLHPTSSLTQLFSSLSLSLSFRLAPSVSLPAQFLSRPLPASATFPAFMDKGWGLTLDSDSLGSFLLNKNKLSHDRMFPGIQFPVPLDRREEQKTPPPSDENRYFVDEVDFFADKRRSGFHKDDVDDSKAIIKKENFHGEATPRPDLDVNTGLHLLTANTGSDQSTVDDGISSDTHEDKRAKTELAQLQIELQHMNSENQRLRDMLGQVSNNYSTLQMHLVALMQQQQNHRADSTQEHEVVVEGKSEVTKQDVGGAVVPRQFMDLGPGAIAEINEVSQSSSEDRTISGSPRNINTGKSEIVSFDKDRDGKRVGREESPQSETQGWVPNKLPKLNASKAIDHQSTEATMRKARVSVRARSEAPMITDGCQWRKYGQKMAKGNPCPRAYYRC…
>Jr03_15160_p1
MSDESKDQLYFHEYLFQDNQNLASGSSSTGSYNHKPPASIAAASSAYSSQGFDPSNYMSFTECLQTPMDYNSMASAFGLSPSSSEVFASMESNPKPMEVGDLGGGGSDIILVTPNSSISSSSTEVGAEEDSGKSSKDKQPKETEVGGESSKKVSKAKKKGDKKQREPRFAFMTKSEVDHLEDGYRWRKYGQKAVKNSPFPRSYYRCTTQKCTVKKRVERSFQDPSTVITTYEGQHNHPIPATLRGNAAAMFPPSMFTPPIGGRPTFIPQDFFAQMPQIMSSSTSQAGGGTAPGSINYSQINPNYPHHQQYQLPDYGLLQDIIPSMFLKQEP
>Jr03_17800_p1
MYCSLFMPRMENYQGDLTDIVRASGGAYGTGAAGASEPSPGWRFPSDPMNFLSVVEEPRDNFGDPFSYMRDPLLNELDVSGSSFFSSTSSAEMMGSSTAASVEDTGGFNGGNTTGAVVGVGGGSTSTILAPSNYLEDEMKRPCNIFSRMLQISPNAKLPVSPCGSPVMAAAASPRGIKASAMIAGDMITANSPNGCFIDNTGVQISSPRNPGIKRRKSQAKKVVCIPAPAAVNSRPTGEVVPSDLWAWRKYGQKPIKGSPYPRGYYRCSSSKGCSARKQVERSRTDPNMLVITYTSEHNHPWPTQRNALAGSTRSQPSKSNAASRNFQGAQSQKPTSPKEEQKESSIDDHVSPIVCGSSTTSASVKEELDEVEKQVLEIDDGEFSTAEEFSYRPTMPGS…
>Jr03_22520_p1
MDIKEAERVVIAKPVASRPTCSSFRSFSELLAGAIDASPSNVCSTAVAAIRPKTVRFKPAVIRAPAGLVSSQAGISGAAVCNSSDNVSKFDSKSTVVYKPLAKLVSKTTVSLLANMGNFSTGHQQQQQQPVEASVQHSNQEKRNFRSQISSNLHQNIPSHVESNQTGGHSKIASPNLEEDPKAVLTTANSDRPSYDGYNWRKYGQKQVKGSEYPRSYYKCTHPNCPVKKKVERSLDGQIAEIVYKGEHSHSKPQPPKRNSSGTQGLGFVSDGPGQDANNTLWANHHNEGNEGSEGRVESQNEVGLPVRSTYHGNIPVPCDPVATGAVNVGGVTPDNSCGLSGECEEGSKAMEPEDDEPRSKRRKSESRSYEAGVSGEGIQEPRIVVQNSTDSEIMSDGF…
>Jr03_23890_p1
MEEVMAAMWTTDRLEDELVRELLDNQSPFFVLPAEKISSGTEPNTGSTTHDPYLQHEEAVNRLMISNVYSGPTIEDIENVLSLTTSDDQPHQELSSQARISLLERGINKVEHKYTLRIKNHGNAIADDGYKWRKYGQKAIKNSPNPRSYYRCTNPRCSAKKQVERSLEDPETLIITYEGLHLHFAFPYFLNGQNQAPSSSTPLTMKKSKKTTSKAQDQETQQPQEAQADHLHHHHLDQSPPSDDLTTTAHQLAVVSPSEVVCPRDQYSWNPDHQEGMATQGLLQDVVPFMIRNPPINNINNVASSNSSSCSSYRSPTPSSTSPSNSLSWCAAYSATCFDIGF
>Jr03_26460_p1
MTSITDHISNKKENNMDSISQDRVLNNNTAVSWGYSDRNGNGSEIPKFRSFPPSSLPLSPPPVSPSSYLAIPPGLSPTDFLSSPLFSSMNYANLPSPATGAFAGQAFHHYMSDSANYNQQLGMKEKEKFSSDFSFQPETKPAAISSSIFQSSFAVEESMKRQQEAWKFNKPTNQTEFSLEKVEVKSEFAPMKSFRTSEMATTQEKMQSSSAPLSSHDQYTRPPQYIREQRKTDDGYNWRKYGQKNVKGSENPRSYYKCSFRGCPMKKKVETSLDGQITEIVYKGSHNHPKPQFNRRSSSQSIQPSSYTNMGNPDHSAVTVGNTQMESVTAQEDSSASVGEDEFDQRSPTSNSAGDDDENEPEAKRWKKENENEGISASGSRTVREPRVVVQTTSEIDIL…
>Jr03_27180_p1
MECCWPENLPSKPKRAIDQLIEGHQLATQLRSLLSNSLGDDESTLPPAKDLLLKILNSFQNSLMILNSDDPDHELMSPIPTKTHGTKSESSEGSCRSISTLKDRRGCYKRRKNTQTWTKDTATLMDDGHAWRKYGQKVILNAKFPRHYYRCTHKFDQGCQATKHVQRIQEEPQKHRTTYIGQHSCRTFLKAPELILHEDPSDPTTTDSSILLSFDNTISNKQDSHFLISSFQSIKQERKEEKPAIRSDDIITHTHNQSSSSDYLLSPDRTPDLDPFGHMPVLSESDNGDVISGVIVPPVDFDDDVFSFNF
>Jr04_00630_p1
MECCCLPESLPSKPERAIEELTQGHQFATQLRSLLNTSLRLDVSTSAANDLLLKILNSFHNTLLILNSDDGVSLHLHENNPAPAPLSTESSEGSCRSSTPSTLKDRRGCYKRRKNSESWTKDTPTLLDDGLAWRKYGQKLILNAKFPRNYYRCTHKFDQGCQATKHVQRIQEKPPKYRTTYIGNHTCRTFHKAPELILDSSPFLLSFDSTIPNKQDSPFFSSFQPIKQEEHREDKPSSDDITHNHSFSSDFLLSPDRSAFDSLGHLTALSESDNGDVMSRFMVEPVDFDVDSLFFDF
>Jr04_00640_p1
IYIYLSFLTNKCNFLRCRKNSESWTKDTPTLLDDGLAWRKYGQKLILNAKFPRNYYRCTHKFDQGCQATKHVQRIQEKPPKYRTTYIGNHTCRTFHKAPELILDSSPFLLSFDSTIPNKQDSPFFSSFQPIKQEEHREDKPSSDDITHNHSFSSDFLLSPDRSAFDSLGHLTALSESDNGDVMSRFMVEPVDFDVDSLFFDF
>Jr04_01100_p1
MMNSFTDLLANNNCSKNKIIMDSHSISQNTNSNNTALSWGYSDHRIGNEIPKFKSFPPSSLPLSPSSYLSFPPAAFSPTDFLNSPLFASNYTNLPSPTTGAFSGQAIFQNMTDSGYNQLAAGIKEEEKFSSDFSFQPQTDWPATTSSSSFFQPSSTVEESLKRQEASWSFIKPSNQTVFPSEKVEAVDSEFAPVKSFTSEMATNQETMHSINASSDHNQYTQQPQYIREQRKTDDGYNWRKYGQKNVKGSENPRSYYKCSYRNCPMKKKVETSLEGQITEIIYKGNHNHPKPQSNRRSSSQSIQPSSCTNSGISDQSVVTLGNTKMESVTTQEESSVSVGEDEFDQGSPTSNLVGDDNENEPEAKRWKGENENESFSTSGSKTVREPRVVVQTRSEIDI…
>Jr04_02750_p1
MEELRATWPDGLEDELIRELLDNQSPFFLLPEMTTEPAEDAIMNRLISSTSTVYSEPTISEDLEDAFSTTTSKDHQHQELSQPRISALMERGLNKVENKNTLKIKSYSNAMADDGYKWRKYGQKAIKNSPHPRSYYRCTNPRCNAKKQVERSSEDPQTLLITYEGLHLHFAYPHSFIPAESQPINPTIKKAKKTHDQTQQILQELQESSADLTTPPDLQQQQQLFLRTSLDYPQEWDPEGMVVPQGLLEDVVMPFMIPNPLNNNTSPNYSSCSSYPSPPPSPPLFWSCATHSSACFDIGIEH
>Jr04_03880_p1
MDTKEAERVVIAKPVASRPTCSSFRSFSELLAGAIGVSPSNVCSTAVAAIRPKTVRFKPMVNRAPPGPVSSQAKISGAAVCNSADEVPKFESKATVVYKPLAKFVSKTTASLLANMGNFNTNHQPPQPTVETSSQHSNQEKHKFRSQKSSNLHQKIPSQVETMQAVGPSKVASQKLEEDPKALPTTANGDSPSYDGYNWRKYGQKQVKGSEYPRSYYKCTHPNCPVKKKVERSLDGQIAEIVYKGEHNHSKPQPLKRNSSGTTQTLGIVSDGLGQDTTSSRYNEGNDGSEGRVENQNEVGLAARSTYQGNAALTCDPVSTGTIAAAAAGTPDNSCGLSGECEEGNKTMELADEKPKSKKRKSESQSNEAGLLGKGTQEPRIVLQNSTDSETMTDGFRWR…
>Jr04_03890_p1
MDTKEAERVVIAKPVASRPTCSSFRSFSELLAGAIGVSPSNVCSTAVAAIRPKTVRFKPMVNRAPPGPVSSQAKISGAAVCNSADEVPKFESKATVVYKPLAKFVSKTTASLLANMGNFNTNHQPPQPTVETSSQHSNQEKHKFRSQKSSNLHQKIPSQVETMQAVGPSKVASQKLEEDPKALPTTANGDSPSYDGYNWRKYGQKQVKGSEYPRSYYKCTHPNCPVKKKVERSLDGQIAEIVYKGEHNHSKPQPLKRNSSGTTQTLGIVSDGLGQDTTSSRYNEGNDGSEGRVENQNEVGLAARSTYQGNAALTCDPVSTGTIAAAAAGTPDNSCGLSGECEEGNKTMELADEKPKSKKRKSESQSNEAGLLGKGTQEPRIVLQNSTDSETMTDGFRWR…
>Jr04_10710_p1
MSDEPKDLFYHYLFQDNQHLESGTGSSYNEKPSYNNYSQGFDDDPSNYIMSSFNDQSLERPVVYNSMASAFGLSRPPSSSQVFASVESNPKPREVGDLGGGSGDVIVTANSSISSSSTEAGAEEDSDHKSSKDRQPKELEDGGESSKKVPSKAKKKGEKKQREPRFAFMTKSEVDHLEDGYRWRKYGQKAVKNSPYPRSYYRCTTQKCTVKKRVERSYQDPTVVITTYEGQHNHPIPATLRGSSTAAAAIFSPYCMFTQPTAAARPVPTFPQHYFATHAQIMPAQTMNSQHHEQNPPNNPHHDHQLPDYGLLQDIIPSMFLKQYNYEP
>Jr04_13770_p1
LHRTSPPLHFFLSILLYLYLSSLSVCNFFPAFMDKGWGLALDSDSLGSFLLDKNNRAQERMFPAGIHFPVSLDRRDEHASPAPSDENRVVVGEVDFFAAKSRLAGHDRNDRDVDDSKTVVKKENSHGEAAPCRPDNLDVNTKLHLLTANTGSDQSTVDDGVSSDAEDRRAKAELAQLQTELQSMNSENQKLRDMLSRVSNNYSVLQMHLVGLMKQQQNHGTDSTNDHEVVDGKSEEKKPEDGVVVPRQFMDLGPGTIAETNEVSQSSSEDRTISASPRNMNSTGKDEVVSFDKGRDGKRLGRDQESPESETQGWVPNKVSKSNTSTPVDQPTAEATMRKARVSVRARSEAPMISDGCQWRKYGQKMAKGNPCPRAYYRCTMAVGCPVRKQVQRCAEDRS…
>Jr04_15560_p1
MDGRFVNINQFMISTSTEELEENTDTIPENGDASPPSTIFNDMKNTSASSPRKRRDIHKRVVSVPIKEVEGSRLKGESSTPPYDSWAWRKYGQKPIKGSPYPRGYYRCSSSKGCPARKQVERSRLDPTMLVVTYSCEHNHPWPASRNHHSASSKPEKPETVKLKPEQEAAPEEKFADLGDESLMASDEFRWFGDMETTTSTVLESPIFAERSSGGDSDVAMLFTMREEDESLYADLGELPECSVVFRGVGPGVEIF
>Jr04_15570_p1
MDGRFVNINQFMISTSTEELEENTDTIPENGDASPPSTIFNDMKNTSASSPRKSRRDIHKRVVSVPIKEVEGSRLKGESSTPPYDSWAWRKYGQKPIKGSPYPRGYYRCSSSKGCPARKQVERSRLDPTMLVVTYSCEHNHPWPASRNHHSASSKPEKPETVKLKPEQEAAPEEKFADLGDESLMASDEFRWFGDMETTTSTVLESPIFAERSSGGDSDVAMLFTMREEDESLYADLGELPECSVVFRGVGPGVEIF
>Jr05_06670_p1
TIFFTSFLSSLLLCLEAFTLRSLYLSLSLIRLPAPLSMASSSGSLDTSANSQQSSFTFSTTDHHPFMTSSFSDLLASAYYDENQNNNTAGTENNKHRGLSDRVAERTGSGVPKFKSTPPPSLPISPPSVSPSSYFAIPAGLSPAELLDSPVLLNSYNILPSPTTGTFPAQAFDWKSNFGNNQQNVKKEDNNYDFSFPTQQRPPLSSSATNFQSSNTTIQTAQQQAWSFQDPSKQADFSSGKKSTVKHEFGSLQSSQSYSPEIATIQTNNTQSNNNGGFQSDYGSCHQQAQSLSKKSGDGYNWRKYGQKQVKGSENPRSYYKCTYPNCPTKKKVEMSLDGQITEIVYKGSHNHPKPQSTRRSSSSSASSHSIQASNSAPTEIPDQSLATHGNGHMDSVGT…
>Jr06_10190_p1
MSDTNSRPSDSNDRHYYAIEQPNFELSEFLMFEGWPEEDDAYNASVGPVDQNPVNQANEVVLGDDGSGRERRERVAFKTISEVEILDDGFKWRKYGKKMVKNSPNPRNYYRCSVDGCPVKKRVERDKDDPKYVITTYEGVHNHQSSF
>Jr06_10200_p1
MSDTNSRPSDSNDRHYYAIEQPNFELSEFLMFEGWPEEDDAYNASVGPVDQNPVNQANEVVLGESGSRSGSHIEEGSDSRDDGSGRERRERVAFKTISEVEILDDGFKWRKYGKKMVKNSPNPRNYYRCSVDGCPVKKRVERDKDDPKYVITTYEGVHNHQSSF
>Jr07_07490_p1
MEEDWDLQAVVRGCASSGATSSSSTAAAATTTASFLGNFHSNSWFSDFGGVGEQACSQLLSFPDPFEARYVSEELHELYKPFFPKPQPLSPQTSPNISPFSSLSSLTASSKAQTQQPHPQHQQQLPKQSQAGSGTGQRSKRRKNLLKKVCQVPAEGLSSDIWAWRKYGQKPIKGSPYPRGYYRCSSSKGCLARKQVERNRSDPGMFIVTYTAEHNHPAPTHRNSLAGSTRQKPFPNQTVPASSDDSKKPNSTKPSSPATSMEDELGLPQSTTTDSKEESREEREDTVEDEEEDEFGISDVVLSDDFFVGLEGLVGPASEDCFSDHLPATFALPSWVANNAG
>Jr07_07550_p1
MEDQELPITPPPPPLLPTQNPPFFFLPSIPSSSLHPPLDSPQALMNPEIDWVSLLISSGQVRLTDKKPMIESANNSTMAGNIGTTVNEDREKGYKDHKRKAGSMKKATRPRFAFQTRSKDDILDDGYRWRKYGQKAVKNSIYPRSYYRCTHHTCSVKKQVQRLSKDTSIVVTTYEGIHNHPCEKLMETLTPLLKQMHFLSAF
>Jr07_08410_p1
MEKTVLDCEQKTLIGELNQGMELAKQLMNHIHHSSSHEAREVLIGKILSSYEKALSALNWGAFVGQTKPIVSKTESPSHFGNSSPRSEGSDPEYKHREVYKKRKTLPKWTEQVKVVSGTGLEGPVDDGYSWRKYGQKEILGASFPRGYYRCTHRNAQGCLATKQVQRSDGDPTIFEVNYRGRHTCSQSSRFNMAPSSRSTSEGLKENRNTCHPKQQPHEEEKPPQEIVSEFGAGHLVKAEELENGEDDKFPIFSFPSTPIESENADDNIFFESSMLNSHFIGSLSPTFISPATSESNIFCMSPCHINSHGLCHNLHTSESDHTDIISAPTSAANSPIGNFDFSLDLDPYFQFDNPEFFS
>Jr07_11780_p1
MIESMDRKDQELKTENSLMANSTFSDEIPSSFALPASIFDMPCDHLGDHQKGSSSGFMDMLAGISDYDPSLFEWFSAPMMSQPQQQQQQQEQQHPLPSPASTFPESSEVVNTPATPNSSSISSSSNEAANEGQNKAGGEEEDQDDQDKNKKQLKPKKKNQKRQREPRFAFMTKSEVDHLDDGYRWRKYGQKAVKNSPYPRSYYRCTTAGCGVKKRVERSCDDSTIVVTTYEGQHTYTCPVTPRGSIGIATEAAGYSSLSSPFVVPQPQYQQQQHPYIYSSQLPLNVNTTNLNPSFPHFVQERRFGTSSATLLRDHGLLQDIVPSQMRKEPKEE
>Jr07_12950_p1
MASSHSGEDHELARPINITNSVLENFMDAKSAHQIKEFHDFFARSRCCEVTEKRPPLPHQDDKDAPPLILKPKAECSIDIAGLKDLIPSPNKVTQESKFDQEQPLNQLTLLRANLELARNENGNLKEMLARATKNYTALQSHLLLLVQPRAANIKHYFLPKDDDSTHEKGGSLVHDDRRPSTPLLLDINEPFRSDNWKQEMDRHDDHDMINKIERKHKISTADDDDHGGVNDVHDHHHTSKLRWEPRTKNVEPAEKIPAHDHEVSCKKARVSIRARSNAPLMSDGCQWRKYGQKTAKGNPCPRAYYRCTMAIGCPVRKQVQRCAQDTSVLITTYEANHNHPLPPAATIMAKTTSAAANMLLSGSTTSDMINSSKAGLFTSMPSYPSSTIATTSYSAPYP…
>Jr07_32310_p1
MDYSSWTSTRLDLNSNPTGHVLDEASNKEVESNFIDFERKLSVKHEETGALMEEMNRVNAENKKLTEMLTVMCENYNALRSQLTDYMSKNVLEKDPSPTRKRKSESSNNVTGIHGNSESSSTDEESCKKPREEVIKAKISRVYVRTEASDTSLTVKDGYHWRKYGQKVTRDNPCPRAYFKCSFAPSCPVKKKVQRSVEDQSVLVATYEGEHNHPHSSQLEATSGSSRCVTLGSQPGSASLSLSGPTVALGLAKSKSSSIDTKQSKPRIDSPEVRKFLVEQMASSLTKDPNFTAALAAAISGRILPQNPTGKW
>Jr07_38970_p1
MEEIVSLILLGCKLARELESNLPNLADQPNLLSKSCDEVIKVFRTAKERLYKTQGSTSTSAHPGHMMTLFHEPQDSLVQQPRIEFASLQQWLRSSCTQAMDNIIQMQLLQADHQRISPSVDMQDSGSKVINVAGLCTGGSDRVEGSAPSRSIGGELHPLHASESGIASSSQRQRRRKDDGERRTVIKVAAPRVGNTEIPPEDDFTWRKYGQKEILGSRFPRSYYRCTHQKLYQCPAKKQVQRFDDDPYTYEVIYRGDHTCHMSSTAPSLPPPPPVDITDHNDHEMAQIINIQPPQDSSSVPSSRSWLSTEYFSLRTGGGTIVGGGAGPSTTRSGKELVAVEYPVTDLADAMFNSGSSSSNSIDFLFHSNELNRGQQGDNGNNTVD
>Jr07_38980_p1
MGTPNWPEKLSTTRKKVIRELVEGQDYATQLKSLLHRPTEDHESLSTEELVSKILRSFSETLSVLSSCEPGEVSQSQAVSHADSHCDVRRSEDSGESRKRLAAKDRRGCYKRSRKTSHTWAIVSHTTDDDHEWRKYGQKEILNAKYPRSYFRCTRKYDQGCGATKQVQRMEDDPQMFQTTYIGHHTCRDILKAPQIITDSDPWETFLVNSDTMMMNIPAGKQDRALSSSTTTIKQESLESLSDLTDSISSFGTNLWSELKAFEFLEPAVMSPKTGSDNGDVGSTMYSCTDTCSLSLDMDFEGGFDFDGSEFL
>Jr07_38990_p1
MGTPNWPEKLSTTRKKVIRELVEGQDYATQLKSLLHRPTEDHESLSTEELVSKILRSFSETLSVLSSCEPGEVSQSQAVSHADSHCDVRRSEDSGESRKRLAAKDRRGCYKRRKTSHTWAIVSHTTDDDHEWRKYGQKEILNAKYPRSYFRCTRKYDQGCGATKQVQRMEDDPQMFQTTYIGHHTCRDILKAPQIITDSDPWETFLVNSDTMMMNIPAGKQDRALSSSTTTIKQESLESLSDLTDSISSFGTNLWSELKAFEFLEPAVMSPKTGSDNGDVGSTMYSCTDTCSLSLDMDFEGGFDFDGSEFL
>Jr08_00860_p1
MNNMEAHTSCNEKVKTLRADLESLRKENETLRFKLEVMNRKCNILQAHLQETKAQQLGMIDLTASRSNSEITSCKRSVRIIEQQVPTPTKTSQILVRTNSTDNSQVVKDGYQWRKYGQKVTKDNPSPRAYFRCSMAPAGCPVKKKVQRCVEDKSFLVATYDGEHNHDVNSHVPALIRDSLSSSDDEVVLPKGSVANIIYPEPYPLENHSFRPSIALDLSLSGPNDKSPRNDVVENKLHNNNCNDIEEYVASLTKDPSFTAALAAAVARSMPHLHAA
>Jr08_00870_p1
IHFTTFETQLLVPRTYIIIYNLITSFFPDSKLYTSTMESKSLVDSSTSLDLNLNPFRPMDHEEAPKNEFDGVLGAQACDQKASIKEEAGHLAEELDRISSENKKLTEMLARMRENFNALQSHLIDIESKNSTKEIFIKSRKRKAEEEYFGNMFSHSSNEESYCKKAENFNTKVSRVCVRTDASNTNLAVKDGYQWRKYGQKVTRDNPSPRAYFRCSFAPSCPVKKKVQRSTEDPSLLVATYEGEHNHMHPFRADQLSSSSGGSSQCANLGSVHSFSSMRSSSRPTVTLDLIQSGLCESAKNSNQHVDSPAFQQFLVQQMASSLTRDPNFTETLAAAISGRILDYTQN
>Jr08_00880_p1
MDHEEAPKSSSTLDQKNEFDGVLGAQACDQKASIKEEAGHLAEELDRISSENKKLTEMLARMRENFNALQSHLIDIESKNSTKEIFIKSRKRKAEEEYFGNMFSHSSNEESYCKKAENFNTKVSRVCVRTDASNTNLAVKDGYQWRKYGQKVTRDNPSPRAYFRCSFAPSCPVKKKVQRSTEDPSLLVATYEGEHNHMHPFRADQLSSSSGGSSQCANLGSVHSFSSMRSSSRPTVTLDLIQSGLCESAKNSNQHVDSPAFQQFLVQQMASSLTRDPNFTETLAAAISGRILDYTQN
>Jr08_00890_p1
MDHEEAPACDQKASIKEEAGHLAEELDRISSENKKLTEMLARMRENFNALQSHLIDIESKNSTKEIFIKSRKRKAEEEYFGNMFSHSSNEESYCKKAENFNTKVSRVCVRTDASNTNLAVKDGYQWRKYGQKVTRDNPSPRAYFRCSFAPSCPVKKKVQRSTEDPSLLVATYEGEHNHMHPFRADQLSSSSGGSSQCANLGSVHSFSSMRSSSRPTVTLDLIQSGLCESAKNSNQHVDSPAFQQFLVQQMASSLTRDPNFTETLAAAISGRILDYTQN
>Jr08_11260_p1
MKKKEVIKMEETFGSSLFAEHISDGFPFSGIFDFSEGEKSSLGFMELLGIQDCSTPSLFDLPQAPSMASSAPRPVTTLKEGSEVLNQPATPNSSTISSASSEAVNDEQTKAVDQEEEQQEKTKKQLKPKKTNQKRQREPRFAFVTKSEVDQLEDGYRWRKYGQKAVKNSPFPRSYYRCTTASCNVKKRVERSFTDPGTVVTTYEGQHTHPSPVMPRQSLAGAPPGPGISVGCATNFAMPMSRTSTLSQYQQQRQQSFIMNTLSPSTYGTHHHGLTNTPGLRRDIRFCTPGSALLRDNGLLQDIVPSHMLKEE
>Jr08_11410_p1
MDRSLSPKLHKEIPEELKPETQASKRRKMVQKHVVKVRIGANVGKLKNEGPPSDLWSWRKYGQKPIKGSPYPRGYYRCSTSKGCSAKKQVERCRTDASMLIITYTSSHNHPGPDLSTTNLIQPSKEPQNHSNEDLSTLPKQEQLELAHDEKRNEPNMTTREKDPVEDHFHYIQSPISGSQDIIANQGEDPFIVQHERLHETVLLLDEEPLCYSQFMNLSTPISEENDFYDELEELPTYSSFTSSARNNFPNERIPVVPS
>Jr08_14560_p1
MEVEDVKAIAGGSSSLELNPSKSIAERRAAKCGFNAKCLKTALFRTTSPLASPGARLTIPAGISPTALLDSPIMLPNIRAPHSPTTGTFPLPPLSHESLMLSSMAAEDGDRGSDVGSLNFVPYENPDSLSGFYGFIDQNADVDNNALESVPTQMDFEFPAELPKADTIDDCAMGLSTDGKVLKNMVMNAKCMDLSIHHSEVASDQKSLPKEPIHGEDVGANHLLEGDLKGSYPSTGVLRASEDGYNWRKYGQKQVKGSEYPRSYYKCTHSNCQVKKKVERSHDGQITEIVYKGTHNHAKPQPNRRASVSSTFSIDETSEMGEDGGTCIKSEGGSVWRNIQLGSKDVKFGSDWRANGMEGTSSASVLLEFSDPLSTAQRKSVGVLESGETPELSSRLGSH…
>Jr08_14570_p1
MEVEDVKAIAGGSSSLELNPSKSIAERRAAKCGFNAKCLKTALFRTTSPLASPGARLTIPAGISPTALLDSPIMLPNIRAPHSPTTGTFPLPPLSHESLMLSSMAAEDGDRGSDVGSLNFVPYENPDSLSGFYGFIDQNADVDNNALESVPTQMDFEFPAELPKADTIDDCAMGLSTDGKVLKNMVMNAKCMDLSIHHSEVASDQKSLPKEPIHGEDVGANHLLEGDLKGSYPSTGVLRASEDGYNWRKYGQKQVKGSEYPRSYYKCTHSNCQVKKKVERSHDGQITEIVYKGTHNHAKPQPNRRASVSSTFSIDETSEMGEDGGTCIKSEGGSVWRNIQLGSKDVKFGSDWRANGMEGTSSASVLLEFSDPLSTAQRKSVGVLESGETPELSSRLGSH…
>Jr09_02120_p1
MEAATKEFISSTGYGGHVGNGRPCHENYLKPPSSPLQKDSRSCSKQDVQLQSTRVEMGEVREENQRLKKSLDRIMKDYQNLQMKFFDIVQKDRIKTTNNTNNHQEIEESDQFVSLCLGRVTHDTKEDKKTVVSSKLKEDDQAKETSLTLGLDRRFELSDQSKVNAKSFEELKKEARETCWQHSKVLKTKRSGDDEVQQQNPVKKARVSVRARCDTPTMNDGCQWRKYGQKISKSHPCPRAYYRCTVSPSCPVRKQVQRCAEDISILITTYEGTHNHPLPMLATTMASTTSAAASMLLSESSSSQLPAGHSSSVTTANSTATANLHGPDFFKLDSLKSKHFYLSKSSFSSSVPSHPTITLDLTSSPSSSLPRFNIVSSEYRPKYSSATLNFNSSDPNAMS…
>Jr09_09980_p1
MEKSWSWEQKTLVSELIQGMEMAKQLRVQFSANSSSETTETLLHRILASYEKALMILRWSGSMGQTQTAAGVTTGVPGSPISVDGSFGSNEFDKGLKDHRDLNDVSKKRKIMPRWTDQVRVSSETGLEGPHDDGYSWRKYGQKDILGAKYPRSYYRCTFRLTQNCWATKQVQRADEDPNVFEITYRGRHICSHATNLVPAPSSPEKQEQKQNFNNNDNQQDQRPLDILGNIGSSLRIVTEELENKEMSYPFSFPSTSFGCTKSENSNFSLSTLDNNTSFLGSFSPPFLSPATPESNFHSVSPFQNSNFKGAHNGHRSESDLTEIISANTSATSSPILDLDFSLDPAEIGHFPFDSSAFFA
>Jr09_10570_p1
MDELPPPLTQNINVPISYSLPSPPHDLMQTQIASDIDWVSLLSAGPNFKFGNQNPSSTSKPLTATNGAVGLENGSTKHKGRVGRTKKTIPPRIAFHTKSPDDILDDGFRWRKYGQKAVKNSIHPRSYYRCTHHTCYVKKQIQRHSKDASIVVTTYEGIHNHPCEQLMESLSPLLRQLQFLSSF
>Jr09_10580_p1
MSEFACCMEDWDLQAVVRGCINIEAPTGILGDPKSCFPPMNAVEDGALSFPENSETTTVSDKLEMLYKPFYPVLNPVNSSQTILASSISAPKELKEPDQIKQSIKSPKLRRKNQQKRVVQYVTAAEGFCSDMWAWRKYGQKPIKGSPYPRSYYRCSSSKGCPARKQVERSPLDPGVFIVTYTSEHNHSRPTRRNSLAGSTRSNLTTPRKKTKSSQYSSKVLSPTTPLMASIEDEFVQNASLKKEEQQILVQETDKGNGIFNIDDIVLENELFPSLEDFEELASESAPLSGCFLDSLLENIPVPWFVDRSTATNDGH
>Jr09_16000_p1
MSQTQTSSLSQFRLSSSGDLAPGNADDSGHPGSNSAKYKLMSPAKLPISRSACITIPPGLSPTSFLESPVLLSNMKAEPSPTTGSFMKPQVIHGPASSAAHPGTTVCSNTDSFNERNPSFFEFKPHATSNMVPADLNHHRNEQSIQVQGQCHPHAFASSASVKNEMAVSSNELSLSAPIHMVTSGASAPAEVDSGELNHRGTPNTGFQASQSESKGGGISAVAERPSDDGYNWRKYGQKLVKGCEFPRSYYKCTHPNCEVKKLFERSHDGQITEIIYKGTHDHPKPQPSRRYTSGTMMTVQEERSDKAPSLTGRDEKSGIYGQTSHAVEPNGTPDLSPVMANDDSLDGAGSTPNRNNDDVEDDDLFSKRSRKMDIGGLDVTPVVKPIREPRVVVQTLSE…
>Jr09_16010_p1
MSQTQTSSLSQFRLSSSGDLAPGNADDSGHPGSNSAKYKLMSPAKLPISRSACITIPPGLSPTSFLESPVLLSNMKAEPSPTTGSFMKPQVIHGPASSAAHPGTTVCSNTDSFNERNPSFFEFKPHATSNMVPADLNHHRNEQSIQVQGQCHPHAFASSASVKNEMAVSSNELSLSAPIHMVTSGASAPAEVDSGELNHRGTPNTGFQASQSESKGGGISAVAERPSDDGYNWRKYGQKLVKGCEFPRSYYKCTHPNCEVKKLFERSHDGQITEIIYKGTHDHPKPQPSRRYTSGTMMTVQEERSDKAPSLTGRDEKSGIYGQTSHAVEPNGTPDLSPVMANDDSLDGAGSTPNRNNDDVEDDDLFSKRRKMDIGGLDVTPVVKPIREPRVVVQTLSEV…
>Jr10_01810_p1
MAEKEDSARVSSAPAPSRPTITLPPRPSMETFFTGGSGASPGPMTLVSSFFSDNYPDSGCRSFSQLLAGAMASPLARPSFYTENSTGNSTKEPGPDSVSGFKQSRPMNLVVSRSPLFTIPPGLTPSGLLNSPGFFSPLSPFGMSHQQALAQVTAQAALAQSQMLSEYQPSSVADPTESLTHNPSFTLSEASQMQMAPSTSDPRSSMMESSEASHSDMKYQPASIAIDKPADDGYNWRKYGQKQVKGSEYPRSYYKCTHLNCPVKKKVERSPDGQVTEIIYKGQHNHELPQPNRRAKEGSDLNVNIQAKSDLCPQSRAGNQNKSSETVSAYSVPQVDQESTGAGALKLPGSSDSEEEGDVEARGEGDLDEPNPKRRITDTGTSEVTLRHKTVTEPKIIVQ…
>Jr10_02340_p1
MPTPSCVVGLEERSFESVVAHQMISQDHQAAARQNIELESAKAEMGEVKEENERLKMMLDKIEKDYQSLQLCFFDIIKQEASKRCTESAPSHEQIDQESDQLVSLCLGRSTPSHELKRDEKGCNNPCNSKTIKDLEWKYNHNIGWESTEQLASSDPSSKEPNKQIVEAGDTWLPSKTLKTMRNGDDEISQQTHVKRARVSVRARCDTPTMNDGCHWRKYGQKISRGNPCPRAYYRCAVALECPVRKQVQRCAEDMSILITTYEGTHNHPLPMSATAMASATSAAASMLLSGSSISEPGLGSTTTTIAAPILNAFNLNLLDNSGAKRFYVPNSSLTTPLFPTVTLDLTAPPSPPHTLFNRSSSSFVSNPRFLSRSLSFSSSEPTIPTGWDSGYHGYTAVP…
>Jr10_04760_p1
MENYQMFFPCSSTGRQSSFPISTNMGSSNVFQKHLGVSSNGTFLGLGTENLLPKRSAEDVKQPADDQCCPVSSNGCSAGEESKGKQGKIKKIRKPRYAFQTRSQVDILDDGYRWRKYGQKAVKNNKFPRCFLLAEATIVVRFKIAV
>Jr10_04770_p1
MENYQMFFPCSSTGRQSSFPISTNMGSSNVFQKHLGVSSNGTFLGLGTENLLPKRSAEDVKQPADDQCCPVSSNGCSAGEESKGKQGKIKKIRKPRYAFQTRSQVDILDDGYRWRKYGQKAVKNNKFPRSYYRCTFQDCCVKKQVQRLTKDEGIVVTTYEGVHIHPIEKPTDNFEHILSQMQ
>Jr10_04790_p1
MENYQMFFPCSSTGRQSSFPISTNMGSSNVFQKHLGVSSNGTFLGLGTENLLPKRSAEDVKQPADDQCCPVSSNGCSAGEESKGKQGKIKKIRKPRYAFQTRSQVDILDDGYRWRKYGQKAVKNNKFPRCFLLAEATIVVRFKIAV
>Jr10_10930_p1
MSTTSQTMLNHGLLEDQDPVPPHMGFFPFPSNLTSLPPLGFHQSRSLKAFSTIPPSLASDAPSSNLSETFFSSATTKQREDITSPGCRGSQLLSLNRSSANLWAWGDVGESLTGKRGGGDLDHHHHHLGVSSMKMKKIKGRRKVREPRFCFKTMSDVDVLDDGYKWRKYGQKVVKNTQHPRSYYRCTQDNCRVKKRVERLAEDPRMVITTYEGRHAHSPSHDMEDQSQTPSHLNNFFW
>Jr10_11120_p1
MDDHYPHENPNLKPSYNYTHLTDGTITDPLSLDFELLQYLMLADHGIHDHDSTPKIRKASSENMIMTEEGSAESLTGATSRNDSINIGVKKAAEKMGVGHRVAFRTKSELEVMNDGYKWRKYGKKSVKSSPNPRNYYKCSSGGCNVKKRVEREREDPSYVITTYEGVHNHDTPSCSDHLLYYNHTPLMLSSACRTNLQPTTTTHYNNNNNNNNSSRSSSSS
>Jr10_11130_p1
MDDHYPHENPNLKPSYNYTHLTDGTITDPLSLDFELLQYLMLADHGIHDHDSTPKIRKASSENMIMTEEGSAESLTGATSRNDSICRNIGVKKAAEKMGVGHRVAFRTKSELEVMNDGYKWRKYGKKSVKSSPNPRNYYKCSSGGCNVKKRVEREREDPSYVITTYEGVHNHDTPSCSDHLLYYNHTPLMLSSACRTNLQPTTTTHYNNNNNNNNSSRSSSSS
>Jr10_13870_p1
MAKGSGLSVDSDPIGFFCHQPMVLNSFPEDNPGREPKWKLGAMDAALTSSAPPTIPFNLNWSRRQDSPSSSDNKRTVIDEVDFFAEKQGRDNKASSTDTDRKDSRDCPVALEFNVNTGLNLLTTNTSSDQSMVDDGLSPNVEDKRAKSELAVLQTEFKRMKTENQRLKEMIDQVSTNYNTLRMHFVTLMKAQTSKNPEESGILVDGKVDGKNNGSLIVPRQFMDLRLATNGDANNENSLSTLMEGRSREWNRSGSPGKTAEVMASEFIMSKSGNLNEELAFHQDKKEDGSKIGRGDRSPDQASQEWSPPNKVPRFNPPKDVLHDQTEAATMRKARVSVRARSEAPMITDGCQWRKYGQKMAKGNPCPRAYYRCTMANGCPVRKQVQRCAEDQTILVTTY…
>Jr10_25600_p1
MISSGERAPDAVVSDELQQRQSSGGGVPSQPIPDGRFHSSKQKCDDEIHAKQTEQEATTSSLIPEKASELPDAAVPTMQSDHEGSNSFIISEKALQAPDTSILVSQSGREGTTPSTIREKVTEDGYNWRKYGQKLVKGNEFIRSYYKCTNPTCQVKKQLERSHDGHIRDTTYFGQHDHPRPQLNVPVAVGFAVSISDERPSEPSLIGARDQPFIEHSQTSHHMEPVDAPPPSQPSRMRDGVDNDDHDHDTGSKRQKKEKCYVDAVPVDKPASEPRLVVQTLSEVDFVNDGYRWRKYGQKFVKGNPNPRSYYRCSSPGCPVKKHVERASHDPKVVIATYEGQHDHDMPPTRTVTHNTVGPNVFSVADNFEAGTKSEENNAVCLDMVIHTSSGPKFKSNEL…
>Jr11_16130_p1
MEIKRKQRAVMDGSLSLNPDKEISKELKPETQETSKRSCRKLVVQKNVVTVKIGANHVGKLKNEGPPSDFWSWRKYGQKPIKGSPYPRGYYRCSTTKGCSAKKQVERCRTDASMLIITYTSSHNHPGPNISDTNLIQPPKEPQNISTTEDDLPEPPKQEQQEEEKLNEPTMTTREKADPGENHFQYIQYSPISSSQDIIANQGEDPFTVHLEKSHETMGLLLDEEPLCYSQLMTFSTAISEENDFFDELEELPTYSSFISFMRSNFSEESIHAVPS
>Jr11_16150_p1
MEIKRKQRAVMDGSLSLNPDKEISKELKPETQETSKRRKLVVQKNVVTVKIGANHVGKLKNEGPPSDFWSWRKYGQKPIKGSPYPRGYYRCSTTKGCSAKKQVERCRTDASMLIITYTSSHNHPGPNISDTNLIQPPKEPQNISTTEDDLPEPPKQEQQEEEKLNEPTMTTREKADPGENHFQYIQYSPISSSQDIIANQGEDPFTVHLEKSHETMGLLLDEEPLCYSQLMTFSTAISEENDFFDELEELPTYSSFISFMRSNFSEESIHAVPS
>Jr11_16330_p1
MERNEVIKMEETIGSSLFSDHISEGYPFSGIFDFSEGEKNSLGFVELLGIQDYSPSLFDSPQAPSMAPSAPLPATTVKECSEVLNQPATPNSSSISSASSEAVNDEQTKAVDQEGEQQEKAKKQLKPKKTNQKRQREPRFAFMTKSEVDHLEDGYRWRKYGQKAVKNSPYPRSYYRCTTASCNVKKRVERSFTDPSIVVTTYEGKHSHPSPVMPRHSLAGVPPGSGISAGYAAASFDMPMARTLSYCQQLRQPSFINTSSPSNFASDGLILNPSGLRRDIRFCTPGSAFLRDHGLLQDIVPSHMLKEEDQ
>Jr11_17180_p1
KGLHNFYFVYPLVMENQHRREFTFLRSRDFLHHSNRGGTDPMVENSVEHRNPMIKEMDFFSPRTATLHNKHHPPHDDGHQYLERKNEASPTKVSDPSVNTGLNLLTVNSRMLRSSANHEEKLNTELITLQGELGRLHEENRKLRSMLDQITKSYSEMQGQLLMTMQNQAQQNREEQKVEPNGMSSHIMSAQRFMDTRPSAALDANIDPSNSDDKTQELSGSNTMEVMSKERDRSTGKQTGIHEQDGFDQSSQSWGSPKSPKLDKAKGEEQAPDHQVPLRKARVSVRARSEAPLISDGCQWRKYGQKMAKGNPCPRAYYRCTMGVGCPVRKQVQRSAEDKTILITTYEGNHNHPLPPAAMSMASTTSAAAAMLLSGSTTSKETLTNSGFFPSMPYASTMA…
>Jr11_17190_p1
MENQHRREFTFLRSRDFLHHSNRGGTDPMVENSVEHRNPMIKEMDFFSPRTATLHNKHHPPHDDGHQYLERKNEASPTKVSDPSVNTGLNLLTVNSRMLRSSANHEEKLNTELITLQGELGRLHEENRKLRSMLDQITKSYSEMQGQLLMTMQNQAQQNREEQVNIKVEPNGMSSHIMSAQRFMDTRPSAALDANIDPSNSDDKTQELSGSNTMEVMSKERDRSTGKQTGIHEQDGFDQSSQSWGSPKSPKLDKAKGEEQAPDHQVPLRKARVSVRARSEAPLISDGCQWRKYGQKMAKGNPCPRAYYRCTMGVGCPVRKQVQRSAEDKTILITTYEGNHNHPLPPAAMSMASTTSAAAAMLLSGSTTSKETLTNSGFFPSMPYASTMATLSASAPFPT…
>Jr11_30170_p1
MESSSLQHTSLDLNLNPFRPMKEEVPKKELAGVLARADDHQKEPIKEEAGFLAEEFDRISSENKKLTEMLAHMRENYNALQSHLMNLESNNSNKEYLVIPRKRKLADQRTDDPYGNIGVQGNIECSSCSDEESCKRSKELSYSNAKVSRVCVRTDASNTNLAVKDGYQWRKYGQKVTRDNPSPRAYFRCSYAPNCPVKKKVQRSVEDPSVLVATYEGEHNHMMPPSRAELSLGSSQCANLGSVSSVSSMRSSSRPTVTLDLIQTGLSEISNKNSIEGVEGSTFQQFLLQQMASSLTRDPKFTAALATAISGRILDFTLN
>Jr11_30180_p1
MEAQMSTTSNDQKAMETLQANSESLRKENETLRFMLGVMNRKCNILQARLQARKAEQIMDINLTHQSGSNNETNYKKARTQFPAPNSTSRILVRADSLDNSLIVKDGYQWRKYGQKVTKDNPSPRAYFRCSMAPGCPVKKKVQRCVEDKNVLVATYDGEHNHDANANSHDVGDQYSLSSSDRIGVAMTSSNSMHDISNHSPFRPAIALDLSLSGPNKENRRNYVEKDHQNNYYNKIEECVASLTKDPNFTASLAAAVARSMY
>Jr12_04410_p1
MEEDWDLQAVVRGCASTSATSSSSSSSTTTTAASFLGSFHSDSWISSFGGEDVGRLFSFPDPFEATHVSEELHELYKPFFPKSQPLSPQTSPISPLISSLSAFSASSKAKTQQQQQQQQQQPKQSQACSGTNPRSKRRKNLLKKVCQVPAEGLSSDIWAWRKYGQKPIKGSPYPRGYYRCSSSKGCLARKQVERNRSDPGMFIVTYTAEHNHPAPTHRNSLAGSTRQKPLTTQTVTAGESKKPNSAKPYSPANSMEDELALPQSTTTDSKEDSREEREDIVEEEEEDDEFGISDVALSDDFFVGLEGIVGPEAGDYFSDNLPATFVLPNWVTNNAG
>Jr12_04430_p1
MEGQDQPSSPPRPTPGLFPTQSPPFLFSTPSLIPSSFSSSLMHPPLDPHHDQVLDPEIFDWVSQLLSGVDQDQAVFTENIKPMRESASSIMAENGDVEEKGDYKDKRKVGRMKKAATRPKFAFQTRSTDDILDDGYRWRKYGQKAVKNSIYPRSYYRCTHHTCNVKKQVQRLCKDTSIVVTTYEGIHNHPCVKMMETLTPILKQIQFLSRF
>Jr12_10150_p1
MEKKQELKTENSMANSAFSDEIPGSLSLPSIFDMPCDQSHDHQKGLSLGFMDMLSIPADYNPSLFDLFSTPTMMPQPQVQPQQEQPLPSPASTVPESSEVVNTPATPNSSSISSSSNEGQTKAGGEEEDQDQEKTKKQLKPKKKNQKRQREPRFAFMTKSEVDHLDDGYRWRKYGQKAVKNSPYPRSYYRCTTAGCGVKKRVERSCDDSSIVVTTYEGQHKHPCPVTPRGGIGIATEAAGFSTFASPFVVPQPQYQQQQHPAYIYSLQPRLNVSTSTTNLNPSFPSFVQDQRRFGTSSATFLRDHGLLQDIVPSQTRKDQFKEEE
>Jr12_20670_p1
MDYSSWRISTCLDLNTNPTGGQVLDDVSNKEVESNFLGFGRKLSVKQESSGALEAEMKRVSAENKKLTEMLTVMCENYNALRSQLTDYMSKNLQEKEHTPTRKRKSDTCNNNNNNNNNNVAGIYGNSESSSTDEESCKKPREEIIKAKISRVYVKTEASDTSLTVKDGYQWRKYGQKVTRENPCPRAYFKCSFAPSCPVKKKVQRSAEDQSILVATYEGEHNHPNSSQLEATSGSTRCMTLGSHPGASASLRPSGPSVTLDLAKSKPSNDAKQSKSRIDSPEVGQFLVEQMASSLTKDPNFTAALARAISGRFLHQNPTEKW
>Jr12_25170_p1
MFRSKTSQTKQRTTSSETMEGQIESLIRHGCKVARELESNLPKLADNPNMLSKSCDEIIKAFGTAKERLYTQDPTAHDPRHMYLLREPQESQQPKIEASLQGWLRSSYTQTMDDMFQMQLQAERRPPFDMQESGSNAVLAAGLGGGEVEGSARSWSMGGDQLRPLDASDSGIGSSSQRQRRRKDDGERRTVKMAAPRIGNTEIPPEDGYTWRKYGQKEILGSRFPRSYYRCTHQKLYQCPAKKQVQRLDDDPSTFEVTYRADHTCHMSSTAPSLIPPLPLTATEITHEMAQTITTQPPQSNSVPLSKWLSMEHFSLRTGAVSSTSGMVVGGGAGPSTSRSGKEVECPVADMADAMFNSGSSSSNSMDWLLGDKWESEDKEGK
>Jr13_05050_p1
QFCLVLMGREKERDHRMEIDLSLKVDIADHEEQQAVEKEVDRAGVQDKGKGYHDDEQAQAPNDHRQDQPGIHVRDAEEAAEATTGEVDDDASVSDQVSLQENMRTKELSLLRMEMNRVKEENKVLRNVVEQTMKDYYDLQMKFATVQQNNQKKDPQIFLSLNGNHGIDSQEPKTILNTPDITKERPPSPSHKDGLRESELGLSLRLHTGAEEQRVEDKDQENKEEVKSFTTVQNKLQRSTDLTGIASHVASPVNRKARVSVRARCEAATMNDGCQWRKYGQKIAKGNPSCPRAYYRCTVAPGCPVRKQVQRCLEDMSILITTYEGTHNHPLPVGATAMASTASAAASFMLLDSSNPLSDAAASSFTRVSLPNYGLHGSHMIHSSDLNPSNIRTMNPINI…
>Jr13_12290_p1
MDSYQTFFSCSSATPPASSLSLNMADSHAHNEFQGSKTNGFFGLMSEMDQLPVSNANNVPQSRSLFVGSESTDDDVKLAGKKNVGKKVRKPRYAFQTRSQVDILDDGYRWRKYGQKAVKNNKFPRSYYRCTYQGCSVKKQVQRLTKDEGIVVTTYEGMHSHPIEKSTDNFEHILSQMQIYASF
>Jr13_14610_p1
MDEGDKSDPGPEFTSNSSWPLGPDPDSVYFFANDRESSILGEFGWNFQPDDPDRAGLHDGSDLTGSFGFQDHDQDHDHSNKSSDCALQSSDPALPVRSDSKVRGDLTASSNPSVSSSSSEDPPEKSTGSGGKPPEIPNKVRKKGQKRIRQPRFAFMTKSEVDQLEDGYRWRKYGQKAVKNSPFPRSYYRCTNSRCTVKKRVERSSEDRTIVITTYEGQHCHHTVGFPRGGVNISHETFTGQLAPPGSQFYYPAVQLPQQSPSFRMIQSQQIPAGESHSMPEPSTPQFPTDEGLLGDMVPPNMRNR
>Jr13_14850_p1
MADNEDPAPPLLPSTSSPPPSSSLPSKSTALSLPSRPTISLPPRSTMETIFNGAGGGLAGLGFSPGPMTLVSSFFSDNDECRSFSQLLAGAMASPAAIPSQLHRQSFPAPDELNSTGRDDDFRFKQNRPPGLAIAQPKFFTVPPGMSPAGLLDSPGLFSPGQGSFGMTHQQALAQVTAQAAQSHSHLHVQTDYPSSLSTAPTTSSTQLSTFTTNTTAHQQSPSIPDSGVAVNESSDFSHSEQRSQPSSFAADKPAEDGYNWRKYGQKQVKGSEFPRSYYKCSHPNCPVKKKVERSLDGQVTEIIYKGQHNHQPPQNNKRAKDTGNPSGNSTIQGNPGLASQVQSGTLNKLKEGIAPCSMSKKDQESSQATPEHLSGTSDSEEVGDTETGVDEKDEDEPD…
>Jr13_16070_p1
MPSSPSRKNLNSVKQVPCAMEKNTKDLLSNSTRKNQEEQLKLAEAEMEEVKGENERLKLLLARIAKDYQTLQMHFFDILQQEKTKYTDTASSNQPKEEPEVLVSLSLGITSTDQKVGKDDKKNSNLSNGRLENEKLSGELSLGLDCISEPSSTENMRNASSKNSIDQELKEEQPTEIWPPNKILKTVRSGDDEVLEQGPLKKARVSVRARCDTPTMNDGCQWRKYGQKIAKGNPCPRGYYRCTVSPSCPVRKQVQRCADDMSILITTYEGTHDHPLPVSAAAMASTTSAAVSMLQSRSSSSTGIGISASVPISSSMATNLHGFNFSTLSQTSRPPQFYIPNSSISTSNSHPTVTLDLTSTAPSTSSPLGRFSSSFSSTVPRYSSTCLNFSSSSSACLEP…
>Jr13_30130_p1
MGDWEQKNLKNELTQGRELARQLQSHLNAPSSSQESREILVQKILASYETALSMLRWSSSDQPQPLRGAIRTSESPPSDLVGSPRSEDSDRDLKNPEHRDISSRKRKALPTWTQQVRVSPGMELDQGRLDDGFSWRKYGQKEILNARYPRGYYRCTNRSVQGCLATKQVQRSGEDPTMFAITYRGRHTCAQASNIILPSPPSLENQEPNNHSMLDLQPHDRQPQQLIQQLHHGSQEMLLNLQASLKVETENLDTHDGRSFPSLFDFPSTSNIEAETQKYFPDSVLIDNNFVGSYSPSFRSPAISETNYFSVMSPSGMSMNSFGLVRHQHFQGCDQSELTQEQISSVATSATNSPTVGLDFPFGTPEFDADFTFDNPGFFS
>Jr13_30630_p1
MADDWDLHAVVRSCKSAATKNSIATNTNTNTSIAAASEDPLACLASLTFEEENDLLSFPLLAEPRTNAFHELQELCKSFFPTTTTSTATTTTSHRIISPNSSSISDVQRRRHPVQPNPTISAARSRFKPEPSASSSSGLGGVQDQQQRRHAQQQPQQQNQPYQQRQQVNQQEFQRPRASSAMSLPAAMQSQAPRSRKRKSQQKRTVCHVTAENLSADMWAWRKYGQKPIKGSPYPRNYYRCSSSKGCPARKQVERSNIDPNIFIVTYTGDHSHPRPTHRNSLSGSTRNKCSTSGVMSTDKDNSGSPITANAASCSSPQSTTNLSPTTQLTVQTDEEAVITNKNSNEDNKIMVDANDKERKEMADDADDDDDDDDDQEDDDQILIPNMAMTEDIFMGLQQ…
>Jr14_02960_p1
MEEDQRGSAPNYELQVSFSTTPQAIPEMGFVQFEDNQVLSFLAPSQSSQISQPLSGGGTTTTATTSTGVTSNTNPTNMGFSHNDLVTRSSWNNDQVGTMDPKAVNDENCTGNASDGNNSWWRSSNSDKSKVKVRRKLREPRFCFQTRSDVDVLDDGYKWRKYGQKVVKNSLHPRSYYRCTHNNCRVKKRVERLSEDCRMVITTYEGRHNHSPCDDSNSSEHECFTSF
>Jr14_08090_p1
MASSSGSLETSANSHPTSFTFSTTHPFMTTSFSGLLASAYDGEHQNTTTIGIENKHRGLSDRVAQRTGSGVPKFKSIPPPSLPISPPAVSPSSYFAIPDGLSPAELLDSPVLLNTRNILPSPTTGTFPAQTFAWKSNSGNRQNVKQEDKNYDFSFQTQQRPPLTSSTTNFQSSSATIQTNFQAQQQPWSFHEPTKQDDFSSAKMVKPELSSMQSYSPEIATIQTNTQINGNGNGGFQSDGGNYHGQQAQSVSRRSDDGYNWRKYGQKQVKGSENPRSYYKCTHPNCPTKKKVERSIDGHITEIVYKGSHNHAKPQSTRRSSSSSSASSYVIQASNSALTDIPDQSFATHGNGHTDSVATPENSSISMGDEDFDQSSQKSKSGGDEFDEDEPNSKRWKKE…
>Jr14_08100_p1
MASSSGSLETSANSHPTSFTFSTTHPFMTTSFSGLLASAYDGEHQNTTTIGIENKHRGLSDRVAQRTGSGVPKFKSIPPPSLPISPPAVSPSSYFAIPDGLSPAELLDSPVLLNTRNILPSPTTGTFPAQTFAWKSNSGNRQNVKQEDKNYDFSFQTQQRPPLTSSTTNFQSSSATIQTAQQQPWSFHEPTKQDDFSSAKMVKPELSSMQSYSPEIATIQTNTQINGNGNGGFQSDGGNYHGQQAQSVSRRSDDGYNWRKYGQKQVKGSENPRSYYKCTHPNCPTKKKVERSIDGHITEIVYKGSHNHAKPQSTRRSSSSSSASSYVIQASNSALTDIPDQSFATHGNGHTDSVATPENSSISMGDEDFDQSSQKSKSGGDEFDEDEPNSKRWKKEGEN…
>Jr14_22100_p1
MSDASHSRQPSMEIDQDGYRDQDDQQDIDGRGYRLVLPEDGYEWKKYGQKFIKNIGKVRSYFKCQRSNCGAKKRADWSTSEAGSLRVVYDGLHSHSQSDDLHHHGTTTTSSSSSNSMSTRSTANQYDLLTQVFGDHRSLTNNSHHDDHHQHHHQN
>Jr15_12650_p1
MAENGSSEALHVENPKPHEEEEEDDNEEEVEEEAEEEESDDSEDVEEEREDEARLGESQLSNLRGSVRHGEAELQESRLETLAAPSSLQLSQDDQGLRENSTSRAAGGAESEDQLPQQEVVATLTAQPADALTQHKSQVSLCPTSSELSPTSVTQSILPLSSPTLREQRLSQAKGNTECMPKTDQQSSSDLKSLSLVPVTKTPSSDGYNWRKYGQKQVKSPKGSRSYYRCTFSECCAKKIECSDHSGHIIDIIYKSQHGHDPPRKFSCTKENKLASSAKPVMGNSFAERPIQMPNESEPLKVSEETIQETSPNPERKRQNSSDSNGNCEIKVKEEHANEPEPKRRVKKGDLAHSGSVIKPGKKPKFVVHAAGDVGISGDGYRWRKYGQKMVKGNPHPRN…
>Jr15_12660_p1
MPKTDQQSSSDLKSLSLVPVTKTPSSDGYNWRKYGQKQVKSPKGSRSYYRCTFSECCAKKIECSDHSGHIIDIIYKSQHGHDPPRKFSCTKENKLASSAKPVMGNSFAERPIQMPNESEPLKVSEETIQETSPNPERKRQNSSDSNGNCEIKVKEEHANEPEPKRRVKKGDLAHSGSVIKPGKKPKFVVHAAGDVGISGDGYRWRKYGQKMVKGNPHPRNYYRCTSAGCPVRKHIETAVDNASAVIITYKGVHDHDMPVPKKRHGPPSAPLVAAAAPASMSNLQLKKTDKLHNQSSSTQWSVDTEGELTGEAMELGGEKAMESARTLLSIGFEIKPC
>Jr15_12670_p1
MAENGSSEALHVENPKPHEEEEEDDNEEEVEEEAEEEESDDSEDVEEEREDEARLGESQLSNLRGSVRHGEAELQESRLETLAAPSSLQLSQDDQGAGLRENSTSRAAGGAESEDQLPQQEVVATLTAQPADALTQHKSQVSLCPTSSELSPTSVTQSILPLSSPTLREQRLSQAKGNTECMPKTDQQSSSDLKSLSLVPVTKTPSSDGYNWRKYGQKQVKSPKGSRSYYRCTFSECCAKKIECSDHSGHIIDIIYKSQHGHDPPRKFSCTKENKLASSAKPVMGNSFAERPIQMPNESEPLKVSEETIQETSPNPERKRQNSSDSNGNCEIKVKEEHANEPEPKRRVKKGDLAHSGSVIKPGKKPKFVVHAAGDVGISGDGYRWRKYGQKMVKGNPHP…
>Jr16_00890_p1
MENMGDWEQKNLINELTQGRELARQLHSHLTTASSSHETREFLVQKILASYEKSLLMLRWSSSVGEPQPIAGAVRNSESPPSQVGSPRSEDSDRDIRDLDHKSDAPRKRKALPRWTQQVRVSPGMGLEGPLDDGFSWRKYGQKDILNAKYPRGYYRCTHRHVQGCLATKQVQRSDEDPTIFEITYRGRHTCSQASNIMPPQASPEIVLQEPNDVMDLQHLNPQPQQQHDHHEPVLSQELMLLNFQANLKVQTGNLDTHHAGQSFPSFIFPSSSTFEAADHHHHPTPEQQAHVFPASMIDNNFVGSYSPSFMSPETSGTNYFSASPGGMNITGFPADQQRHFQSSESELTEIISAATSATNSPTVGLDFPFGPKFDPNFSFDNHGFFS
>Jr16_12390_p1
MAQNEHSAPPASATVPSVLEPSKSTVPSSSSSSSLSSLPTITLPPRSSFDTIFNGGGGGPGLAGLDFSPGPMTLVSSFFSDTDDCRSFSQLLAGAMAPPADIPSRRLPSVPAPEESNSRARDDDFRFGQNRPPGLAFSQPPIFTVPPGTSSAGFLDSPGLFSPGQGPFGTTQQQALAQVASQIAQIQSHLRIQSDYSSSLSTATTTSLSTQLPPFTTDTTAHQQAPPSIPDSDVTVNESSDFSQPCSFVVDKVDEDGYNWRKYGQKQVKGSEFPRSYYKCTHPKCPVKKKVERSLDGQITEIIYKGQHNHQLPQNNKRGKDTGNSMAPYSMSKKDHESSQATPEHLFGTSDNEEVGDAETGVDEKDEDEPDPKRRSTEFKVSEPAISHRTLAEPRIVVQ…
>Jr16_12590_p1
NKVRKKGQKRVQQPRFAFVTKSEVDHLEDGYRWRKYGQKAVKNSPFPRSYYRCTNSRCTVKKRVERSSEDPTVIITTYEGQHCHHTVLGFPRSGHGVINIHDDQNFISSTSTTTAGQLGAAPPVSQLYYPKVLHELPKDQNPFSTIQYNYSTHHHQQSIPHHEVGKISHAVPEPIPLQLAPTDEGLLGDMVPPNMRNRS
>Jr16_14290_p1
MESYPTYFSCSSATPAASSSLSLNMANSHAYNEFQGSKSNGFLGLMSEMDVPVSNTNDNNPQSRNCVGSETDHHAKLGKKKGEKKVRKPRYAFQTRSQVDILDDGYRWRKYGQKAVKNNKYPRSYYRCTHQGCNVKKQVQRLTKDEGIVVTTYEGMHSHPIERSTDNFEHILSQMQIYTTF
>Jr16_19690_p1
MAMEIDLSLKLHAKEFHAADHHELVLVDREKDREDQKEKEKQDHEQAPQTKDHDFRDAKLDQAVVVLLDDHQATAGDHQVDDDALIMEVSMEQTKEFSLLRKEMNRMKEENKVLRNTVEQTLKDYNDLQTKLARIQQNNQDMKDPQIFLLLHGNDHNDSTQDQPKTVANNILDITPKRLPSPSHKDGIRESELGLSLRLHTDSEEQDHRVLLEDKEDNKEELATFATVQNKLQYRNDHLPAGITSHVASPANRKARVSVRVRCEAATMNDGCQWRKYGQKIAKGNPCPRAYYRCTVAPGCPVRKQVQRCLEDMSILVTTYEGTHNHPLPVGATAMASTTSAAASFMLLDSSNPLSNGTSNFTQVSLPNYHGSHMGNPSNSHLSNIRSINPNDPSKGIVL…
