# Supplementary material for: Genome-Wide Identification and Transcriptional Expression Profiles of Transcription Factor WRKY in Common Walnut (Juglans regia L.)
Source: Genes (Basel). 2021 Sep 19;12(9):1444. doi: 10.3390/genes12091444 (PMC8466090; doi:10.3390/genes12091444)
Supplement: Supplementary file 1 [file genes-12-01444-s001.zip › TableS4.xlsx]

## Sheet: Sheet1
TableS4. The gene structure information of WRKY genes.
Chr	Type	Start	End	Stand	Gene
Chr01	mRNA	2253938	2258097	+	ID=Jr01_03140_p1;Parent=Jr01_03140
Chr01	exon	2253938	2254575	+	ID=Jr01_03140_p1.exon1;Parent=Jr01_03140_p1
Chr01	five_prime_utr	2253938	2254161	+	ID=Jr01_03140_p1.utr5;Parent=Jr01_03140_p1
Chr01	mRNA	2254162	2257520	+	ID=Jr01_03150_p1;Parent=Jr01_03150
Chr01	exon	2254162	2254575	+	ID=Jr01_03150_p1.exon1;Parent=Jr01_03150_p1
Chr01	CDS	2254162	2254575	+	ID=cds.Jr01_03140_p1;Parent=Jr01_03140_p1
Chr01	CDS	2254162	2254575	+	ID=cds.Jr01_03150_p1;Parent=Jr01_03150_p1
Chr01	exon	2255527	2256242	+	ID=Jr01_03140_p1.exon2;Parent=Jr01_03140_p1
Chr01	exon	2255527	2256242	+	ID=Jr01_03150_p1.exon2;Parent=Jr01_03150_p1
Chr01	CDS	2255527	2256242	+	ID=cds.Jr01_03140_p1;Parent=Jr01_03140_p1
Chr01	CDS	2255527	2256242	+	ID=cds.Jr01_03150_p1;Parent=Jr01_03150_p1
Chr01	exon	2256348	2256506	+	ID=Jr01_03140_p1.exon3;Parent=Jr01_03140_p1
Chr01	exon	2256348	2256506	+	ID=Jr01_03150_p1.exon3;Parent=Jr01_03150_p1
Chr01	CDS	2256348	2256506	+	ID=cds.Jr01_03140_p1;Parent=Jr01_03140_p1
Chr01	CDS	2256348	2256506	+	ID=cds.Jr01_03150_p1;Parent=Jr01_03150_p1
Chr01	exon	2256901	2256970	+	ID=Jr01_03150_p1.exon4;Parent=Jr01_03150_p1
Chr01	CDS	2256901	2256970	+	ID=cds.Jr01_03150_p1;Parent=Jr01_03150_p1
Chr01	exon	2257500	2258097	+	ID=Jr01_03140_p1.exon4;Parent=Jr01_03140_p1
Chr01	CDS	2257500	2257770	+	ID=cds.Jr01_03140_p1;Parent=Jr01_03140_p1
Chr01	exon	2257500	2257520	+	ID=Jr01_03150_p1.exon5;Parent=Jr01_03150_p1
Chr01	CDS	2257500	2257520	+	ID=cds.Jr01_03150_p1;Parent=Jr01_03150_p1
Chr01	three_prime_UTR	2257771	2258097	+	ID=Jr01_03140_p1.utr3;Parent=Jr01_03140_p1
Chr01	mRNA	2845855	2846322	+	ID=Jr01_03780_p1;Parent=Jr01_03780
Chr01	exon	2845855	2845863	+	ID=Jr01_03780_p1.exon1;Parent=Jr01_03780_p1
Chr01	CDS	2845855	2845863	+	ID=cds.Jr01_03780_p1;Parent=Jr01_03780_p1
Chr01	exon	2845933	2846105	+	ID=Jr01_03780_p1.exon2;Parent=Jr01_03780_p1
Chr01	CDS	2845933	2846105	+	ID=cds.Jr01_03780_p1;Parent=Jr01_03780_p1
Chr01	exon	2846190	2846322	+	ID=Jr01_03780_p1.exon3;Parent=Jr01_03780_p1
Chr01	CDS	2846190	2846322	+	ID=cds.Jr01_03780_p1;Parent=Jr01_03780_p1
Chr01	mRNA	4633833	4635698	-	ID=Jr01_06810_p1;Parent=Jr01_06810
Chr01	exon	4633833	4634010	-	ID=Jr01_06810_p1.exon2;Parent=Jr01_06810_p1
Chr01	CDS	4633833	4634010	-	ID=cds.Jr01_06810_p1;Parent=Jr01_06810_p1
Chr01	exon	4635310	4635698	-	ID=Jr01_06810_p1.exon1;Parent=Jr01_06810_p1
Chr01	CDS	4635310	4635698	-	ID=cds.Jr01_06810_p1;Parent=Jr01_06810_p1
Chr01	mRNA	13357882	13361835	-	ID=Jr01_15550_p1;Parent=Jr01_15550
Chr01	exon	13357882	13358053	-	ID=Jr01_15550_p1.exon3;Parent=Jr01_15550_p1
Chr01	CDS	13357882	13358053	-	ID=cds.Jr01_15550_p1;Parent=Jr01_15550_p1
Chr01	exon	13361178	13361408	-	ID=Jr01_15550_p1.exon2;Parent=Jr01_15550_p1
Chr01	CDS	13361178	13361408	-	ID=cds.Jr01_15550_p1;Parent=Jr01_15550_p1
Chr01	exon	13361540	13361835	-	ID=Jr01_15550_p1.exon1;Parent=Jr01_15550_p1
Chr01	CDS	13361540	13361835	-	ID=cds.Jr01_15550_p1;Parent=Jr01_15550_p1
Chr01	mRNA	13753426	13757429	+	ID=Jr01_15790_p1;Parent=Jr01_15790
Chr01	mRNA	13753426	13757429	+	ID=Jr01_15800_p1;Parent=Jr01_15790
Chr01	exon	13753426	13753658	+	ID=Jr01_15790_p1.exon1;Parent=Jr01_15790_p1
Chr01	exon	13753426	13753658	+	ID=Jr01_15800_p1.exon1;Parent=Jr01_15800_p1
Chr01	CDS	13753426	13753658	+	ID=cds.Jr01_15790_p1;Parent=Jr01_15790_p1
Chr01	CDS	13753426	13753658	+	ID=cds.Jr01_15800_p1;Parent=Jr01_15800_p1
Chr01	exon	13753784	13753933	+	ID=Jr01_15800_p1.exon2;Parent=Jr01_15800_p1
Chr01	CDS	13753784	13753933	+	ID=cds.Jr01_15800_p1;Parent=Jr01_15800_p1
Chr01	exon	13753787	13753933	+	ID=Jr01_15790_p1.exon2;Parent=Jr01_15790_p1
Chr01	CDS	13753787	13753933	+	ID=cds.Jr01_15790_p1;Parent=Jr01_15790_p1
Chr01	exon	13757222	13757429	+	ID=Jr01_15790_p1.exon3;Parent=Jr01_15790_p1
Chr01	exon	13757222	13757429	+	ID=Jr01_15800_p1.exon3;Parent=Jr01_15800_p1
Chr01	CDS	13757222	13757429	+	ID=cds.Jr01_15790_p1;Parent=Jr01_15790_p1
Chr01	CDS	13757222	13757429	+	ID=cds.Jr01_15800_p1;Parent=Jr01_15800_p1
Chr01	mRNA	17353188	17356096	+	ID=Jr01_18750_p1;Parent=Jr01_18750
Chr01	exon	17353188	17353566	+	ID=Jr01_18750_p1.exon1;Parent=Jr01_18750_p1
Chr01	five_prime_utr	17353188	17353452	+	ID=Jr01_18750_p1.utr5;Parent=Jr01_18750_p1
Chr01	CDS	17353453	17353566	+	ID=cds.Jr01_18750_p1;Parent=Jr01_18750_p1
Chr01	exon	17353668	17353769	+	ID=Jr01_18750_p1.exon2;Parent=Jr01_18750_p1
Chr01	CDS	17353668	17353769	+	ID=cds.Jr01_18750_p1;Parent=Jr01_18750_p1
Chr01	exon	17353888	17354454	+	ID=Jr01_18750_p1.exon3;Parent=Jr01_18750_p1
Chr01	CDS	17353888	17354454	+	ID=cds.Jr01_18750_p1;Parent=Jr01_18750_p1
Chr01	exon	17354562	17354675	+	ID=Jr01_18750_p1.exon4;Parent=Jr01_18750_p1
Chr01	CDS	17354562	17354675	+	ID=cds.Jr01_18750_p1;Parent=Jr01_18750_p1
Chr01	exon	17355208	17356096	+	ID=Jr01_18750_p1.exon5;Parent=Jr01_18750_p1
Chr01	CDS	17355208	17355966	+	ID=cds.Jr01_18750_p1;Parent=Jr01_18750_p1
Chr01	three_prime_UTR	17355967	17356096	+	ID=Jr01_18750_p1.utr3;Parent=Jr01_18750_p1
Chr01	mRNA	27756878	27759839	+	ID=Jr01_22930_p1;Parent=Jr01_22930
Chr01	exon	27756878	27757471	+	ID=Jr01_22930_p1.exon1;Parent=Jr01_22930_p1
Chr01	CDS	27756879	27757471	+	ID=cds.Jr01_22930_p1;Parent=Jr01_22930_p1
Chr01	exon	27757964	27758107	+	ID=Jr01_22930_p1.exon2;Parent=Jr01_22930_p1
Chr01	CDS	27757964	27758107	+	ID=cds.Jr01_22930_p1;Parent=Jr01_22930_p1
Chr01	exon	27759323	27759839	+	ID=Jr01_22930_p1.exon3;Parent=Jr01_22930_p1
Chr01	CDS	27759323	27759677	+	ID=cds.Jr01_22930_p1;Parent=Jr01_22930_p1
Chr01	three_prime_UTR	27759678	27759839	+	ID=Jr01_22930_p1.utr3;Parent=Jr01_22930_p1
Chr02	mRNA	764418	766023	+	ID=Jr02_00640_p1;Parent=Jr02_00640
Chr02	exon	764418	764698	+	ID=Jr02_00640_p1.exon1;Parent=Jr02_00640_p1
Chr02	CDS	764418	764698	+	ID=cds.Jr02_00640_p1;Parent=Jr02_00640_p1
Chr02	exon	765843	766023	+	ID=Jr02_00640_p1.exon2;Parent=Jr02_00640_p1
Chr02	CDS	765843	766023	+	ID=cds.Jr02_00640_p1;Parent=Jr02_00640_p1
Chr02	mRNA	4981792	4986534	+	ID=Jr02_04990_p1;Parent=Jr02_04990
Chr02	exon	4981792	4981952	+	ID=Jr02_04990_p1.exon1;Parent=Jr02_04990_p1
Chr02	five_prime_utr	4981792	4981826	+	ID=Jr02_04990_p1.utr5;Parent=Jr02_04990_p1
Chr02	CDS	4981827	4981952	+	ID=cds.Jr02_04990_p1;Parent=Jr02_04990_p1
Chr02	exon	4982783	4982869	+	ID=Jr02_04990_p1.exon2;Parent=Jr02_04990_p1
Chr02	CDS	4982783	4982869	+	ID=cds.Jr02_04990_p1;Parent=Jr02_04990_p1
Chr02	exon	4983714	4984274	+	ID=Jr02_04990_p1.exon3;Parent=Jr02_04990_p1
Chr02	CDS	4983714	4984274	+	ID=cds.Jr02_04990_p1;Parent=Jr02_04990_p1
Chr02	exon	4984384	4984497	+	ID=Jr02_04990_p1.exon4;Parent=Jr02_04990_p1
Chr02	CDS	4984384	4984497	+	ID=cds.Jr02_04990_p1;Parent=Jr02_04990_p1
Chr02	exon	4985437	4986534	+	ID=Jr02_04990_p1.exon5;Parent=Jr02_04990_p1
Chr02	CDS	4985437	4986378	+	ID=cds.Jr02_04990_p1;Parent=Jr02_04990_p1
Chr02	three_prime_UTR	4986379	4986534	+	ID=Jr02_04990_p1.utr3;Parent=Jr02_04990_p1
Chr02	mRNA	29671441	29672723	+	ID=Jr02_16420_p1;Parent=Jr02_16420
Chr02	exon	29671441	29671766	+	ID=Jr02_16420_p1.exon1;Parent=Jr02_16420_p1
Chr02	CDS	29671441	29671766	+	ID=cds.Jr02_16420_p1;Parent=Jr02_16420_p1
Chr02	exon	29671850	29671978	+	ID=Jr02_16420_p1.exon2;Parent=Jr02_16420_p1
Chr02	CDS	29671850	29671978	+	ID=cds.Jr02_16420_p1;Parent=Jr02_16420_p1
Chr02	exon	29672099	29672723	+	ID=Jr02_16420_p1.exon3;Parent=Jr02_16420_p1
Chr02	CDS	29672099	29672723	+	ID=cds.Jr02_16420_p1;Parent=Jr02_16420_p1
Chr02	mRNA	30433920	30435516	-	ID=Jr02_17180_p1;Parent=Jr02_17180
Chr02	exon	30433920	30434947	-	ID=Jr02_17180_p1.exon2;Parent=Jr02_17180_p1
Chr02	three_prime_UTR	30433920	30434331	-	ID=Jr02_17180_p1.utr3;Parent=Jr02_17180_p1
Chr02	mRNA	30434051	30435516	-	ID=Jr02_17190_p1;Parent=Jr02_17190
Chr02	exon	30434051	30434944	-	ID=Jr02_17190_p1.exon2;Parent=Jr02_17190_p1
Chr02	three_prime_UTR	30434051	30434331	-	ID=Jr02_17190_p1.utr3;Parent=Jr02_17190_p1
Chr02	CDS	30434332	30434947	-	ID=cds.Jr02_17180_p1;Parent=Jr02_17180_p1
Chr02	CDS	30434332	30434944	-	ID=cds.Jr02_17190_p1;Parent=Jr02_17190_p1
Chr02	exon	30435087	30435516	-	ID=Jr02_17180_p1.exon1;Parent=Jr02_17180_p1
Chr02	exon	30435087	30435516	-	ID=Jr02_17190_p1.exon1;Parent=Jr02_17190_p1
Chr02	CDS	30435087	30435406	-	ID=cds.Jr02_17180_p1;Parent=Jr02_17180_p1
Chr02	CDS	30435087	30435406	-	ID=cds.Jr02_17190_p1;Parent=Jr02_17190_p1
Chr02	five_prime_utr	30435407	30435516	-	ID=Jr02_17180_p1.utr5;Parent=Jr02_17180_p1
Chr02	five_prime_utr	30435407	30435516	-	ID=Jr02_17190_p1.utr5;Parent=Jr02_17190_p1
Chr02	mRNA	36922783	36929192	+	ID=Jr02_25510_p1;Parent=Jr02_25510
Chr02	exon	36922783	36923092	+	ID=Jr02_25510_p1.exon1;Parent=Jr02_25510_p1
Chr02	five_prime_utr	36922783	36922855	+	ID=Jr02_25510_p1.utr5;Parent=Jr02_25510_p1
Chr02	CDS	36922856	36923092	+	ID=cds.Jr02_25510_p1;Parent=Jr02_25510_p1
Chr02	mRNA	36924108	36928718	+	ID=Jr02_25520_p1;Parent=Jr02_25520
Chr02	exon	36924108	36924122	+	ID=Jr02_25520_p1.exon1;Parent=Jr02_25520_p1
Chr02	CDS	36924108	36924122	+	ID=cds.Jr02_25520_p1;Parent=Jr02_25520_p1
Chr02	exon	36924752	36924916	+	ID=Jr02_25510_p1.exon2;Parent=Jr02_25510_p1
Chr02	exon	36924752	36924916	+	ID=Jr02_25520_p1.exon2;Parent=Jr02_25520_p1
Chr02	CDS	36924752	36924916	+	ID=cds.Jr02_25510_p1;Parent=Jr02_25510_p1
Chr02	CDS	36924752	36924916	+	ID=cds.Jr02_25520_p1;Parent=Jr02_25520_p1
Chr02	exon	36925813	36926365	+	ID=Jr02_25510_p1.exon3;Parent=Jr02_25510_p1
Chr02	exon	36925813	36926365	+	ID=Jr02_25520_p1.exon3;Parent=Jr02_25520_p1
Chr02	CDS	36925813	36926365	+	ID=cds.Jr02_25510_p1;Parent=Jr02_25510_p1
Chr02	CDS	36925813	36926365	+	ID=cds.Jr02_25520_p1;Parent=Jr02_25520_p1
Chr02	exon	36926506	36926665	+	ID=Jr02_25510_p1.exon4;Parent=Jr02_25510_p1
Chr02	exon	36926506	36926665	+	ID=Jr02_25520_p1.exon4;Parent=Jr02_25520_p1
Chr02	CDS	36926506	36926665	+	ID=cds.Jr02_25510_p1;Parent=Jr02_25510_p1
Chr02	CDS	36926506	36926665	+	ID=cds.Jr02_25520_p1;Parent=Jr02_25520_p1
Chr02	exon	36926751	36926909	+	ID=Jr02_25510_p1.exon5;Parent=Jr02_25510_p1
Chr02	exon	36926751	36926909	+	ID=Jr02_25520_p1.exon5;Parent=Jr02_25520_p1
Chr02	CDS	36926751	36926909	+	ID=cds.Jr02_25510_p1;Parent=Jr02_25510_p1
Chr02	CDS	36926751	36926909	+	ID=cds.Jr02_25520_p1;Parent=Jr02_25520_p1
Chr02	exon	36928211	36929192	+	ID=Jr02_25510_p1.exon6;Parent=Jr02_25510_p1
Chr02	exon	36928211	36928718	+	ID=Jr02_25520_p1.exon6;Parent=Jr02_25520_p1
Chr02	CDS	36928211	36928718	+	ID=cds.Jr02_25510_p1;Parent=Jr02_25510_p1
Chr02	CDS	36928211	36928718	+	ID=cds.Jr02_25520_p1;Parent=Jr02_25520_p1
Chr02	three_prime_UTR	36928719	36929192	+	ID=Jr02_25510_p1.utr3;Parent=Jr02_25510_p1
Chr02	mRNA	37813885	37818221	+	ID=Jr02_26760_p1;Parent=Jr02_26760
Chr02	exon	37813885	37814193	+	ID=Jr02_26760_p1.exon1;Parent=Jr02_26760_p1
Chr02	five_prime_utr	37813885	37814193	+	ID=Jr02_26760_p1.utr5;Parent=Jr02_26760_p1
Chr02	exon	37814796	37815327	+	ID=Jr02_26760_p1.exon2;Parent=Jr02_26760_p1
Chr02	five_prime_utr	37814796	37814874	+	ID=Jr02_26760_p1.utr5;Parent=Jr02_26760_p1
Chr02	CDS	37814875	37815327	+	ID=cds.Jr02_26760_p1;Parent=Jr02_26760_p1
Chr02	exon	37815936	37816124	+	ID=Jr02_26760_p1.exon3;Parent=Jr02_26760_p1
Chr02	CDS	37815936	37816124	+	ID=cds.Jr02_26760_p1;Parent=Jr02_26760_p1
Chr02	exon	37816336	37817213	+	ID=Jr02_26760_p1.exon4;Parent=Jr02_26760_p1
Chr02	CDS	37816336	37817213	+	ID=cds.Jr02_26760_p1;Parent=Jr02_26760_p1
Chr02	exon	37817305	37817463	+	ID=Jr02_26760_p1.exon5;Parent=Jr02_26760_p1
Chr02	CDS	37817305	37817463	+	ID=cds.Jr02_26760_p1;Parent=Jr02_26760_p1
Chr02	exon	37817563	37818221	+	ID=Jr02_26760_p1.exon6;Parent=Jr02_26760_p1
Chr02	CDS	37817563	37818133	+	ID=cds.Jr02_26760_p1;Parent=Jr02_26760_p1
Chr02	three_prime_UTR	37818134	37818221	+	ID=Jr02_26760_p1.utr3;Parent=Jr02_26760_p1
Chr03	mRNA	6686668	6688183	+	ID=Jr03_08810_p1;Parent=Jr03_08810
Chr03	exon	6686668	6687036	+	ID=Jr03_08810_p1.exon1;Parent=Jr03_08810_p1
Chr03	five_prime_utr	6686668	6686884	+	ID=Jr03_08810_p1.utr5;Parent=Jr03_08810_p1
Chr03	CDS	6686885	6687036	+	ID=cds.Jr03_08810_p1;Parent=Jr03_08810_p1
Chr03	exon	6687257	6687406	+	ID=Jr03_08810_p1.exon2;Parent=Jr03_08810_p1
Chr03	CDS	6687257	6687406	+	ID=cds.Jr03_08810_p1;Parent=Jr03_08810_p1
Chr03	exon	6687503	6688183	+	ID=Jr03_08810_p1.exon3;Parent=Jr03_08810_p1
Chr03	CDS	6687503	6687953	+	ID=cds.Jr03_08810_p1;Parent=Jr03_08810_p1
Chr03	three_prime_UTR	6687954	6688183	+	ID=Jr03_08810_p1.utr3;Parent=Jr03_08810_p1
Chr03	mRNA	8966269	8969069	-	ID=Jr03_11540_p1;Parent=Jr03_11540
Chr03	exon	8966269	8967242	-	ID=Jr03_11540_p1.exon6;Parent=Jr03_11540_p1
Chr03	three_prime_UTR	8966269	8966540	-	ID=Jr03_11540_p1.utr3;Parent=Jr03_11540_p1
Chr03	mRNA	8966301	8969106	-	ID=Jr03_11550_p1;Parent=Jr03_11550
Chr03	exon	8966301	8967242	-	ID=Jr03_11550_p1.exon6;Parent=Jr03_11550_p1
Chr03	three_prime_UTR	8966301	8966540	-	ID=Jr03_11550_p1.utr3;Parent=Jr03_11550_p1
Chr03	CDS	8966541	8967242	-	ID=cds.Jr03_11540_p1;Parent=Jr03_11540_p1
Chr03	CDS	8966541	8967242	-	ID=cds.Jr03_11550_p1;Parent=Jr03_11550_p1
Chr03	exon	8967374	8967487	-	ID=Jr03_11540_p1.exon5;Parent=Jr03_11540_p1
Chr03	exon	8967374	8967487	-	ID=Jr03_11550_p1.exon5;Parent=Jr03_11550_p1
Chr03	CDS	8967374	8967487	-	ID=cds.Jr03_11540_p1;Parent=Jr03_11540_p1
Chr03	CDS	8967374	8967487	-	ID=cds.Jr03_11550_p1;Parent=Jr03_11550_p1
Chr03	exon	8967599	8967970	-	ID=Jr03_11540_p1.exon4;Parent=Jr03_11540_p1
Chr03	exon	8967599	8967970	-	ID=Jr03_11550_p1.exon4;Parent=Jr03_11550_p1
Chr03	CDS	8967599	8967970	-	ID=cds.Jr03_11540_p1;Parent=Jr03_11540_p1
Chr03	CDS	8967599	8967970	-	ID=cds.Jr03_11550_p1;Parent=Jr03_11550_p1
Chr03	exon	8968098	8968265	-	ID=Jr03_11540_p1.exon3;Parent=Jr03_11540_p1
Chr03	CDS	8968098	8968265	-	ID=cds.Jr03_11540_p1;Parent=Jr03_11540_p1
Chr03	exon	8968098	8968262	-	ID=Jr03_11550_p1.exon3;Parent=Jr03_11550_p1
Chr03	CDS	8968098	8968262	-	ID=cds.Jr03_11550_p1;Parent=Jr03_11550_p1
Chr03	exon	8968398	8968499	-	ID=Jr03_11540_p1.exon2;Parent=Jr03_11540_p1
Chr03	exon	8968398	8968499	-	ID=Jr03_11550_p1.exon2;Parent=Jr03_11550_p1
Chr03	CDS	8968398	8968499	-	ID=cds.Jr03_11540_p1;Parent=Jr03_11540_p1
Chr03	CDS	8968398	8968499	-	ID=cds.Jr03_11550_p1;Parent=Jr03_11550_p1
Chr03	exon	8968628	8969106	-	ID=Jr03_11550_p1.exon1;Parent=Jr03_11550_p1
Chr03	CDS	8968628	8969104	-	ID=cds.Jr03_11550_p1;Parent=Jr03_11550_p1
Chr03	exon	8968628	8969069	-	ID=Jr03_11540_p1.exon1;Parent=Jr03_11540_p1
Chr03	CDS	8968628	8969068	-	ID=cds.Jr03_11540_p1;Parent=Jr03_11540_p1
Chr03	mRNA	12505420	12506994	+	ID=Jr03_15160_p1;Parent=Jr03_15160
Chr03	exon	12505420	12505877	+	ID=Jr03_15160_p1.exon1;Parent=Jr03_15160_p1
Chr03	CDS	12505420	12505877	+	ID=cds.Jr03_15160_p1;Parent=Jr03_15160_p1
Chr03	exon	12505991	12506134	+	ID=Jr03_15160_p1.exon2;Parent=Jr03_15160_p1
Chr03	CDS	12505991	12506134	+	ID=cds.Jr03_15160_p1;Parent=Jr03_15160_p1
Chr03	exon	12506601	12506994	+	ID=Jr03_15160_p1.exon3;Parent=Jr03_15160_p1
Chr03	CDS	12506601	12506994	+	ID=cds.Jr03_15160_p1;Parent=Jr03_15160_p1
Chr03	mRNA	16640736	16644049	-	ID=Jr03_17800_p1;Parent=Jr03_17800
Chr03	exon	16640736	16641437	-	ID=Jr03_17800_p1.exon3;Parent=Jr03_17800_p1
Chr03	three_prime_UTR	16640736	16640830	-	ID=Jr03_17800_p1.utr3;Parent=Jr03_17800_p1
Chr03	CDS	16640831	16641437	-	ID=cds.Jr03_17800_p1;Parent=Jr03_17800_p1
Chr03	exon	16642425	16642565	-	ID=Jr03_17800_p1.exon2;Parent=Jr03_17800_p1
Chr03	CDS	16642425	16642565	-	ID=cds.Jr03_17800_p1;Parent=Jr03_17800_p1
Chr03	exon	16643403	16644049	-	ID=Jr03_17800_p1.exon1;Parent=Jr03_17800_p1
Chr03	CDS	16643403	16644049	-	ID=cds.Jr03_17800_p1;Parent=Jr03_17800_p1
Chr03	mRNA	28818587	28823420	+	ID=Jr03_22520_p1;Parent=Jr03_22520
Chr03	exon	28818587	28818676	+	ID=Jr03_22520_p1.exon1;Parent=Jr03_22520_p1
Chr03	five_prime_utr	28818587	28818676	+	ID=Jr03_22520_p1.utr5;Parent=Jr03_22520_p1
Chr03	exon	28820446	28820920	+	ID=Jr03_22520_p1.exon2;Parent=Jr03_22520_p1
Chr03	five_prime_utr	28820446	28820704	+	ID=Jr03_22520_p1.utr5;Parent=Jr03_22520_p1
Chr03	CDS	28820705	28820920	+	ID=cds.Jr03_22520_p1;Parent=Jr03_22520_p1
Chr03	exon	28820999	28821130	+	ID=Jr03_22520_p1.exon3;Parent=Jr03_22520_p1
Chr03	CDS	28820999	28821130	+	ID=cds.Jr03_22520_p1;Parent=Jr03_22520_p1
Chr03	exon	28821359	28822098	+	ID=Jr03_22520_p1.exon4;Parent=Jr03_22520_p1
Chr03	CDS	28821359	28822098	+	ID=cds.Jr03_22520_p1;Parent=Jr03_22520_p1
Chr03	exon	28822493	28822651	+	ID=Jr03_22520_p1.exon5;Parent=Jr03_22520_p1
Chr03	CDS	28822493	28822651	+	ID=cds.Jr03_22520_p1;Parent=Jr03_22520_p1
Chr03	exon	28822755	28823420	+	ID=Jr03_22520_p1.exon6;Parent=Jr03_22520_p1
Chr03	CDS	28822755	28822941	+	ID=cds.Jr03_22520_p1;Parent=Jr03_22520_p1
Chr03	three_prime_UTR	28822942	28823420	+	ID=Jr03_22520_p1.utr3;Parent=Jr03_22520_p1
Chr03	mRNA	30790330	30792633	-	ID=Jr03_23890_p1;Parent=Jr03_23890
Chr03	exon	30790330	30790918	-	ID=Jr03_23890_p1.exon3;Parent=Jr03_23890_p1
Chr03	CDS	30790330	30790918	-	ID=cds.Jr03_23890_p1;Parent=Jr03_23890_p1
Chr03	exon	30792064	30792207	-	ID=Jr03_23890_p1.exon2;Parent=Jr03_23890_p1
Chr03	CDS	30792064	30792207	-	ID=cds.Jr03_23890_p1;Parent=Jr03_23890_p1
Chr03	exon	30792338	30792633	-	ID=Jr03_23890_p1.exon1;Parent=Jr03_23890_p1
Chr03	CDS	30792338	30792633	-	ID=cds.Jr03_23890_p1;Parent=Jr03_23890_p1
Chr03	mRNA	33672170	33675552	-	ID=Jr03_26460_p1;Parent=Jr03_26460
Chr03	exon	33672170	33672605	-	ID=Jr03_26460_p1.exon5;Parent=Jr03_26460_p1
Chr03	CDS	33672170	33672605	-	ID=cds.Jr03_26460_p1;Parent=Jr03_26460_p1
Chr03	exon	33672830	33672991	-	ID=Jr03_26460_p1.exon4;Parent=Jr03_26460_p1
Chr03	CDS	33672830	33672991	-	ID=cds.Jr03_26460_p1;Parent=Jr03_26460_p1
Chr03	exon	33673082	33673713	-	ID=Jr03_26460_p1.exon3;Parent=Jr03_26460_p1
Chr03	CDS	33673082	33673713	-	ID=cds.Jr03_26460_p1;Parent=Jr03_26460_p1
Chr03	exon	33674958	33675146	-	ID=Jr03_26460_p1.exon2;Parent=Jr03_26460_p1
Chr03	CDS	33674958	33675146	-	ID=cds.Jr03_26460_p1;Parent=Jr03_26460_p1
Chr03	exon	33675277	33675552	-	ID=Jr03_26460_p1.exon1;Parent=Jr03_26460_p1
Chr03	CDS	33675277	33675552	-	ID=cds.Jr03_26460_p1;Parent=Jr03_26460_p1
Chr03	mRNA	34460316	34462179	-	ID=Jr03_27180_p1;Parent=Jr03_27180
Chr03	exon	34460316	34461021	-	ID=Jr03_27180_p1.exon3;Parent=Jr03_27180_p1
Chr03	three_prime_UTR	34460316	34460525	-	ID=Jr03_27180_p1.utr3;Parent=Jr03_27180_p1
Chr03	CDS	34460526	34461021	-	ID=cds.Jr03_27180_p1;Parent=Jr03_27180_p1
Chr03	exon	34461423	34461527	-	ID=Jr03_27180_p1.exon2;Parent=Jr03_27180_p1
Chr03	CDS	34461423	34461527	-	ID=cds.Jr03_27180_p1;Parent=Jr03_27180_p1
Chr03	exon	34461703	34462179	-	ID=Jr03_27180_p1.exon1;Parent=Jr03_27180_p1
Chr03	CDS	34461703	34462034	-	ID=cds.Jr03_27180_p1;Parent=Jr03_27180_p1
Chr03	five_prime_utr	34462035	34462179	-	ID=Jr03_27180_p1.utr5;Parent=Jr03_27180_p1
Chr04	mRNA	534474	535935	+	ID=Jr04_00630_p1;Parent=Jr04_00630
Chr04	exon	534474	534882	+	ID=Jr04_00630_p1.exon1;Parent=Jr04_00630_p1
Chr04	five_prime_utr	534474	534544	+	ID=Jr04_00630_p1.utr5;Parent=Jr04_00630_p1
Chr04	CDS	534545	534882	+	ID=cds.Jr04_00630_p1;Parent=Jr04_00630_p1
Chr04	mRNA	534971	535738	+	ID=Jr04_00640_p1;Parent=Jr04_00640
Chr04	exon	534971	535128	+	ID=Jr04_00640_p1.exon1;Parent=Jr04_00640_p1
Chr04	CDS	534971	535128	+	ID=cds.Jr04_00640_p1;Parent=Jr04_00640_p1
Chr04	exon	535024	535128	+	ID=Jr04_00630_p1.exon2;Parent=Jr04_00630_p1
Chr04	CDS	535024	535128	+	ID=cds.Jr04_00630_p1;Parent=Jr04_00630_p1
Chr04	exon	535288	535935	+	ID=Jr04_00630_p1.exon3;Parent=Jr04_00630_p1
Chr04	exon	535288	535738	+	ID=Jr04_00640_p1.exon2;Parent=Jr04_00640_p1
Chr04	CDS	535288	535738	+	ID=cds.Jr04_00630_p1;Parent=Jr04_00630_p1
Chr04	CDS	535288	535738	+	ID=cds.Jr04_00640_p1;Parent=Jr04_00640_p1
Chr04	three_prime_UTR	535739	535935	+	ID=Jr04_00630_p1.utr3;Parent=Jr04_00630_p1
Chr04	mRNA	1177448	1180318	+	ID=Jr04_01100_p1;Parent=Jr04_01100
Chr04	exon	1177448	1177723	+	ID=Jr04_01100_p1.exon1;Parent=Jr04_01100_p1
Chr04	CDS	1177448	1177723	+	ID=cds.Jr04_01100_p1;Parent=Jr04_01100_p1
Chr04	exon	1177832	1178026	+	ID=Jr04_01100_p1.exon2;Parent=Jr04_01100_p1
Chr04	CDS	1177832	1178026	+	ID=cds.Jr04_01100_p1;Parent=Jr04_01100_p1
Chr04	exon	1178816	1179444	+	ID=Jr04_01100_p1.exon3;Parent=Jr04_01100_p1
Chr04	CDS	1178816	1179444	+	ID=cds.Jr04_01100_p1;Parent=Jr04_01100_p1
Chr04	exon	1179546	1179707	+	ID=Jr04_01100_p1.exon4;Parent=Jr04_01100_p1
Chr04	CDS	1179546	1179707	+	ID=cds.Jr04_01100_p1;Parent=Jr04_01100_p1
Chr04	exon	1179865	1180318	+	ID=Jr04_01100_p1.exon5;Parent=Jr04_01100_p1
Chr04	CDS	1179865	1180318	+	ID=cds.Jr04_01100_p1;Parent=Jr04_01100_p1
Chr04	mRNA	3225759	3228181	+	ID=Jr04_02750_p1;Parent=Jr04_02750
Chr04	exon	3225759	3226009	+	ID=Jr04_02750_p1.exon1;Parent=Jr04_02750_p1
Chr04	CDS	3225759	3226009	+	ID=cds.Jr04_02750_p1;Parent=Jr04_02750_p1
Chr04	exon	3226135	3226281	+	ID=Jr04_02750_p1.exon2;Parent=Jr04_02750_p1
Chr04	CDS	3226135	3226281	+	ID=cds.Jr04_02750_p1;Parent=Jr04_02750_p1
Chr04	exon	3227671	3228181	+	ID=Jr04_02750_p1.exon3;Parent=Jr04_02750_p1
Chr04	CDS	3227671	3228181	+	ID=cds.Jr04_02750_p1;Parent=Jr04_02750_p1
Chr04	mRNA	5385579	5390567	-	ID=Jr04_03880_p1;Parent=Jr04_03880
Chr04	exon	5385579	5386124	-	ID=Jr04_03880_p1.exon6;Parent=Jr04_03880_p1
Chr04	three_prime_UTR	5385579	5385934	-	ID=Jr04_03880_p1.utr3;Parent=Jr04_03880_p1
Chr04	mRNA	5385602	5390075	-	ID=Jr04_03890_p1;Parent=Jr04_03890
Chr04	exon	5385602	5386124	-	ID=Jr04_03890_p1.exon6;Parent=Jr04_03890_p1
Chr04	three_prime_UTR	5385602	5385934	-	ID=Jr04_03890_p1.utr3;Parent=Jr04_03890_p1
Chr04	CDS	5385935	5386124	-	ID=cds.Jr04_03880_p1;Parent=Jr04_03880_p1
Chr04	CDS	5385935	5386124	-	ID=cds.Jr04_03890_p1;Parent=Jr04_03890_p1
Chr04	exon	5386281	5386439	-	ID=Jr04_03880_p1.exon5;Parent=Jr04_03880_p1
Chr04	exon	5386281	5386439	-	ID=Jr04_03890_p1.exon5;Parent=Jr04_03890_p1
Chr04	CDS	5386281	5386439	-	ID=cds.Jr04_03880_p1;Parent=Jr04_03880_p1
Chr04	CDS	5386281	5386439	-	ID=cds.Jr04_03890_p1;Parent=Jr04_03890_p1
Chr04	exon	5386705	5387435	-	ID=Jr04_03880_p1.exon4;Parent=Jr04_03880_p1
Chr04	exon	5386705	5387435	-	ID=Jr04_03890_p1.exon4;Parent=Jr04_03890_p1
Chr04	CDS	5386705	5387435	-	ID=cds.Jr04_03880_p1;Parent=Jr04_03880_p1
Chr04	CDS	5386705	5387435	-	ID=cds.Jr04_03890_p1;Parent=Jr04_03890_p1
Chr04	exon	5387628	5387759	-	ID=Jr04_03880_p1.exon3;Parent=Jr04_03880_p1
Chr04	exon	5387628	5387759	-	ID=Jr04_03890_p1.exon3;Parent=Jr04_03890_p1
Chr04	CDS	5387628	5387759	-	ID=cds.Jr04_03880_p1;Parent=Jr04_03880_p1
Chr04	CDS	5387628	5387759	-	ID=cds.Jr04_03890_p1;Parent=Jr04_03890_p1
Chr04	exon	5387891	5388348	-	ID=Jr04_03880_p1.exon2;Parent=Jr04_03880_p1
Chr04	exon	5387891	5388348	-	ID=Jr04_03890_p1.exon2;Parent=Jr04_03890_p1
Chr04	CDS	5387891	5388106	-	ID=cds.Jr04_03880_p1;Parent=Jr04_03880_p1
Chr04	CDS	5387891	5388106	-	ID=cds.Jr04_03890_p1;Parent=Jr04_03890_p1
Chr04	five_prime_utr	5388107	5388348	-	ID=Jr04_03880_p1.utr5;Parent=Jr04_03880_p1
Chr04	five_prime_utr	5388107	5388348	-	ID=Jr04_03890_p1.utr5;Parent=Jr04_03890_p1
Chr04	exon	5390036	5390075	-	ID=Jr04_03890_p1.exon1;Parent=Jr04_03890_p1
Chr04	five_prime_utr	5390036	5390075	-	ID=Jr04_03890_p1.utr5;Parent=Jr04_03890_p1
Chr04	exon	5390370	5390567	-	ID=Jr04_03880_p1.exon1;Parent=Jr04_03880_p1
Chr04	five_prime_utr	5390370	5390567	-	ID=Jr04_03880_p1.utr5;Parent=Jr04_03880_p1
Chr04	mRNA	23464240	23465703	-	ID=Jr04_10710_p1;Parent=Jr04_10710
Chr04	exon	23464240	23464633	-	ID=Jr04_10710_p1.exon3;Parent=Jr04_10710_p1
Chr04	CDS	23464240	23464633	-	ID=cds.Jr04_10710_p1;Parent=Jr04_10710_p1
Chr04	exon	23465004	23465150	-	ID=Jr04_10710_p1.exon2;Parent=Jr04_10710_p1
Chr04	CDS	23465004	23465150	-	ID=cds.Jr04_10710_p1;Parent=Jr04_10710_p1
Chr04	exon	23465258	23465703	-	ID=Jr04_10710_p1.exon1;Parent=Jr04_10710_p1
Chr04	CDS	23465258	23465703	-	ID=cds.Jr04_10710_p1;Parent=Jr04_10710_p1
Chr04	mRNA	27402480	27405225	+	ID=Jr04_13770_p1;Parent=Jr04_13770
Chr04	exon	27402480	27402900	+	ID=Jr04_13770_p1.exon1;Parent=Jr04_13770_p1
Chr04	CDS	27402481	27402900	+	ID=cds.Jr04_13770_p1;Parent=Jr04_13770_p1
Chr04	exon	27403058	27403156	+	ID=Jr04_13770_p1.exon2;Parent=Jr04_13770_p1
Chr04	CDS	27403058	27403156	+	ID=cds.Jr04_13770_p1;Parent=Jr04_13770_p1
Chr04	exon	27403298	27403462	+	ID=Jr04_13770_p1.exon3;Parent=Jr04_13770_p1
Chr04	CDS	27403298	27403462	+	ID=cds.Jr04_13770_p1;Parent=Jr04_13770_p1
Chr04	exon	27403569	27403940	+	ID=Jr04_13770_p1.exon4;Parent=Jr04_13770_p1
Chr04	CDS	27403569	27403940	+	ID=cds.Jr04_13770_p1;Parent=Jr04_13770_p1
Chr04	exon	27404037	27404150	+	ID=Jr04_13770_p1.exon5;Parent=Jr04_13770_p1
Chr04	CDS	27404037	27404150	+	ID=cds.Jr04_13770_p1;Parent=Jr04_13770_p1
Chr04	exon	27404265	27405225	+	ID=Jr04_13770_p1.exon6;Parent=Jr04_13770_p1
Chr04	CDS	27404265	27404978	+	ID=cds.Jr04_13770_p1;Parent=Jr04_13770_p1
Chr04	three_prime_UTR	27404979	27405225	+	ID=Jr04_13770_p1.utr3;Parent=Jr04_13770_p1
Chr04	mRNA	29033662	29034819	-	ID=Jr04_15560_p1;Parent=Jr04_15560
Chr04	mRNA	29033662	29034819	-	ID=Jr04_15570_p1;Parent=Jr04_15560
Chr04	exon	29033662	29034124	-	ID=Jr04_15560_p1.exon3;Parent=Jr04_15560_p1
Chr04	exon	29033662	29034124	-	ID=Jr04_15570_p1.exon3;Parent=Jr04_15570_p1
Chr04	CDS	29033662	29034124	-	ID=cds.Jr04_15560_p1;Parent=Jr04_15560_p1
Chr04	CDS	29033662	29034124	-	ID=cds.Jr04_15570_p1;Parent=Jr04_15570_p1
Chr04	exon	29034294	29034443	-	ID=Jr04_15570_p1.exon2;Parent=Jr04_15570_p1
Chr04	CDS	29034294	29034443	-	ID=cds.Jr04_15570_p1;Parent=Jr04_15570_p1
Chr04	exon	29034294	29034440	-	ID=Jr04_15560_p1.exon2;Parent=Jr04_15560_p1
Chr04	CDS	29034294	29034440	-	ID=cds.Jr04_15560_p1;Parent=Jr04_15560_p1
Chr04	exon	29034659	29034819	-	ID=Jr04_15560_p1.exon1;Parent=Jr04_15560_p1
Chr04	exon	29034659	29034819	-	ID=Jr04_15570_p1.exon1;Parent=Jr04_15570_p1
Chr04	CDS	29034659	29034819	-	ID=cds.Jr04_15560_p1;Parent=Jr04_15560_p1
Chr04	CDS	29034659	29034819	-	ID=cds.Jr04_15570_p1;Parent=Jr04_15570_p1
Chr05	mRNA	6061308	6064340	+	ID=Jr05_06670_p1;Parent=Jr05_06670
Chr05	exon	6061308	6061779	+	ID=Jr05_06670_p1.exon1;Parent=Jr05_06670_p1
Chr05	CDS	6061309	6061779	+	ID=cds.Jr05_06670_p1;Parent=Jr05_06670_p1
Chr05	exon	6062209	6062397	+	ID=Jr05_06670_p1.exon2;Parent=Jr05_06670_p1
Chr05	CDS	6062209	6062397	+	ID=cds.Jr05_06670_p1;Parent=Jr05_06670_p1
Chr05	exon	6062496	6063142	+	ID=Jr05_06670_p1.exon3;Parent=Jr05_06670_p1
Chr05	CDS	6062496	6063142	+	ID=cds.Jr05_06670_p1;Parent=Jr05_06670_p1
Chr05	exon	6063239	6063400	+	ID=Jr05_06670_p1.exon4;Parent=Jr05_06670_p1
Chr05	CDS	6063239	6063400	+	ID=cds.Jr05_06670_p1;Parent=Jr05_06670_p1
Chr05	exon	6063620	6064340	+	ID=Jr05_06670_p1.exon5;Parent=Jr05_06670_p1
Chr05	CDS	6063620	6064022	+	ID=cds.Jr05_06670_p1;Parent=Jr05_06670_p1
Chr05	three_prime_UTR	6064023	6064340	+	ID=Jr05_06670_p1.utr3;Parent=Jr05_06670_p1
Chr06	mRNA	16659271	16660378	-	ID=Jr06_10190_p1;Parent=Jr06_10190
Chr06	mRNA	16659271	16660378	-	ID=Jr06_10200_p1;Parent=Jr06_10190
Chr06	exon	16659271	16659394	-	ID=Jr06_10190_p1.exon3;Parent=Jr06_10190_p1
Chr06	exon	16659271	16659394	-	ID=Jr06_10200_p1.exon3;Parent=Jr06_10200_p1
Chr06	CDS	16659271	16659394	-	ID=cds.Jr06_10190_p1;Parent=Jr06_10190_p1
Chr06	CDS	16659271	16659394	-	ID=cds.Jr06_10200_p1;Parent=Jr06_10200_p1
Chr06	exon	16659866	16659998	-	ID=Jr06_10190_p1.exon2;Parent=Jr06_10190_p1
Chr06	exon	16659866	16659998	-	ID=Jr06_10200_p1.exon2;Parent=Jr06_10200_p1
Chr06	CDS	16659866	16659998	-	ID=cds.Jr06_10190_p1;Parent=Jr06_10190_p1
Chr06	CDS	16659866	16659998	-	ID=cds.Jr06_10200_p1;Parent=Jr06_10200_p1
Chr06	exon	16660141	16660378	-	ID=Jr06_10200_p1.exon1;Parent=Jr06_10200_p1
Chr06	CDS	16660141	16660378	-	ID=cds.Jr06_10200_p1;Parent=Jr06_10200_p1
Chr06	exon	16660192	16660378	-	ID=Jr06_10190_p1.exon1;Parent=Jr06_10190_p1
Chr06	CDS	16660192	16660378	-	ID=cds.Jr06_10190_p1;Parent=Jr06_10190_p1
Chr07	mRNA	8623216	8624525	+	ID=Jr07_07490_p1;Parent=Jr07_07490
Chr07	exon	8623216	8623640	+	ID=Jr07_07490_p1.exon1;Parent=Jr07_07490_p1
Chr07	CDS	8623216	8623640	+	ID=cds.Jr07_07490_p1;Parent=Jr07_07490_p1
Chr07	exon	8623814	8623924	+	ID=Jr07_07490_p1.exon2;Parent=Jr07_07490_p1
Chr07	CDS	8623814	8623924	+	ID=cds.Jr07_07490_p1;Parent=Jr07_07490_p1
Chr07	exon	8624036	8624525	+	ID=Jr07_07490_p1.exon3;Parent=Jr07_07490_p1
Chr07	CDS	8624036	8624525	+	ID=cds.Jr07_07490_p1;Parent=Jr07_07490_p1
Chr07	mRNA	8730173	8732963	+	ID=Jr07_07550_p1;Parent=Jr07_07550
Chr07	exon	8730173	8730603	+	ID=Jr07_07550_p1.exon1;Parent=Jr07_07550_p1
Chr07	CDS	8730173	8730603	+	ID=cds.Jr07_07550_p1;Parent=Jr07_07550_p1
Chr07	exon	8732786	8732963	+	ID=Jr07_07550_p1.exon2;Parent=Jr07_07550_p1
Chr07	CDS	8732786	8732963	+	ID=cds.Jr07_07550_p1;Parent=Jr07_07550_p1
Chr07	mRNA	10167501	10169403	-	ID=Jr07_08410_p1;Parent=Jr07_08410
Chr07	exon	10167501	10168143	-	ID=Jr07_08410_p1.exon3;Parent=Jr07_08410_p1
Chr07	CDS	10167501	10168143	-	ID=cds.Jr07_08410_p1;Parent=Jr07_08410_p1
Chr07	exon	10168876	10169004	-	ID=Jr07_08410_p1.exon2;Parent=Jr07_08410_p1
Chr07	CDS	10168876	10169004	-	ID=cds.Jr07_08410_p1;Parent=Jr07_08410_p1
Chr07	exon	10169096	10169403	-	ID=Jr07_08410_p1.exon1;Parent=Jr07_08410_p1
Chr07	CDS	10169096	10169403	-	ID=cds.Jr07_08410_p1;Parent=Jr07_08410_p1
Chr07	mRNA	16744168	16745973	+	ID=Jr07_11780_p1;Parent=Jr07_11780
Chr07	exon	16744168	16744785	+	ID=Jr07_11780_p1.exon1;Parent=Jr07_11780_p1
Chr07	five_prime_utr	16744168	16744330	+	ID=Jr07_11780_p1.utr5;Parent=Jr07_11780_p1
Chr07	CDS	16744331	16744785	+	ID=cds.Jr07_11780_p1;Parent=Jr07_11780_p1
Chr07	exon	16745053	16745196	+	ID=Jr07_11780_p1.exon2;Parent=Jr07_11780_p1
Chr07	CDS	16745053	16745196	+	ID=cds.Jr07_11780_p1;Parent=Jr07_11780_p1
Chr07	exon	16745335	16745973	+	ID=Jr07_11780_p1.exon3;Parent=Jr07_11780_p1
Chr07	CDS	16745335	16745737	+	ID=cds.Jr07_11780_p1;Parent=Jr07_11780_p1
Chr07	three_prime_UTR	16745738	16745973	+	ID=Jr07_11780_p1.utr3;Parent=Jr07_11780_p1
Chr07	mRNA	18123465	18127153	-	ID=Jr07_12950_p1;Parent=Jr07_12950
Chr07	exon	18123465	18124254	-	ID=Jr07_12950_p1.exon6;Parent=Jr07_12950_p1
Chr07	three_prime_UTR	18123465	18123588	-	ID=Jr07_12950_p1.utr3;Parent=Jr07_12950_p1
Chr07	CDS	18123589	18124254	-	ID=cds.Jr07_12950_p1;Parent=Jr07_12950_p1
Chr07	exon	18124853	18124966	-	ID=Jr07_12950_p1.exon5;Parent=Jr07_12950_p1
Chr07	CDS	18124853	18124966	-	ID=cds.Jr07_12950_p1;Parent=Jr07_12950_p1
Chr07	exon	18125123	18125485	-	ID=Jr07_12950_p1.exon4;Parent=Jr07_12950_p1
Chr07	CDS	18125123	18125485	-	ID=cds.Jr07_12950_p1;Parent=Jr07_12950_p1
Chr07	exon	18126213	18126371	-	ID=Jr07_12950_p1.exon3;Parent=Jr07_12950_p1
Chr07	CDS	18126213	18126371	-	ID=cds.Jr07_12950_p1;Parent=Jr07_12950_p1
Chr07	exon	18126500	18126580	-	ID=Jr07_12950_p1.exon2;Parent=Jr07_12950_p1
Chr07	CDS	18126500	18126580	-	ID=cds.Jr07_12950_p1;Parent=Jr07_12950_p1
Chr07	exon	18126815	18127153	-	ID=Jr07_12950_p1.exon1;Parent=Jr07_12950_p1
Chr07	CDS	18126815	18127054	-	ID=cds.Jr07_12950_p1;Parent=Jr07_12950_p1
Chr07	five_prime_utr	18127055	18127153	-	ID=Jr07_12950_p1.utr5;Parent=Jr07_12950_p1
Chr07	mRNA	47144599	47146990	+	ID=Jr07_32310_p1;Parent=Jr07_32310
Chr07	exon	47144599	47145016	+	ID=Jr07_32310_p1.exon1;Parent=Jr07_32310_p1
Chr07	five_prime_utr	47144599	47144938	+	ID=Jr07_32310_p1.utr5;Parent=Jr07_32310_p1
Chr07	CDS	47144939	47145016	+	ID=cds.Jr07_32310_p1;Parent=Jr07_32310_p1
Chr07	exon	47145134	47145196	+	ID=Jr07_32310_p1.exon2;Parent=Jr07_32310_p1
Chr07	CDS	47145134	47145196	+	ID=cds.Jr07_32310_p1;Parent=Jr07_32310_p1
Chr07	exon	47145415	47145732	+	ID=Jr07_32310_p1.exon3;Parent=Jr07_32310_p1
Chr07	CDS	47145415	47145732	+	ID=cds.Jr07_32310_p1;Parent=Jr07_32310_p1
Chr07	exon	47145864	47145980	+	ID=Jr07_32310_p1.exon4;Parent=Jr07_32310_p1
Chr07	CDS	47145864	47145980	+	ID=cds.Jr07_32310_p1;Parent=Jr07_32310_p1
Chr07	exon	47146324	47146990	+	ID=Jr07_32310_p1.exon5;Parent=Jr07_32310_p1
Chr07	CDS	47146324	47146686	+	ID=cds.Jr07_32310_p1;Parent=Jr07_32310_p1
Chr07	three_prime_UTR	47146687	47146990	+	ID=Jr07_32310_p1.utr3;Parent=Jr07_32310_p1
Chr07	mRNA	52122790	52125284	+	ID=Jr07_38970_p1;Parent=Jr07_38970
Chr07	exon	52122790	52123316	+	ID=Jr07_38970_p1.exon1;Parent=Jr07_38970_p1
Chr07	CDS	52122790	52123316	+	ID=cds.Jr07_38970_p1;Parent=Jr07_38970_p1
Chr07	exon	52123584	52123718	+	ID=Jr07_38970_p1.exon2;Parent=Jr07_38970_p1
Chr07	CDS	52123584	52123718	+	ID=cds.Jr07_38970_p1;Parent=Jr07_38970_p1
Chr07	exon	52124789	52125284	+	ID=Jr07_38970_p1.exon3;Parent=Jr07_38970_p1
Chr07	CDS	52124789	52125284	+	ID=cds.Jr07_38970_p1;Parent=Jr07_38970_p1
Chr07	mRNA	52128555	52130044	-	ID=Jr07_38980_p1;Parent=Jr07_38980
Chr07	mRNA	52128555	52130044	-	ID=Jr07_38990_p1;Parent=Jr07_38980
Chr07	exon	52128555	52129050	-	ID=Jr07_38980_p1.exon3;Parent=Jr07_38980_p1
Chr07	exon	52128555	52129050	-	ID=Jr07_38990_p1.exon3;Parent=Jr07_38990_p1
Chr07	CDS	52128555	52129050	-	ID=cds.Jr07_38980_p1;Parent=Jr07_38980_p1
Chr07	CDS	52128555	52129050	-	ID=cds.Jr07_38990_p1;Parent=Jr07_38990_p1
Chr07	exon	52129235	52129339	-	ID=Jr07_38980_p1.exon2;Parent=Jr07_38980_p1
Chr07	CDS	52129235	52129339	-	ID=cds.Jr07_38980_p1;Parent=Jr07_38980_p1
Chr07	exon	52129235	52129336	-	ID=Jr07_38990_p1.exon2;Parent=Jr07_38990_p1
Chr07	CDS	52129235	52129336	-	ID=cds.Jr07_38990_p1;Parent=Jr07_38990_p1
Chr07	exon	52129707	52130044	-	ID=Jr07_38980_p1.exon1;Parent=Jr07_38980_p1
Chr07	exon	52129707	52130044	-	ID=Jr07_38990_p1.exon1;Parent=Jr07_38990_p1
Chr07	CDS	52129707	52130044	-	ID=cds.Jr07_38980_p1;Parent=Jr07_38980_p1
Chr07	CDS	52129707	52130044	-	ID=cds.Jr07_38990_p1;Parent=Jr07_38990_p1
Chr08	mRNA	740604	742489	-	ID=Jr08_00860_p1;Parent=Jr08_00860
Chr08	exon	740604	740999	-	ID=Jr08_00860_p1.exon4;Parent=Jr08_00860_p1
Chr08	CDS	740604	740999	-	ID=cds.Jr08_00860_p1;Parent=Jr08_00860_p1
Chr08	exon	741204	741323	-	ID=Jr08_00860_p1.exon3;Parent=Jr08_00860_p1
Chr08	CDS	741204	741323	-	ID=cds.Jr08_00860_p1;Parent=Jr08_00860_p1
Chr08	exon	741821	742096	-	ID=Jr08_00860_p1.exon2;Parent=Jr08_00860_p1
Chr08	CDS	741821	742096	-	ID=cds.Jr08_00860_p1;Parent=Jr08_00860_p1
Chr08	exon	742451	742489	-	ID=Jr08_00860_p1.exon1;Parent=Jr08_00860_p1
Chr08	CDS	742451	742489	-	ID=cds.Jr08_00860_p1;Parent=Jr08_00860_p1
Chr08	mRNA	750820	753213	-	ID=Jr08_00870_p1;Parent=Jr08_00870
Chr08	exon	750820	751460	-	ID=Jr08_00870_p1.exon5;Parent=Jr08_00870_p1
Chr08	three_prime_UTR	750820	751094	-	ID=Jr08_00870_p1.utr3;Parent=Jr08_00870_p1
Chr08	mRNA	751095	753037	-	ID=Jr08_00880_p1;Parent=Jr08_00880
Chr08	mRNA	751095	753037	-	ID=Jr08_00890_p1;Parent=Jr08_00880
Chr08	exon	751095	751460	-	ID=Jr08_00880_p1.exon5;Parent=Jr08_00880_p1
Chr08	exon	751095	751460	-	ID=Jr08_00890_p1.exon5;Parent=Jr08_00890_p1
Chr08	CDS	751095	751460	-	ID=cds.Jr08_00870_p1;Parent=Jr08_00870_p1
Chr08	CDS	751095	751460	-	ID=cds.Jr08_00880_p1;Parent=Jr08_00880_p1
Chr08	CDS	751095	751460	-	ID=cds.Jr08_00890_p1;Parent=Jr08_00890_p1
Chr08	exon	751566	751682	-	ID=Jr08_00870_p1.exon4;Parent=Jr08_00870_p1
Chr08	exon	751566	751682	-	ID=Jr08_00880_p1.exon4;Parent=Jr08_00880_p1
Chr08	exon	751566	751682	-	ID=Jr08_00890_p1.exon4;Parent=Jr08_00890_p1
Chr08	CDS	751566	751682	-	ID=cds.Jr08_00870_p1;Parent=Jr08_00870_p1
Chr08	CDS	751566	751682	-	ID=cds.Jr08_00880_p1;Parent=Jr08_00880_p1
Chr08	CDS	751566	751682	-	ID=cds.Jr08_00890_p1;Parent=Jr08_00890_p1
Chr08	exon	751922	752221	-	ID=Jr08_00870_p1.exon3;Parent=Jr08_00870_p1
Chr08	exon	751922	752221	-	ID=Jr08_00880_p1.exon3;Parent=Jr08_00880_p1
Chr08	exon	751922	752221	-	ID=Jr08_00890_p1.exon3;Parent=Jr08_00890_p1
Chr08	CDS	751922	752221	-	ID=cds.Jr08_00870_p1;Parent=Jr08_00870_p1
Chr08	CDS	751922	752221	-	ID=cds.Jr08_00880_p1;Parent=Jr08_00880_p1
Chr08	CDS	751922	752221	-	ID=cds.Jr08_00890_p1;Parent=Jr08_00890_p1
Chr08	exon	752833	752922	-	ID=Jr08_00880_p1.exon2;Parent=Jr08_00880_p1
Chr08	CDS	752833	752922	-	ID=cds.Jr08_00880_p1;Parent=Jr08_00880_p1
Chr08	exon	752833	752898	-	ID=Jr08_00870_p1.exon2;Parent=Jr08_00870_p1
Chr08	CDS	752833	752898	-	ID=cds.Jr08_00870_p1;Parent=Jr08_00870_p1
Chr08	exon	752833	752865	-	ID=Jr08_00890_p1.exon2;Parent=Jr08_00890_p1
Chr08	CDS	752833	752865	-	ID=cds.Jr08_00890_p1;Parent=Jr08_00890_p1
Chr08	exon	753017	753213	-	ID=Jr08_00870_p1.exon1;Parent=Jr08_00870_p1
Chr08	CDS	753017	753211	-	ID=cds.Jr08_00870_p1;Parent=Jr08_00870_p1
Chr08	exon	753017	753037	-	ID=Jr08_00880_p1.exon1;Parent=Jr08_00880_p1
Chr08	exon	753017	753037	-	ID=Jr08_00890_p1.exon1;Parent=Jr08_00890_p1
Chr08	CDS	753017	753037	-	ID=cds.Jr08_00880_p1;Parent=Jr08_00880_p1
Chr08	CDS	753017	753037	-	ID=cds.Jr08_00890_p1;Parent=Jr08_00890_p1
Chr08	mRNA	10000424	10002312	-	ID=Jr08_11260_p1;Parent=Jr08_11260
Chr08	exon	10000424	10001198	-	ID=Jr08_11260_p1.exon3;Parent=Jr08_11260_p1
Chr08	three_prime_UTR	10000424	10000777	-	ID=Jr08_11260_p1.utr3;Parent=Jr08_11260_p1
Chr08	CDS	10000778	10001198	-	ID=cds.Jr08_11260_p1;Parent=Jr08_11260_p1
Chr08	exon	10001354	10001497	-	ID=Jr08_11260_p1.exon2;Parent=Jr08_11260_p1
Chr08	CDS	10001354	10001497	-	ID=cds.Jr08_11260_p1;Parent=Jr08_11260_p1
Chr08	exon	10001744	10002312	-	ID=Jr08_11260_p1.exon1;Parent=Jr08_11260_p1
Chr08	CDS	10001744	10002117	-	ID=cds.Jr08_11260_p1;Parent=Jr08_11260_p1
Chr08	five_prime_utr	10002118	10002312	-	ID=Jr08_11260_p1.utr5;Parent=Jr08_11260_p1
Chr08	mRNA	10150140	10151340	-	ID=Jr08_11410_p1;Parent=Jr08_11410
Chr08	exon	10150140	10150701	-	ID=Jr08_11410_p1.exon3;Parent=Jr08_11410_p1
Chr08	CDS	10150140	10150701	-	ID=cds.Jr08_11410_p1;Parent=Jr08_11410_p1
Chr08	exon	10150949	10151086	-	ID=Jr08_11410_p1.exon2;Parent=Jr08_11410_p1
Chr08	CDS	10150949	10151086	-	ID=cds.Jr08_11410_p1;Parent=Jr08_11410_p1
Chr08	exon	10151261	10151340	-	ID=Jr08_11410_p1.exon1;Parent=Jr08_11410_p1
Chr08	CDS	10151261	10151340	-	ID=cds.Jr08_11410_p1;Parent=Jr08_11410_p1
Chr08	mRNA	17501520	17508602	+	ID=Jr08_14560_p1;Parent=Jr08_14560
Chr08	exon	17501520	17502037	+	ID=Jr08_14560_p1.exon1;Parent=Jr08_14560_p1
Chr08	five_prime_utr	17501520	17501800	+	ID=Jr08_14560_p1.utr5;Parent=Jr08_14560_p1
Chr08	mRNA	17501532	17509923	+	ID=Jr08_14570_p1;Parent=Jr08_14570
Chr08	exon	17501532	17502037	+	ID=Jr08_14570_p1.exon1;Parent=Jr08_14570_p1
Chr08	five_prime_utr	17501532	17501800	+	ID=Jr08_14570_p1.utr5;Parent=Jr08_14570_p1
Chr08	CDS	17501801	17502037	+	ID=cds.Jr08_14560_p1;Parent=Jr08_14560_p1
Chr08	CDS	17501801	17502037	+	ID=cds.Jr08_14570_p1;Parent=Jr08_14570_p1
Chr08	exon	17503921	17504097	+	ID=Jr08_14560_p1.exon2;Parent=Jr08_14560_p1
Chr08	exon	17503921	17504097	+	ID=Jr08_14570_p1.exon2;Parent=Jr08_14570_p1
Chr08	CDS	17503921	17504097	+	ID=cds.Jr08_14560_p1;Parent=Jr08_14560_p1
Chr08	CDS	17503921	17504097	+	ID=cds.Jr08_14570_p1;Parent=Jr08_14570_p1
Chr08	exon	17507624	17508602	+	ID=Jr08_14560_p1.exon3;Parent=Jr08_14560_p1
Chr08	CDS	17507624	17508556	+	ID=cds.Jr08_14560_p1;Parent=Jr08_14560_p1
Chr08	exon	17507624	17508495	+	ID=Jr08_14570_p1.exon3;Parent=Jr08_14570_p1
Chr08	CDS	17507624	17508495	+	ID=cds.Jr08_14570_p1;Parent=Jr08_14570_p1
Chr08	three_prime_UTR	17508557	17508602	+	ID=Jr08_14560_p1.utr3;Parent=Jr08_14560_p1
Chr08	exon	17508580	17508738	+	ID=Jr08_14570_p1.exon4;Parent=Jr08_14570_p1
Chr08	CDS	17508580	17508738	+	ID=cds.Jr08_14570_p1;Parent=Jr08_14570_p1
Chr08	exon	17509005	17509923	+	ID=Jr08_14570_p1.exon5;Parent=Jr08_14570_p1
Chr08	CDS	17509005	17509731	+	ID=cds.Jr08_14570_p1;Parent=Jr08_14570_p1
Chr08	three_prime_UTR	17509732	17509923	+	ID=Jr08_14570_p1.utr3;Parent=Jr08_14570_p1
Chr09	mRNA	8762153	8767490	-	ID=Jr09_02120_p1;Parent=Jr09_02120
Chr09	exon	8762153	8762854	-	ID=Jr09_02120_p1.exon5;Parent=Jr09_02120_p1
Chr09	CDS	8762153	8762854	-	ID=cds.Jr09_02120_p1;Parent=Jr09_02120_p1
Chr09	exon	8764332	8764445	-	ID=Jr09_02120_p1.exon4;Parent=Jr09_02120_p1
Chr09	CDS	8764332	8764445	-	ID=cds.Jr09_02120_p1;Parent=Jr09_02120_p1
Chr09	exon	8764760	8765272	-	ID=Jr09_02120_p1.exon3;Parent=Jr09_02120_p1
Chr09	CDS	8764760	8765272	-	ID=cds.Jr09_02120_p1;Parent=Jr09_02120_p1
Chr09	exon	8766559	8766645	-	ID=Jr09_02120_p1.exon2;Parent=Jr09_02120_p1
Chr09	CDS	8766559	8766645	-	ID=cds.Jr09_02120_p1;Parent=Jr09_02120_p1
Chr09	exon	8767440	8767490	-	ID=Jr09_02120_p1.exon1;Parent=Jr09_02120_p1
Chr09	CDS	8767440	8767490	-	ID=cds.Jr09_02120_p1;Parent=Jr09_02120_p1
Chr09	mRNA	19146932	19148857	+	ID=Jr09_09980_p1;Parent=Jr09_09980
Chr09	exon	19146932	19147543	+	ID=Jr09_09980_p1.exon1;Parent=Jr09_09980_p1
Chr09	five_prime_utr	19146932	19147217	+	ID=Jr09_09980_p1.utr5;Parent=Jr09_09980_p1
Chr09	CDS	19147218	19147543	+	ID=cds.Jr09_09980_p1;Parent=Jr09_09980_p1
Chr09	exon	19147653	19147781	+	ID=Jr09_09980_p1.exon2;Parent=Jr09_09980_p1
Chr09	CDS	19147653	19147781	+	ID=cds.Jr09_09980_p1;Parent=Jr09_09980_p1
Chr09	exon	19148098	19148857	+	ID=Jr09_09980_p1.exon3;Parent=Jr09_09980_p1
Chr09	CDS	19148098	19148725	+	ID=cds.Jr09_09980_p1;Parent=Jr09_09980_p1
Chr09	three_prime_UTR	19148726	19148857	+	ID=Jr09_09980_p1.utr3;Parent=Jr09_09980_p1
Chr09	mRNA	19656186	19659206	-	ID=Jr09_10570_p1;Parent=Jr09_10570
Chr09	exon	19656186	19656363	-	ID=Jr09_10570_p1.exon2;Parent=Jr09_10570_p1
Chr09	CDS	19656186	19656363	-	ID=cds.Jr09_10570_p1;Parent=Jr09_10570_p1
Chr09	exon	19658833	19659206	-	ID=Jr09_10570_p1.exon1;Parent=Jr09_10570_p1
Chr09	CDS	19658833	19659206	-	ID=cds.Jr09_10570_p1;Parent=Jr09_10570_p1
Chr09	mRNA	19664428	19665485	-	ID=Jr09_10580_p1;Parent=Jr09_10580
Chr09	exon	19664428	19665046	-	ID=Jr09_10580_p1.exon2;Parent=Jr09_10580_p1
Chr09	CDS	19664428	19665046	-	ID=cds.Jr09_10580_p1;Parent=Jr09_10580_p1
Chr09	exon	19665154	19665485	-	ID=Jr09_10580_p1.exon1;Parent=Jr09_10580_p1
Chr09	CDS	19665154	19665485	-	ID=cds.Jr09_10580_p1;Parent=Jr09_10580_p1
Chr09	mRNA	23692181	23697517	+	ID=Jr09_16000_p1;Parent=Jr09_16000
Chr09	exon	23692181	23692519	+	ID=Jr09_16000_p1.exon1;Parent=Jr09_16000_p1
Chr09	five_prime_utr	23692181	23692291	+	ID=Jr09_16000_p1.utr5;Parent=Jr09_16000_p1
Chr09	mRNA	23692235	23697516	+	ID=Jr09_16010_p1;Parent=Jr09_16010
Chr09	exon	23692235	23692519	+	ID=Jr09_16010_p1.exon1;Parent=Jr09_16010_p1
Chr09	five_prime_utr	23692235	23692291	+	ID=Jr09_16010_p1.utr5;Parent=Jr09_16010_p1
Chr09	CDS	23692292	23692519	+	ID=cds.Jr09_16000_p1;Parent=Jr09_16000_p1
Chr09	CDS	23692292	23692519	+	ID=cds.Jr09_16010_p1;Parent=Jr09_16010_p1
Chr09	exon	23694065	23694229	+	ID=Jr09_16000_p1.exon2;Parent=Jr09_16000_p1
Chr09	exon	23694065	23694229	+	ID=Jr09_16010_p1.exon2;Parent=Jr09_16010_p1
Chr09	CDS	23694065	23694229	+	ID=cds.Jr09_16000_p1;Parent=Jr09_16000_p1
Chr09	CDS	23694065	23694229	+	ID=cds.Jr09_16010_p1;Parent=Jr09_16010_p1
Chr09	exon	23694741	23695293	+	ID=Jr09_16000_p1.exon3;Parent=Jr09_16000_p1
Chr09	exon	23694741	23695293	+	ID=Jr09_16010_p1.exon3;Parent=Jr09_16010_p1
Chr09	CDS	23694741	23695293	+	ID=cds.Jr09_16000_p1;Parent=Jr09_16000_p1
Chr09	CDS	23694741	23695293	+	ID=cds.Jr09_16010_p1;Parent=Jr09_16010_p1
Chr09	exon	23695387	23695549	+	ID=Jr09_16000_p1.exon4;Parent=Jr09_16000_p1
Chr09	exon	23695387	23695549	+	ID=Jr09_16010_p1.exon4;Parent=Jr09_16010_p1
Chr09	CDS	23695387	23695549	+	ID=cds.Jr09_16000_p1;Parent=Jr09_16000_p1
Chr09	CDS	23695387	23695549	+	ID=cds.Jr09_16010_p1;Parent=Jr09_16010_p1
Chr09	exon	23695630	23695791	+	ID=Jr09_16000_p1.exon5;Parent=Jr09_16000_p1
Chr09	CDS	23695630	23695791	+	ID=cds.Jr09_16000_p1;Parent=Jr09_16000_p1
Chr09	exon	23695633	23695791	+	ID=Jr09_16010_p1.exon5;Parent=Jr09_16010_p1
Chr09	CDS	23695633	23695791	+	ID=cds.Jr09_16010_p1;Parent=Jr09_16010_p1
Chr09	exon	23696664	23697517	+	ID=Jr09_16000_p1.exon6;Parent=Jr09_16000_p1
Chr09	exon	23696664	23697516	+	ID=Jr09_16010_p1.exon6;Parent=Jr09_16010_p1
Chr09	CDS	23696664	23697162	+	ID=cds.Jr09_16000_p1;Parent=Jr09_16000_p1
Chr09	CDS	23696664	23697162	+	ID=cds.Jr09_16010_p1;Parent=Jr09_16010_p1
Chr09	three_prime_UTR	23697163	23697517	+	ID=Jr09_16000_p1.utr3;Parent=Jr09_16000_p1
Chr09	three_prime_UTR	23697163	23697516	+	ID=Jr09_16010_p1.utr3;Parent=Jr09_16010_p1
Chr10	mRNA	1100736	1104561	+	ID=Jr10_01810_p1;Parent=Jr10_01810
Chr10	exon	1100736	1101149	+	ID=Jr10_01810_p1.exon1;Parent=Jr10_01810_p1
Chr10	CDS	1100736	1101149	+	ID=cds.Jr10_01810_p1;Parent=Jr10_01810_p1
Chr10	exon	1102009	1102718	+	ID=Jr10_01810_p1.exon2;Parent=Jr10_01810_p1
Chr10	CDS	1102009	1102718	+	ID=cds.Jr10_01810_p1;Parent=Jr10_01810_p1
Chr10	exon	1102797	1102955	+	ID=Jr10_01810_p1.exon3;Parent=Jr10_01810_p1
Chr10	CDS	1102797	1102955	+	ID=cds.Jr10_01810_p1;Parent=Jr10_01810_p1
Chr10	exon	1104291	1104561	+	ID=Jr10_01810_p1.exon4;Parent=Jr10_01810_p1
Chr10	CDS	1104291	1104561	+	ID=cds.Jr10_01810_p1;Parent=Jr10_01810_p1
Chr10	mRNA	1481084	1484699	-	ID=Jr10_02340_p1;Parent=Jr10_02340
Chr10	exon	1481084	1481944	-	ID=Jr10_02340_p1.exon4;Parent=Jr10_02340_p1
Chr10	CDS	1481084	1481944	-	ID=cds.Jr10_02340_p1;Parent=Jr10_02340_p1
Chr10	exon	1482092	1482205	-	ID=Jr10_02340_p1.exon3;Parent=Jr10_02340_p1
Chr10	CDS	1482092	1482205	-	ID=cds.Jr10_02340_p1;Parent=Jr10_02340_p1
Chr10	exon	1482353	1482877	-	ID=Jr10_02340_p1.exon2;Parent=Jr10_02340_p1
Chr10	CDS	1482353	1482877	-	ID=cds.Jr10_02340_p1;Parent=Jr10_02340_p1
Chr10	exon	1484598	1484699	-	ID=Jr10_02340_p1.exon1;Parent=Jr10_02340_p1
Chr10	CDS	1484598	1484699	-	ID=cds.Jr10_02340_p1;Parent=Jr10_02340_p1
Chr10	mRNA	3084958	3087411	-	ID=Jr10_04760_p1;Parent=Jr10_04760
Chr10	exon	3084958	3085453	-	ID=Jr10_04760_p1.exon2;Parent=Jr10_04760_p1
Chr10	three_prime_UTR	3084958	3085398	-	ID=Jr10_04760_p1.utr3;Parent=Jr10_04760_p1
Chr10	mRNA	3085275	3087250	-	ID=Jr10_04770_p1;Parent=Jr10_04770
Chr10	exon	3085275	3085436	-	ID=Jr10_04770_p1.exon2;Parent=Jr10_04770_p1
Chr10	CDS	3085277	3085436	-	ID=cds.Jr10_04770_p1;Parent=Jr10_04770_p1
Chr10	CDS	3085399	3085453	-	ID=cds.Jr10_04760_p1;Parent=Jr10_04760_p1
Chr10	exon	3086865	3087411	-	ID=Jr10_04760_p1.exon1;Parent=Jr10_04760_p1
Chr10	exon	3086865	3087250	-	ID=Jr10_04770_p1.exon1;Parent=Jr10_04770_p1
Chr10	CDS	3086865	3087250	-	ID=cds.Jr10_04760_p1;Parent=Jr10_04760_p1
Chr10	CDS	3086865	3087250	-	ID=cds.Jr10_04770_p1;Parent=Jr10_04770_p1
Chr10	five_prime_utr	3087251	3087411	-	ID=Jr10_04760_p1.utr5;Parent=Jr10_04760_p1
Chr10	mRNA	3097673	3100126	-	ID=Jr10_04790_p1;Parent=Jr10_04790
Chr10	exon	3097673	3098168	-	ID=Jr10_04790_p1.exon2;Parent=Jr10_04790_p1
Chr10	three_prime_UTR	3097673	3098113	-	ID=Jr10_04790_p1.utr3;Parent=Jr10_04790_p1
Chr10	CDS	3098114	3098168	-	ID=cds.Jr10_04790_p1;Parent=Jr10_04790_p1
Chr10	exon	3099580	3100126	-	ID=Jr10_04790_p1.exon1;Parent=Jr10_04790_p1
Chr10	CDS	3099580	3099965	-	ID=cds.Jr10_04790_p1;Parent=Jr10_04790_p1
Chr10	five_prime_utr	3099966	3100126	-	ID=Jr10_04790_p1.utr5;Parent=Jr10_04790_p1
Chr10	mRNA	8550090	8553895	-	ID=Jr10_10930_p1;Parent=Jr10_10930
Chr10	exon	8550090	8550264	-	ID=Jr10_10930_p1.exon3;Parent=Jr10_10930_p1
Chr10	CDS	8550090	8550264	-	ID=cds.Jr10_10930_p1;Parent=Jr10_10930_p1
Chr10	exon	8553191	8553424	-	ID=Jr10_10930_p1.exon2;Parent=Jr10_10930_p1
Chr10	CDS	8553191	8553424	-	ID=cds.Jr10_10930_p1;Parent=Jr10_10930_p1
Chr10	exon	8553588	8553895	-	ID=Jr10_10930_p1.exon1;Parent=Jr10_10930_p1
Chr10	CDS	8553588	8553895	-	ID=cds.Jr10_10930_p1;Parent=Jr10_10930_p1
Chr10	mRNA	8738533	8740998	+	ID=Jr10_11120_p1;Parent=Jr10_11120
Chr10	mRNA	8738533	8740998	+	ID=Jr10_11130_p1;Parent=Jr10_11120
Chr10	exon	8738533	8738786	+	ID=Jr10_11120_p1.exon1;Parent=Jr10_11120_p1
Chr10	exon	8738533	8738786	+	ID=Jr10_11130_p1.exon1;Parent=Jr10_11130_p1
Chr10	CDS	8738533	8738786	+	ID=cds.Jr10_11120_p1;Parent=Jr10_11120_p1
Chr10	CDS	8738533	8738786	+	ID=cds.Jr10_11130_p1;Parent=Jr10_11130_p1
Chr10	exon	8738861	8739013	+	ID=Jr10_11130_p1.exon2;Parent=Jr10_11130_p1
Chr10	CDS	8738861	8739013	+	ID=cds.Jr10_11130_p1;Parent=Jr10_11130_p1
Chr10	exon	8738867	8739013	+	ID=Jr10_11120_p1.exon2;Parent=Jr10_11120_p1
Chr10	CDS	8738867	8739013	+	ID=cds.Jr10_11120_p1;Parent=Jr10_11120_p1
Chr10	exon	8740734	8740998	+	ID=Jr10_11120_p1.exon3;Parent=Jr10_11120_p1
Chr10	exon	8740734	8740998	+	ID=Jr10_11130_p1.exon3;Parent=Jr10_11130_p1
Chr10	CDS	8740734	8740998	+	ID=cds.Jr10_11120_p1;Parent=Jr10_11120_p1
Chr10	CDS	8740734	8740998	+	ID=cds.Jr10_11130_p1;Parent=Jr10_11130_p1
Chr10	mRNA	12477876	12480398	+	ID=Jr10_13870_p1;Parent=Jr10_13870
Chr10	exon	12477876	12478223	+	ID=Jr10_13870_p1.exon1;Parent=Jr10_13870_p1
Chr10	CDS	12477876	12478223	+	ID=cds.Jr10_13870_p1;Parent=Jr10_13870_p1
Chr10	exon	12478320	12478418	+	ID=Jr10_13870_p1.exon2;Parent=Jr10_13870_p1
Chr10	CDS	12478320	12478418	+	ID=cds.Jr10_13870_p1;Parent=Jr10_13870_p1
Chr10	exon	12478544	12479134	+	ID=Jr10_13870_p1.exon3;Parent=Jr10_13870_p1
Chr10	CDS	12478544	12479134	+	ID=cds.Jr10_13870_p1;Parent=Jr10_13870_p1
Chr10	exon	12479225	12479338	+	ID=Jr10_13870_p1.exon4;Parent=Jr10_13870_p1
Chr10	CDS	12479225	12479338	+	ID=cds.Jr10_13870_p1;Parent=Jr10_13870_p1
Chr10	exon	12479682	12480398	+	ID=Jr10_13870_p1.exon5;Parent=Jr10_13870_p1
Chr10	CDS	12479682	12480398	+	ID=cds.Jr10_13870_p1;Parent=Jr10_13870_p1
Chr10	mRNA	37238142	37241717	+	ID=Jr10_25600_p1;Parent=Jr10_25600
Chr10	exon	37238142	37238342	+	ID=Jr10_25600_p1.exon1;Parent=Jr10_25600_p1
Chr10	five_prime_utr	37238142	37238342	+	ID=Jr10_25600_p1.utr5;Parent=Jr10_25600_p1
Chr10	exon	37239213	37239853	+	ID=Jr10_25600_p1.exon2;Parent=Jr10_25600_p1
Chr10	five_prime_utr	37239213	37239225	+	ID=Jr10_25600_p1.utr5;Parent=Jr10_25600_p1
Chr10	CDS	37239226	37239853	+	ID=cds.Jr10_25600_p1;Parent=Jr10_25600_p1
Chr10	exon	37239939	37240074	+	ID=Jr10_25600_p1.exon3;Parent=Jr10_25600_p1
Chr10	CDS	37239939	37240074	+	ID=cds.Jr10_25600_p1;Parent=Jr10_25600_p1
Chr10	exon	37240166	37240324	+	ID=Jr10_25600_p1.exon4;Parent=Jr10_25600_p1
Chr10	CDS	37240166	37240324	+	ID=cds.Jr10_25600_p1;Parent=Jr10_25600_p1
Chr10	exon	37240969	37241717	+	ID=Jr10_25600_p1.exon5;Parent=Jr10_25600_p1
Chr10	CDS	37240969	37241491	+	ID=cds.Jr10_25600_p1;Parent=Jr10_25600_p1
Chr10	three_prime_UTR	37241492	37241717	+	ID=Jr10_25600_p1.utr3;Parent=Jr10_25600_p1
Chr11	mRNA	25745364	25746820	+	ID=Jr11_16130_p1;Parent=Jr11_16130
Chr11	exon	25745364	25745673	+	ID=Jr11_16130_p1.exon1;Parent=Jr11_16130_p1
Chr11	five_prime_utr	25745364	25745560	+	ID=Jr11_16130_p1.utr5;Parent=Jr11_16130_p1
Chr11	mRNA	25745561	25746727	+	ID=Jr11_16150_p1;Parent=Jr11_16150
Chr11	exon	25745561	25745673	+	ID=Jr11_16150_p1.exon1;Parent=Jr11_16150_p1
Chr11	CDS	25745561	25745673	+	ID=cds.Jr11_16130_p1;Parent=Jr11_16130_p1
Chr11	CDS	25745561	25745673	+	ID=cds.Jr11_16150_p1;Parent=Jr11_16150_p1
Chr11	exon	25745789	25745938	+	ID=Jr11_16130_p1.exon2;Parent=Jr11_16130_p1
Chr11	CDS	25745789	25745938	+	ID=cds.Jr11_16130_p1;Parent=Jr11_16130_p1
Chr11	exon	25745795	25745938	+	ID=Jr11_16150_p1.exon2;Parent=Jr11_16150_p1
Chr11	CDS	25745795	25745938	+	ID=cds.Jr11_16150_p1;Parent=Jr11_16150_p1
Chr11	exon	25746160	25746820	+	ID=Jr11_16130_p1.exon3;Parent=Jr11_16130_p1
Chr11	exon	25746160	25746727	+	ID=Jr11_16150_p1.exon3;Parent=Jr11_16150_p1
Chr11	CDS	25746160	25746727	+	ID=cds.Jr11_16130_p1;Parent=Jr11_16130_p1
Chr11	CDS	25746160	25746727	+	ID=cds.Jr11_16150_p1;Parent=Jr11_16150_p1
Chr11	three_prime_UTR	25746728	25746820	+	ID=Jr11_16130_p1.utr3;Parent=Jr11_16130_p1
Chr11	mRNA	25888531	25890461	+	ID=Jr11_16330_p1;Parent=Jr11_16330
Chr11	exon	25888531	25889158	+	ID=Jr11_16330_p1.exon1;Parent=Jr11_16330_p1
Chr11	five_prime_utr	25888531	25888787	+	ID=Jr11_16330_p1.utr5;Parent=Jr11_16330_p1
Chr11	CDS	25888788	25889158	+	ID=cds.Jr11_16330_p1;Parent=Jr11_16330_p1
Chr11	exon	25889406	25889549	+	ID=Jr11_16330_p1.exon2;Parent=Jr11_16330_p1
Chr11	CDS	25889406	25889549	+	ID=cds.Jr11_16330_p1;Parent=Jr11_16330_p1
Chr11	exon	25889719	25890461	+	ID=Jr11_16330_p1.exon3;Parent=Jr11_16330_p1
Chr11	CDS	25889719	25890136	+	ID=cds.Jr11_16330_p1;Parent=Jr11_16330_p1
Chr11	three_prime_UTR	25890137	25890461	+	ID=Jr11_16330_p1.utr3;Parent=Jr11_16330_p1
Chr11	mRNA	26570411	26573847	-	ID=Jr11_17180_p1;Parent=Jr11_17180
Chr11	exon	26570411	26571287	-	ID=Jr11_17180_p1.exon6;Parent=Jr11_17180_p1
Chr11	three_prime_UTR	26570411	26570657	-	ID=Jr11_17180_p1.utr3;Parent=Jr11_17180_p1
Chr11	mRNA	26570658	26573807	-	ID=Jr11_17190_p1;Parent=Jr11_17190
Chr11	exon	26570658	26571287	-	ID=Jr11_17190_p1.exon6;Parent=Jr11_17190_p1
Chr11	CDS	26570658	26571287	-	ID=cds.Jr11_17180_p1;Parent=Jr11_17180_p1
Chr11	CDS	26570658	26571287	-	ID=cds.Jr11_17190_p1;Parent=Jr11_17190_p1
Chr11	exon	26571625	26571738	-	ID=Jr11_17180_p1.exon5;Parent=Jr11_17180_p1
Chr11	exon	26571625	26571738	-	ID=Jr11_17190_p1.exon5;Parent=Jr11_17190_p1
Chr11	CDS	26571625	26571738	-	ID=cds.Jr11_17180_p1;Parent=Jr11_17180_p1
Chr11	CDS	26571625	26571738	-	ID=cds.Jr11_17190_p1;Parent=Jr11_17190_p1
Chr11	exon	26571872	26572222	-	ID=Jr11_17180_p1.exon4;Parent=Jr11_17180_p1
Chr11	exon	26571872	26572222	-	ID=Jr11_17190_p1.exon4;Parent=Jr11_17190_p1
Chr11	CDS	26571872	26572222	-	ID=cds.Jr11_17180_p1;Parent=Jr11_17180_p1
Chr11	CDS	26571872	26572222	-	ID=cds.Jr11_17190_p1;Parent=Jr11_17190_p1
Chr11	exon	26573002	26573163	-	ID=Jr11_17190_p1.exon3;Parent=Jr11_17190_p1
Chr11	CDS	26573002	26573163	-	ID=cds.Jr11_17190_p1;Parent=Jr11_17190_p1
Chr11	exon	26573011	26573163	-	ID=Jr11_17180_p1.exon3;Parent=Jr11_17180_p1
Chr11	CDS	26573011	26573163	-	ID=cds.Jr11_17180_p1;Parent=Jr11_17180_p1
Chr11	exon	26573266	26573343	-	ID=Jr11_17180_p1.exon2;Parent=Jr11_17180_p1
Chr11	exon	26573266	26573343	-	ID=Jr11_17190_p1.exon2;Parent=Jr11_17190_p1
Chr11	CDS	26573266	26573343	-	ID=cds.Jr11_17180_p1;Parent=Jr11_17180_p1
Chr11	CDS	26573266	26573343	-	ID=cds.Jr11_17190_p1;Parent=Jr11_17190_p1
Chr11	exon	26573550	26573847	-	ID=Jr11_17180_p1.exon1;Parent=Jr11_17180_p1
Chr11	CDS	26573550	26573846	-	ID=cds.Jr11_17180_p1;Parent=Jr11_17180_p1
Chr11	exon	26573550	26573807	-	ID=Jr11_17190_p1.exon1;Parent=Jr11_17190_p1
Chr11	CDS	26573550	26573807	-	ID=cds.Jr11_17190_p1;Parent=Jr11_17190_p1
Chr11	mRNA	36399677	36401522	+	ID=Jr11_30170_p1;Parent=Jr11_30170
Chr11	exon	36399677	36399754	+	ID=Jr11_30170_p1.exon1;Parent=Jr11_30170_p1
Chr11	CDS	36399677	36399754	+	ID=cds.Jr11_30170_p1;Parent=Jr11_30170_p1
Chr11	exon	36399872	36399937	+	ID=Jr11_30170_p1.exon2;Parent=Jr11_30170_p1
Chr11	CDS	36399872	36399937	+	ID=cds.Jr11_30170_p1;Parent=Jr11_30170_p1
Chr11	exon	36400278	36400616	+	ID=Jr11_30170_p1.exon3;Parent=Jr11_30170_p1
Chr11	CDS	36400278	36400616	+	ID=cds.Jr11_30170_p1;Parent=Jr11_30170_p1
Chr11	exon	36400878	36400994	+	ID=Jr11_30170_p1.exon4;Parent=Jr11_30170_p1
Chr11	CDS	36400878	36400994	+	ID=cds.Jr11_30170_p1;Parent=Jr11_30170_p1
Chr11	exon	36401163	36401522	+	ID=Jr11_30170_p1.exon5;Parent=Jr11_30170_p1
Chr11	CDS	36401163	36401522	+	ID=cds.Jr11_30170_p1;Parent=Jr11_30170_p1
Chr11	mRNA	36419519	36421419	+	ID=Jr11_30180_p1;Parent=Jr11_30180
Chr11	exon	36419519	36419681	+	ID=Jr11_30180_p1.exon1;Parent=Jr11_30180_p1
Chr11	five_prime_utr	36419519	36419642	+	ID=Jr11_30180_p1.utr5;Parent=Jr11_30180_p1
Chr11	CDS	36419643	36419681	+	ID=cds.Jr11_30180_p1;Parent=Jr11_30180_p1
Chr11	exon	36419860	36420126	+	ID=Jr11_30180_p1.exon2;Parent=Jr11_30180_p1
Chr11	CDS	36419860	36420126	+	ID=cds.Jr11_30180_p1;Parent=Jr11_30180_p1
Chr11	exon	36420257	36420373	+	ID=Jr11_30180_p1.exon3;Parent=Jr11_30180_p1
Chr11	CDS	36420257	36420373	+	ID=cds.Jr11_30180_p1;Parent=Jr11_30180_p1
Chr11	exon	36420803	36421419	+	ID=Jr11_30180_p1.exon4;Parent=Jr11_30180_p1
Chr11	CDS	36420803	36421168	+	ID=cds.Jr11_30180_p1;Parent=Jr11_30180_p1
Chr11	three_prime_UTR	36421169	36421419	+	ID=Jr11_30180_p1.utr3;Parent=Jr11_30180_p1
Chr12	mRNA	5520814	5522483	+	ID=Jr12_04410_p1;Parent=Jr12_04410
Chr12	exon	5520814	5521360	+	ID=Jr12_04410_p1.exon1;Parent=Jr12_04410_p1
Chr12	five_prime_utr	5520814	5520947	+	ID=Jr12_04410_p1.utr5;Parent=Jr12_04410_p1
Chr12	CDS	5520948	5521360	+	ID=cds.Jr12_04410_p1;Parent=Jr12_04410_p1
Chr12	exon	5521541	5521651	+	ID=Jr12_04410_p1.exon2;Parent=Jr12_04410_p1
Chr12	CDS	5521541	5521651	+	ID=cds.Jr12_04410_p1;Parent=Jr12_04410_p1
Chr12	exon	5521758	5522483	+	ID=Jr12_04410_p1.exon3;Parent=Jr12_04410_p1
Chr12	CDS	5521758	5522244	+	ID=cds.Jr12_04410_p1;Parent=Jr12_04410_p1
Chr12	three_prime_UTR	5522245	5522483	+	ID=Jr12_04410_p1.utr3;Parent=Jr12_04410_p1
Chr12	mRNA	5550188	5552620	+	ID=Jr12_04430_p1;Parent=Jr12_04430
Chr12	exon	5550188	5550645	+	ID=Jr12_04430_p1.exon1;Parent=Jr12_04430_p1
Chr12	CDS	5550188	5550645	+	ID=cds.Jr12_04430_p1;Parent=Jr12_04430_p1
Chr12	exon	5552443	5552620	+	ID=Jr12_04430_p1.exon2;Parent=Jr12_04430_p1
Chr12	CDS	5552443	5552620	+	ID=cds.Jr12_04430_p1;Parent=Jr12_04430_p1
Chr12	mRNA	19447466	19449375	-	ID=Jr12_10150_p1;Parent=Jr12_10150
Chr12	exon	19447466	19448262	-	ID=Jr12_10150_p1.exon3;Parent=Jr12_10150_p1
Chr12	three_prime_UTR	19447466	19447841	-	ID=Jr12_10150_p1.utr3;Parent=Jr12_10150_p1
Chr12	CDS	19447842	19448262	-	ID=cds.Jr12_10150_p1;Parent=Jr12_10150_p1
Chr12	exon	19448382	19448525	-	ID=Jr12_10150_p1.exon2;Parent=Jr12_10150_p1
Chr12	CDS	19448382	19448525	-	ID=cds.Jr12_10150_p1;Parent=Jr12_10150_p1
Chr12	exon	19448801	19449375	-	ID=Jr12_10150_p1.exon1;Parent=Jr12_10150_p1
Chr12	CDS	19448801	19449213	-	ID=cds.Jr12_10150_p1;Parent=Jr12_10150_p1
Chr12	five_prime_utr	19449214	19449375	-	ID=Jr12_10150_p1.utr5;Parent=Jr12_10150_p1
Chr12	mRNA	28363647	28365189	+	ID=Jr12_20670_p1;Parent=Jr12_20670
Chr12	exon	28363647	28363730	+	ID=Jr12_20670_p1.exon1;Parent=Jr12_20670_p1
Chr12	CDS	28363647	28363730	+	ID=cds.Jr12_20670_p1;Parent=Jr12_20670_p1
Chr12	exon	28363827	28363886	+	ID=Jr12_20670_p1.exon2;Parent=Jr12_20670_p1
Chr12	CDS	28363827	28363886	+	ID=cds.Jr12_20670_p1;Parent=Jr12_20670_p1
Chr12	exon	28364004	28364348	+	ID=Jr12_20670_p1.exon3;Parent=Jr12_20670_p1
Chr12	CDS	28364004	28364348	+	ID=cds.Jr12_20670_p1;Parent=Jr12_20670_p1
Chr12	exon	28364475	28364591	+	ID=Jr12_20670_p1.exon4;Parent=Jr12_20670_p1
Chr12	CDS	28364475	28364591	+	ID=cds.Jr12_20670_p1;Parent=Jr12_20670_p1
Chr12	exon	28364827	28365189	+	ID=Jr12_20670_p1.exon5;Parent=Jr12_20670_p1
Chr12	CDS	28364827	28365189	+	ID=cds.Jr12_20670_p1;Parent=Jr12_20670_p1
Chr12	mRNA	31372547	31374933	+	ID=Jr12_25170_p1;Parent=Jr12_25170
Chr12	exon	31372547	31373091	+	ID=Jr12_25170_p1.exon1;Parent=Jr12_25170_p1
Chr12	CDS	31372547	31373091	+	ID=cds.Jr12_25170_p1;Parent=Jr12_25170_p1
Chr12	exon	31373698	31373829	+	ID=Jr12_25170_p1.exon2;Parent=Jr12_25170_p1
Chr12	CDS	31373698	31373829	+	ID=cds.Jr12_25170_p1;Parent=Jr12_25170_p1
Chr12	exon	31374462	31374933	+	ID=Jr12_25170_p1.exon3;Parent=Jr12_25170_p1
Chr12	CDS	31374462	31374933	+	ID=cds.Jr12_25170_p1;Parent=Jr12_25170_p1
Chr13	mRNA	3714737	3717166	-	ID=Jr13_05050_p1;Parent=Jr13_05050
Chr13	exon	3714737	3715622	-	ID=Jr13_05050_p1.exon5;Parent=Jr13_05050_p1
Chr13	three_prime_UTR	3714737	3714890	-	ID=Jr13_05050_p1.utr3;Parent=Jr13_05050_p1
Chr13	CDS	3714891	3715622	-	ID=cds.Jr13_05050_p1;Parent=Jr13_05050_p1
Chr13	exon	3715758	3715874	-	ID=Jr13_05050_p1.exon4;Parent=Jr13_05050_p1
Chr13	CDS	3715758	3715874	-	ID=cds.Jr13_05050_p1;Parent=Jr13_05050_p1
Chr13	exon	3715998	3716345	-	ID=Jr13_05050_p1.exon3;Parent=Jr13_05050_p1
Chr13	CDS	3715998	3716345	-	ID=cds.Jr13_05050_p1;Parent=Jr13_05050_p1
Chr13	exon	3716465	3716602	-	ID=Jr13_05050_p1.exon2;Parent=Jr13_05050_p1
Chr13	CDS	3716465	3716602	-	ID=cds.Jr13_05050_p1;Parent=Jr13_05050_p1
Chr13	exon	3716845	3717166	-	ID=Jr13_05050_p1.exon1;Parent=Jr13_05050_p1
Chr13	CDS	3716845	3717165	-	ID=cds.Jr13_05050_p1;Parent=Jr13_05050_p1
Chr13	mRNA	8855121	8857376	+	ID=Jr13_12290_p1;Parent=Jr13_12290
Chr13	exon	8855121	8855494	+	ID=Jr13_12290_p1.exon1;Parent=Jr13_12290_p1
Chr13	CDS	8855121	8855494	+	ID=cds.Jr13_12290_p1;Parent=Jr13_12290_p1
Chr13	exon	8857199	8857376	+	ID=Jr13_12290_p1.exon2;Parent=Jr13_12290_p1
Chr13	CDS	8857199	8857376	+	ID=cds.Jr13_12290_p1;Parent=Jr13_12290_p1
Chr13	mRNA	11025219	11028382	-	ID=Jr13_14610_p1;Parent=Jr13_14610
Chr13	exon	11025219	11025582	-	ID=Jr13_14610_p1.exon3;Parent=Jr13_14610_p1
Chr13	CDS	11025219	11025582	-	ID=cds.Jr13_14610_p1;Parent=Jr13_14610_p1
Chr13	exon	11026139	11026282	-	ID=Jr13_14610_p1.exon2;Parent=Jr13_14610_p1
Chr13	CDS	11026139	11026282	-	ID=cds.Jr13_14610_p1;Parent=Jr13_14610_p1
Chr13	exon	11027973	11028382	-	ID=Jr13_14610_p1.exon1;Parent=Jr13_14610_p1
Chr13	CDS	11027973	11028382	-	ID=cds.Jr13_14610_p1;Parent=Jr13_14610_p1
Chr13	mRNA	11223425	11228243	+	ID=Jr13_14850_p1;Parent=Jr13_14850
Chr13	exon	11223425	11223910	+	ID=Jr13_14850_p1.exon1;Parent=Jr13_14850_p1
Chr13	CDS	11223425	11223910	+	ID=cds.Jr13_14850_p1;Parent=Jr13_14850_p1
Chr13	exon	11226028	11226749	+	ID=Jr13_14850_p1.exon2;Parent=Jr13_14850_p1
Chr13	CDS	11226028	11226749	+	ID=cds.Jr13_14850_p1;Parent=Jr13_14850_p1
Chr13	exon	11226852	11227010	+	ID=Jr13_14850_p1.exon3;Parent=Jr13_14850_p1
Chr13	CDS	11226852	11227010	+	ID=cds.Jr13_14850_p1;Parent=Jr13_14850_p1
Chr13	exon	11227961	11228243	+	ID=Jr13_14850_p1.exon4;Parent=Jr13_14850_p1
Chr13	CDS	11227961	11228243	+	ID=cds.Jr13_14850_p1;Parent=Jr13_14850_p1
Chr13	mRNA	12731309	12734607	-	ID=Jr13_16070_p1;Parent=Jr13_16070
Chr13	exon	12731309	12732292	-	ID=Jr13_16070_p1.exon5;Parent=Jr13_16070_p1
Chr13	CDS	12731309	12732292	-	ID=cds.Jr13_16070_p1;Parent=Jr13_16070_p1
Chr13	exon	12732500	12732613	-	ID=Jr13_16070_p1.exon4;Parent=Jr13_16070_p1
Chr13	CDS	12732500	12732613	-	ID=cds.Jr13_16070_p1;Parent=Jr13_16070_p1
Chr13	exon	12732828	12733364	-	ID=Jr13_16070_p1.exon3;Parent=Jr13_16070_p1
Chr13	CDS	12732828	12733364	-	ID=cds.Jr13_16070_p1;Parent=Jr13_16070_p1
Chr13	exon	12733517	12733579	-	ID=Jr13_16070_p1.exon2;Parent=Jr13_16070_p1
Chr13	CDS	12733517	12733579	-	ID=cds.Jr13_16070_p1;Parent=Jr13_16070_p1
Chr13	exon	12734563	12734607	-	ID=Jr13_16070_p1.exon1;Parent=Jr13_16070_p1
Chr13	CDS	12734563	12734607	-	ID=cds.Jr13_16070_p1;Parent=Jr13_16070_p1
Chr13	mRNA	38810913	38813261	+	ID=Jr13_30130_p1;Parent=Jr13_30130
Chr13	exon	38810913	38811229	+	ID=Jr13_30130_p1.exon1;Parent=Jr13_30130_p1
Chr13	CDS	38810913	38811229	+	ID=cds.Jr13_30130_p1;Parent=Jr13_30130_p1
Chr13	exon	38811333	38811464	+	ID=Jr13_30130_p1.exon2;Parent=Jr13_30130_p1
Chr13	CDS	38811333	38811464	+	ID=cds.Jr13_30130_p1;Parent=Jr13_30130_p1
Chr13	exon	38812568	38813261	+	ID=Jr13_30130_p1.exon3;Parent=Jr13_30130_p1
Chr13	CDS	38812568	38813261	+	ID=cds.Jr13_30130_p1;Parent=Jr13_30130_p1
Chr13	mRNA	39301424	39302974	-	ID=Jr13_30630_p1;Parent=Jr13_30630
Chr13	exon	39301424	39302030	-	ID=Jr13_30630_p1.exon3;Parent=Jr13_30630_p1
Chr13	CDS	39301424	39302030	-	ID=cds.Jr13_30630_p1;Parent=Jr13_30630_p1
Chr13	exon	39302134	39302247	-	ID=Jr13_30630_p1.exon2;Parent=Jr13_30630_p1
Chr13	CDS	39302134	39302247	-	ID=cds.Jr13_30630_p1;Parent=Jr13_30630_p1
Chr13	exon	39302382	39302974	-	ID=Jr13_30630_p1.exon1;Parent=Jr13_30630_p1
Chr13	CDS	39302382	39302974	-	ID=cds.Jr13_30630_p1;Parent=Jr13_30630_p1
Chr14	mRNA	2169100	2174952	+	ID=Jr14_02960_p1;Parent=Jr14_02960
Chr14	exon	2169100	2169384	+	ID=Jr14_02960_p1.exon1;Parent=Jr14_02960_p1
Chr14	CDS	2169100	2169384	+	ID=cds.Jr14_02960_p1;Parent=Jr14_02960_p1
Chr14	exon	2169587	2169660	+	ID=Jr14_02960_p1.exon2;Parent=Jr14_02960_p1
Chr14	CDS	2169587	2169660	+	ID=cds.Jr14_02960_p1;Parent=Jr14_02960_p1
Chr14	exon	2170155	2170316	+	ID=Jr14_02960_p1.exon3;Parent=Jr14_02960_p1
Chr14	CDS	2170155	2170316	+	ID=cds.Jr14_02960_p1;Parent=Jr14_02960_p1
Chr14	exon	2174790	2174952	+	ID=Jr14_02960_p1.exon4;Parent=Jr14_02960_p1
Chr14	CDS	2174790	2174952	+	ID=cds.Jr14_02960_p1;Parent=Jr14_02960_p1
Chr14	mRNA	6182197	6185468	+	ID=Jr14_08090_p1;Parent=Jr14_08090
Chr14	exon	6182197	6182657	+	ID=Jr14_08090_p1.exon1;Parent=Jr14_08090_p1
Chr14	five_prime_utr	6182197	6182306	+	ID=Jr14_08090_p1.utr5;Parent=Jr14_08090_p1
Chr14	mRNA	6182307	6185461	+	ID=Jr14_08100_p1;Parent=Jr14_08100
Chr14	exon	6182307	6182657	+	ID=Jr14_08100_p1.exon1;Parent=Jr14_08100_p1
Chr14	CDS	6182307	6182657	+	ID=cds.Jr14_08090_p1;Parent=Jr14_08090_p1
Chr14	CDS	6182307	6182657	+	ID=cds.Jr14_08100_p1;Parent=Jr14_08100_p1
Chr14	exon	6183056	6183241	+	ID=Jr14_08090_p1.exon2;Parent=Jr14_08090_p1
Chr14	exon	6183056	6183241	+	ID=Jr14_08100_p1.exon2;Parent=Jr14_08100_p1
Chr14	CDS	6183056	6183241	+	ID=cds.Jr14_08090_p1;Parent=Jr14_08090_p1
Chr14	CDS	6183056	6183241	+	ID=cds.Jr14_08100_p1;Parent=Jr14_08100_p1
Chr14	exon	6183330	6183979	+	ID=Jr14_08090_p1.exon3;Parent=Jr14_08090_p1
Chr14	CDS	6183330	6183979	+	ID=cds.Jr14_08090_p1;Parent=Jr14_08090_p1
Chr14	exon	6183339	6183979	+	ID=Jr14_08100_p1.exon3;Parent=Jr14_08100_p1
Chr14	CDS	6183339	6183979	+	ID=cds.Jr14_08100_p1;Parent=Jr14_08100_p1
Chr14	exon	6184071	6184232	+	ID=Jr14_08090_p1.exon4;Parent=Jr14_08090_p1
Chr14	exon	6184071	6184232	+	ID=Jr14_08100_p1.exon4;Parent=Jr14_08100_p1
Chr14	CDS	6184071	6184232	+	ID=cds.Jr14_08090_p1;Parent=Jr14_08090_p1
Chr14	CDS	6184071	6184232	+	ID=cds.Jr14_08100_p1;Parent=Jr14_08100_p1
Chr14	exon	6184647	6185468	+	ID=Jr14_08090_p1.exon5;Parent=Jr14_08090_p1
Chr14	exon	6184647	6185461	+	ID=Jr14_08100_p1.exon5;Parent=Jr14_08100_p1
Chr14	CDS	6184647	6185106	+	ID=cds.Jr14_08090_p1;Parent=Jr14_08090_p1
Chr14	CDS	6184647	6185106	+	ID=cds.Jr14_08100_p1;Parent=Jr14_08100_p1
Chr14	three_prime_UTR	6185107	6185468	+	ID=Jr14_08090_p1.utr3;Parent=Jr14_08090_p1
Chr14	three_prime_UTR	6185107	6185461	+	ID=Jr14_08100_p1.utr3;Parent=Jr14_08100_p1
Chr14	mRNA	28463523	28465452	-	ID=Jr14_22100_p1;Parent=Jr14_22100
Chr14	exon	28463523	28463814	-	ID=Jr14_22100_p1.exon3;Parent=Jr14_22100_p1
Chr14	CDS	28463523	28463814	-	ID=cds.Jr14_22100_p1;Parent=Jr14_22100_p1
Chr14	exon	28464079	28464219	-	ID=Jr14_22100_p1.exon2;Parent=Jr14_22100_p1
Chr14	CDS	28464079	28464219	-	ID=cds.Jr14_22100_p1;Parent=Jr14_22100_p1
Chr14	exon	28465418	28465452	-	ID=Jr14_22100_p1.exon1;Parent=Jr14_22100_p1
Chr14	CDS	28465418	28465452	-	ID=cds.Jr14_22100_p1;Parent=Jr14_22100_p1
Chr15	mRNA	19296620	19303172	-	ID=Jr15_12650_p1;Parent=Jr15_12650
Chr15	mRNA	19296620	19303172	-	ID=Jr15_12660_p1;Parent=Jr15_12650
Chr15	exon	19296620	19297276	-	ID=Jr15_12650_p1.exon5;Parent=Jr15_12650_p1
Chr15	exon	19296620	19297276	-	ID=Jr15_12660_p1.exon5;Parent=Jr15_12660_p1
Chr15	three_prime_UTR	19296620	19296918	-	ID=Jr15_12650_p1.utr3;Parent=Jr15_12650_p1
Chr15	three_prime_UTR	19296620	19296918	-	ID=Jr15_12660_p1.utr3;Parent=Jr15_12660_p1
Chr15	mRNA	19296635	19303172	-	ID=Jr15_12670_p1;Parent=Jr15_12670
Chr15	exon	19296635	19297276	-	ID=Jr15_12670_p1.exon5;Parent=Jr15_12670_p1
Chr15	three_prime_UTR	19296635	19296918	-	ID=Jr15_12670_p1.utr3;Parent=Jr15_12670_p1
Chr15	CDS	19296919	19297276	-	ID=cds.Jr15_12650_p1;Parent=Jr15_12650_p1
Chr15	CDS	19296919	19297276	-	ID=cds.Jr15_12660_p1;Parent=Jr15_12660_p1
Chr15	CDS	19296919	19297276	-	ID=cds.Jr15_12670_p1;Parent=Jr15_12670_p1
Chr15	exon	19297939	19298097	-	ID=Jr15_12650_p1.exon4;Parent=Jr15_12650_p1
Chr15	exon	19297939	19298097	-	ID=Jr15_12660_p1.exon4;Parent=Jr15_12660_p1
Chr15	exon	19297939	19298097	-	ID=Jr15_12670_p1.exon4;Parent=Jr15_12670_p1
Chr15	CDS	19297939	19298097	-	ID=cds.Jr15_12650_p1;Parent=Jr15_12650_p1
Chr15	CDS	19297939	19298097	-	ID=cds.Jr15_12660_p1;Parent=Jr15_12660_p1
Chr15	CDS	19297939	19298097	-	ID=cds.Jr15_12670_p1;Parent=Jr15_12670_p1
Chr15	exon	19298192	19298889	-	ID=Jr15_12650_p1.exon3;Parent=Jr15_12650_p1
Chr15	exon	19298192	19298889	-	ID=Jr15_12660_p1.exon3;Parent=Jr15_12660_p1
Chr15	exon	19298192	19298889	-	ID=Jr15_12670_p1.exon3;Parent=Jr15_12670_p1
Chr15	CDS	19298192	19298889	-	ID=cds.Jr15_12650_p1;Parent=Jr15_12650_p1
Chr15	CDS	19298192	19298889	-	ID=cds.Jr15_12670_p1;Parent=Jr15_12670_p1
Chr15	CDS	19298192	19298688	-	ID=cds.Jr15_12660_p1;Parent=Jr15_12660_p1
Chr15	five_prime_utr	19298689	19298889	-	ID=Jr15_12660_p1.utr5;Parent=Jr15_12660_p1
Chr15	exon	19302666	19302715	-	ID=Jr15_12650_p1.exon2;Parent=Jr15_12650_p1
Chr15	exon	19302666	19302715	-	ID=Jr15_12660_p1.exon2;Parent=Jr15_12660_p1
Chr15	exon	19302666	19302715	-	ID=Jr15_12670_p1.exon2;Parent=Jr15_12670_p1
Chr15	CDS	19302666	19302715	-	ID=cds.Jr15_12650_p1;Parent=Jr15_12650_p1
Chr15	CDS	19302666	19302715	-	ID=cds.Jr15_12670_p1;Parent=Jr15_12670_p1
Chr15	five_prime_utr	19302666	19302715	-	ID=Jr15_12660_p1.utr5;Parent=Jr15_12660_p1
Chr15	exon	19302844	19303172	-	ID=Jr15_12670_p1.exon1;Parent=Jr15_12670_p1
Chr15	CDS	19302844	19303135	-	ID=cds.Jr15_12670_p1;Parent=Jr15_12670_p1
Chr15	exon	19302848	19303172	-	ID=Jr15_12660_p1.exon1;Parent=Jr15_12660_p1
Chr15	five_prime_utr	19302848	19303172	-	ID=Jr15_12660_p1.utr5;Parent=Jr15_12660_p1
Chr15	exon	19302850	19303172	-	ID=Jr15_12650_p1.exon1;Parent=Jr15_12650_p1
Chr15	CDS	19302850	19303135	-	ID=cds.Jr15_12650_p1;Parent=Jr15_12650_p1
Chr15	five_prime_utr	19303136	19303172	-	ID=Jr15_12650_p1.utr5;Parent=Jr15_12650_p1
Chr15	five_prime_utr	19303136	19303172	-	ID=Jr15_12670_p1.utr5;Parent=Jr15_12670_p1
Chr16	mRNA	1131748	1133569	-	ID=Jr16_00890_p1;Parent=Jr16_00890
Chr16	exon	1131748	1132456	-	ID=Jr16_00890_p1.exon3;Parent=Jr16_00890_p1
Chr16	CDS	1131748	1132456	-	ID=cds.Jr16_00890_p1;Parent=Jr16_00890_p1
Chr16	exon	1132950	1133078	-	ID=Jr16_00890_p1.exon2;Parent=Jr16_00890_p1
Chr16	CDS	1132950	1133078	-	ID=cds.Jr16_00890_p1;Parent=Jr16_00890_p1
Chr16	exon	1133244	1133569	-	ID=Jr16_00890_p1.exon1;Parent=Jr16_00890_p1
Chr16	CDS	1133244	1133569	-	ID=cds.Jr16_00890_p1;Parent=Jr16_00890_p1
Chr16	mRNA	20417195	20420258	-	ID=Jr16_12390_p1;Parent=Jr16_12390
Chr16	exon	20417195	20417477	-	ID=Jr16_12390_p1.exon4;Parent=Jr16_12390_p1
Chr16	CDS	20417195	20417477	-	ID=cds.Jr16_12390_p1;Parent=Jr16_12390_p1
Chr16	exon	20418375	20418533	-	ID=Jr16_12390_p1.exon3;Parent=Jr16_12390_p1
Chr16	CDS	20418375	20418533	-	ID=cds.Jr16_12390_p1;Parent=Jr16_12390_p1
Chr16	exon	20418638	20419266	-	ID=Jr16_12390_p1.exon2;Parent=Jr16_12390_p1
Chr16	CDS	20418638	20419266	-	ID=cds.Jr16_12390_p1;Parent=Jr16_12390_p1
Chr16	exon	20419764	20420258	-	ID=Jr16_12390_p1.exon1;Parent=Jr16_12390_p1
Chr16	CDS	20419764	20420258	-	ID=cds.Jr16_12390_p1;Parent=Jr16_12390_p1
Chr16	mRNA	20622128	20623229	+	ID=Jr16_12590_p1;Parent=Jr16_12590
Chr16	exon	20622128	20622270	+	ID=Jr16_12590_p1.exon1;Parent=Jr16_12590_p1
Chr16	CDS	20622128	20622270	+	ID=cds.Jr16_12590_p1;Parent=Jr16_12590_p1
Chr16	exon	20622773	20623229	+	ID=Jr16_12590_p1.exon2;Parent=Jr16_12590_p1
Chr16	CDS	20622773	20623229	+	ID=cds.Jr16_12590_p1;Parent=Jr16_12590_p1
Chr16	mRNA	22244802	22251576	-	ID=Jr16_14290_p1;Parent=Jr16_14290
Chr16	exon	22244802	22245387	-	ID=Jr16_14290_p1.exon2;Parent=Jr16_14290_p1
Chr16	three_prime_UTR	22244802	22245209	-	ID=Jr16_14290_p1.utr3;Parent=Jr16_14290_p1
Chr16	CDS	22245210	22245387	-	ID=cds.Jr16_14290_p1;Parent=Jr16_14290_p1
Chr16	exon	22251136	22251576	-	ID=Jr16_14290_p1.exon1;Parent=Jr16_14290_p1
Chr16	CDS	22251136	22251503	-	ID=cds.Jr16_14290_p1;Parent=Jr16_14290_p1
Chr16	five_prime_utr	22251504	22251576	-	ID=Jr16_14290_p1.utr5;Parent=Jr16_14290_p1
Chr16	mRNA	26544566	26546702	+	ID=Jr16_19690_p1;Parent=Jr16_19690
Chr16	exon	26544566	26544853	+	ID=Jr16_19690_p1.exon1;Parent=Jr16_19690_p1
Chr16	CDS	26544566	26544853	+	ID=cds.Jr16_19690_p1;Parent=Jr16_19690_p1
Chr16	exon	26545003	26545143	+	ID=Jr16_19690_p1.exon2;Parent=Jr16_19690_p1
Chr16	CDS	26545003	26545143	+	ID=cds.Jr16_19690_p1;Parent=Jr16_19690_p1
Chr16	exon	26545244	26545615	+	ID=Jr16_19690_p1.exon3;Parent=Jr16_19690_p1
Chr16	CDS	26545244	26545615	+	ID=cds.Jr16_19690_p1;Parent=Jr16_19690_p1
Chr16	exon	26545731	26545844	+	ID=Jr16_19690_p1.exon4;Parent=Jr16_19690_p1
Chr16	CDS	26545731	26545844	+	ID=cds.Jr16_19690_p1;Parent=Jr16_19690_p1
Chr16	exon	26545962	26546702	+	ID=Jr16_19690_p1.exon5;Parent=Jr16_19690_p1
Chr16	CDS	26545962	26546702	+	ID=cds.Jr16_19690_p1;Parent=Jr16_19690_p1
