# Supplementary material for: Genome-Wide Identification and Transcriptional Expression Profiles of Transcription Factor WRKY in Common Walnut (Juglans regia L.)
Source: Genes (Basel). 2021 Sep 19;12(9):1444. doi: 10.3390/genes12091444 (PMC8466090; doi:10.3390/genes12091444)
Supplement: Supplementary file 1 [file genes-12-01444-s001.zip › TableS5.xlsx]

## Sheet: Sheet1
TableS5. The collinearity in J.regia and their related information
Gene id1	Chr	Start	End	Gene id2	Chr	Start	End
Jr01_11760_p1	Chr01	8922656	8922734	Jr02_18730_p1	Chr02	31773515	31773581
Jr01_11820_p1	Chr01	8973384	8973516	Jr02_18640_p1	Chr02	31675645	31676181
Jr01_11900_p1	Chr01	9039643	9041310	Jr02_18590_p1	Chr02	31611653	31613278
Jr01_11960_p1	Chr01	9097924	9098843	Jr02_18570_p1	Chr02	31596266	31597207
Jr01_11990_p1	Chr01	9114738	9115061	Jr02_18560_p1	Chr02	31591377	31591614
Jr01_12040_p1	Chr01	9163168	9163415	Jr02_18470_p1	Chr02	31498573	31498703
Jr01_12060_p1	Chr01	9170058	9170179	Jr02_18460_p1	Chr02	31490694	31491062
Jr01_12140_p1	Chr01	9247146	9247391	Jr02_18380_p1	Chr02	31411522	31412295
Jr01_12190_p1	Chr01	9280801	9280883	Jr02_18370_p1	Chr02	31402973	31403184
Jr01_12220_p1	Chr01	9306113	9306193	Jr02_18310_p1	Chr02	31372849	31374572
Jr01_12320_p1	Chr01	9403962	9404343	Jr02_18220_p1	Chr02	31330820	31330961
Jr01_12350_p1	Chr01	9429663	9429906	Jr02_18180_p1	Chr02	31294852	31294929
Jr01_12440_p1	Chr01	9467797	9468159	Jr02_18150_p1	Chr02	31248602	31248754
Jr01_12470_p1	Chr01	9498854	9499258	Jr02_18120_p1	Chr02	31210684	31210885
Jr01_12480_p1	Chr01	9502296	9502373	Jr02_18100_p1	Chr02	31201506	31201836
Jr01_03980_p1	Chr01	2959339	2959437	Jr02_03870_p1	Chr02	3596892	3596974
Jr01_04010_p1	Chr01	2972669	2973228	Jr02_03830_p1	Chr02	3568715	3569999
Jr01_04020_p1	Chr01	2976917	2978011	Jr02_03820_p1	Chr02	3562413	3563492
Jr01_04060_p1	Chr01	3012621	3013010	Jr02_03740_p1	Chr02	3497439	3497918
Jr01_04090_p1	Chr01	3036989	3037720	Jr02_03700_p1	Chr02	3471215	3471619
Jr01_04140_p1	Chr01	3095325	3095417	Jr02_03690_p1	Chr02	3466755	3466881
Jr01_04160_p1	Chr01	3112151	3112282	Jr02_03600_p1	Chr02	3296792	3297118
Jr01_04240_p1	Chr01	3142558	3142828	Jr02_03490_p1	Chr02	3222002	3222627
Jr01_04300_p1	Chr01	3192879	3193092	Jr02_03470_p1	Chr02	3198879	3198901
Jr01_19800_p1	Chr01	19106435	19106769	Jr02_23160_p1	Chr02	35180847	35181114
Jr01_19810_p1	Chr01	19177486	19177851	Jr02_23090_p1	Chr02	35095676	35096026
Jr01_19900_p1	Chr01	19318623	19318824	Jr02_22970_p1	Chr02	35047923	35048615
Jr01_19950_p1	Chr01	19369016	19369750	Jr02_22950_p1	Chr02	35045919	35046250
Jr01_19980_p1	Chr01	19495520	19495732	Jr02_22900_p1	Chr02	35020060	35020656
Jr01_20050_p1	Chr01	19677669	19677801	Jr02_22860_p1	Chr02	34983552	34984419
Jr01_20180_p1	Chr01	20027077	20027316	Jr02_22820_p1	Chr02	34951307	34951473
Jr01_18630_p1	Chr01	17266101	17266160	Jr02_24830_p1	Chr02	36446559	36446788
Jr01_18660_p1	Chr01	17294378	17294575	Jr02_24820_p1	Chr02	36442119	36442391
Jr01_18710_p1	Chr01	17318150	17318356	Jr02_24790_p1	Chr02	36418286	36418396
Jr01_18760_p1	Chr01	17367757	17367841	Jr02_24670_p1	Chr02	36358907	36358946
Jr01_18770_p1	Chr01	17375740	17377032	Jr02_24650_p1	Chr02	36348742	36350109
Jr01_18800_p1	Chr01	17467133	17467547	Jr02_24610_p1	Chr02	36330792	36330986
Jr01_21420_p1	Chr01	22620973	22621300	Jr03_07500_p1	Chr03	5667489	5667841
Jr01_21460_p1	Chr01	22682301	22682327	Jr03_07550_p1	Chr03	5696861	5696917
Jr01_21550_p1	Chr01	22949452	22949619	Jr03_07610_p1	Chr03	5742744	5742912
Jr01_21590_p1	Chr01	23011140	23011430	Jr03_07650_p1	Chr03	5782687	5783039
Jr01_21660_p1	Chr01	23172652	23173452	Jr03_07680_p1	Chr03	5807672	5807745
Jr01_21730_p1	Chr01	23264061	23264306	Jr03_07690_p1	Chr03	5821907	5822187
Jr01_21740_p1	Chr01	23308857	23308971	Jr03_07700_p1	Chr03	5835301	5835460
Jr01_21770_p1	Chr01	23365796	23366443	Jr03_07750_p1	Chr03	5845368	5846000
Jr01_21780_p1	Chr01	23480633	23480691	Jr03_07760_p1	Chr03	5871983	5872238
Jr01_21850_p1	Chr01	23688365	23688915	Jr03_07780_p1	Chr03	5891744	5892315
Jr01_21980_p1	Chr01	24184513	24184623	Jr03_07870_p1	Chr03	5985403	5985561
Jr01_21990_p1	Chr01	24214058	24214572	Jr03_07900_p1	Chr03	5992467	5993014
Jr01_22020_p1	Chr01	24249892	24250177	Jr03_07980_p1	Chr03	6023232	6023429
Jr01_22040_p1	Chr01	24338630	24338728	Jr03_08000_p1	Chr03	6051372	6051470
Jr01_22050_p1	Chr01	24384035	24384688	Jr03_08020_p1	Chr03	6052530	6053234
Jr01_22130_p1	Chr01	24572850	24572997	Jr03_08140_p1	Chr03	6128851	6128947
Jr01_19890_p1	Chr01	19304700	19306098	Jr03_18790_p1	Chr03	18816556	18817834
Jr01_19900_p1	Chr01	19318623	19318824	Jr03_18820_p1	Chr03	18900899	18901351
Jr01_19950_p1	Chr01	19369016	19369750	Jr03_18840_p1	Chr03	18936386	18937046
Jr01_19990_p1	Chr01	19544519	19545407	Jr03_18870_p1	Chr03	18970964	18971465
Jr01_20010_p1	Chr01	19594025	19594214	Jr03_18880_p1	Chr03	18991421	18991597
Jr01_20020_p1	Chr01	19648064	19648075	Jr03_18910_p1	Chr03	19052652	19052765
Jr01_20050_p1	Chr01	19677669	19677801	Jr03_18950_p1	Chr03	19153201	19153552
Jr01_18510_p1	Chr01	17078967	17079165	Jr03_11840_p1	Chr03	9147133	9147378
Jr01_18520_p1	Chr01	17107616	17107695	Jr03_11820_p1	Chr03	9125651	9126418
Jr01_18600_p1	Chr01	17261284	17261544	Jr03_11680_p1	Chr03	9046227	9046537
Jr01_18750_p1	Chr01	17355967	17356096	Jr03_11540_p1	Chr03	8968628	8969068
Jr01_18760_p1	Chr01	17367757	17367841	Jr03_11530_p1	Chr03	8955302	8955506
Jr01_18770_p1	Chr01	17375740	17377032	Jr03_11520_p1	Chr03	8930944	8932314
Jr01_18800_p1	Chr01	17467133	17467547	Jr03_11430_p1	Chr03	8862204	8862254
Jr01_18880_p1	Chr01	17544042	17544387	Jr03_11310_p1	Chr03	8816843	8817073
Jr01_18920_p1	Chr01	17570891	17571143	Jr03_11260_p1	Chr03	8805056	8805115
Jr01_18980_p1	Chr01	17706617	17707018	Jr03_11220_p1	Chr03	8758390	8758538
Jr01_18510_p1	Chr01	17078967	17079165	Jr04_13660_p1	Chr04	27260161	27260533
Jr01_18520_p1	Chr01	17107616	17107695	Jr04_13700_p1	Chr04	27298578	27298699
Jr01_18600_p1	Chr01	17261284	17261544	Jr04_13740_p1	Chr04	27372673	27372939
Jr01_18650_p1	Chr01	17274357	17274437	Jr04_13750_p1	Chr04	27380348	27380979
Jr01_18750_p1	Chr01	17355967	17356096	Jr04_13770_p1	Chr04	27404979	27405225
Jr01_18760_p1	Chr01	17367757	17367841	Jr04_13810_p1	Chr04	27425356	27425632
Jr01_18860_p1	Chr01	17508989	17509178	Jr04_13900_p1	Chr04	27510752	27510905
Jr01_18880_p1	Chr01	17544042	17544387	Jr04_13930_p1	Chr04	27534946	27535039
Jr01_18920_p1	Chr01	17570891	17571143	Jr04_13960_p1	Chr04	27552919	27553207
Jr01_20870_p1	Chr01	21358670	21358895	Jr04_17190_p1	Chr04	30463817	30464089
Jr01_20910_p1	Chr01	21377628	21377691	Jr04_17130_p1	Chr04	30419268	30419279
Jr01_20960_p2	Chr01	21435505	21435527	Jr04_17070_p1	Chr04	30385034	30385181
Jr01_21000_p1	Chr01	21628212	21628571	Jr04_17080_p1	Chr04	30384782	30384951
Jr01_21030_p1	Chr01	21696263	21696422	Jr04_17050_p1	Chr04	30373382	30373772
Jr01_21080_p1	Chr01	21873640	21873833	Jr04_17040_p1	Chr04	30358339	30358499
Jr01_21150_p1	Chr01	21993836	21994087	Jr04_17030_p1	Chr04	30353169	30353414
Jr01_21200_p1	Chr01	22161723	22162040	Jr04_16970_p1	Chr04	30296354	30296722
Jr01_21190_p1	Chr01	22162597	22162773	Jr04_16980_p1	Chr04	30295758	30296720
Jr01_21240_p1	Chr01	22289722	22289865	Jr04_16940_p1	Chr04	30270004	30270129
Jr01_21420_p1	Chr01	22620973	22621300	Jr04_16830_p1	Chr04	30180117	30180442
Jr01_21460_p1	Chr01	22682301	22682327	Jr04_16810_p1	Chr04	30165041	30165134
Jr01_21550_p1	Chr01	22949452	22949619	Jr04_16700_p1	Chr04	30078518	30078736
Jr01_21660_p1	Chr01	23172652	23173452	Jr04_16640_p1	Chr04	30032594	30032930
Jr01_21770_p1	Chr01	23365796	23366443	Jr04_16600_p1	Chr04	30013657	30014346
Jr01_21890_p1	Chr01	23733801	23734327	Jr04_16590_p1	Chr04	29997439	30000037
Jr01_21990_p1	Chr01	24214058	24214572	Jr04_16500_p1	Chr04	29876068	29876103
Jr01_22020_p1	Chr01	24249892	24250177	Jr04_16460_p1	Chr04	29864276	29864620
Jr01_22040_p1	Chr01	24338630	24338728	Jr04_16440_p1	Chr04	29845981	29846079
Jr01_19840_p1	Chr01	19239965	19241285	Jr04_07090_p1	Chr04	15352638	15352946
Jr01_19890_p1	Chr01	19304700	19306098	Jr04_07070_p1	Chr04	15294256	15294567
Jr01_19950_p1	Chr01	19369016	19369750	Jr04_06920_p1	Chr04	14650679	14651012
Jr01_19990_p1	Chr01	19544519	19545407	Jr04_06890_p1	Chr04	14586424	14586619
Jr01_20000_p1	Chr01	19578768	19579293	Jr04_06860_p1	Chr04	14443954	14444523
Jr01_20050_p1	Chr01	19677669	19677801	Jr04_06790_p1	Chr04	14029558	14030386
Jr01_20060_p1	Chr01	19683937	19684650	Jr04_06710_p1	Chr04	13816682	13817114
Jr01_25970_p1	Chr01	35660229	35662495	Jr06_03740_p1	Chr06	4405249	4407537
Jr01_26090_p1	Chr01	35790955	35791590	Jr06_03830_p1	Chr06	4527489	4528379
Jr01_26120_p1	Chr01	35872721	35872896	Jr06_03840_p1	Chr06	4543110	4543240
Jr01_26160_p1	Chr01	35897632	35899251	Jr06_03870_p1	Chr06	4569762	4569811
Jr01_26230_p1	Chr01	35935771	35935816	Jr06_03890_p1	Chr06	4599209	4599895
Jr01_26280_p1	Chr01	36037441	36037718	Jr06_03960_p1	Chr06	4669686	4670146
Jr01_26300_p1	Chr01	36051906	36052136	Jr06_03970_p1	Chr06	4671230	4671679
Jr01_26400_p1	Chr01	36139133	36139330	Jr06_04080_p1	Chr06	4721354	4721653
Jr01_26490_p1	Chr01	36361573	36361774	Jr06_04130_p1	Chr06	4775484	4775733
Jr01_15180_p1	Chr01	12916116	12916288	Jr06_01800_p1	Chr06	1874171	1874373
Jr01_15240_p1	Chr01	13041151	13041540	Jr06_01690_p1	Chr06	1786963	1787349
Jr01_15270_p1	Chr01	13120416	13120538	Jr06_01600_p1	Chr06	1728344	1728477
Jr01_15300_p1	Chr01	13139147	13139257	Jr06_01540_p1	Chr06	1708212	1708312
Jr01_15310_p1	Chr01	13169524	13169622	Jr06_01530_p1	Chr06	1698562	1698789
Jr01_15460_p1	Chr01	13285547	13285966	Jr06_01450_p1	Chr06	1593235	1593657
Jr01_15500_p1	Chr01	13295777	13295815	Jr06_01410_p1	Chr06	1577459	1577760
Jr01_15530_p1	Chr01	13322038	13322079	Jr06_01400_p1	Chr06	1571444	1571635
Jr01_14070_p1	Chr01	11439323	11439474	Jr06_02770_p1	Chr06	2823998	2824223
Jr01_14090_p1	Chr01	11529636	11529729	Jr06_02740_p1	Chr06	2764237	2764545
Jr01_14110_p1	Chr01	11538994	11541108	Jr06_02710_p1	Chr06	2747112	2749052
Jr01_14210_p1	Chr01	11584850	11585080	Jr06_02700_p1	Chr06	2737246	2737533
Jr01_14260_p1	Chr01	11640083	11640228	Jr06_02630_p1	Chr06	2687399	2687668
Jr01_14280_p1	Chr01	11647068	11647102	Jr06_02610_p1	Chr06	2652660	2653658
Jr01_28300_p1	Chr01	38950227	38950387	Jr07_29860_p1	Chr07	45277583	45277931
Jr01_28360_p1	Chr01	39010624	39010866	Jr07_29910_p1	Chr07	45306269	45306526
Jr01_28440_p1	Chr01	39054964	39055140	Jr07_29980_p1	Chr07	45360349	45360526
Jr01_28450_p1	Chr01	39063983	39064162	Jr07_29990_p1	Chr07	45366685	45367237
Jr01_28530_p1	Chr01	39192602	39192727	Jr07_30050_p1	Chr07	45409482	45409646
Jr01_28560_p1	Chr01	39210334	39211507	Jr07_30080_p1	Chr07	45443144	45444317
Jr01_28580_p1	Chr01	39234712	39236145	Jr07_30120_p1	Chr07	45459340	45459619
Jr01_28590_p1	Chr01	39243559	39243745	Jr07_30170_p1	Chr07	45477587	45477625
Jr01_28720_p1	Chr01	39450080	39450244	Jr07_30200_p1	Chr07	45510121	45510264
Jr01_26280_p1	Chr01	36037441	36037718	Jr07_27970_p1	Chr07	43712247	43712461
Jr01_26330_p1	Chr01	36078910	36079039	Jr07_28050_p1	Chr07	43761213	43761324
Jr01_26340_p1	Chr01	36087402	36087820	Jr07_28060_p1	Chr07	43773717	43774181
Jr01_26430_p1	Chr01	36189128	36189447	Jr07_28100_p1	Chr07	43811540	43811810
Jr01_26450_p1	Chr01	36229760	36229894	Jr07_28130_p1	Chr07	43831542	43831838
Jr01_26540_p1	Chr01	36446078	36446198	Jr07_28210_p1	Chr07	43886065	43886853
Jr01_26570_p1	Chr01	36503434	36503659	Jr07_28270_p1	Chr07	43916768	43917461
Jr01_26650_p1	Chr01	36674090	36674198	Jr07_28380_p1	Chr07	44020741	44020908
Jr01_26710_p1	Chr01	36789595	36789938	Jr07_28400_p1	Chr07	44057840	44058144
Jr01_29890_p1	Chr01	40740193	40740626	Jr07_31110_p1	Chr07	46301775	46301977
Jr01_29900_p1	Chr01	40745590	40745834	Jr07_31130_p1	Chr07	46305916	46306142
Jr01_29920_p1	Chr01	40764558	40764611	Jr07_31160_p1	Chr07	46321177	46321435
Jr01_30030_p1	Chr01	40878724	40879041	Jr07_31240_p1	Chr07	46369059	46369338
Jr01_30070_p1	Chr01	40896938	40897021	Jr07_31250_p1	Chr07	46372900	46373067
Jr01_30080_p1	Chr01	40902617	40902842	Jr07_31260_p1	Chr07	46377154	46377322
Jr01_30100_p1	Chr01	40929869	40929990	Jr07_31310_p1	Chr07	46433762	46434204
Jr01_30140_p1	Chr01	40969794	40970030	Jr07_31370_p1	Chr07	46470387	46470503
Jr01_25780_p1	Chr01	35270277	35270469	Jr07_27590_p1	Chr07	43346260	43346392
Jr01_25810_p1	Chr01	35397712	35398056	Jr07_27640_p1	Chr07	43403591	43403935
Jr01_25880_p1	Chr01	35551031	35551561	Jr07_27750_p1	Chr07	43472818	43473202
Jr01_25890_p1	Chr01	35555107	35555143	Jr07_27760_p1	Chr07	43475915	43476051
Jr01_25900_p1	Chr01	35570320	35571414	Jr07_27770_p1	Chr07	43489121	43489475
Jr01_25930_p1	Chr01	35623794	35624141	Jr07_27840_p1	Chr07	43565209	43565589
Jr01_25950_p1	Chr01	35656875	35657144	Jr07_27860_p1	Chr07	43572882	43573154
Jr01_26040_p1	Chr01	35742185	35742194	Jr07_27900_p1	Chr07	43665045	43665136
Jr01_32670_p1	Chr01	43547119	43547220	Jr07_22550_p1	Chr07	38687083	38687519
Jr01_32680_p1	Chr01	43552469	43552842	Jr07_22540_p1	Chr07	38669860	38669943
Jr01_32720_p1	Chr01	43589307	43589599	Jr07_22490_p1	Chr07	38639830	38640146
Jr01_32780_p1	Chr01	43634994	43635091	Jr07_22400_p1	Chr07	38567732	38567964
Jr01_32870_p1	Chr01	43677446	43677543	Jr07_22350_p1	Chr07	38545883	38545921
Jr01_32880_p1	Chr01	43680241	43680367	Jr07_22340_p1	Chr07	38531275	38531377
Jr01_32960_p1	Chr01	43704729	43704778	Jr07_22310_p1	Chr07	38500278	38500342
Jr01_31980_p1	Chr01	42982365	42983990	Jr07_23280_p1	Chr07	39466619	39466761
Jr01_32000_p1	Chr01	42992687	42993016	Jr07_23240_p1	Chr07	39423036	39423340
Jr01_32010_p1	Chr01	43006422	43006527	Jr07_23230_p1	Chr07	39415796	39415808
Jr01_32020_p1	Chr01	43018186	43018744	Jr07_23220_p1	Chr07	39403687	39403819
Jr01_32040_p1	Chr01	43033381	43033629	Jr07_23170_p1	Chr07	39316012	39316401
Jr01_32150_p1	Chr01	43126916	43127010	Jr07_23120_p1	Chr07	39256064	39256165
Jr01_27670_p1	Chr01	37903774	37906396	Jr08_03810_p1	Chr08	2830975	2831414
Jr01_27780_p1	Chr01	38037145	38037225	Jr08_03800_p1	Chr08	2824005	2824058
Jr01_27800_p1	Chr01	38083147	38083295	Jr08_03690_p1	Chr08	2795846	2795974
Jr01_27940_p1	Chr01	38284157	38284318	Jr08_03600_p1	Chr08	2718156	2718781
Jr01_27950_p1	Chr01	38348613	38349386	Jr08_03550_p1	Chr08	2630730	2630934
Jr01_27960_p1	Chr01	38398507	38399325	Jr08_03500_p1	Chr08	2590603	2590769
Jr01_28050_p1	Chr01	38498746	38499096	Jr08_03470_p1	Chr08	2584154	2584295
Jr01_06120_p1	Chr01	4196698	4196878	Jr09_04500_p1	Chr09	13738454	13739770
Jr01_06230_p1	Chr01	4252617	4252709	Jr09_04580_p1	Chr09	13807905	13807991
Jr01_06270_p1	Chr01	4283038	4283514	Jr09_04660_p1	Chr09	13914027	13915415
Jr01_06280_p1	Chr01	4293095	4293319	Jr09_04760_p1	Chr09	14098191	14098424
Jr01_06300_p1	Chr01	4305332	4305682	Jr09_04740_p1	Chr09	14100828	14101214
Jr01_06350_p1	Chr01	4337241	4337666	Jr09_04860_p2	Chr09	14295630	14295860
Jr01_06430_p1	Chr01	4387799	4388037	Jr09_04880_p1	Chr09	14327204	14327353
Jr01_06520_p1	Chr01	4447245	4447317	Jr09_04920_p1	Chr09	14378329	14378588
Jr01_06540_p1	Chr01	4454505	4455998	Jr09_04930_p1	Chr09	14396182	14396259
Jr01_11000_p1	Chr01	8239575	8239628	Jr09_12590_p1	Chr09	21102728	21102825
Jr01_11030_p1	Chr01	8255465	8255758	Jr09_12580_p1	Chr09	21091099	21091335
Jr01_11040_p1	Chr01	8267249	8267348	Jr09_12570_p1	Chr09	21083806	21083950
Jr01_11050_p1	Chr01	8275763	8275922	Jr09_12510_p1	Chr09	21055082	21055810
Jr01_11070_p1	Chr01	8300345	8300402	Jr09_12460_p1	Chr09	21020427	21020662
Jr01_11170_p1	Chr01	8339045	8339582	Jr09_12430_p1	Chr09	20992883	20993145
Jr01_11240_p1	Chr01	8402241	8402731	Jr09_12340_p1	Chr09	20954656	20954745
Jr01_11260_p1	Chr01	8426033	8428369	Jr09_12220_p1	Chr09	20889485	20891836
Jr01_11350_p1	Chr01	8518230	8518508	Jr09_12160_p1	Chr09	20852734	20852922
Jr01_11400_p1	Chr01	8531107	8531152	Jr09_12070_p1	Chr09	20738595	20738748
Jr01_11720_p1	Chr01	8880449	8880630	Jr09_11840_p1	Chr09	20611497	20611616
Jr01_11750_p1	Chr01	8908276	8910198	Jr09_11760_p1	Chr09	20559545	20561494
Jr01_11760_p1	Chr01	8922656	8922734	Jr09_11750_p1	Chr09	20537784	20537934
Jr01_11820_p1	Chr01	8973384	8973516	Jr09_11670_p1	Chr09	20462383	20463108
Jr01_11900_p1	Chr01	9039643	9041310	Jr09_11650_p1	Chr09	20448130	20449758
Jr01_11910_p1	Chr01	9069966	9070194	Jr09_11640_p1	Chr09	20430028	20430282
Jr01_11990_p1	Chr01	9114738	9115061	Jr09_11590_p1	Chr09	20402010	20402051
Jr01_12040_p1	Chr01	9163168	9163415	Jr09_11540_p1	Chr09	20372622	20373161
Jr01_12060_p1	Chr01	9170058	9170179	Jr09_11530_p1	Chr09	20367970	20368213
Jr01_03520_p1	Chr01	2696420	2696486	Jr10_02680_p1	Chr10	1688884	1688950
Jr01_03530_p1	Chr01	2700793	2701663	Jr10_02690_p1	Chr10	1693565	1693662
Jr01_03540_p1	Chr01	2708410	2708572	Jr10_02710_p1	Chr10	1703418	1703479
Jr01_03630_p1	Chr01	2736903	2736940	Jr10_02730_p1	Chr10	1718202	1720037
Jr01_03640_p1	Chr01	2748503	2748880	Jr10_02740_p1	Chr10	1729914	1729946
Jr01_03660_p1	Chr01	2778444	2778721	Jr10_02770_p1	Chr10	1758218	1759606
Jr01_03670_p1	Chr01	2790326	2790460	Jr10_02790_p1	Chr10	1774664	1774798
Jr01_03700_p1	Chr01	2798657	2798824	Jr10_02810_p1	Chr10	1784489	1784593
Jr01_03760_p1	Chr01	2837015	2837129	Jr10_02830_p1	Chr10	1806953	1807948
Jr01_03770_p1	Chr01	2843399	2844886	Jr10_02890_p1	Chr10	1833031	1833127
Jr01_03840_p1	Chr01	2889800	2889996	Jr10_02920_p1	Chr10	1852826	1853797
Jr01_03900_p1	Chr01	2923027	2923080	Jr10_02930_p1	Chr10	1860875	1860931
Jr01_03940_p1	Chr01	2940137	2940775	Jr10_02940_p1	Chr10	1866105	1866500
Jr01_03980_p1	Chr01	2959339	2959437	Jr10_02980_p1	Chr10	1914163	1914551
Jr01_03990_p1	Chr01	2962749	2962794	Jr10_02990_p1	Chr10	1918082	1918205
Jr01_04020_p1	Chr01	2976917	2978011	Jr10_03040_p1	Chr10	1942367	1943515
Jr01_04040_p1	Chr01	2990887	2990968	Jr10_03050_p1	Chr10	1961792	1961873
Jr01_04050_p1	Chr01	3001625	3001663	Jr10_03060_p1	Chr10	1969288	1969326
Jr01_04100_p1	Chr01	3055259	3055525	Jr10_03070_p1	Chr10	1981379	1981557
Jr01_04110_p1	Chr01	3077034	3077336	Jr10_03080_p1	Chr10	2009129	2009431
Jr01_04130_p1	Chr01	3082564	3082651	Jr10_03090_p1	Chr10	2014841	2014928
Jr01_04140_p1	Chr01	3095325	3095417	Jr10_03100_p1	Chr10	2029032	2029335
Jr01_04160_p1	Chr01	3112151	3112282	Jr10_03120_p1	Chr10	2035497	2035758
Jr01_04210_p1	Chr01	3129690	3129993	Jr10_03130_p1	Chr10	2044386	2044760
Jr01_04240_p1	Chr01	3142558	3142828	Jr10_03150_p1	Chr10	2048470	2048699
Jr01_04290_p1	Chr01	3173462	3173499	Jr10_03160_p1	Chr10	2053059	2053093
Jr01_04300_p1	Chr01	3192879	3193092	Jr10_03170_p1	Chr10	2065463	2065676
Jr01_04330_p1	Chr01	3203027	3203111	Jr10_03190_p1	Chr10	2071476	2071560
Jr01_04360_p1	Chr01	3222586	3222791	Jr10_03200_p1	Chr10	2079675	2079935
Jr01_04390_p1	Chr01	3228877	3228961	Jr10_03210_p1	Chr10	2085854	2086045
Jr01_04450_p1	Chr01	3245003	3245881	Jr10_03240_p1	Chr10	2090993	2091865
Jr01_04470_p1	Chr01	3272368	3272379	Jr10_03280_p1	Chr10	2120687	2120755
Jr01_04500_p1	Chr01	3287552	3287713	Jr10_03290_p1	Chr10	2125365	2125539
Jr01_04520_p1	Chr01	3300626	3300771	Jr10_03310_p1	Chr10	2132799	2132907
Jr01_04530_p1	Chr01	3311784	3312410	Jr10_03330_p1	Chr10	2141482	2141590
Jr01_04680_p1	Chr01	3379486	3379920	Jr10_03350_p1	Chr10	2151750	2152184
Jr01_04710_p1	Chr01	3396600	3396972	Jr10_03380_p1	Chr10	2157541	2157668
Jr01_04720_p1	Chr01	3403366	3403953	Jr10_03390_p1	Chr10	2174201	2174821
Jr01_04730_p1	Chr01	3407062	3407274	Jr10_03410_p1	Chr10	2200885	2200986
Jr01_04740_p1	Chr01	3412801	3412966	Jr10_03420_p1	Chr10	2203387	2203782
Jr01_04750_p1	Chr01	3420390	3420475	Jr10_03430_p1	Chr10	2208298	2208351
Jr01_04760_p1	Chr01	3423388	3423571	Jr10_03440_p1	Chr10	2213892	2213986
Jr01_04820_p1	Chr01	3486236	3486334	Jr10_03470_p1	Chr10	2256118	2256217
Jr01_04850_p1	Chr01	3508906	3509469	Jr10_03510_p1	Chr10	2279795	2280367
Jr01_04860_p1	Chr01	3515515	3515828	Jr10_03520_p1	Chr10	2285151	2285395
Jr01_04870_p1	Chr01	3526267	3526713	Jr10_03530_p1	Chr10	2298786	2299229
Jr01_04950_p1	Chr01	3591320	3591561	Jr10_03540_p1	Chr10	2306390	2306905
Jr01_04990_p1	Chr01	3622575	3622885	Jr10_03550_p1	Chr10	2320326	2320663
Jr01_05030_p1	Chr01	3677896	3678113	Jr10_03560_p1	Chr10	2330658	2332085
Jr01_05110_p1	Chr01	3732436	3732942	Jr10_03590_p1	Chr10	2348365	2348595
Jr01_05140_p1	Chr01	3742628	3742835	Jr10_03630_p1	Chr10	2354203	2355246
Jr01_05160_p1	Chr01	3745988	3746147	Jr10_03640_p1	Chr10	2363169	2363471
Jr01_05180_p1	Chr01	3752754	3754349	Jr10_03650_p1	Chr10	2365203	2366747
Jr01_05290_p1	Chr01	3809047	3809103	Jr10_03680_p1	Chr10	2403741	2404360
Jr01_05300_p1	Chr01	3816525	3816587	Jr10_03710_p1	Chr10	2417953	2418120
Jr01_05330_p1	Chr01	3842843	3843129	Jr10_03750_p1	Chr10	2432366	2432542
Jr01_05340_p1	Chr01	3844777	3845178	Jr10_03760_p1	Chr10	2435469	2435876
Jr01_05450_p1	Chr01	3877347	3877504	Jr10_03800_p1	Chr10	2449392	2449473
Jr01_05540_p1	Chr01	3897507	3897902	Jr10_03810_p1	Chr10	2452674	2452809
Jr01_05620_p1	Chr01	3918479	3918619	Jr10_03820_p1	Chr10	2456232	2456361
Jr01_05640_p1	Chr01	3933412	3933658	Jr10_03860_p1	Chr10	2469200	2469471
Jr01_05660_p1	Chr01	3939290	3939907	Jr10_03900_p1	Chr10	2491005	2491658
Jr01_05680_p1	Chr01	3956609	3956813	Jr10_03930_p1	Chr10	2537122	2537292
Jr01_05690_p1	Chr01	3959277	3959378	Jr10_03950_p1	Chr10	2540174	2540357
Jr01_05730_p2	Chr01	3969137	3969610	Jr10_03960_p2	Chr10	2551158	2551481
Jr01_05750_p1	Chr01	3982738	3983061	Jr10_03970_p1	Chr10	2557441	2557614
Jr01_05760_p1	Chr01	3988936	3989197	Jr10_03980_p1	Chr10	2562229	2562505
Jr01_05780_p1	Chr01	4001196	4001451	Jr10_03990_p1	Chr10	2572184	2572439
Jr01_05810_p1	Chr01	4012705	4012753	Jr10_04010_p1	Chr10	2581721	2582260
Jr01_05860_p1	Chr01	4034130	4034198	Jr10_04030_p1	Chr10	2590475	2590543
Jr01_05910_p1	Chr01	4046676	4046808	Jr10_04060_p1	Chr10	2598293	2598425
Jr01_05950_p1	Chr01	4087513	4088021	Jr10_04080_p1	Chr10	2614847	2615007
Jr01_05960_p1	Chr01	4098201	4098411	Jr10_04090_p1	Chr10	2621943	2623157
Jr01_05970_p1	Chr01	4111123	4111338	Jr10_04100_p1	Chr10	2633121	2633308
Jr01_05990_p1	Chr01	4116423	4116631	Jr10_04110_p1	Chr10	2640978	2641186
Jr01_06020_p1	Chr01	4130399	4130717	Jr10_04120_p1	Chr10	2658936	2659251
Jr01_06030_p1	Chr01	4141275	4141847	Jr10_04150_p1	Chr10	2662847	2663401
Jr01_06040_p1	Chr01	4147984	4148915	Jr10_04160_p2	Chr10	2667114	2667966
Jr01_06050_p1	Chr01	4152780	4153649	Jr10_04180_p1	Chr10	2674282	2675253
Jr01_06090_p1	Chr01	4168333	4169664	Jr10_04200_p1	Chr10	2679739	2681064
Jr01_06100_p1	Chr01	4188244	4188760	Jr10_04230_p1	Chr10	2706046	2706458
Jr01_06110_p1	Chr01	4189991	4190198	Jr10_04250_p1	Chr10	2711960	2712145
Jr01_06120_p1	Chr01	4196698	4196878	Jr10_04260_p1	Chr10	2719121	2719325
Jr01_06140_p1	Chr01	4202793	4203671	Jr10_04300_p1	Chr10	2733771	2734667
Jr01_06150_p1	Chr01	4213988	4214160	Jr10_04310_p1	Chr10	2743885	2744006
Jr01_06190_p1	Chr01	4242565	4242687	Jr10_04330_p1	Chr10	2754547	2755089
Jr01_06220_p1	Chr01	4250914	4250999	Jr10_04360_p1	Chr10	2763914	2763955
Jr01_06260_p1	Chr01	4272019	4272321	Jr10_04420_p1	Chr10	2775284	2776819
Jr01_06280_p1	Chr01	4293095	4293319	Jr10_04440_p1	Chr10	2805136	2805363
Jr01_06350_p1	Chr01	4337241	4337666	Jr10_04460_p1	Chr10	2808514	2808918
Jr01_06360_p1	Chr01	4338291	4340327	Jr10_04470_p1	Chr10	2809810	2811951
Jr01_06380_p1	Chr01	4360471	4360753	Jr10_04490_p1	Chr10	2826941	2827441
Jr01_06410_p1	Chr01	4378752	4379074	Jr10_04510_p1	Chr10	2832091	2832285
Jr01_06450_p1	Chr01	4397868	4398481	Jr10_04530_p1	Chr10	2851861	2852054
Jr01_06490_p1	Chr01	4426906	4427071	Jr10_04590_p1	Chr10	2979624	2980112
Jr01_06520_p1	Chr01	4447245	4447317	Jr10_04600_p1	Chr10	2983503	2983752
Jr01_06540_p1	Chr01	4454505	4455998	Jr10_04610_p1	Chr10	2984189	2985706
Jr01_06590_p1	Chr01	4482692	4482824	Jr10_04630_p1	Chr10	2997714	2997905
Jr01_06610_p1	Chr01	4489011	4489283	Jr10_04650_p1	Chr10	3006030	3006388
Jr01_06660_p1	Chr01	4507945	4508089	Jr10_04660_p1	Chr10	3010861	3010988
Jr01_06730_p1	Chr01	4539374	4539904	Jr10_04690_p1	Chr10	3021722	3022063
Jr01_06770_p1	Chr01	4575744	4575946	Jr10_04720_p1	Chr10	3066717	3066901
Jr01_06790_p1	Chr01	4611084	4611461	Jr10_04740_p1	Chr10	3068378	3068779
Jr01_06800_p1	Chr01	4629867	4630291	Jr10_04750_p1	Chr10	3080989	3081395
Jr01_06810_p1	Chr01	4635310	4635698	Jr10_04770_p1	Chr10	3086865	3087250
Jr01_06860_p1	Chr01	4670008	4670168	Jr10_04820_p1	Chr10	3126705	3127636
Jr01_06870_p1	Chr01	4678638	4679044	Jr10_04830_p1	Chr10	3134523	3134632
Jr01_06890_p1	Chr01	4693291	4693299	Jr10_04840_p1	Chr10	3160954	3161301
Jr01_06930_p1	Chr01	4711528	4711588	Jr10_04860_p1	Chr10	3166172	3166284
Jr01_06960_p1	Chr01	4743097	4743231	Jr10_04890_p1	Chr10	3186342	3186472
Jr01_07000_p1	Chr01	4754883	4754989	Jr10_04900_p1	Chr10	3189261	3189346
Jr01_07020_p1	Chr01	4771786	4772886	Jr10_04910_p1	Chr10	3196310	3197359
Jr01_07030_p1	Chr01	4792552	4793470	Jr10_04930_p1	Chr10	3217017	3217125
Jr01_07040_p1	Chr01	4802467	4802624	Jr10_04940_p1	Chr10	3225237	3225519
Jr01_07080_p1	Chr01	4825811	4826011	Jr10_04950_p1	Chr10	3245374	3245562
Jr01_07220_p1	Chr01	4878387	4878578	Jr10_04970_p1	Chr10	3254721	3254832
Jr01_07240_p1	Chr01	4890592	4890818	Jr10_04980_p1	Chr10	3269775	3269908
Jr01_07250_p1	Chr01	4901359	4902411	Jr10_04990_p1	Chr10	3279473	3280525
Jr01_07260_p1	Chr01	4919044	4919255	Jr10_05090_p1	Chr10	3388721	3388909
Jr01_07270_p1	Chr01	4945741	4946163	Jr10_05140_p1	Chr10	3401968	3402390
Jr01_07290_p1	Chr01	4965077	4965706	Jr10_05160_p1	Chr10	3409279	3409908
Jr01_07300_p1	Chr01	4972881	4973073	Jr10_05190_p1	Chr10	3413057	3413602
Jr01_07340_p1	Chr01	5004615	5004672	Jr10_05200_p1	Chr10	3431937	3432039
Jr01_07360_p1	Chr01	5027016	5027173	Jr10_05220_p1	Chr10	3441110	3441346
Jr01_07390_p1	Chr01	5043484	5043753	Jr10_05260_p1	Chr10	3456470	3456716
Jr01_07480_p1	Chr01	5105577	5106694	Jr10_05310_p1	Chr10	3496467	3497590
Jr01_07490_p1	Chr01	5136640	5137376	Jr10_05340_p1	Chr10	3512957	3513693
Jr01_07500_p1	Chr01	5138139	5138804	Jr10_05350_p1	Chr10	3515155	3515286
Jr01_07510_p1	Chr01	5142748	5143049	Jr10_05380_p1	Chr10	3520985	3521662
Jr01_07520_p1	Chr01	5160777	5161118	Jr10_05390_p1	Chr10	3534133	3534497
Jr01_07540_p1	Chr01	5171040	5171123	Jr10_05410_p1	Chr10	3545146	3545441
Jr01_07580_p1	Chr01	5201853	5202272	Jr10_05430_p1	Chr10	3559795	3560105
Jr01_07610_p1	Chr01	5251285	5251869	Jr10_05440_p1	Chr10	3565208	3565708
Jr01_07650_p1	Chr01	5256007	5256739	Jr10_05450_p1	Chr10	3574968	3574994
Jr01_07700_p1	Chr01	5274918	5274922	Jr10_05480_p1	Chr10	3591901	3592160
Jr01_07730_p1	Chr01	5288646	5288788	Jr10_05490_p1	Chr10	3595034	3595209
Jr01_15900_p1	Chr01	13877048	13877785	Jr10_11320_p1	Chr10	8948713	8948799
Jr01_15910_p1	Chr01	13895524	13895651	Jr10_11330_p1	Chr10	8954167	8954409
Jr01_15960_p1	Chr01	13916551	13916771	Jr10_11340_p1	Chr10	8966922	8967635
Jr01_15970_p1	Chr01	13924085	13924615	Jr10_11350_p1	Chr10	8972185	8972715
Jr01_15990_p1	Chr01	13934651	13934811	Jr10_11370_p1	Chr10	8981469	8981627
Jr01_16050_p1	Chr01	14021747	14022046	Jr10_11380_p1	Chr10	9032311	9032610
Jr01_16060_p1	Chr01	14038117	14038233	Jr10_11390_p1	Chr10	9046522	9046638
Jr01_16080_p1	Chr01	14069158	14070048	Jr10_11400_p1	Chr10	9082997	9083884
Jr01_16140_p1	Chr01	14151464	14151642	Jr10_11430_p1	Chr10	9157457	9158344
Jr01_16200_p1	Chr01	14221626	14221750	Jr10_11520_p1	Chr10	9201976	9202131
Jr01_16210_p1	Chr01	14240752	14240925	Jr10_11560_p1	Chr10	9216629	9217063
Jr01_16230_p1	Chr01	14268718	14268825	Jr10_11570_p1	Chr10	9229782	9230099
Jr01_16240_p1	Chr01	14277518	14278006	Jr10_11590_p1	Chr10	9239449	9239940
Jr01_16250_p1	Chr01	14294683	14294896	Jr10_11630_p1	Chr10	9257185	9257673
Jr01_16290_p1	Chr01	14306212	14307535	Jr10_11640_p1	Chr10	9269179	9270439
Jr01_16370_p1	Chr01	14369220	14369360	Jr10_11660_p1	Chr10	9297363	9297521
Jr01_16390_p1	Chr01	14396740	14397002	Jr10_11680_p1	Chr10	9305065	9305206
Jr01_16410_p1	Chr01	14404888	14405186	Jr10_11690_p1	Chr10	9320448	9320746
Jr01_16430_p1	Chr01	14442077	14442192	Jr10_11790_p1	Chr10	9390987	9391280
Jr01_16450_p1	Chr01	14467017	14467294	Jr10_11800_p1	Chr10	9403896	9404065
Jr01_16460_p1	Chr01	14469530	14469631	Jr10_11810_p1	Chr10	9405370	9405459
Jr01_16480_p1	Chr01	14510011	14510529	Jr10_11840_p1	Chr10	9429707	9430255
Jr01_16500_p1	Chr01	14538204	14538482	Jr10_11850_p1	Chr10	9441482	9441757
Jr01_16570_p1	Chr01	14736675	14737323	Jr10_11870_p1	Chr10	9467542	9468196
Jr01_16580_p1	Chr01	14751127	14751216	Jr10_11890_p1	Chr10	9487337	9487624
Jr01_16590_p1	Chr01	14776136	14777296	Jr10_11900_p1	Chr10	9504690	9505285
Jr01_16610_p1	Chr01	14815961	14816032	Jr10_11940_p1	Chr10	9630630	9630692
Jr01_16620_p1	Chr01	14848579	14848958	Jr10_11970_p1	Chr10	9705854	9706114
Jr01_16640_p1	Chr01	14866344	14866477	Jr10_11990_p1	Chr10	9722040	9722334
Jr01_16720_p1	Chr01	14914608	14915954	Jr10_12010_p1	Chr10	9792321	9793559
Jr01_16730_p1	Chr01	14976808	14976854	Jr10_12020_p1	Chr10	9827661	9827704
Jr01_16740_p1	Chr01	15007802	15007888	Jr10_12050_p1	Chr10	9868367	9868450
Jr01_16770_p1	Chr01	15026129	15026746	Jr10_12060_p1	Chr10	9872473	9873189
Jr01_16780_p1	Chr01	15032137	15032318	Jr10_12110_p1	Chr10	9917225	9917281
Jr01_16820_p1	Chr01	15110380	15110463	Jr10_12130_p1	Chr10	9924080	9924163
Jr01_16830_p1	Chr01	15122631	15122703	Jr10_12140_p1	Chr10	9934329	9934480
Jr01_16860_p1	Chr01	15143222	15143433	Jr10_12160_p1	Chr10	9956809	9956996
Jr01_16870_p1	Chr01	15150839	15151154	Jr10_12170_p1	Chr10	9962520	9962870
Jr01_16890_p1	Chr01	15156830	15156901	Jr10_12180_p1	Chr10	9969880	9969988
Jr01_16930_p1	Chr01	15179861	15180063	Jr10_12210_p1	Chr10	10031421	10031570
Jr01_16950_p1	Chr01	15210619	15210871	Jr10_12260_p1	Chr10	10147098	10147214
Jr01_16970_p1	Chr01	15246624	15247392	Jr10_12300_p1	Chr10	10217241	10217985
Jr01_16980_p1	Chr01	15284177	15284376	Jr10_12320_p1	Chr10	10233901	10234063
Jr01_17000_p1	Chr01	15309189	15309262	Jr10_12360_p1	Chr10	10352346	10352574
Jr01_17040_p1	Chr01	15381607	15381969	Jr10_12390_p1	Chr10	10404523	10405368
Jr01_17070_p1	Chr01	15394554	15394948	Jr10_12480_p1	Chr10	10541924	10542306
Jr01_17110_p1	Chr01	15422155	15422365	Jr10_12510_p1	Chr10	10552021	10552677
Jr01_17120_p1	Chr01	15436732	15437342	Jr10_12530_p1	Chr10	10568247	10568547
Jr01_17150_p1	Chr01	15482854	15483189	Jr10_12550_p1	Chr10	10607205	10607609
Jr01_17180_p1	Chr01	15516567	15516752	Jr10_12560_p1	Chr10	10643515	10643647
Jr01_17200_p1	Chr01	15532132	15532251	Jr10_12580_p1	Chr10	10669929	10670054
Jr01_17220_p1	Chr01	15564077	15564426	Jr10_12630_p1	Chr10	10679394	10681208
Jr01_17230_p1	Chr01	15569310	15569386	Jr10_12640_p1	Chr10	10685352	10685452
Jr01_17240_p1	Chr01	15581818	15582315	Jr10_12650_p1	Chr10	10697412	10697483
Jr01_17270_p1	Chr01	15693370	15693946	Jr10_12670_p1	Chr10	10761079	10761640
Jr01_17310_p1	Chr01	15739180	15740393	Jr10_12680_p1	Chr10	10797234	10798447
Jr01_17330_p1	Chr01	15747377	15747616	Jr10_12700_p1	Chr10	10815926	10816223
Jr01_17410_p1	Chr01	15789828	15790106	Jr10_12710_p1	Chr10	10832090	10832193
Jr01_17510_p1	Chr01	15895926	15896301	Jr10_12740_p1	Chr10	10871001	10871362
Jr01_17570_p1	Chr01	15966798	15967013	Jr10_12750_p1	Chr10	10887634	10887734
Jr01_17610_p1	Chr01	16049730	16051412	Jr10_12770_p1	Chr10	10946623	10948326
Jr01_17620_p1	Chr01	16063128	16063134	Jr10_12790_p1	Chr10	10963896	10963902
Jr01_17660_p1	Chr01	16085699	16085837	Jr10_12810_p1	Chr10	10984100	10984190
Jr01_17670_p1	Chr01	16116501	16116658	Jr10_12840_p1	Chr10	11018984	11019238
Jr01_17680_p1	Chr01	16134643	16134752	Jr10_12850_p1	Chr10	11026328	11026422
Jr01_17700_p1	Chr01	16175862	16175988	Jr10_12860_p1	Chr10	11037575	11037768
Jr01_17760_p1	Chr01	16269654	16269897	Jr10_12880_p1	Chr10	11063073	11063377
Jr01_17780_p1	Chr01	16280331	16280799	Jr10_12900_p1	Chr10	11080885	11081273
Jr01_17820_p1	Chr01	16307999	16308410	Jr10_12950_p1	Chr10	11200060	11200482
Jr01_17830_p1	Chr01	16316751	16316952	Jr10_12960_p1	Chr10	11216983	11217154
Jr01_17860_p1	Chr01	16330150	16330263	Jr10_12980_p1	Chr10	11224318	11224570
Jr01_17870_p1	Chr01	16337972	16338088	Jr10_13000_p1	Chr10	11255586	11255795
Jr01_17890_p1	Chr01	16347851	16347973	Jr10_13050_p1	Chr10	11285536	11285658
Jr01_17910_p1	Chr01	16395658	16395888	Jr10_13140_p1	Chr10	11356694	11356708
Jr01_17930_p1	Chr01	16411457	16414411	Jr10_13170_p1	Chr10	11369436	11372375
Jr01_17940_p1	Chr01	16453233	16453430	Jr10_13220_p1	Chr10	11449913	11450080
Jr01_17970_p1	Chr01	16465461	16465682	Jr10_13250_p1	Chr10	11475053	11475117
Jr01_17980_p1	Chr01	16480451	16480562	Jr10_13260_p1	Chr10	11480908	11482306
Jr01_18030_p1	Chr01	16510016	16510177	Jr10_13310_p1	Chr10	11558280	11560001
Jr01_18050_p1	Chr01	16553851	16554156	Jr10_13330_p1	Chr10	11592109	11592385
Jr01_18060_p1	Chr01	16565727	16566296	Jr10_13340_p1	Chr10	11604796	11604989
Jr01_18080_p1	Chr01	16580415	16580468	Jr10_13350_p1	Chr10	11614910	11614933
Jr01_18110_p1	Chr01	16590974	16591062	Jr10_13370_p1	Chr10	11627167	11627255
Jr01_18140_p1	Chr01	16638985	16639269	Jr10_13400_p1	Chr10	11651266	11651550
Jr01_18150_p1	Chr01	16666251	16666583	Jr10_13420_p1	Chr10	11681693	11681758
Jr01_18180_p1	Chr01	16687625	16687725	Jr10_13460_p1	Chr10	11733754	11733957
Jr01_18190_p1	Chr01	16705812	16706006	Jr10_13480_p1	Chr10	11749786	11750007
Jr01_18210_p1	Chr01	16735517	16735828	Jr10_13490_p1	Chr10	11753226	11753903
Jr01_18220_p1	Chr01	16759900	16759963	Jr10_13500_p1	Chr10	11788379	11788620
Jr01_18290_p1	Chr01	16825686	16826469	Jr10_13530_p1	Chr10	11842140	11842343
Jr01_18300_p1	Chr01	16830864	16830931	Jr10_13560_p1	Chr10	11858775	11858879
Jr01_18350_p1	Chr01	16874897	16875026	Jr10_13610_p1	Chr10	11942201	11942483
Jr01_18360_p1	Chr01	16891968	16892112	Jr10_13620_p1	Chr10	11945725	11945824
Jr01_18370_p1	Chr01	16917680	16917735	Jr10_13630_p1	Chr10	11971496	11971551
Jr01_18380_p1	Chr01	16938870	16938992	Jr10_13660_p1	Chr10	12003552	12003770
Jr01_18390_p1	Chr01	16956278	16956356	Jr10_13670_p1	Chr10	12011264	12011342
Jr01_18480_p1	Chr01	17049485	17050138	Jr10_13680_p1	Chr10	12059695	12060363
Jr01_18520_p1	Chr01	17107616	17107695	Jr10_13710_p1	Chr10	12082077	12082280
Jr01_18530_p1	Chr01	17125147	17125536	Jr10_13720_p1	Chr10	12109482	12109862
Jr01_18560_p1	Chr01	17205060	17205234	Jr10_13740_p1	Chr10	12183079	12183186
Jr01_18600_p1	Chr01	17261284	17261544	Jr10_13770_p1	Chr10	12262933	12263196
Jr01_18690_p1	Chr01	17298198	17298390	Jr10_13790_p1	Chr10	12300557	12300749
Jr01_18750_p1	Chr01	17355967	17356096	Jr10_13870_p1	Chr10	12479682	12480398
Jr01_18760_p1	Chr01	17367757	17367841	Jr10_13880_p1	Chr10	12491104	12491556
Jr01_18770_p1	Chr01	17375740	17377032	Jr10_13890_p1	Chr10	12495487	12496779
Jr01_18870_p1	Chr01	17534925	17535128	Jr10_13920_p1	Chr10	12557595	12558020
Jr01_18920_p1	Chr01	17570891	17571143	Jr10_13930_p1	Chr10	12623147	12623416
Jr01_18940_p1	Chr01	17651530	17652141	Jr10_13940_p1	Chr10	12647637	12647992
Jr01_19020_p1	Chr01	17773968	17774077	Jr10_14020_p1	Chr10	12750419	12750760
Jr01_19040_p1	Chr01	17856130	17856358	Jr10_14120_p1	Chr10	12784328	12784396
Jr01_19090_p1	Chr01	17908686	17909087	Jr10_14150_p1	Chr10	12905055	12905462
Jr01_19110_p1	Chr01	17917976	17918063	Jr10_14170_p1	Chr10	12936727	12937173
Jr01_19140_p1	Chr01	17942307	17942991	Jr10_14190_p1	Chr10	12956126	12956589
Jr01_19150_p1	Chr01	17992627	17992859	Jr10_14210_p1	Chr10	12988594	12988855
Jr01_19180_p1	Chr01	18038424	18038433	Jr10_14220_p1	Chr10	13040391	13040561
Jr01_19190_p1	Chr01	18050664	18051242	Jr10_14230_p1	Chr10	13064836	13065414
Jr01_19290_p1	Chr01	18191487	18191705	Jr10_14270_p1	Chr10	13119052	13119276
Jr01_19310_p1	Chr01	18226016	18226519	Jr10_14280_p1	Chr10	13139770	13140288
Jr01_19320_p1	Chr01	18250427	18250732	Jr10_14310_p1	Chr10	13170258	13170481
Jr01_19380_p1	Chr01	18305915	18306072	Jr10_14330_p1	Chr10	13198687	13198791
Jr01_19430_p1	Chr01	18342718	18342905	Jr10_14370_p1	Chr10	13242541	13242581
Jr01_19440_p1	Chr01	18369268	18369394	Jr10_14410_p1	Chr10	13267506	13267632
Jr01_19480_p1	Chr01	18412488	18412913	Jr10_14420_p1	Chr10	13320712	13321093
Jr01_19550_p1	Chr01	18459627	18461838	Jr10_14480_p1	Chr10	13474362	13476552
Jr01_19610_p1	Chr01	18710807	18711118	Jr10_14510_p1	Chr10	13512342	13513604
Jr01_19620_p1	Chr01	18776407	18776862	Jr10_14520_p1	Chr10	13534063	13534518
Jr01_19730_p1	Chr01	18987460	18987866	Jr10_14550_p1	Chr10	13565533	13565812
Jr01_19740_p1	Chr01	19004786	19004965	Jr10_14560_p1	Chr10	13576296	13576505
Jr01_19840_p1	Chr01	19239965	19241285	Jr10_14610_p1	Chr10	13869433	13869651
Jr01_19900_p1	Chr01	19318623	19318824	Jr10_14680_p1	Chr10	13912589	13912837
Jr01_19930_p1	Chr01	19329334	19329569	Jr10_14710_p1	Chr10	13935529	13935740
Jr01_19960_p1	Chr01	19399590	19402103	Jr10_14740_p1	Chr10	13944603	13947086
Jr01_19980_p1	Chr01	19495520	19495732	Jr10_14760_p1	Chr10	13982159	13982347
Jr01_19990_p1	Chr01	19544519	19545407	Jr10_14780_p1	Chr10	14019399	14019619
Jr01_20010_p1	Chr01	19594025	19594214	Jr10_14790_p1	Chr10	14062837	14063013
Jr01_28080_p1	Chr01	38522970	38523063	Jr10_20650_p1	Chr10	31233447	31233920
Jr01_28100_p1	Chr01	38545976	38546150	Jr10_20670_p1	Chr10	31280302	31280938
Jr01_28160_p1	Chr01	38573628	38573865	Jr10_20680_p1	Chr10	31290026	31290358
Jr01_28190_p1	Chr01	38648247	38648669	Jr10_20770_p1	Chr10	31359209	31359611
Jr01_28210_p1	Chr01	38669398	38669733	Jr10_20780_p1	Chr10	31411205	31411543
Jr01_28230_p1	Chr01	38751828	38752147	Jr10_20810_p1	Chr10	31460660	31460969
Jr01_28250_p1	Chr01	38839944	38840197	Jr10_20850_p1	Chr10	31494786	31494961
Jr01_28260_p1	Chr01	38876083	38876342	Jr10_20860_p1	Chr10	31503823	31504085
Jr01_28270_p1	Chr01	38893138	38893244	Jr10_20870_p1	Chr10	31521293	31521395
Jr01_28330_p1	Chr01	38987161	38987801	Jr10_20890_p1	Chr10	31571548	31572182
Jr01_28350_p1	Chr01	38999015	38999244	Jr10_20910_p1	Chr10	31581793	31582065
Jr01_28390_p1	Chr01	39014262	39014819	Jr10_20920_p1	Chr10	31605512	31606048
Jr01_28450_p1	Chr01	39063983	39064162	Jr10_20940_p1	Chr10	31631783	31631889
Jr01_28490_p1	Chr01	39086270	39086806	Jr10_20980_p1	Chr10	31723788	31724130
Jr01_28500_p1	Chr01	39098550	39099458	Jr10_21020_p1	Chr10	31768625	31768846
Jr01_28510_p1	Chr01	39125755	39126438	Jr10_21030_p1	Chr10	31802973	31803656
Jr01_28520_p1	Chr01	39175418	39175639	Jr10_21050_p1	Chr10	31854763	31854860
Jr01_28550_p1	Chr01	39207210	39207502	Jr10_21100_p1	Chr10	31913522	31913707
Jr01_28580_p1	Chr01	39234712	39236145	Jr10_21110_p1	Chr10	31938915	31940348
Jr01_28590_p1	Chr01	39243559	39243745	Jr10_21140_p1	Chr10	31957624	31957823
Jr01_28650_p1	Chr01	39361972	39362047	Jr10_21250_p1	Chr10	32211358	32211631
Jr01_28710_p1	Chr01	39446649	39446819	Jr10_21330_p1	Chr10	32333323	32333511
Jr01_28740_p1	Chr01	39491925	39491933	Jr10_21370_p1	Chr10	32419767	32419822
Jr01_28770_p1	Chr01	39503598	39503696	Jr10_21380_p1	Chr10	32431811	32431909
Jr01_28790_p1	Chr01	39515516	39515589	Jr10_21390_p1	Chr10	32444426	32444628
Jr01_28800_p1	Chr01	39542748	39542761	Jr10_21400_p1	Chr10	32466799	32467982
Jr01_28840_p1	Chr01	39566470	39566618	Jr10_21420_p1	Chr10	32489683	32490130
Jr01_28890_p1	Chr01	39625829	39626960	Jr10_21470_p1	Chr10	32530962	32531690
Jr01_28970_p1	Chr01	39703899	39704427	Jr10_21500_p1	Chr10	32588788	32589057
Jr01_29070_p1	Chr01	39842505	39842536	Jr10_21540_p1	Chr10	32645751	32645782
Jr01_29100_p1	Chr01	39875815	39876479	Jr10_21560_p1	Chr10	32684056	32684684
Jr01_29130_p1	Chr01	39926771	39927265	Jr10_21580_p1	Chr10	32702888	32703394
Jr01_29240_p1	Chr01	40036294	40037346	Jr10_21600_p1	Chr10	32800981	32802036
Jr01_29270_p1	Chr01	40054947	40055285	Jr10_21640_p1	Chr10	32859779	32859866
Jr01_29280_p1	Chr01	40058528	40058778	Jr10_21650_p1	Chr10	32867299	32867429
Jr01_29290_p1	Chr01	40072945	40073309	Jr10_21670_p1	Chr10	32922106	32922343
Jr01_29300_p1	Chr01	40075646	40075753	Jr10_21690_p1	Chr10	32926318	32926625
Jr01_29350_p1	Chr01	40104105	40104292	Jr10_21700_p1	Chr10	32933771	32933958
Jr01_29380_p1	Chr01	40169140	40169427	Jr10_21710_p1	Chr10	32973110	32973371
Jr01_29390_p1	Chr01	40187297	40187761	Jr10_21720_p1	Chr10	32987808	32988275
Jr01_29400_p1	Chr01	40199971	40200375	Jr10_21740_p1	Chr10	33004615	33005118
Jr01_29410_p1	Chr01	40211131	40211194	Jr10_21750_p1	Chr10	33019896	33020039
Jr01_29420_p1	Chr01	40219115	40220497	Jr10_21770_p1	Chr10	33035463	33036824
Jr01_29430_p1	Chr01	40230265	40230521	Jr10_21790_p1	Chr10	33044051	33044138
Jr01_29510_p2	Chr01	40321168	40323603	Jr10_21860_p1	Chr10	33071565	33071732
Jr01_29640_p1	Chr01	40475310	40476569	Jr10_21910_p1	Chr10	33141341	33141568
Jr01_29670_p1	Chr01	40504740	40504955	Jr10_21960_p1	Chr10	33173501	33173755
Jr01_29690_p1	Chr01	40514603	40514989	Jr10_22030_p1	Chr10	33228214	33228240
Jr01_29740_p1	Chr01	40559563	40559716	Jr10_22040_p2	Chr10	33235515	33235798
Jr01_29820_p1	Chr01	40666903	40667265	Jr10_22070_p1	Chr10	33258835	33259261
Jr01_29850_p1	Chr01	40689615	40689733	Jr10_22110_p1	Chr10	33295587	33295985
Jr01_29860_p1	Chr01	40706731	40706810	Jr10_22140_p1	Chr10	33330701	33330780
Jr01_29900_p1	Chr01	40745590	40745834	Jr10_22150_p1	Chr10	33371998	33372272
Jr01_29910_p1	Chr01	40757993	40758187	Jr10_22160_p1	Chr10	33381524	33381674
Jr01_29920_p1	Chr01	40764558	40764611	Jr10_22170_p1	Chr10	33386711	33386966
Jr01_29950_p1	Chr01	40804275	40806184	Jr10_22180_p1	Chr10	33399071	33399823
Jr01_29960_p1	Chr01	40810055	40810290	Jr10_22190_p1	Chr10	33407960	33408189
Jr01_29970_p1	Chr01	40822541	40822687	Jr10_22210_p1	Chr10	33416825	33416845
Jr01_30010_p1	Chr01	40859292	40859348	Jr10_22220_p1	Chr10	33445388	33445429
Jr01_30030_p1	Chr01	40878724	40879041	Jr10_22230_p1	Chr10	33476487	33476786
Jr01_30060_p1	Chr01	40885762	40886223	Jr10_22250_p1	Chr10	33478639	33479002
Jr01_30070_p1	Chr01	40896938	40897021	Jr10_22260_p1	Chr10	33495376	33495471
Jr01_30080_p1	Chr01	40902617	40902842	Jr10_22270_p1	Chr10	33507176	33507462
Jr01_30110_p1	Chr01	40947052	40947338	Jr10_22300_p1	Chr10	33553800	33554018
Jr01_30130_p1	Chr01	40964831	40964931	Jr10_22310_p1	Chr10	33559220	33559320
Jr01_30140_p1	Chr01	40969794	40970030	Jr10_22320_p1	Chr10	33562060	33562317
Jr01_30170_p1	Chr01	41030283	41030362	Jr10_22360_p1	Chr10	33595519	33595598
Jr01_30190_p1	Chr01	41042967	41043122	Jr10_22370_p1	Chr10	33606830	33607921
Jr01_30210_p1	Chr01	41067422	41067717	Jr10_22390_p1	Chr10	33624384	33624488
Jr01_30220_p1	Chr01	41081670	41082168	Jr10_22400_p1	Chr10	33649074	33649578
Jr01_30240_p1	Chr01	41111459	41111521	Jr10_22410_p1	Chr10	33661628	33661813
Jr01_30280_p1	Chr01	41164693	41165038	Jr10_22440_p1	Chr10	33697568	33697654
Jr01_30290_p1	Chr01	41167426	41167511	Jr10_22450_p1	Chr10	33706685	33707383
Jr01_30300_p1	Chr01	41230477	41230693	Jr10_22460_p1	Chr10	33762138	33764291
Jr01_30340_p1	Chr01	41275693	41277645	Jr10_22500_p1	Chr10	33787956	33789917
Jr01_30370_p1	Chr01	41322563	41323103	Jr10_22600_p1	Chr10	33928457	33928678
Jr01_30390_p1	Chr01	41342654	41342906	Jr10_22630_p1	Chr10	33939952	33940050
Jr01_30440_p1	Chr01	41386336	41386583	Jr10_22640_p1	Chr10	33946371	33946723
Jr01_30450_p1	Chr01	41397250	41397432	Jr10_22650_p1	Chr10	33961470	33961587
Jr01_30460_p1	Chr01	41417967	41418242	Jr10_22660_p1	Chr10	33984240	33984452
Jr01_30470_p1	Chr01	41423443	41423600	Jr10_22680_p1	Chr10	33990863	33991041
Jr01_30500_p1	Chr01	41469129	41469255	Jr10_22790_p1	Chr10	34098709	34098835
Jr01_30610_p1	Chr01	41510488	41510952	Jr10_22800_p1	Chr10	34117173	34117546
Jr01_30620_p1	Chr01	41523208	41523277	Jr10_22820_p1	Chr10	34133640	34133709
Jr01_30640_p1	Chr01	41540819	41541211	Jr10_22840_p1	Chr10	34143041	34143512
Jr01_30650_p1	Chr01	41552719	41553682	Jr10_22860_p1	Chr10	34146251	34147223
Jr01_30720_p1	Chr01	41620900	41620996	Jr10_22890_p1	Chr10	34166110	34166285
Jr01_09190_p1	Chr01	6569509	6569736	Jr10_06430_p1	Chr10	4262665	4262767
Jr01_09200_p1	Chr01	6577935	6577974	Jr10_06440_p1	Chr10	4268878	4269375
Jr01_09240_p1	Chr01	6652555	6652668	Jr10_06450_p1	Chr10	4276785	4276883
Jr01_09250_p1	Chr01	6664666	6664914	Jr10_06470_p1	Chr10	4293132	4293448
Jr01_09260_p1	Chr01	6668527	6668592	Jr10_06490_p1	Chr10	4297112	4297365
Jr01_09370_p1	Chr01	6737094	6737687	Jr10_06510_p1	Chr10	4314370	4314960
Jr01_09380_p1	Chr01	6759536	6759567	Jr10_06520_p1	Chr10	4328694	4329770
Jr01_09410_p1	Chr01	6783224	6783788	Jr10_06530_p1	Chr10	4335486	4336053
Jr01_09420_p1	Chr01	6810453	6810746	Jr10_06540_p1	Chr10	4344321	4344793
Jr01_09460_p1	Chr01	6865505	6866311	Jr10_06570_p1	Chr10	4360175	4360987
Jr01_09500_p1	Chr01	6903904	6904785	Jr10_06580_p2	Chr10	4387324	4387710
Jr01_09520_p1	Chr01	6919237	6919575	Jr10_06590_p1	Chr10	4395633	4395983
Jr01_09540_p1	Chr01	6938140	6938442	Jr10_06610_p1	Chr10	4407352	4407566
Jr01_09560_p1	Chr01	6957925	6958396	Jr10_06630_p1	Chr10	4418659	4419130
Jr01_09580_p1	Chr01	6965045	6965344	Jr10_06660_p1	Chr10	4423781	4423792
Jr01_09590_p1	Chr01	6970449	6970761	Jr10_06680_p1	Chr10	4429392	4429704
Jr01_09630_p1	Chr01	7017374	7017529	Jr10_06690_p1	Chr10	4436532	4436723
Jr01_09660_p1	Chr01	7043408	7043428	Jr10_06700_p1	Chr10	4455571	4455943
Jr01_09730_p1	Chr01	7075081	7075330	Jr10_06710_p1	Chr10	4467114	4467298
Jr01_09750_p1	Chr01	7094927	7095111	Jr10_06730_p1	Chr10	4502049	4502233
Jr01_09820_p1	Chr01	7139828	7139881	Jr10_06750_p1	Chr10	4520043	4520417
Jr01_09830_p1	Chr01	7150766	7150953	Jr10_06760_p1	Chr10	4526335	4526396
Jr01_09840_p1	Chr01	7169769	7169861	Jr10_06770_p1	Chr10	4548794	4548880
Jr01_09940_p1	Chr01	7255368	7258100	Jr10_06820_p1	Chr10	4595739	4598384
Jr01_10030_p1	Chr01	7448373	7448589	Jr10_06840_p1	Chr10	4609765	4609907
Jr01_10150_p1	Chr01	7571152	7571200	Jr10_06850_p1	Chr10	4624552	4624785
Jr01_10170_p1	Chr01	7610375	7610452	Jr10_06940_p1	Chr10	4775959	4776050
Jr01_10180_p1	Chr01	7628525	7628811	Jr10_06970_p1	Chr10	4848819	4849064
Jr01_10190_p1	Chr01	7634153	7634347	Jr10_07000_p1	Chr10	4863063	4863155
Jr01_10220_p1	Chr01	7647330	7647409	Jr10_07020_p1	Chr10	4866865	4867613
Jr01_10230_p1	Chr01	7653476	7653681	Jr10_07030_p1	Chr10	4873951	4874295
Jr01_10260_p1	Chr01	7703191	7703417	Jr10_07100_p1	Chr10	4953567	4953833
Jr01_10270_p1	Chr01	7713445	7713694	Jr10_07120_p1	Chr10	4974601	4975031
Jr01_10340_p1	Chr01	7734267	7734277	Jr10_07140_p1	Chr10	5001205	5001349
Jr01_10350_p1	Chr01	7739380	7741341	Jr10_07150_p1	Chr10	5007654	5009615
Jr01_10360_p1	Chr01	7751721	7751779	Jr10_07160_p1	Chr10	5026116	5026174
Jr01_10420_p1	Chr01	7776447	7776639	Jr10_07250_p1	Chr10	5069904	5070096
Jr01_10440_p1	Chr01	7822808	7823554	Jr10_07270_p1	Chr10	5100999	5101274
Jr01_10460_p1	Chr01	7856202	7856581	Jr10_07280_p1	Chr10	5111348	5111675
Jr01_10470_p1	Chr01	7857973	7858351	Jr10_07290_p1	Chr10	5113579	5113954
Jr01_10480_p1	Chr01	7872951	7873069	Jr10_07300_p1	Chr10	5121169	5121316
Jr01_10500_p1	Chr01	7875621	7875862	Jr10_07310_p1	Chr10	5123791	5124064
Jr01_10510_p1	Chr01	7884694	7885610	Jr10_07320_p1	Chr10	5127468	5128390
Jr01_10600_p1	Chr01	7937475	7938074	Jr10_07350_p1	Chr10	5152385	5153152
Jr01_10630_p1	Chr01	7952644	7952928	Jr10_07390_p1	Chr10	5169861	5170145
Jr01_10650_p1	Chr01	7966251	7966580	Jr10_07410_p1	Chr10	5181053	5181379
Jr01_10690_p1	Chr01	7972900	7972979	Jr10_07430_p1	Chr10	5185421	5185443
Jr01_10700_p1	Chr01	7979652	7979745	Jr10_07440_p1	Chr10	5187517	5189268
Jr01_10710_p1	Chr01	7986853	7987656	Jr10_07460_p1	Chr10	5206217	5206437
Jr01_10740_p1	Chr01	8017422	8018193	Jr10_07470_p1	Chr10	5222180	5222668
Jr01_10860_p1	Chr01	8086670	8086715	Jr10_07500_p1	Chr10	5241691	5241961
Jr01_10870_p1	Chr01	8111909	8112028	Jr10_07550_p1	Chr10	5287793	5287918
Jr01_10890_p1	Chr01	8119254	8119437	Jr10_07570_p1	Chr10	5310099	5310171
Jr01_10930_p1	Chr01	8138333	8138579	Jr10_07600_p1	Chr10	5322154	5322433
Jr01_10950_p1	Chr01	8167953	8168387	Jr10_07630_p1	Chr10	5329442	5329739
Jr01_10960_p1	Chr01	8187491	8187785	Jr10_07640_p1	Chr10	5342777	5342833
Jr01_10990_p1	Chr01	8228518	8228878	Jr10_07650_p1	Chr10	5348601	5349074
Jr01_11000_p1	Chr01	8239575	8239628	Jr10_07670_p1	Chr10	5359204	5359245
Jr01_11040_p1	Chr01	8267249	8267348	Jr10_07690_p1	Chr10	5365660	5365759
Jr01_11070_p1	Chr01	8300345	8300402	Jr10_07740_p1	Chr10	5401980	5402036
Jr01_11170_p1	Chr01	8339045	8339582	Jr10_07760_p1	Chr10	5429377	5429926
Jr01_11190_p1	Chr01	8366777	8367871	Jr10_07860_p1	Chr10	5471078	5472190
Jr01_11200_p1	Chr01	8381412	8381573	Jr10_07870_p1	Chr10	5487536	5487630
Jr01_11240_p1	Chr01	8402241	8402731	Jr10_07890_p1	Chr10	5498582	5499063
Jr01_11260_p1	Chr01	8426033	8428369	Jr10_07920_p1	Chr10	5516704	5519049
Jr01_11270_p1	Chr01	8436458	8436659	Jr10_07970_p1	Chr10	5543958	5544084
Jr01_11290_p1	Chr01	8445870	8447969	Jr10_07980_p1	Chr10	5547919	5549769
Jr01_11300_p1	Chr01	8451114	8452523	Jr10_08000_p1	Chr10	5571237	5572640
Jr01_11310_p1	Chr01	8462861	8463135	Jr10_08010_p1	Chr10	5604703	5605025
Jr01_11340_p1	Chr01	8511554	8512026	Jr10_08040_p1	Chr10	5627037	5627515
Jr01_11350_p1	Chr01	8518230	8518508	Jr10_08050_p1	Chr10	5636357	5636572
Jr01_11380_p1	Chr01	8523771	8524217	Jr10_08060_p1	Chr10	5647430	5647804
Jr01_11400_p1	Chr01	8531107	8531152	Jr10_08080_p1	Chr10	5661972	5662229
Jr01_11410_p1	Chr01	8540834	8540942	Jr10_08090_p1	Chr10	5669599	5669707
Jr01_11450_p1	Chr01	8566972	8566982	Jr10_08100_p1	Chr10	5686632	5686926
Jr01_11500_p1	Chr01	8617491	8617840	Jr10_08110_p1	Chr10	5701427	5701668
Jr01_11590_p1	Chr01	8720482	8721130	Jr10_08210_p1	Chr10	5745898	5746558
Jr01_11600_p1	Chr01	8761721	8763147	Jr10_08220_p1	Chr10	5755578	5757004
Jr01_01040_p1	Chr01	818494	819636	Jr10_00310_p1	Chr10	227507	228646
Jr01_01070_p1	Chr01	845537	846047	Jr10_00350_p1	Chr10	256907	257305
Jr01_01080_p1	Chr01	849223	849326	Jr10_00360_p1	Chr10	261715	261885
Jr01_01100_p1	Chr01	858011	858354	Jr10_00410_p1	Chr10	271685	271890
Jr01_01110_p1	Chr01	873233	873409	Jr10_00420_p1	Chr10	290530	290709
Jr01_01130_p1	Chr01	879394	879480	Jr10_00430_p1	Chr10	300194	300276
Jr01_01150_p1	Chr01	912309	912367	Jr10_00480_p1	Chr10	313421	313563
Jr01_01180_p1	Chr01	942769	943060	Jr10_00490_p1	Chr10	327278	327328
Jr01_01200_p1	Chr01	954361	954610	Jr10_00510_p1	Chr10	336209	336322
Jr01_01220_p1	Chr01	965047	965227	Jr10_00530_p1	Chr10	347461	347641
Jr01_01250_p1	Chr01	978695	978838	Jr10_00540_p1	Chr10	352735	353034
Jr01_01270_p1	Chr01	984836	985106	Jr10_00550_p1	Chr10	358874	359277
Jr01_01330_p1	Chr01	1012309	1012588	Jr10_00560_p1	Chr10	374789	375589
Jr01_01340_p1	Chr01	1019237	1019614	Jr10_00590_p1	Chr10	387546	387935
Jr01_01370_p1	Chr01	1044231	1045136	Jr10_00600_p1	Chr10	391115	392029
Jr01_01380_p1	Chr01	1061644	1062004	Jr10_00620_p1	Chr10	406368	406634
Jr01_01410_p1	Chr01	1102050	1102165	Jr10_00630_p1	Chr10	413365	413514
Jr01_01460_p1	Chr01	1130404	1130542	Jr10_00640_p1	Chr10	420098	420367
Jr01_01470_p1	Chr01	1132472	1132939	Jr10_00650_p1	Chr10	421722	422186
Jr01_01490_p1	Chr01	1164554	1164697	Jr10_00670_p1	Chr10	438706	438852
Jr01_01510_p1	Chr01	1204053	1204648	Jr10_00740_p1	Chr10	472935	473150
Jr01_01540_p1	Chr01	1215244	1215518	Jr10_00770_p1	Chr10	484530	484796
Jr01_01580_p1	Chr01	1233384	1233486	Jr10_00810_p1	Chr10	504711	505111
Jr01_01660_p1	Chr01	1319426	1319543	Jr10_00820_p1	Chr10	524310	524373
Jr01_01680_p1	Chr01	1323226	1323363	Jr10_00850_p1	Chr10	527433	527534
Jr01_01700_p1	Chr01	1336141	1336490	Jr10_00870_p1	Chr10	533915	534531
Jr01_01730_p1	Chr01	1373963	1374148	Jr10_00900_p1	Chr10	559525	559707
Jr01_01740_p1	Chr01	1374748	1375515	Jr10_00930_p1	Chr10	569318	570082
Jr01_01800_p1	Chr01	1407679	1408383	Jr10_00970_p1	Chr10	583857	584504
Jr01_01830_p1	Chr01	1428531	1428915	Jr10_00980_p1	Chr10	586815	586985
Jr01_01860_p1	Chr01	1442467	1442638	Jr10_01000_p1	Chr10	594593	594847
Jr01_01880_p1	Chr01	1477848	1478127	Jr10_01010_p1	Chr10	601859	602815
Jr01_01890_p1	Chr01	1482025	1482371	Jr10_01030_p1	Chr10	608282	608592
Jr01_01920_p1	Chr01	1495292	1495359	Jr10_01050_p1	Chr10	612304	613500
Jr01_02000_p1	Chr01	1565995	1566035	Jr10_01150_p1	Chr10	659168	659193
Jr01_02010_p1	Chr01	1581245	1581349	Jr10_01160_p1	Chr10	681884	681916
Jr01_02030_p1	Chr01	1593493	1594341	Jr10_01220_p1	Chr10	693604	693729
Jr01_02090_p1	Chr01	1631814	1631908	Jr10_01230_p1	Chr10	700964	702013
Jr01_02110_p1	Chr01	1662563	1662819	Jr10_01250_p1	Chr10	730783	731039
Jr01_02210_p1	Chr01	1740170	1740394	Jr10_01280_p1	Chr10	774371	774893
Jr01_02230_p1	Chr01	1743590	1744543	Jr10_01300_p1	Chr10	778842	779795
Jr01_02270_p1	Chr01	1779191	1779436	Jr10_01310_p1	Chr10	792676	792921
Jr01_02290_p1	Chr01	1785134	1785259	Jr10_01340_p1	Chr10	805205	805388
Jr01_02350_p1	Chr01	1833090	1833366	Jr10_01360_p1	Chr10	812042	813256
Jr01_02420_p1	Chr01	1864283	1864385	Jr10_01370_p1	Chr10	816199	816454
Jr01_02500_p1	Chr01	1874431	1874976	Jr10_01420_p1	Chr10	829373	829912
Jr01_02580_p1	Chr01	1917533	1918039	Jr10_01440_p1	Chr10	859527	860039
Jr01_02620_p1	Chr01	1928025	1928207	Jr10_01450_p1	Chr10	863657	863980
Jr01_02630_p1	Chr01	1934566	1934712	Jr10_01460_p1	Chr10	869698	869865
Jr01_02640_p1	Chr01	1939241	1939448	Jr10_01470_p1	Chr10	876343	876571
Jr01_02670_p1	Chr01	1946136	1946644	Jr10_01540_p1	Chr10	908924	909122
Jr01_02710_p1	Chr01	1956748	1956956	Jr10_01550_p1	Chr10	916078	916181
Jr01_02810_p1	Chr01	2003853	2004019	Jr10_01560_p1	Chr10	948304	948380
Jr01_02880_p1	Chr01	2046479	2046901	Jr10_01660_p1	Chr10	1003341	1003505
Jr01_02900_p1	Chr01	2068896	2069151	Jr10_01670_p1	Chr10	1008511	1008772
Jr01_02920_p1	Chr01	2086319	2086509	Jr10_01690_p1	Chr10	1013498	1013658
Jr01_02960_p1	Chr01	2109558	2110403	Jr10_01700_p1	Chr10	1019050	1019661
Jr01_02970_p1	Chr01	2121810	2122152	Jr10_01710_p1	Chr10	1028345	1028468
Jr01_03070_p1	Chr01	2190905	2191335	Jr10_01740_p1	Chr10	1050115	1050524
Jr01_03080_p1	Chr01	2197603	2198556	Jr10_01760_p1	Chr10	1059457	1059583
Jr01_03110_p1	Chr01	2240253	2240708	Jr10_01790_p1	Chr10	1072234	1072381
Jr01_03120_p1	Chr01	2243921	2244196	Jr10_01800_p1	Chr10	1081795	1082138
Jr01_03150_p1	Chr01	2257500	2257520	Jr10_01810_p1	Chr10	1104291	1104561
Jr01_03160_p1	Chr01	2266067	2266396	Jr10_01820_p1	Chr10	1110509	1110651
Jr01_03220_p1	Chr01	2305578	2305883	Jr10_01840_p1	Chr10	1117712	1118067
Jr01_03230_p1	Chr01	2312725	2313930	Jr10_01850_p1	Chr10	1119391	1120632
Jr01_03330_p1	Chr01	2497021	2500680	Jr10_01860_p1	Chr10	1136281	1139928
Jr01_03340_p1	Chr01	2505954	2506219	Jr10_01870_p1	Chr10	1143344	1143625
Jr01_03390_p1	Chr01	2522773	2523440	Jr10_01900_p1	Chr10	1152430	1152652
Jr01_03400_p1	Chr01	2538452	2538598	Jr10_01910_p1	Chr10	1156706	1156801
Jr01_03410_p1	Chr01	2548917	2549016	Jr10_01920_p1	Chr10	1163954	1164053
Jr01_03430_p1	Chr01	2553276	2553300	Jr10_01930_p1	Chr10	1169181	1169201
Jr01_03450_p1	Chr01	2559662	2559676	Jr10_01940_p1	Chr10	1174413	1175028
Jr01_03460_p1	Chr01	2582318	2582348	Jr10_01960_p1	Chr10	1189177	1189318
Jr01_03470_p1	Chr01	2597229	2597554	Jr10_01970_p1	Chr10	1207564	1207750
Jr01_31730_p1	Chr01	42750150	42750764	Jr10_23980_p1	Chr10	35578904	35579534
Jr01_31740_p1	Chr01	42764508	42765056	Jr10_23990_p1	Chr10	35591235	35591834
Jr01_31750_p1	Chr01	42779479	42779573	Jr10_24000_p1	Chr10	35599813	35599914
Jr01_31780_p1	Chr01	42787732	42788043	Jr10_24020_p1	Chr10	35622408	35622758
Jr01_31800_p1	Chr01	42822380	42822419	Jr10_24040_p1	Chr10	35658998	35659348
Jr01_31810_p1	Chr01	42831346	42831533	Jr10_24050_p1	Chr10	35677917	35678146
Jr01_31820_p1	Chr01	42840504	42840755	Jr10_24060_p1	Chr10	35682996	35683247
Jr01_31840_p1	Chr01	42847018	42847178	Jr10_24070_p1	Chr10	35689632	35689792
Jr01_31880_p1	Chr01	42879037	42879100	Jr10_24120_p1	Chr10	35706887	35707206
Jr01_31890_p1	Chr01	42899117	42899951	Jr10_24140_p1	Chr10	35717075	35717912
Jr01_31900_p1	Chr01	42901756	42902799	Jr10_24160_p1	Chr10	35723153	35724109
Jr01_31910_p1	Chr01	42909567	42909782	Jr10_24170_p1	Chr10	35769686	35769883
Jr01_31930_p1	Chr01	42931832	42932254	Jr10_24180_p1	Chr10	35796210	35796683
Jr01_31950_p1	Chr01	42950359	42951048	Jr10_24190_p1	Chr10	35804797	35805489
Jr01_31980_p1	Chr01	42982365	42983990	Jr10_24200_p1	Chr10	35826412	35826615
Jr01_32020_p1	Chr01	43018186	43018744	Jr10_24220_p1	Chr10	35854542	35855133
Jr01_32040_p1	Chr01	43033381	43033629	Jr10_24240_p1	Chr10	35867643	35867864
Jr01_32130_p1	Chr01	43115152	43115233	Jr10_24280_p1	Chr10	35904176	35904228
Jr01_32200_p1	Chr01	43168861	43169244	Jr10_24320_p1	Chr10	35944387	35944452
Jr01_32210_p1	Chr01	43179224	43179648	Jr10_24330_p1	Chr10	35951731	35952155
Jr01_32220_p1	Chr01	43212566	43212581	Jr10_24340_p1	Chr10	35962666	35963478
Jr01_32240_p1	Chr01	43218674	43218692	Jr10_24360_p1	Chr10	35971731	35972030
Jr01_32260_p1	Chr01	43250597	43250768	Jr10_24380_p1	Chr10	36004979	36005147
Jr01_32290_p1	Chr01	43287973	43288211	Jr10_24390_p1	Chr10	36031757	36031873
Jr01_32330_p1	Chr01	43303306	43303344	Jr10_24400_p1	Chr10	36052850	36053211
Jr01_32370_p1	Chr01	43317516	43319542	Jr10_24420_p1	Chr10	36055561	36057542
Jr01_32410_p1	Chr01	43334829	43334913	Jr10_24430_p1	Chr10	36076051	36076488
Jr01_32440_p1	Chr01	43365440	43365703	Jr10_24440_p1	Chr10	36100444	36100704
Jr01_32460_p1	Chr01	43383204	43383344	Jr10_24450_p1	Chr10	36105173	36105312
Jr01_32510_p1	Chr01	43404499	43404877	Jr10_24470_p1	Chr10	36126661	36127184
Jr01_32590_p1	Chr01	43462715	43462834	Jr10_24480_p1	Chr10	36140373	36140596
Jr01_32600_p1	Chr01	43491676	43491995	Jr10_24510_p1	Chr10	36217284	36217603
Jr01_32670_p1	Chr01	43547119	43547220	Jr10_24520_p1	Chr10	36221910	36222242
Jr01_32680_p1	Chr01	43552469	43552842	Jr10_24530_p1	Chr10	36228349	36228388
Jr01_32690_p1	Chr01	43559493	43559887	Jr10_24540_p1	Chr10	36231896	36235181
Jr01_32740_p1	Chr01	43607463	43607662	Jr10_24610_p1	Chr10	36268437	36268520
Jr01_32750_p1	Chr01	43615088	43615310	Jr10_24620_p1	Chr10	36275311	36275892
Jr01_32770_p1	Chr01	43628199	43628381	Jr10_24660_p1	Chr10	36308437	36308619
Jr01_32780_p1	Chr01	43634994	43635091	Jr10_24670_p1	Chr10	36315132	36315265
Jr01_32820_p1	Chr01	43669508	43669615	Jr10_24680_p1	Chr10	36337715	36337816
Jr01_32870_p1	Chr01	43677446	43677543	Jr10_24710_p1	Chr10	36350337	36350509
Jr01_32880_p1	Chr01	43680241	43680367	Jr10_24740_p1	Chr10	36352463	36353269
Jr01_32890_p1	Chr01	43686368	43687971	Jr10_24750_p1	Chr10	36357756	36359338
Jr01_32900_p1	Chr01	43694230	43694602	Jr10_24760_p1	Chr10	36370840	36371036
Jr01_32950_p1	Chr01	43703257	43703315	Jr10_24790_p1	Chr10	36378784	36378833
Jr01_33000_p1	Chr01	43715440	43715648	Jr10_24810_p1	Chr10	36385477	36385685
Jr01_33100_p1	Chr01	43821707	43822063	Jr10_24840_p1	Chr10	36412076	36412432
Jr01_33220_p1	Chr01	43851033	43851194	Jr10_24870_p1	Chr10	36424038	36424126
Jr01_33240_p1	Chr01	43863376	43863604	Jr10_24880_p1	Chr10	36429652	36429928
Jr01_33320_p1	Chr01	43911322	43911461	Jr10_24900_p1	Chr10	36534793	36534912
Jr01_33350_p1	Chr01	43979605	43979829	Jr10_24910_p1	Chr10	36557267	36557491
Jr01_33390_p1	Chr01	43992145	43992480	Jr10_24930_p1	Chr10	36576211	36576318
Jr01_33400_p1	Chr01	44017189	44017362	Jr10_24960_p1	Chr10	36588633	36589339
Jr01_33430_p1	Chr01	44041237	44041469	Jr10_24970_p1	Chr10	36596641	36597087
Jr01_33490_p1	Chr01	44113907	44114316	Jr10_25070_p1	Chr10	36766105	36766480
Jr01_33550_p1	Chr01	44186086	44186315	Jr10_25090_p1	Chr10	36781586	36781824
Jr01_07950_p1	Chr01	5435997	5436244	Jr10_05570_p1	Chr10	3648373	3648718
Jr01_07960_p1	Chr01	5437988	5438090	Jr10_05580_p1	Chr10	3649636	3649879
Jr01_07970_p1	Chr01	5442615	5442901	Jr10_05610_p1	Chr10	3660548	3661885
Jr01_07980_p1	Chr01	5448632	5448669	Jr10_05620_p1	Chr10	3668063	3668082
Jr01_08080_p1	Chr01	5522643	5522765	Jr10_05640_p1	Chr10	3676170	3676790
Jr01_08100_p1	Chr01	5537767	5538080	Jr10_05660_p1	Chr10	3681471	3681772
Jr01_08110_p1	Chr01	5556782	5556861	Jr10_05760_p1	Chr10	3736931	3737008
Jr01_08130_p1	Chr01	5583957	5584469	Jr10_05810_p1	Chr10	3749948	3750005
Jr01_08150_p1	Chr01	5600997	5601436	Jr10_05820_p1	Chr10	3765943	3766029
Jr01_08190_p1	Chr01	5664239	5664441	Jr10_05830_p1	Chr10	3773425	3773524
Jr01_08280_p1	Chr01	5705879	5706217	Jr10_05840_p1	Chr10	3784139	3784564
Jr01_08300_p1	Chr01	5753396	5753513	Jr10_05880_p1	Chr10	3828854	3828968
Jr01_08320_p1	Chr01	5768397	5768509	Jr10_05930_p1	Chr10	3874484	3874834
Jr01_08380_p1	Chr01	5807347	5809170	Jr10_05950_p1	Chr10	3884367	3884599
Jr01_08390_p1	Chr01	5826213	5826344	Jr10_05960_p1	Chr10	3900438	3900611
Jr01_08420_p1	Chr01	5841779	5842146	Jr10_05970_p1	Chr10	3913228	3913621
Jr01_08460_p1	Chr01	5861701	5863196	Jr10_05980_p1	Chr10	3917670	3919138
Jr01_08470_p1	Chr01	5868826	5869329	Jr10_06000_p1	Chr10	3926974	3927168
Jr01_08490_p1	Chr01	5896154	5896350	Jr10_06010_p1	Chr10	3935768	3936002
Jr01_08550_p1	Chr01	5919598	5919989	Jr10_06020_p1	Chr10	3941266	3941407
Jr01_08590_p1	Chr01	5970184	5970316	Jr10_06040_p1	Chr10	3966385	3966517
Jr01_08600_p1	Chr01	5991898	5992026	Jr10_06060_p1	Chr10	3976866	3976983
Jr01_08620_p1	Chr01	6003320	6003458	Jr10_06070_p1	Chr10	3979036	3979174
Jr01_08640_p1	Chr01	6016460	6016552	Jr10_06080_p1	Chr10	3984248	3984466
Jr01_08660_p1	Chr01	6049077	6049474	Jr10_06100_p1	Chr10	4007973	4008337
Jr01_08730_p1	Chr01	6110123	6110269	Jr10_06110_p1	Chr10	4009083	4009169
Jr01_08810_p1	Chr01	6207980	6208078	Jr10_06130_p1	Chr10	4018337	4018765
Jr01_08860_p1	Chr01	6239829	6240599	Jr10_06140_p1	Chr10	4027265	4028035
Jr01_08900_p1	Chr01	6278175	6278306	Jr10_06150_p1	Chr10	4058559	4058657
Jr01_09040_p1	Chr01	6381475	6381704	Jr10_06250_p1	Chr10	4157392	4157448
Jr01_27070_p1	Chr01	37022475	37022567	Jr10_19560_p1	Chr10	29254306	29254335
Jr01_27100_p1	Chr01	37073276	37074158	Jr10_19610_p1	Chr10	29310670	29311546
Jr01_27140_p1	Chr01	37107405	37109902	Jr10_19630_p1	Chr10	29375807	29378589
Jr01_27150_p1	Chr01	37122203	37122493	Jr10_19660_p1	Chr10	29383451	29383741
Jr01_27270_p1	Chr01	37264905	37265384	Jr10_19730_p1	Chr10	29487523	29487636
Jr01_27290_p1	Chr01	37284191	37284531	Jr10_19760_p1	Chr10	29512561	29512939
Jr01_27320_p1	Chr01	37331650	37331857	Jr10_19790_p1	Chr10	29549630	29549765
Jr01_27330_p1	Chr01	37383962	37384080	Jr10_19820_p1	Chr10	29573248	29574417
Jr01_27340_p1	Chr01	37429542	37429782	Jr10_19840_p1	Chr10	29638735	29638761
Jr01_27360_p1	Chr01	37474813	37475091	Jr10_19860_p1	Chr10	29663805	29663975
Jr01_27410_p1	Chr01	37546671	37546760	Jr10_19910_p1	Chr10	29742522	29742581
Jr01_27430_p1	Chr01	37558964	37559307	Jr10_19950_p1	Chr10	29804745	29805103
Jr01_27440_p1	Chr01	37590795	37592072	Jr10_19960_p1	Chr10	29853603	29853989
Jr01_27500_p1	Chr01	37640334	37640725	Jr10_19990_p1	Chr10	29871062	29871427
Jr01_27540_p1	Chr01	37688925	37689017	Jr10_20010_p1	Chr10	29936543	29936635
Jr01_27550_p1	Chr01	37690783	37691068	Jr10_20020_p1	Chr10	29939585	29939787
Jr01_27620_p1	Chr01	37759677	37760156	Jr10_20070_p1	Chr10	30015650	30015863
Jr01_27630_p1	Chr01	37810532	37812181	Jr10_20080_p1	Chr10	30044325	30045842
Jr01_27650_p1	Chr01	37848487	37848714	Jr10_20120_p1	Chr10	30099686	30100037
Jr01_27670_p1	Chr01	37903774	37906396	Jr10_20130_p1	Chr10	30106398	30106460
Jr01_27690_p1	Chr01	37976016	37976777	Jr10_20200_p1	Chr10	30596753	30596824
Jr01_27720_p1	Chr01	37993571	37993723	Jr10_20240_p1	Chr10	30633013	30633150
Jr01_27790_p1	Chr01	38077124	38077583	Jr10_20320_p1	Chr10	30807828	30807918
Jr01_27850_p1	Chr01	38157895	38157922	Jr10_20340_p1	Chr10	30826435	30826468
Jr01_27940_p1	Chr01	38284157	38284318	Jr10_20390_p1	Chr10	30866844	30867530
Jr01_27950_p1	Chr01	38348613	38349386	Jr10_20440_p1	Chr10	30928227	30928480
Jr01_27960_p1	Chr01	38398507	38399325	Jr10_20480_p1	Chr10	30951159	30951881
Jr01_27980_p1	Chr01	38420580	38420721	Jr10_20490_p1	Chr10	30961205	30961327
Jr01_28000_p1	Chr01	38442935	38443262	Jr10_20510_p1	Chr10	30986571	30987854
Jr01_14850_p1	Chr01	12487012	12489333	Jr10_10580_p1	Chr10	8129642	8129950
Jr01_14970_p1	Chr01	12623776	12623904	Jr10_10590_p1	Chr10	8186523	8187764
Jr01_14980_p1	Chr01	12649270	12649784	Jr10_10600_p1	Chr10	8215087	8215604
Jr01_15010_p2	Chr01	12670504	12670664	Jr10_10610_p1	Chr10	8220218	8220916
Jr01_15050_p1	Chr01	12697802	12698280	Jr10_10640_p1	Chr10	8227514	8228547
Jr01_15150_p1	Chr01	12886326	12886439	Jr10_10670_p1	Chr10	8252184	8252193
Jr01_15160_p1	Chr01	12894398	12894573	Jr10_10680_p1	Chr10	8253522	8253939
Jr01_15190_p1	Chr01	12950557	12950964	Jr10_10740_p1	Chr10	8285292	8285608
Jr01_15240_p1	Chr01	13041151	13041540	Jr10_10750_p1	Chr10	8298423	8298806
Jr01_15260_p1	Chr01	13071853	13072199	Jr10_10760_p1	Chr10	8326386	8326970
Jr01_15290_p2	Chr01	13130391	13131042	Jr10_10820_p1	Chr10	8370625	8370813
Jr01_15300_p1	Chr01	13139147	13139257	Jr10_10830_p1	Chr10	8379628	8379858
Jr01_15310_p1	Chr01	13169524	13169622	Jr10_10840_p1	Chr10	8398733	8398831
Jr01_15320_p1	Chr01	13199991	13200730	Jr10_10850_p1	Chr10	8408622	8408700
Jr01_15350_p1	Chr01	13207939	13208070	Jr10_10860_p1	Chr10	8421739	8421842
Jr01_15460_p1	Chr01	13285547	13285966	Jr10_10880_p1	Chr10	8472074	8472466
Jr01_15500_p1	Chr01	13295777	13295815	Jr10_10900_p1	Chr10	8492026	8492283
Jr01_15530_p1	Chr01	13322038	13322079	Jr10_10910_p1	Chr10	8510648	8510861
Jr01_15540_p1	Chr01	13334757	13338350	Jr10_10920_p1	Chr10	8517296	8520892
Jr01_15550_p1	Chr01	13361540	13361835	Jr10_10930_p1	Chr10	8553588	8553895
Jr01_15600_p1	Chr01	13455492	13455546	Jr10_11000_p1	Chr10	8598625	8598715
Jr01_15670_p1	Chr01	13526371	13526581	Jr10_11040_p1	Chr10	8654143	8654337
Jr01_15760_p1	Chr01	13629933	13630017	Jr10_11110_p1	Chr10	8729031	8729083
Jr01_15790_p1	Chr01	13757222	13757429	Jr10_11120_p1	Chr10	8740734	8740998
Jr01_15810_p1	Chr01	13763429	13763797	Jr10_11140_p1	Chr10	8768265	8768460
Jr01_15820_p1	Chr01	13766665	13766918	Jr10_11150_p1	Chr10	8770857	8771237
Jr01_00010_p1	Chr01	21170	21748	Jr10_02000_p1	Chr10	1227728	1228306
Jr01_00050_p1	Chr01	31704	32141	Jr10_02020_p1	Chr10	1236895	1237708
Jr01_00070_p1	Chr01	42071	42689	Jr10_02040_p1	Chr10	1241551	1241786
Jr01_00080_p1	Chr01	46961	47109	Jr10_02050_p1	Chr10	1246689	1247324
Jr01_00090_p1	Chr01	59583	59733	Jr10_02060_p1	Chr10	1262482	1262615
Jr01_00100_p1	Chr01	70394	70575	Jr10_02070_p1	Chr10	1269282	1269524
Jr01_00120_p1	Chr01	87089	87251	Jr10_02080_p1	Chr10	1282304	1282546
Jr01_00130_p1	Chr01	97383	97699	Jr10_02100_p1	Chr10	1296678	1297634
Jr01_00200_p1	Chr01	116313	116586	Jr10_02110_p1	Chr10	1300222	1300396
Jr01_00250_p1	Chr01	166088	166346	Jr10_02120_p1	Chr10	1316283	1316554
Jr01_00260_p1	Chr01	187786	187991	Jr10_02130_p1	Chr10	1338583	1338715
Jr01_00270_p1	Chr01	207575	207832	Jr10_02140_p1	Chr10	1354103	1354354
Jr01_00280_p1	Chr01	212932	213189	Jr10_02150_p1	Chr10	1356677	1357004
Jr01_00290_p1	Chr01	217202	217382	Jr10_02160_p1	Chr10	1360784	1360967
Jr01_00370_p1	Chr01	272755	272898	Jr10_02250_p1	Chr10	1441372	1441517
Jr01_00480_p1	Chr01	365784	366127	Jr10_02360_p1	Chr10	1500092	1500320
Jr01_00490_p1	Chr01	376557	376839	Jr10_02370_p1	Chr10	1515046	1515255
Jr01_00550_p1	Chr01	395709	395836	Jr10_02410_p1	Chr10	1532546	1532673
Jr01_00570_p1	Chr01	402978	403044	Jr10_02420_p1	Chr10	1536604	1536670
Jr01_00580_p1	Chr01	407387	407619	Jr10_02450_p1	Chr10	1539332	1539544
Jr01_00590_p1	Chr01	413959	414147	Jr10_02480_p1	Chr10	1543573	1543761
Jr01_00610_p1	Chr01	419754	419943	Jr10_02540_p1	Chr10	1566354	1566549
Jr01_00620_p1	Chr01	426064	426232	Jr10_02560_p1	Chr10	1572568	1572660
Jr01_00650_p1	Chr01	441759	441964	Jr10_02580_p1	Chr10	1583148	1583245
Jr01_00660_p1	Chr01	464192	464401	Jr10_02610_p1	Chr10	1625855	1625920
Jr01_30800_p1	Chr01	41714933	41715118	Jr10_23290_p1	Chr10	34567350	34567551
Jr01_30810_p1	Chr01	41723710	41725050	Jr10_23320_p1	Chr10	34676654	34676876
Jr01_30820_p1	Chr01	41737144	41737414	Jr10_23330_p1	Chr10	34690067	34690389
Jr01_30840_p1	Chr01	41755407	41755525	Jr10_23360_p1	Chr10	34709984	34710093
Jr01_30870_p1	Chr01	41791142	41791254	Jr10_23380_p1	Chr10	34732067	34732179
Jr01_30980_p1	Chr01	41828933	41829033	Jr10_23440_p1	Chr10	34828912	34829124
Jr01_31020_p1	Chr01	41862560	41862872	Jr10_23450_p1	Chr10	34851295	34851604
Jr01_31110_p1	Chr01	41964520	41965296	Jr10_23520_p1	Chr10	34951788	34951917
Jr01_31150_p1	Chr01	41997512	41998162	Jr10_23560_p1	Chr10	35001562	35002209
Jr01_31220_p1	Chr01	42073244	42073463	Jr10_23610_p1	Chr10	35093122	35093374
Jr01_31230_p1	Chr01	42082825	42082915	Jr10_23620_p2	Chr10	35097922	35098043
Jr01_31300_p1	Chr01	42166375	42166569	Jr10_23690_p1	Chr10	35155619	35155667
Jr01_31310_p1	Chr01	42181731	42182213	Jr10_23700_p1	Chr10	35165774	35166377
Jr01_31320_p1	Chr01	42186186	42186374	Jr10_23710_p1	Chr10	35173299	35173621
Jr01_31330_p1	Chr01	42188767	42189366	Jr10_23720_p1	Chr10	35176249	35176938
Jr01_31350_p1	Chr01	42203520	42203785	Jr10_23730_p1	Chr10	35179821	35179914
Jr01_31380_p1	Chr01	42233496	42234133	Jr10_23760_p1	Chr10	35213306	35213913
Jr01_31390_p1	Chr01	42259407	42259515	Jr10_23780_p1	Chr10	35243926	35243956
Jr01_31410_p1	Chr01	42279908	42280377	Jr10_23790_p1	Chr10	35255432	35255832
Jr01_31420_p1	Chr01	42283942	42284095	Jr10_23820_p1	Chr10	35262602	35262698
Jr01_31450_p1	Chr01	42292118	42292229	Jr10_23830_p1	Chr10	35270176	35270238
Jr01_31490_p1	Chr01	42312643	42313128	Jr10_23870_p1	Chr10	35289156	35289329
Jr01_31520_p1	Chr01	42345047	42345191	Jr10_23890_p1	Chr10	35320160	35320448
Jr01_20290_p1	Chr01	20229186	20230781	Jr10_14830_p1	Chr10	14221359	14221433
Jr01_20340_p1	Chr01	20295393	20295886	Jr10_14840_p1	Chr10	14246215	14246668
Jr01_20370_p1	Chr01	20320722	20321033	Jr10_14880_p1	Chr10	14297419	14297593
Jr01_20410_p1	Chr01	20393949	20394206	Jr10_14890_p1	Chr10	14329838	14330035
Jr01_20420_p1	Chr01	20425662	20425782	Jr10_14930_p1	Chr10	14367257	14367398
Jr01_20550_p1	Chr01	20631550	20631795	Jr10_14940_p1	Chr10	14420793	14421041
Jr01_20560_p1	Chr01	20713259	20713620	Jr10_14970_p1	Chr10	14471841	14471869
Jr01_20680_p1	Chr01	21071899	21072198	Jr10_14980_p1	Chr10	14481827	14482591
Jr01_20720_p1	Chr01	21150645	21150744	Jr10_14990_p1	Chr10	14531218	14531314
Jr01_20730_p1	Chr01	21172960	21173697	Jr10_15000_p1	Chr10	14554258	14554775
Jr01_20770_p1	Chr01	21260367	21261758	Jr10_15030_p1	Chr10	14590577	14591935
Jr01_20870_p1	Chr01	21358670	21358895	Jr10_15060_p1	Chr10	14626584	14626907
Jr01_20890_p2	Chr01	21363746	21364089	Jr10_15070_p1	Chr10	14628747	14628912
Jr01_20910_p1	Chr01	21377628	21377691	Jr10_15080_p1	Chr10	14637685	14637989
Jr01_21030_p1	Chr01	21696263	21696422	Jr10_15120_p1	Chr10	14697384	14697504
Jr01_21090_p1	Chr01	21911007	21911234	Jr10_15160_p1	Chr10	14801372	14801586
Jr01_21100_p1	Chr01	21919502	21924823	Jr10_15170_p1	Chr10	14815189	14820483
Jr01_21110_p1	Chr01	21961232	21961319	Jr10_15190_p1	Chr10	14906565	14906652
Jr01_21170_p1	Chr01	22016899	22017446	Jr10_15230_p1	Chr10	14960677	14960706
Jr01_21240_p1	Chr01	22289722	22289865	Jr10_15280_p1	Chr10	15264513	15264656
Jr01_33550_p1	Chr01	44186086	44186315	Jr10_25240_p1	Chr10	36877364	36877759
Jr01_33610_p1	Chr01	44214234	44214461	Jr10_25330_p1	Chr10	36947219	36947751
Jr01_33630_p1	Chr01	44242553	44242651	Jr10_25350_p1	Chr10	36980153	36980275
Jr01_33640_p1	Chr01	44247837	44248023	Jr10_25400_p1	Chr10	37015457	37015635
Jr01_33660_p1	Chr01	44270299	44270697	Jr10_25460_p1	Chr10	37070504	37070845
Jr01_33750_p1	Chr01	44377132	44377210	Jr10_25490_p1	Chr10	37083399	37083526
Jr01_33880_p1	Chr01	44483202	44484407	Jr10_25570_p1	Chr10	37210554	37211756
Jr01_33950_p1	Chr01	44525451	44525590	Jr10_25610_p1	Chr10	37242130	37243746
Jr01_33980_p1	Chr01	44559577	44559664	Jr10_25630_p1	Chr10	37283738	37283841
Jr01_34060_p2	Chr01	44602114	44602233	Jr10_25640_p1	Chr10	37297522	37297546
Jr01_34090_p1	Chr01	44637923	44638150	Jr10_25660_p1	Chr10	37315749	37317875
Jr01_34180_p1	Chr01	44699808	44700027	Jr10_25740_p1	Chr10	37391305	37391503
Jr01_34300_p1	Chr01	44793078	44793189	Jr10_25760_p1	Chr10	37397502	37397664
Jr01_34360_p1	Chr01	44819601	44819690	Jr10_25770_p1	Chr10	37414171	37414260
Jr01_34480_p1	Chr01	44894515	44894803	Jr10_25810_p1	Chr10	37507163	37507239
Jr01_34550_p1	Chr01	44956747	44956953	Jr10_25850_p1	Chr10	37513039	37513262
Jr01_34590_p1	Chr01	44961227	44961847	Jr10_25860_p1	Chr10	37522224	37522790
Jr01_14400_p1	Chr01	11844552	11844583	Jr10_10150_p1	Chr10	7807305	7807538
Jr01_14440_p1	Chr01	11867227	11867478	Jr10_10190_p1	Chr10	7824732	7824812
Jr01_14460_p1	Chr01	11909325	11909438	Jr10_10230_p1	Chr10	7850119	7850889
Jr01_14470_p1	Chr01	11914644	11914758	Jr10_10260_p1	Chr10	7860826	7860985
Jr01_14480_p1	Chr01	11941110	11942627	Jr10_10320_p1	Chr10	7952338	7953771
Jr01_14540_p1	Chr01	12013121	12013387	Jr10_10340_p1	Chr10	7958061	7958330
Jr01_14550_p1	Chr01	12028483	12028628	Jr10_10350_p1	Chr10	7979973	7980047
Jr01_14590_p1	Chr01	12058464	12061535	Jr10_10380_p1	Chr10	8004951	8008025
Jr01_14600_p1	Chr01	12067382	12067642	Jr10_10390_p1	Chr10	8012577	8012841
Jr01_14620_p1	Chr01	12087828	12088052	Jr10_10460_p1	Chr10	8044539	8044905
Jr01_14630_p1	Chr01	12094225	12094425	Jr10_10480_p1	Chr10	8050380	8050570
Jr01_14660_p1	Chr01	12109343	12110041	Jr10_10520_p1	Chr10	8084471	8085175
Jr01_14690_p1	Chr01	12164663	12166210	Jr10_10530_p1	Chr10	8093674	8095131
Jr01_14730_p1	Chr01	12260340	12262709	Jr10_10580_p1	Chr10	8129642	8129950
Jr01_25900_p1	Chr01	35570320	35571414	Jr10_18490_p1	Chr10	25637255	25638331
Jr01_25980_p1	Chr01	35701484	35701612	Jr10_18600_p1	Chr10	25851336	25851464
Jr01_26040_p1	Chr01	35742185	35742194	Jr10_18620_p1	Chr10	25908777	25908870
Jr01_26080_p1	Chr01	35788484	35788724	Jr10_18660_p1	Chr10	25948124	25948357
Jr01_26100_p1	Chr01	35806473	35806927	Jr10_18700_p1	Chr10	26032495	26032910
Jr01_26160_p1	Chr01	35897632	35899251	Jr10_18710_p1	Chr10	26054510	26054615
Jr01_26230_p1	Chr01	35935771	35935816	Jr10_18720_p1	Chr10	26064661	26064820
Jr01_26290_p1	Chr01	36049094	36049198	Jr10_18750_p1	Chr10	26144960	26145064
Jr01_26320_p1	Chr01	36065820	36066189	Jr10_18770_p1	Chr10	26192018	26192500
Jr01_26340_p1	Chr01	36087402	36087820	Jr10_18790_p1	Chr10	26217752	26217773
Jr01_26470_p1	Chr01	36270017	36270394	Jr10_18840_p1	Chr10	26629601	26630014
Jr01_26480_p1	Chr01	36295827	36295951	Jr10_18860_p1	Chr10	26658377	26658498
Jr01_26490_p1	Chr01	36361573	36361774	Jr10_18870_p1	Chr10	26704061	26704336
Jr01_26500_p1	Chr01	36367339	36367409	Jr10_18890_p1	Chr10	26716825	26717476
Jr01_12290_p1	Chr01	9374754	9375226	Jr10_08870_p1	Chr10	6352395	6352932
Jr01_12310_p1	Chr01	9399138	9399750	Jr10_08890_p1	Chr10	6367753	6368344
Jr01_12320_p1	Chr01	9403962	9404343	Jr10_08900_p1	Chr10	6372574	6372769
Jr01_12350_p1	Chr01	9429663	9429906	Jr10_08910_p1	Chr10	6393164	6393410
Jr01_12390_p1	Chr01	9439970	9441433	Jr10_08930_p1	Chr10	6412900	6414360
Jr01_12420_p1	Chr01	9446912	9446920	Jr10_08940_p1	Chr10	6417079	6417219
Jr01_12460_p1	Chr01	9483845	9483907	Jr10_08970_p1	Chr10	6420547	6421053
Jr01_12470_p1	Chr01	9498854	9499258	Jr10_08990_p1	Chr10	6431741	6432166
Jr01_12500_p1	Chr01	9539257	9539322	Jr10_09000_p1	Chr10	6434432	6434513
Jr01_12540_p1	Chr01	9621550	9621975	Jr10_09030_p1	Chr10	6478377	6478802
Jr01_12550_p1	Chr01	9664924	9665263	Jr10_09040_p1	Chr10	6533217	6533544
Jr01_12570_p1	Chr01	9686895	9687011	Jr10_09050_p1	Chr10	6545859	6546108
Jr01_24510_p1	Chr01	33041687	33042061	Jr10_17470_p1	Chr10	23124141	23124689
Jr01_24600_p1	Chr01	33207119	33207553	Jr10_17570_p1	Chr10	23420005	23420457
Jr01_24610_p1	Chr01	33235077	33235274	Jr10_17580_p1	Chr10	23531567	23531712
Jr01_24640_p1	Chr01	33403007	33403373	Jr10_17610_p1	Chr10	23627025	23627391
Jr01_24780_p1	Chr01	33464954	33465131	Jr10_17620_p1	Chr10	23786408	23786528
Jr01_24830_p1	Chr01	33656721	33656987	Jr10_17670_p1	Chr10	23863493	23863635
Jr01_24860_p1	Chr01	33716409	33716718	Jr10_17690_p1	Chr10	23930158	23930329
Jr01_24870_p1	Chr01	33739021	33739352	Jr10_17710_p1	Chr10	23952086	23952439
Jr01_24890_p1	Chr01	33769288	33769867	Jr10_17740_p1	Chr10	23992637	23993205
Jr01_24980_p1	Chr01	33846546	33846696	Jr10_17790_p1	Chr10	24111856	24112006
Jr01_25720_p1	Chr01	35165718	35165850	Jr10_18170_p1	Chr10	25064503	25064662
Jr01_25750_p1	Chr01	35207276	35208163	Jr10_18190_p1	Chr10	25075511	25075685
Jr01_25810_p1	Chr01	35397712	35398056	Jr10_18220_p1	Chr10	25139853	25140149
Jr01_25830_p1	Chr01	35506472	35506655	Jr10_18240_p1	Chr10	25155113	25155476
Jr01_25860_p1	Chr01	35517653	35518162	Jr10_18250_p2	Chr10	25160535	25160773
Jr01_25870_p1	Chr01	35523283	35524769	Jr10_18260_p1	Chr10	25186028	25187514
Jr01_25880_p1	Chr01	35551031	35551561	Jr10_18330_p1	Chr10	25286759	25287259
Jr01_25890_p1	Chr01	35555107	35555143	Jr10_18340_p1	Chr10	25291858	25291990
Jr01_25950_p1	Chr01	35656875	35657144	Jr10_18420_p1	Chr10	25509337	25509453
Jr01_25230_p1	Chr01	34166534	34167083	Jr10_17820_p1	Chr10	24250993	24251074
Jr01_25240_p1	Chr01	34173752	34173829	Jr10_17830_p1	Chr10	24255426	24257091
Jr01_25260_p1	Chr01	34274288	34274911	Jr10_17890_p1	Chr10	24360208	24360831
Jr01_25270_p1	Chr01	34309727	34310107	Jr10_17950_p1	Chr10	24541080	24541238
Jr01_25320_p1	Chr01	34379018	34379297	Jr10_17980_p1	Chr10	24681521	24681792
Jr01_25410_p1	Chr01	34507942	34508631	Jr10_18010_p1	Chr10	24735821	24735853
Jr01_25430_p1	Chr01	34575881	34576070	Jr10_18050_p1	Chr10	24890010	24890196
Jr01_25550_p1	Chr01	34805283	34805511	Jr10_18170_p1	Chr10	25064503	25064662
Jr01_25650_p1	Chr01	35047775	35047848	Jr10_18210_p1	Chr10	25101236	25101332
Jr01_13190_p1	Chr01	10539575	10540457	Jr10_09970_p1	Chr10	7310914	7312088
Jr01_13200_p1	Chr01	10566944	10567823	Jr10_09930_p1	Chr10	7244755	7245968
Jr01_13240_p1	Chr01	10672681	10672941	Jr10_09890_p1	Chr10	7221359	7221442
Jr01_13260_p1	Chr01	10683328	10683417	Jr10_09870_p1	Chr10	7206241	7206516
Jr01_13390_p1	Chr01	10794925	10795148	Jr10_09820_p1	Chr10	7165791	7165958
Jr01_13400_p1	Chr01	10802678	10802829	Jr10_09790_p1	Chr10	7152182	7152307
Jr01_13480_p1	Chr01	10867088	10867179	Jr10_09760_p1	Chr10	7104348	7104582
Jr01_13490_p1	Chr01	10874140	10874663	Jr10_09750_p1	Chr10	7095044	7095706
Jr01_13560_p1	Chr01	10916777	10917063	Jr10_09740_p1	Chr10	7091597	7091677
Jr01_13590_p1	Chr01	10946304	10946498	Jr10_09720_p1	Chr10	7083755	7083865
Jr01_13600_p1	Chr01	10963120	10963219	Jr10_09700_p1	Chr10	7075225	7075492
Jr01_13670_p1	Chr01	11011797	11012037	Jr10_09660_p1	Chr10	7045875	7046846
Jr01_13730_p1	Chr01	11051512	11051751	Jr10_09630_p1	Chr10	7010493	7010590
Jr01_13760_p1	Chr01	11055365	11055474	Jr10_09580_p1	Chr10	6976557	6976736
Jr01_13770_p1	Chr01	11063942	11064101	Jr10_09570_p1	Chr10	6973505	6973803
Jr01_13800_p1	Chr01	11127572	11127841	Jr10_09550_p1	Chr10	6954097	6954205
Jr01_13820_p1	Chr01	11132712	11132732	Jr10_09540_p1	Chr10	6944855	6946555
Jr01_13830_p1	Chr01	11142346	11142999	Jr10_09530_p1	Chr10	6934756	6934864
Jr01_13840_p1	Chr01	11159834	11160441	Jr10_09520_p1	Chr10	6926028	6926066
Jr01_13850_p1	Chr01	11178796	11178937	Jr10_09510_p1	Chr10	6909254	6909340
Jr01_13860_p1	Chr01	11198380	11198482	Jr10_09500_p1	Chr10	6889683	6889821
Jr01_13890_p1	Chr01	11234876	11235145	Jr10_09420_p1	Chr10	6848113	6848298
Jr01_13940_p1	Chr01	11262071	11262384	Jr10_09390_p1	Chr10	6791596	6791779
Jr01_14040_p1	Chr01	11396365	11396615	Jr10_09340_p1	Chr10	6720874	6720957
Jr01_14030_p1	Chr01	11405985	11406113	Jr10_09310_p1	Chr10	6720874	6721197
Jr01_14050_p1	Chr01	11414616	11415204	Jr10_09270_p1	Chr10	6690873	6691456
Jr01_14070_p1	Chr01	11439323	11439474	Jr10_09260_p1	Chr10	6680043	6680379
Jr01_14090_p1	Chr01	11529636	11529729	Jr10_09220_p1	Chr10	6630000	6630087
Jr01_14120_p1	Chr01	11544525	11544625	Jr10_09210_p1	Chr10	6625033	6626991
Jr01_14180_p1	Chr01	11572821	11572985	Jr10_09190_p1	Chr10	6615406	6615585
Jr01_14260_p1	Chr01	11640083	11640228	Jr10_09170_p1	Chr10	6607579	6607870
Jr01_14340_p1	Chr01	11714941	11715076	Jr10_09160_p1	Chr10	6600717	6600955
Jr01_11630_p1	Chr01	8789031	8789186	Jr10_08820_p1	Chr10	6296426	6296698
Jr01_11720_p1	Chr01	8880449	8880630	Jr10_08780_p1	Chr10	6226324	6226440
Jr01_11800_p1	Chr01	8952877	8953431	Jr10_08720_p1	Chr10	6110924	6111068
Jr01_11810_p1	Chr01	8971412	8971787	Jr10_08640_p1	Chr10	6070014	6070340
Jr01_11820_p1	Chr01	8973384	8973516	Jr10_08610_p1	Chr10	6032293	6033006
Jr01_11890_p1	Chr01	9015348	9015737	Jr10_08580_p1	Chr10	6024004	6024116
Jr01_11900_p1	Chr01	9039643	9041310	Jr10_08530_p1	Chr10	6011062	6012708
Jr01_11910_p1	Chr01	9069966	9070194	Jr10_08520_p1	Chr10	5983902	5984172
Jr01_11960_p1	Chr01	9097924	9098843	Jr10_08490_p1	Chr10	5960817	5961788
Jr01_11980_p1	Chr01	9107376	9107511	Jr10_08480_p1	Chr10	5950919	5951100
Jr01_11990_p1	Chr01	9114738	9115061	Jr10_08450_p1	Chr10	5926654	5927101
Jr01_12000_p1	Chr01	9146307	9146550	Jr10_08400_p1	Chr10	5895290	5895991
Jr01_12040_p1	Chr01	9163168	9163415	Jr10_08380_p1	Chr10	5878241	5878588
Jr01_12060_p1	Chr01	9170058	9170179	Jr10_08350_p1	Chr10	5868409	5868641
Jr01_12100_p1	Chr01	9201152	9201649	Jr10_08330_p1	Chr10	5844447	5844623
Jr01_12110_p1	Chr01	9214557	9214757	Jr10_08320_p1	Chr10	5835612	5835829
Jr01_12130_p1	Chr01	9234964	9238977	Jr10_08310_p1	Chr10	5814501	5818385
Jr01_12190_p1	Chr01	9280801	9280883	Jr10_08300_p1	Chr10	5806021	5806286
Jr01_12200_p1	Chr01	9297436	9297663	Jr10_08270_p1	Chr10	5801055	5801147
Jr01_12220_p1	Chr01	9306113	9306193	Jr10_08240_p1	Chr10	5790948	5791282
Jr01_12240_p1	Chr01	9317543	9317758	Jr10_08230_p1	Chr10	5766526	5766778
Jr01_22080_p1	Chr01	24419465	24419519	Jr10_16200_p1	Chr10	17745165	17745417
Jr01_22130_p1	Chr01	24572850	24572997	Jr10_16150_p1	Chr10	17677419	17678225
Jr01_22140_p1	Chr01	24645544	24646551	Jr10_16140_p1	Chr10	17616949	17617944
Jr01_22160_p1	Chr01	24741022	24741195	Jr10_16120_p1	Chr10	17576091	17576145
Jr01_22180_p1	Chr01	24759466	24759993	Jr10_16110_p1	Chr10	17546524	17547036
Jr01_22190_p1	Chr01	24769078	24769380	Jr10_16100_p1	Chr10	17544067	17544412
Jr01_22290_p1	Chr01	25063951	25064356	Jr10_16060_p1	Chr10	17398825	17400537
Jr01_22310_p1	Chr01	25141079	25141188	Jr10_16040_p1	Chr10	17375073	17375414
Jr01_22330_p1	Chr01	25164490	25164632	Jr10_16020_p1	Chr10	17316698	17316940
Jr01_22460_p1	Chr01	25924076	25924164	Jr10_15970_p1	Chr10	17231101	17231203
Jr01_29850_p1	Chr01	40689615	40689733	Jr11_29300_p1	Chr11	35754902	35755333
Jr01_29860_p1	Chr01	40706731	40706810	Jr11_29320_p1	Chr11	35776946	35777025
Jr01_29890_p1	Chr01	40740193	40740626	Jr11_29330_p1	Chr11	35809882	35810321
Jr01_29920_p1	Chr01	40764558	40764611	Jr11_29370_p1	Chr11	35838630	35838946
Jr01_29950_p1	Chr01	40804275	40806184	Jr11_29390_p1	Chr11	35854979	35855817
Jr01_29990_p1	Chr01	40840820	40841170	Jr11_29420_p1	Chr11	35863166	35863462
Jr01_29270_p1	Chr01	40054947	40055285	Jr11_28980_p1	Chr11	35565409	35566959
Jr01_29280_p1	Chr01	40058528	40058778	Jr11_28990_p1	Chr11	35569220	35569376
Jr01_29350_p1	Chr01	40104105	40104292	Jr11_29040_p1	Chr11	35591283	35591506
Jr01_29380_p1	Chr01	40169140	40169427	Jr11_29060_p1	Chr11	35615472	35615806
Jr01_29400_p1	Chr01	40199971	40200375	Jr11_29080_p1	Chr11	35625216	35625614
Jr01_29430_p1	Chr01	40230265	40230521	Jr11_29170_p1	Chr11	35675918	35675999
Jr01_25720_p1	Chr01	35165718	35165850	Jr12_17220_p1	Chr12	26033496	26033823
Jr01_25790_p1	Chr01	35283580	35283712	Jr12_17240_p1	Chr12	26047378	26047513
Jr01_25810_p1	Chr01	35397712	35398056	Jr12_17260_p1	Chr12	26093237	26093438
Jr01_25830_p1	Chr01	35506472	35506655	Jr12_17270_p1	Chr12	26113402	26113566
Jr01_25900_p1	Chr01	35570320	35571414	Jr12_17300_p1	Chr12	26133359	26134678
Jr01_25910_p1	Chr01	35602580	35602824	Jr12_17330_p1	Chr12	26166323	26166456
Jr01_25930_p1	Chr01	35623794	35624141	Jr12_17350_p1	Chr12	26206175	26206456
Jr01_25950_p1	Chr01	35656875	35657144	Jr12_17390_p1	Chr12	26210330	26210590
Jr01_29860_p1	Chr01	40706731	40706810	Jr12_19900_p1	Chr12	27938083	27938162
Jr01_29890_p1	Chr01	40740193	40740626	Jr12_19930_p1	Chr12	27970323	27970617
Jr01_29900_p1	Chr01	40745590	40745834	Jr12_19940_p1	Chr12	27972268	27972365
Jr01_29920_p1	Chr01	40764558	40764611	Jr12_19950_p1	Chr12	27980204	27980416
Jr01_29960_p1	Chr01	40810055	40810290	Jr12_19990_p1	Chr12	27983010	27983230
Jr01_30030_p1	Chr01	40878724	40879041	Jr12_20030_p1	Chr12	28009118	28009427
Jr01_30070_p1	Chr01	40896938	40897021	Jr12_20040_p1	Chr12	28012066	28012131
Jr01_26300_p1	Chr01	36051906	36052136	Jr12_17470_p1	Chr12	26278522	26278662
Jr01_26330_p1	Chr01	36078910	36079039	Jr12_17540_p1	Chr12	26321016	26321124
Jr01_26430_p1	Chr01	36189128	36189447	Jr12_17570_p1	Chr12	26343628	26343754
Jr01_26450_p1	Chr01	36229760	36229894	Jr12_17610_p1	Chr12	26362387	26362406
Jr01_26540_p1	Chr01	36446078	36446198	Jr12_17680_p1	Chr12	26405058	26405834
Jr01_26550_p1	Chr01	36463568	36463665	Jr12_17770_p1	Chr12	26465087	26465338
Jr01_26650_p1	Chr01	36674090	36674198	Jr12_17810_p1	Chr12	26494115	26494524
Jr01_26710_p1	Chr01	36789595	36789938	Jr12_17860_p1	Chr12	26526109	26526289
Jr01_28440_p1	Chr01	39054964	39055140	Jr12_19100_p1	Chr12	27345226	27345347
Jr01_28450_p1	Chr01	39063983	39064162	Jr12_19110_p1	Chr12	27357576	27357846
Jr01_28530_p1	Chr01	39192602	39192727	Jr12_19150_p1	Chr12	27380058	27380222
Jr01_28560_p1	Chr01	39210334	39211507	Jr12_19190_p1	Chr12	27400382	27401546
Jr01_28590_p1	Chr01	39243559	39243745	Jr12_19220_p1	Chr12	27427583	27427641
Jr01_28710_p1	Chr01	39446649	39446819	Jr12_19320_p1	Chr12	27466939	27467274
Jr01_32300_p1	Chr01	43292312	43292557	Jr12_14480_p1	Chr12	23832105	23832401
Jr01_32410_p1	Chr01	43334829	43334913	Jr12_14470_p1	Chr12	23817118	23817338
Jr01_32440_p1	Chr01	43365440	43365703	Jr12_14430_p1	Chr12	23781757	23782428
Jr01_32510_p1	Chr01	43404499	43404877	Jr12_14340_p1	Chr12	23739953	23740283
Jr01_32580_p1	Chr01	43449455	43449585	Jr12_14290_p1	Chr12	23647411	23647574
Jr01_32660_p1	Chr01	43539694	43539826	Jr12_14210_p1	Chr12	23526580	23526694
Jr01_32670_p1	Chr01	43547119	43547220	Jr12_14190_p1	Chr12	23514968	23515349
Jr01_32720_p1	Chr01	43589307	43589599	Jr12_14150_p2	Chr12	23482990	23483223
Jr01_32780_p1	Chr01	43634994	43635091	Jr12_14080_p1	Chr12	23433051	23433843
Jr01_32790_p1	Chr01	43653046	43653314	Jr12_14040_p1	Chr12	23423375	23423719
Jr01_32870_p1	Chr01	43677446	43677543	Jr12_14020_p1	Chr12	23412489	23412551
Jr01_32960_p1	Chr01	43704729	43704778	Jr12_13980_p1	Chr12	23378412	23379055
Jr01_31730_p1	Chr01	42750150	42750764	Jr12_14860_p1	Chr12	24203123	24203818
Jr01_31740_p1	Chr01	42764508	42765056	Jr12_14840_p1	Chr12	24187772	24188341
Jr01_31810_p1	Chr01	42831346	42831533	Jr12_14740_p1	Chr12	24067465	24067644
Jr01_31820_p1	Chr01	42840504	42840755	Jr12_14730_p1	Chr12	24064177	24064319
Jr01_31870_p1	Chr01	42873960	42874125	Jr12_14720_p1	Chr12	24058287	24058495
Jr01_31900_p1	Chr01	42901756	42902799	Jr12_14680_p1	Chr12	24042293	24043360
Jr01_31930_p1	Chr01	42931832	42932254	Jr12_14650_p1	Chr12	24010251	24010910
Jr01_31980_p1	Chr01	42982365	42983990	Jr12_14600_p1	Chr12	23963516	23965066
Jr01_32000_p1	Chr01	42992687	42993016	Jr12_14570_p1	Chr12	23950771	23951260
Jr01_32020_p1	Chr01	43018186	43018744	Jr12_14560_p1	Chr12	23928091	23928223
Jr01_32150_p1	Chr01	43126916	43127010	Jr12_14490_p1	Chr12	23871894	23872029
Jr01_00070_p1	Chr01	42071	42689	Jr13_15340_p1	Chr13	11712459	11712621
Jr01_00080_p1	Chr01	46961	47109	Jr13_15430_p1	Chr13	11796903	11797436
Jr01_00090_p1	Chr01	59583	59733	Jr13_15440_p1	Chr13	11834182	11834398
Jr01_00150_p1	Chr01	107400	107510	Jr13_15510_p1	Chr13	11966666	11966861
Jr01_00250_p1	Chr01	166088	166346	Jr13_15640_p1	Chr13	12129716	12130660
Jr01_00270_p1	Chr01	207575	207832	Jr13_15660_p1	Chr13	12169442	12169693
Jr01_00280_p1	Chr01	212932	213189	Jr13_15670_p1	Chr13	12173861	12174140
Jr01_00290_p1	Chr01	217202	217382	Jr13_15680_p1	Chr13	12181455	12181635
Jr01_00370_p1	Chr01	272755	272898	Jr13_15770_p1	Chr13	12278566	12278726
Jr01_00380_p1	Chr01	281597	281964	Jr13_15840_p1	Chr13	12345121	12345457
Jr01_00430_p1	Chr01	323316	323783	Jr13_15880_p1	Chr13	12437015	12437334
Jr01_00450_p1	Chr01	342712	342955	Jr13_15920_p1	Chr13	12459210	12459560
Jr01_07870_p1	Chr01	5370678	5370926	Jr13_28760_p1	Chr13	37498949	37499008
Jr01_07890_p1	Chr01	5382455	5382628	Jr13_28770_p1	Chr13	37502349	37502457
Jr01_07940_p1	Chr01	5407076	5407642	Jr13_28880_p1	Chr13	37591631	37592188
Jr01_07980_p1	Chr01	5448632	5448669	Jr13_28950_p1	Chr13	37630067	37630324
Jr01_07990_p1	Chr01	5454116	5455474	Jr13_29020_p1	Chr13	37680361	37681716
Jr01_08060_p1	Chr01	5509325	5509714	Jr13_29030_p1	Chr13	37688185	37688684
Jr01_08100_p1	Chr01	5537767	5538080	Jr13_29050_p1	Chr13	37705082	37705292
Jr01_08130_p1	Chr01	5583957	5584469	Jr13_29090_p1	Chr13	37758925	37759054
Jr01_08150_p1	Chr01	5600997	5601436	Jr13_29120_p1	Chr13	37781856	37782103
Jr01_08180_p1	Chr01	5657666	5657872	Jr13_29250_p1	Chr13	37915174	37915297
Jr01_07510_p1	Chr01	5142748	5143049	Jr13_28090_p1	Chr13	36911184	36912059
Jr01_07550_p1	Chr01	5174448	5174634	Jr13_28180_p2	Chr13	37021563	37022274
Jr01_07590_p1	Chr01	5212966	5213026	Jr13_28220_p1	Chr13	37028389	37029498
Jr01_07640_p1	Chr01	5258931	5259723	Jr13_28270_p1	Chr13	37064978	37065773
Jr01_07730_p1	Chr01	5288646	5288788	Jr13_28290_p1	Chr13	37088413	37088494
Jr01_07780_p1	Chr01	5307978	5308660	Jr13_28400_p1	Chr13	37142141	37142432
Jr01_07790_p1	Chr01	5310977	5311836	Jr13_28440_p1	Chr13	37169268	37169391
Jr01_07820_p1	Chr01	5318648	5318838	Jr13_28460_p1	Chr13	37194060	37194262
Jr01_07850_p1	Chr01	5329738	5330043	Jr13_28550_p1	Chr13	37248381	37248704
Jr01_01000_p1	Chr01	800625	803081	Jr13_11860_p1	Chr13	8446936	8449440
Jr01_01120_p1	Chr01	874979	875188	Jr13_11880_p1	Chr13	8482615	8482882
Jr01_01200_p1	Chr01	954361	954610	Jr13_11950_p1	Chr13	8569858	8570009
Jr01_01220_p1	Chr01	965047	965227	Jr13_11990_p1	Chr13	8610237	8610654
Jr01_01280_p1	Chr01	990262	990305	Jr13_12030_p1	Chr13	8665072	8665192
Jr01_01320_p1	Chr01	999038	999194	Jr13_12040_p1	Chr13	8673008	8673180
Jr01_01340_p1	Chr01	1019237	1019614	Jr13_12050_p1	Chr13	8688779	8689162
Jr01_00520_p1	Chr01	383865	384115	Jr13_16110_p1	Chr13	12793925	12794199
Jr01_00560_p1	Chr01	398870	399051	Jr13_16120_p1	Chr13	12800310	12800558
Jr01_00580_p1	Chr01	407387	407619	Jr13_16200_p1	Chr13	12900577	12900905
Jr01_00600_p1	Chr01	419944	420217	Jr13_16220_p1	Chr13	12958213	12958320
Jr01_00660_p1	Chr01	464192	464401	Jr13_16250_p1	Chr13	13033497	13034441
Jr01_00700_p1	Chr01	501921	503426	Jr13_16300_p1	Chr13	13089207	13091057
Jr01_06610_p1	Chr01	4489011	4489283	Jr13_12600_p1	Chr13	9196779	9196866
Jr01_06700_p1	Chr01	4515593	4515642	Jr13_12470_p1	Chr13	9090099	9090526
Jr01_06780_p1	Chr01	4589928	4590099	Jr13_12340_p1	Chr13	8933831	8934150
Jr01_06800_p1	Chr01	4629867	4630291	Jr13_12330_p1	Chr13	8896741	8897348
Jr01_06810_p1	Chr01	4635310	4635698	Jr13_12290_p1	Chr13	8857199	8857376
Jr01_06850_p1	Chr01	4658094	4658864	Jr13_12250_p1	Chr13	8830808	8831622
Jr01_06870_p1	Chr01	4678638	4679044	Jr13_12180_p1	Chr13	8775049	8775855
Jr01_06890_p1	Chr01	4693291	4693299	Jr13_12150_p1	Chr13	8758364	8758437
Jr01_06920_p1	Chr01	4707866	4707911	Jr13_12120_p1	Chr13	8742698	8743035
Jr01_06950_p1	Chr01	4723248	4723410	Jr13_12060_p1	Chr13	8692628	8692737
Jr01_06610_p1	Chr01	4489011	4489283	Jr16_14010_p1	Chr16	21952558	21952689
Jr01_06700_p1	Chr01	4515593	4515642	Jr16_14130_p1	Chr16	22067861	22067987
Jr01_06800_p1	Chr01	4629867	4630291	Jr16_14160_p1	Chr16	22105795	22106480
Jr01_06810_p1	Chr01	4635310	4635698	Jr16_14290_p1	Chr16	22251504	22251576
Jr01_06850_p1	Chr01	4658094	4658864	Jr16_14300_p1	Chr16	22270637	22270703
Jr01_06870_p1	Chr01	4678638	4679044	Jr16_14380_p1	Chr16	22318855	22319655
Jr01_06890_p1	Chr01	4693291	4693299	Jr16_14390_p1	Chr16	22332590	22332934
Jr01_06920_p1	Chr01	4707866	4707911	Jr16_14410_p1	Chr16	22366269	22366344
Jr01_07510_p1	Chr01	5142748	5143049	Jr16_02340_p1	Chr16	2819570	2820409
Jr01_07550_p1	Chr01	5174448	5174634	Jr16_02290_p1	Chr16	2744089	2745221
Jr01_07630_p1	Chr01	5261369	5262158	Jr16_02270_p1	Chr16	2721543	2722631
Jr01_07780_p1	Chr01	5307978	5308660	Jr16_02250_p1	Chr16	2689819	2691292
Jr01_07820_p1	Chr01	5318648	5318838	Jr16_02160_p1	Chr16	2655753	2655968
Jr01_07850_p1	Chr01	5329738	5330043	Jr16_02110_p1	Chr16	2625613	2626284
Jr01_07870_p1	Chr01	5370678	5370926	Jr16_02030_p1	Chr16	2515295	2515342
Jr01_07890_p1	Chr01	5382455	5382628	Jr16_02020_p1	Chr16	2505792	2506376
Jr01_07940_p1	Chr01	5407076	5407642	Jr16_01960_p1	Chr16	2466303	2466390
Jr01_07980_p1	Chr01	5448632	5448669	Jr16_01930_p1	Chr16	2439432	2439530
Jr01_07990_p1	Chr01	5454116	5455474	Jr16_01900_p1	Chr16	2400086	2400361
Jr01_08100_p1	Chr01	5537767	5538080	Jr16_01840_p1	Chr16	2321903	2322068
Jr01_08130_p1	Chr01	5583957	5584469	Jr16_01770_p1	Chr16	2145577	2145688
Jr01_08150_p1	Chr01	5600997	5601436	Jr16_01760_p1	Chr16	2120050	2120157
Jr01_00070_p1	Chr01	42071	42689	Jr16_12030_p1	Chr16	20110539	20110656
Jr01_00090_p1	Chr01	59583	59733	Jr16_11930_p1	Chr16	20049346	20049798
Jr01_00150_p1	Chr01	107400	107510	Jr16_11880_p1	Chr16	19989851	19990222
Jr01_00190_p1	Chr01	113316	113636	Jr16_11870_p1	Chr16	19984730	19986514
Jr01_00200_p1	Chr01	116313	116586	Jr16_11850_p1	Chr16	19974048	19974563
Jr01_00250_p1	Chr01	166088	166346	Jr16_11790_p1	Chr16	19927123	19927285
Jr01_00270_p1	Chr01	207575	207832	Jr16_11780_p1	Chr16	19915837	19916006
Jr01_00280_p1	Chr01	212932	213189	Jr16_11770_p1	Chr16	19909626	19909781
Jr01_00290_p1	Chr01	217202	217382	Jr16_11700_p1	Chr16	19866030	19866216
Jr01_03110_p1	Chr01	2240253	2240708	Jr16_12450_p1	Chr16	20456058	20456245
Jr01_03150_p1	Chr01	2257500	2257520	Jr16_12390_p1	Chr16	20419764	20420258
Jr01_03230_p1	Chr01	2312725	2313930	Jr16_12350_p1	Chr16	20395278	20396489
Jr01_03270_p1	Chr01	2492945	2493225	Jr16_12340_p1	Chr16	20391235	20391514
Jr01_03340_p1	Chr01	2505954	2506219	Jr16_12290_p1	Chr16	20357655	20357847
Jr01_03400_p1	Chr01	2538452	2538598	Jr16_12270_p1	Chr16	20343871	20344033
Jr01_03410_p1	Chr01	2548917	2549016	Jr16_12190_p1	Chr16	20291520	20291652
Jr01_03420_p1	Chr01	2548917	2549016	Jr16_12220_p1	Chr16	20290717	20290771
Jr01_03460_p1	Chr01	2582318	2582348	Jr16_12150_p1	Chr16	20220588	20221482
Jr02_21680_p1	Chr02	34146181	34146471	Jr03_07190_p1	Chr03	5362110	5362185
Jr02_21710_p1	Chr02	34154057	34154480	Jr03_07220_p1	Chr03	5386628	5386888
Jr02_21740_p1	Chr02	34171872	34172012	Jr03_07300_p1	Chr03	5428502	5428634
Jr02_21770_p1	Chr02	34191341	34191397	Jr03_07330_p1	Chr03	5458223	5461114
Jr02_21790_p1	Chr02	34199542	34199766	Jr03_07340_p1	Chr03	5466012	5467463
Jr02_21820_p1	Chr02	34219347	34219593	Jr03_07360_p1	Chr03	5503697	5503985
Jr02_22820_p1	Chr02	34951307	34951473	Jr04_06730_p1	Chr04	13821859	13821980
Jr02_22830_p1	Chr02	34955887	34956222	Jr04_06750_p2	Chr04	13891574	13891942
Jr02_22860_p1	Chr02	34983552	34984419	Jr04_06790_p1	Chr04	14029558	14030386
Jr02_22950_p1	Chr02	35045919	35046250	Jr04_06920_p1	Chr04	14650679	14651012
Jr02_23000_p1	Chr02	35053993	35054352	Jr04_06930_p1	Chr04	14692120	14692461
Jr02_23070_p1	Chr02	35091609	35092878	Jr04_07070_p1	Chr04	15294256	15294567
Jr02_23100_p1	Chr02	35112951	35113259	Jr04_07090_p1	Chr04	15352638	15352946
Jr02_23130_p1	Chr02	35148186	35148487	Jr04_07120_p1	Chr04	15412742	15413058
Jr02_23170_p1	Chr02	35200885	35201146	Jr04_07140_p1	Chr04	15446449	15446504
Jr02_25940_p1	Chr02	37132220	37132332	Jr04_12640_p1	Chr04	25588033	25588233
Jr02_25980_p1	Chr02	37158221	37158468	Jr04_12600_p1	Chr04	25567816	25567985
Jr02_26040_p1	Chr02	37224908	37224956	Jr04_12480_p1	Chr04	25507193	25507738
Jr02_26050_p1	Chr02	37246885	37247134	Jr04_12430_p1	Chr04	25493705	25493783
Jr02_26080_p1	Chr02	37256480	37256534	Jr04_12420_p1	Chr04	25489242	25489515
Jr02_26100_p1	Chr02	37263149	37263421	Jr04_12400_p1	Chr04	25466743	25467272
Jr02_26210_p1	Chr02	37324895	37325187	Jr04_12380_p1	Chr04	25441455	25441497
Jr02_26240_p1	Chr02	37348278	37348512	Jr04_12320_p1	Chr04	25404951	25405074
Jr02_24140_p1	Chr02	36013206	36013567	Jr04_14250_p1	Chr04	27750825	27751202
Jr02_24220_p1	Chr02	36024353	36025528	Jr04_14230_p1	Chr04	27741222	27741501
Jr02_24240_p1	Chr02	36040605	36040997	Jr04_14180_p1	Chr04	27729414	27730583
Jr02_24250_p1	Chr02	36043142	36043261	Jr04_14150_p1	Chr04	27695860	27696276
Jr02_24350_p1	Chr02	36091069	36091610	Jr04_14110_p1	Chr04	27663798	27663998
Jr02_24430_p1	Chr02	36130483	36130611	Jr04_14030_p1	Chr04	27607906	27608028
Jr02_24520_p1	Chr02	36236675	36236986	Jr04_14010_p1	Chr04	27564670	27564895
Jr02_19250_p1	Chr02	32196518	32196666	Jr07_33120_p1	Chr07	47946413	47946573
Jr02_19270_p1	Chr02	32200197	32201111	Jr07_33140_p1	Chr07	47952378	47953304
Jr02_19300_p1	Chr02	32259689	32260008	Jr07_33260_p1	Chr07	48037411	48037465
Jr02_19310_p1	Chr02	32274146	32274377	Jr07_33290_p1	Chr07	48067858	48067929
Jr02_19450_p1	Chr02	32369420	32369492	Jr07_33370_p1	Chr07	48117932	48117955
Jr02_19470_p1	Chr02	32391738	32392125	Jr07_33390_p1	Chr07	48139373	48139909
Jr02_19480_p1	Chr02	32394467	32394622	Jr07_33420_p1	Chr07	48149682	48149741
Jr02_19500_p1	Chr02	32406804	32407233	Jr07_33430_p1	Chr07	48163038	48163355
Jr02_19550_p1	Chr02	32443519	32443766	Jr07_33480_p1	Chr07	48179678	48180976
Jr02_16140_p1	Chr02	29386130	29386379	Jr07_08630_p1	Chr07	10607560	10607840
Jr02_16260_p1	Chr02	29507664	29508139	Jr07_08600_p1	Chr07	10582193	10582901
Jr02_16360_p1	Chr02	29601593	29601811	Jr07_08470_p1	Chr07	10313904	10314246
Jr02_16420_p1	Chr02	29672099	29672723	Jr07_08410_p1	Chr07	10169096	10169403
Jr02_16480_p1	Chr02	29723223	29723451	Jr07_08370_p1	Chr07	10117472	10118257
Jr02_16520_p1	Chr02	29741182	29741265	Jr07_08290_p1	Chr07	9868015	9868169
Jr02_16600_p1	Chr02	29828442	29829416	Jr07_08160_p1	Chr07	9684128	9685129
Jr02_16620_p1	Chr02	29853343	29853475	Jr07_08140_p1	Chr07	9669893	9670114
Jr02_16640_p1	Chr02	29870176	29870286	Jr07_08110_p1	Chr07	9524214	9524407
Jr02_16740_p1	Chr02	29946816	29947697	Jr07_08060_p1	Chr07	9477722	9477895
Jr02_16750_p1	Chr02	29965984	29966794	Jr07_08030_p1	Chr07	9454386	9454787
Jr02_16810_p1	Chr02	30028096	30028482	Jr07_08020_p1	Chr07	9360322	9361749
Jr02_17560_p1	Chr02	30738124	30738296	Jr07_07000_p1	Chr07	7966942	7967344
Jr02_17580_p1	Chr02	30746348	30747289	Jr07_06950_p1	Chr07	7936033	7936659
Jr02_17600_p1	Chr02	30753842	30753972	Jr07_06930_p1	Chr07	7902041	7902084
Jr02_17700_p1	Chr02	30804628	30806277	Jr07_06840_p1	Chr07	7799856	7800118
Jr02_17760_p1	Chr02	30877009	30877336	Jr07_06810_p1	Chr07	7765019	7765221
Jr02_17770_p1	Chr02	30890092	30890310	Jr07_06790_p1	Chr07	7687314	7687531
Jr02_18310_p1	Chr02	31372849	31374572	Jr09_11420_p1	Chr09	20308456	20308721
Jr02_18340_p1	Chr02	31383149	31383934	Jr09_11430_p1	Chr09	20310333	20310383
Jr02_18350_p1	Chr02	31392645	31392729	Jr09_11490_p1	Chr09	20345302	20345489
Jr02_18420_p1	Chr02	31467384	31467952	Jr09_11510_p1	Chr09	20357257	20357532
Jr02_18450_p1	Chr02	31483231	31483517	Jr09_11520_p1	Chr09	20360413	20360618
Jr02_18460_p1	Chr02	31490694	31491062	Jr09_11530_p1	Chr09	20367970	20368213
Jr02_18470_p1	Chr02	31498573	31498703	Jr09_11540_p1	Chr09	20372622	20373161
Jr02_18540_p1	Chr02	31575061	31575361	Jr09_11550_p1	Chr09	20390867	20391030
Jr02_18550_p1	Chr02	31579054	31581111	Jr09_11560_p1	Chr09	20394517	20396577
Jr02_18560_p1	Chr02	31591377	31591614	Jr09_11590_p1	Chr09	20402010	20402051
Jr02_18580_p1	Chr02	31605821	31606197	Jr09_11630_p1	Chr09	20426299	20426439
Jr02_18590_p1	Chr02	31611653	31613278	Jr09_11650_p1	Chr09	20448130	20449758
Jr02_18600_p1	Chr02	31622496	31622600	Jr09_11660_p1	Chr09	20456163	20456261
Jr02_18640_p1	Chr02	31675645	31676181	Jr09_11670_p1	Chr09	20462383	20463108
Jr02_18660_p1	Chr02	31718296	31718873	Jr09_11690_p1	Chr09	20476229	20476845
Jr02_18690_p1	Chr02	31741015	31741146	Jr09_11700_p1	Chr09	20488996	20489130
Jr02_18700_p1	Chr02	31767077	31767315	Jr09_11740_p1	Chr09	20526883	20527121
Jr02_18730_p1	Chr02	31773515	31773581	Jr09_11750_p1	Chr09	20537784	20537934
Jr02_18740_p1	Chr02	31790423	31790787	Jr09_11780_p1	Chr09	20576060	20576153
Jr02_18820_p1	Chr02	31876066	31876577	Jr09_11810_p1	Chr09	20586533	20586838
Jr02_18840_p1	Chr02	31896220	31896493	Jr09_11830_p1	Chr09	20600374	20600400
Jr02_18870_p1	Chr02	31948714	31948824	Jr09_11840_p1	Chr09	20611497	20611616
Jr02_18880_p1	Chr02	31956790	31957077	Jr09_11860_p1	Chr09	20614217	20614322
Jr02_18890_p1	Chr02	31961423	31961953	Jr09_11870_p1	Chr09	20624232	20624762
Jr02_18900_p1	Chr02	31966233	31966284	Jr09_11880_p1	Chr09	20627672	20628619
Jr02_18930_p1	Chr02	31979851	31980040	Jr09_11900_p1	Chr09	20639401	20639635
Jr02_18990_p1	Chr02	32018657	32018712	Jr09_11960_p1	Chr09	20670182	20670234
Jr02_19050_p1	Chr02	32057474	32058103	Jr09_11970_p1	Chr09	20679971	20680107
Jr02_19130_p1	Chr02	32091436	32091585	Jr09_12030_p1	Chr09	20722297	20722465
Jr02_19150_p1	Chr02	32100552	32100753	Jr09_12070_p1	Chr09	20738595	20738748
Jr02_19240_p1	Chr02	32145103	32145209	Jr09_12100_p1	Chr09	20758164	20758267
Jr02_19250_p1	Chr02	32196518	32196666	Jr09_12120_p1	Chr09	20787699	20787859
Jr02_19270_p1	Chr02	32200197	32201111	Jr09_12130_p1	Chr09	20792410	20792862
Jr02_19290_p1	Chr02	32244965	32245327	Jr09_12150_p1	Chr09	20833267	20833677
Jr02_19300_p1	Chr02	32259689	32260008	Jr09_12160_p1	Chr09	20852734	20852922
Jr02_19320_p1	Chr02	32278105	32278489	Jr09_12180_p1	Chr09	20863670	20864051
Jr02_19340_p1	Chr02	32310055	32310135	Jr09_12210_p1	Chr09	20880761	20881061
Jr02_19400_p1	Chr02	32337056	32339386	Jr09_12220_p1	Chr09	20889485	20891836
Jr02_19450_p1	Chr02	32369420	32369492	Jr09_12230_p1	Chr09	20921078	20921234
Jr02_19460_p1	Chr02	32382613	32382779	Jr09_12250_p1	Chr09	20926639	20926725
Jr02_19480_p1	Chr02	32394467	32394622	Jr09_12310_p1	Chr09	20942015	20942269
Jr02_19490_p1	Chr02	32402507	32402801	Jr09_12320_p1	Chr09	20947461	20947720
Jr02_19500_p1	Chr02	32406804	32407233	Jr09_12340_p1	Chr09	20954656	20954745
Jr02_19510_p1	Chr02	32429209	32429347	Jr09_12360_p1	Chr09	20965638	20965832
Jr02_19570_p1	Chr02	32466623	32466715	Jr09_12410_p1	Chr09	20979573	20979678
Jr02_19700_p1	Chr02	32598082	32598193	Jr09_12420_p1	Chr09	20981270	20981809
Jr02_19710_p1	Chr02	32615736	32615998	Jr09_12430_p1	Chr09	20992883	20993145
Jr02_19720_p1	Chr02	32629803	32630059	Jr09_12440_p1	Chr09	21003653	21003845
Jr02_19750_p1	Chr02	32656070	32656299	Jr09_12480_p1	Chr09	21029377	21029988
Jr02_19760_p1	Chr02	32663871	32664103	Jr09_12490_p1	Chr09	21042450	21042692
Jr02_19780_p1	Chr02	32721825	32722424	Jr09_12510_p1	Chr09	21055082	21055810
Jr02_19790_p1	Chr02	32745835	32746206	Jr09_12550_p1	Chr09	21073744	21073836
Jr02_19800_p1	Chr02	32756986	32757122	Jr09_12570_p1	Chr09	21083806	21083950
Jr02_19810_p1	Chr02	32768740	32769060	Jr09_12580_p1	Chr09	21091099	21091335
Jr02_19830_p1	Chr02	32786665	32786740	Jr09_12590_p1	Chr09	21102728	21102825
Jr02_19850_p1	Chr02	32809284	32809457	Jr09_12600_p1	Chr09	21121794	21121992
Jr02_19870_p1	Chr02	32816474	32816809	Jr09_12610_p1	Chr09	21128805	21128998
Jr02_19880_p1	Chr02	32837684	32838990	Jr09_12650_p1	Chr09	21151014	21152359
Jr02_19900_p1	Chr02	32871937	32871990	Jr09_12660_p1	Chr09	21179008	21179061
Jr02_19920_p1	Chr02	32890438	32890617	Jr09_12670_p1	Chr09	21181155	21181319
Jr02_19950_p1	Chr02	32929045	32929077	Jr09_12690_p1	Chr09	21219489	21219521
Jr02_19960_p1	Chr02	32937611	32937728	Jr09_12700_p1	Chr09	21226812	21226929
Jr02_19970_p1	Chr02	32961865	32962103	Jr09_12710_p1	Chr09	21236019	21236098
Jr02_20010_p1	Chr02	32983668	32983741	Jr09_12730_p1	Chr09	21256634	21257242
Jr02_20040_p1	Chr02	32998759	32998798	Jr09_12750_p2	Chr09	21271994	21272167
Jr02_20060_p1	Chr02	33031523	33033772	Jr09_12770_p1	Chr09	21280644	21282902
Jr02_20120_p1	Chr02	33052558	33052965	Jr09_12810_p1	Chr09	21300335	21300757
Jr02_20130_p1	Chr02	33057591	33057908	Jr09_12850_p1	Chr09	21316591	21316717
Jr02_20140_p1	Chr02	33069292	33070737	Jr09_12880_p1	Chr09	21336636	21336717
Jr02_20270_p1	Chr02	33166339	33166411	Jr09_12900_p1	Chr09	21356509	21357132
Jr02_20300_p1	Chr02	33174963	33175964	Jr09_12910_p1	Chr09	21358725	21359777
Jr02_20310_p1	Chr02	33192327	33192478	Jr09_12920_p1	Chr09	21369403	21369541
Jr02_20320_p1	Chr02	33214797	33214841	Jr09_12970_p1	Chr09	21397675	21398176
Jr02_20350_p1	Chr02	33226764	33226965	Jr09_12980_p1	Chr09	21403057	21403224
Jr02_20370_p1	Chr02	33231652	33231658	Jr09_12990_p1	Chr09	21408467	21408473
Jr02_20420_p1	Chr02	33246008	33246132	Jr09_13020_p1	Chr09	21413619	21413916
Jr02_20440_p1	Chr02	33277923	33278050	Jr09_13030_p1	Chr09	21416514	21417032
Jr02_20480_p1	Chr02	33322367	33322851	Jr09_13060_p1	Chr09	21440337	21441092
Jr02_20510_p1	Chr02	33338682	33338807	Jr09_13070_p1	Chr09	21451826	21451983
Jr02_20540_p1	Chr02	33343634	33343735	Jr09_13090_p1	Chr09	21464465	21464579
Jr02_20560_p1	Chr02	33366200	33366238	Jr09_13130_p1	Chr09	21499158	21499219
Jr02_20550_p1	Chr02	33366935	33367330	Jr09_13220_p1	Chr09	21632418	21632618
Jr02_20580_p1	Chr02	33374383	33374834	Jr09_13240_p1	Chr09	21679850	21679876
Jr02_20570_p1	Chr02	33374628	33374740	Jr09_13200_p1	Chr09	21680716	21681016
Jr02_20620_p1	Chr02	33388088	33388245	Jr09_13340_p1	Chr09	21821315	21821467
Jr02_20630_p1	Chr02	33411778	33412180	Jr09_13360_p1	Chr09	21833533	21833973
Jr02_20660_p1	Chr02	33422614	33422969	Jr09_13370_p1	Chr09	21840485	21840667
Jr02_20680_p1	Chr02	33434141	33434194	Jr09_13380_p1	Chr09	21851220	21851335
Jr02_20710_p1	Chr02	33442700	33442996	Jr09_13400_p1	Chr09	21857057	21857341
Jr02_20720_p1	Chr02	33447226	33447559	Jr09_13410_p1	Chr09	21861919	21862158
Jr02_20750_p1	Chr02	33462180	33462243	Jr09_13430_p1	Chr09	21872707	21872788
Jr02_20780_p1	Chr02	33479686	33479964	Jr09_13440_p1	Chr09	21881852	21882121
Jr02_20850_p1	Chr02	33500121	33500272	Jr09_13450_p1	Chr09	21883380	21885179
Jr02_20900_p1	Chr02	33527290	33527850	Jr09_13460_p1	Chr09	21898256	21898834
Jr02_20910_p1	Chr02	33565460	33565746	Jr09_13490_p1	Chr09	21948898	21949262
Jr02_20930_p1	Chr02	33576364	33576664	Jr09_13510_p1	Chr09	21950971	21951193
Jr02_20960_p1	Chr02	33591177	33591214	Jr09_13520_p1	Chr09	21957986	21958247
Jr02_20970_p1	Chr02	33596868	33597805	Jr09_13550_p1	Chr09	21963906	21964843
Jr02_20980_p1	Chr02	33613899	33614073	Jr09_13570_p1	Chr09	21991781	21992121
Jr02_21010_p1	Chr02	33661199	33661591	Jr09_13590_p1	Chr09	22001965	22002360
Jr02_21120_p1	Chr02	33696019	33696283	Jr09_13620_p1	Chr09	22009963	22009989
Jr02_21160_p1	Chr02	33704648	33704836	Jr09_13640_p1	Chr09	22019187	22019227
Jr02_21200_p1	Chr02	33723537	33723920	Jr09_13650_p1	Chr09	22026247	22026803
Jr02_21250_p1	Chr02	33804336	33805610	Jr09_13660_p1	Chr09	22056531	22056910
Jr02_21260_p1	Chr02	33810797	33810871	Jr09_13670_p1	Chr09	22061987	22062062
Jr02_21270_p1	Chr02	33820198	33820506	Jr09_13680_p1	Chr09	22073021	22073314
Jr02_21310_p1	Chr02	33858459	33858632	Jr09_13690_p1	Chr09	22095116	22095283
Jr02_21330_p1	Chr02	33866248	33866659	Jr09_13700_p1	Chr09	22104914	22105125
Jr02_21360_p1	Chr02	33904874	33905254	Jr09_13710_p1	Chr09	22129415	22129795
Jr02_21370_p1	Chr02	33907481	33908064	Jr09_13730_p1	Chr09	22132798	22132917
Jr02_21380_p1	Chr02	33916108	33916346	Jr09_13740_p1	Chr09	22144124	22144181
Jr02_21420_p1	Chr02	33957275	33957467	Jr09_13760_p1	Chr09	22148873	22149662
Jr02_21430_p1	Chr02	33966711	33966984	Jr09_13830_p1	Chr09	22161126	22161160
Jr02_21460_p1	Chr02	33975144	33975290	Jr09_13840_p1	Chr09	22169174	22169475
Jr02_21470_p1	Chr02	33996830	33997069	Jr09_13870_p1	Chr09	22182645	22182821
Jr02_21490_p1	Chr02	34001817	34001998	Jr09_13880_p1	Chr09	22192104	22192353
Jr02_21500_p1	Chr02	34007850	34008097	Jr09_13890_p1	Chr09	22198114	22198265
Jr02_21550_p1	Chr02	34050400	34050942	Jr09_13920_p1	Chr09	22205977	22206342
Jr02_21620_p1	Chr02	34097178	34097813	Jr09_13930_p1	Chr09	22225314	22225925
Jr02_21710_p1	Chr02	34154057	34154480	Jr09_13950_p1	Chr09	22242207	22242341
Jr02_21720_p1	Chr02	34164027	34164128	Jr09_13960_p1	Chr09	22249127	22249290
Jr02_21760_p1	Chr02	34182147	34182761	Jr09_13970_p1	Chr09	22250210	22250785
Jr02_21770_p1	Chr02	34191341	34191397	Jr09_14000_p1	Chr09	22289154	22291988
Jr02_21790_p1	Chr02	34199542	34199766	Jr09_14020_p1	Chr09	22299730	22299841
Jr02_21810_p1	Chr02	34212856	34213603	Jr09_14040_p1	Chr09	22312590	22313024
Jr02_21820_p1	Chr02	34219347	34219593	Jr09_14050_p1	Chr09	22319557	22319803
Jr02_21840_p1	Chr02	34233597	34233803	Jr09_14060_p1	Chr09	22334563	22334769
Jr02_21870_p1	Chr02	34242353	34242453	Jr09_14080_p1	Chr09	22342543	22342658
Jr02_21880_p1	Chr02	34249466	34249599	Jr09_14090_p1	Chr09	22353708	22354281
Jr02_21930_p1	Chr02	34277632	34277818	Jr09_14120_p1	Chr09	22391888	22392074
Jr02_21940_p1	Chr02	34287411	34287576	Jr09_14130_p1	Chr09	22399590	22399824
Jr02_21950_p1	Chr02	34298824	34299052	Jr09_14170_p1	Chr09	22404566	22404721
Jr02_21990_p1	Chr02	34338192	34338363	Jr09_14180_p1	Chr09	22419926	22420122
Jr02_22010_p1	Chr02	34366991	34367278	Jr09_14190_p1	Chr09	22432106	22432238
Jr02_22060_p1	Chr02	34399012	34402167	Jr09_14210_p1	Chr09	22443022	22446180
Jr02_22080_p1	Chr02	34421440	34421727	Jr09_14220_p1	Chr09	22453902	22454001
Jr02_22100_p1	Chr02	34424294	34425028	Jr09_14230_p1	Chr09	22456358	22457011
Jr02_22110_p1	Chr02	34430291	34430621	Jr09_14240_p1	Chr09	22465158	22465199
Jr02_22120_p1	Chr02	34463149	34463401	Jr09_14260_p1	Chr09	22488710	22488749
Jr02_22250_p1	Chr02	34544593	34544718	Jr09_14270_p1	Chr09	22518001	22518105
Jr02_22320_p1	Chr02	34616975	34617799	Jr09_14340_p1	Chr09	22547140	22547597
Jr02_22340_p1	Chr02	34622777	34622840	Jr09_14360_p1	Chr09	22550987	22551183
Jr02_22370_p1	Chr02	34637396	34639036	Jr09_14380_p1	Chr09	22563023	22564696
Jr02_22380_p1	Chr02	34649151	34649326	Jr09_14400_p1	Chr09	22576753	22576898
Jr02_22390_p1	Chr02	34655067	34655355	Jr09_14410_p1	Chr09	22588162	22588220
Jr02_22410_p1	Chr02	34670859	34670955	Jr09_14420_p1	Chr09	22600760	22600877
Jr02_22430_p1	Chr02	34694272	34694585	Jr09_14430_p1	Chr09	22614850	22615461
Jr02_22450_p1	Chr02	34723446	34723931	Jr09_14460_p1	Chr09	22637480	22637631
Jr02_22480_p1	Chr02	34752516	34753403	Jr09_14500_p1	Chr09	22652771	22653246
Jr02_22500_p1	Chr02	34779456	34782023	Jr09_14510_p1	Chr09	22666435	22668957
Jr02_22510_p1	Chr02	34784504	34784729	Jr09_14520_p1	Chr09	22671184	22671409
Jr02_22610_p1	Chr02	34837484	34837862	Jr09_14550_p1	Chr09	22699264	22699481
Jr02_22640_p1	Chr02	34842431	34842819	Jr09_14560_p1	Chr09	22705168	22705353
Jr02_22690_p1	Chr02	34876481	34876627	Jr09_14570_p1	Chr09	22724328	22724777
Jr02_22700_p1	Chr02	34882450	34882615	Jr09_14580_p1	Chr09	22727310	22727430
Jr02_22770_p1	Chr02	34917464	34917598	Jr09_14590_p1	Chr09	22733392	22733523
Jr02_22780_p1	Chr02	34940192	34940466	Jr09_14600_p1	Chr09	22746595	22746760
Jr02_22800_p1	Chr02	34942576	34942713	Jr09_14610_p1	Chr09	22748934	22749071
Jr02_22820_p1	Chr02	34951307	34951473	Jr09_14640_p1	Chr09	22756689	22756962
Jr02_22860_p1	Chr02	34983552	34984419	Jr09_14650_p1	Chr09	22767098	22767890
Jr02_22950_p1	Chr02	35045919	35046250	Jr09_14660_p1	Chr09	22783845	22783936
Jr02_23000_p1	Chr02	35053993	35054352	Jr09_14670_p1	Chr09	22786902	22787008
Jr02_23020_p1	Chr02	35073182	35073481	Jr09_14680_p1	Chr09	22796947	22797249
Jr02_23120_p1	Chr02	35134854	35135061	Jr09_14690_p1	Chr09	22810986	22811241
Jr02_23130_p1	Chr02	35148186	35148487	Jr09_14700_p1	Chr09	22818179	22818480
Jr02_23160_p1	Chr02	35180847	35181114	Jr09_14730_p1	Chr09	22839858	22840444
Jr02_23170_p1	Chr02	35200885	35201146	Jr09_14740_p1	Chr09	22854766	22854969
Jr02_23180_p1	Chr02	35207654	35207729	Jr09_14770_p1	Chr09	22882866	22882941
Jr02_23200_p1	Chr02	35213030	35213146	Jr09_14790_p1	Chr09	22891277	22891393
Jr02_23240_p1	Chr02	35277704	35277768	Jr09_14810_p1	Chr09	22898244	22898372
Jr02_23380_p1	Chr02	35501373	35502069	Jr09_14830_p1	Chr09	22922683	22922952
Jr02_23390_p1	Chr02	35509616	35510012	Jr09_14840_p1	Chr09	22932088	22932465
Jr02_23410_p1	Chr02	35526947	35527013	Jr09_14850_p1	Chr09	22937234	22937529
Jr02_23420_p1	Chr02	35545345	35545524	Jr09_14870_p1	Chr09	22958761	22958823
Jr02_23440_p1	Chr02	35550799	35550993	Jr09_14890_p1	Chr09	22963225	22963483
Jr02_23460_p1	Chr02	35555875	35556085	Jr09_14900_p1	Chr09	22968119	22968332
Jr02_23470_p1	Chr02	35561359	35564334	Jr09_14910_p1	Chr09	22970409	22973384
Jr02_23480_p1	Chr02	35574457	35575128	Jr09_14920_p1	Chr09	22980388	22980585
Jr02_23550_p1	Chr02	35649989	35650082	Jr09_14930_p1	Chr09	22992027	22992396
Jr02_23610_p1	Chr02	35684708	35684888	Jr09_14940_p1	Chr09	23008965	23009031
Jr02_23620_p1	Chr02	35688567	35688819	Jr09_14970_p1	Chr09	23024448	23024640
Jr02_23640_p1	Chr02	35711104	35711609	Jr09_14990_p1	Chr09	23030615	23030885
Jr02_23670_p1	Chr02	35718759	35719286	Jr09_15010_p1	Chr09	23047172	23048017
Jr02_23690_p1	Chr02	35742543	35742744	Jr09_15030_p1	Chr09	23070433	23070933
Jr02_23710_p1	Chr02	35748152	35748658	Jr09_15040_p1	Chr09	23076421	23076655
Jr02_23740_p1	Chr02	35775570	35775914	Jr09_15050_p1	Chr09	23079855	23080223
Jr02_23840_p1	Chr02	35820973	35821224	Jr09_15080_p1	Chr09	23100113	23100451
Jr02_23850_p1	Chr02	35826921	35826990	Jr09_15090_p1	Chr09	23107218	23107472
Jr02_23980_p1	Chr02	35913547	35913854	Jr09_15100_p1	Chr09	23107218	23107408
Jr02_23990_p1	Chr02	35922899	35923096	Jr09_15110_p1	Chr09	23113809	23114006
Jr02_24010_p1	Chr02	35944934	35945070	Jr09_15120_p1	Chr09	23124382	23124515
Jr02_24040_p1	Chr02	35964102	35964228	Jr09_15140_p1	Chr09	23129677	23129930
Jr02_24050_p1	Chr02	35965803	35967776	Jr09_15150_p1	Chr09	23131064	23133568
Jr02_24070_p1	Chr02	35981790	35982124	Jr09_15200_p1	Chr09	23165749	23165964
Jr02_24140_p1	Chr02	36013206	36013567	Jr09_15230_p1	Chr09	23183553	23183887
Jr02_24230_p1	Chr02	36032574	36032891	Jr09_15250_p1	Chr09	23195175	23195495
Jr02_24250_p1	Chr02	36043142	36043261	Jr09_15290_p1	Chr09	23206310	23206873
Jr02_24260_p1	Chr02	36058950	36059438	Jr09_15300_p1	Chr09	23223178	23224743
Jr02_24280_p1	Chr02	36062987	36063051	Jr09_15310_p1	Chr09	23227786	23227908
Jr02_24320_p1	Chr02	36068926	36069115	Jr09_15320_p1	Chr09	23232848	23233163
Jr02_24330_p1	Chr02	36076553	36076721	Jr09_15330_p1	Chr09	23237720	23237885
Jr02_24350_p1	Chr02	36091069	36091610	Jr09_15350_p1	Chr09	23244554	23244581
Jr02_24370_p1	Chr02	36099760	36099894	Jr09_15360_p1	Chr09	23251239	23251333
Jr02_24440_p1	Chr02	36134187	36134359	Jr09_15370_p1	Chr09	23261733	23262324
Jr02_24480_p1	Chr02	36152141	36152463	Jr09_15390_p1	Chr09	23267130	23267924
Jr02_24490_p1	Chr02	36184126	36184496	Jr09_15420_p1	Chr09	23330607	23330755
Jr02_24510_p1	Chr02	36186657	36186851	Jr09_15430_p1	Chr09	23332756	23332928
Jr02_24520_p1	Chr02	36236675	36236986	Jr09_15440_p2	Chr09	23339819	23340141
Jr02_24530_p1	Chr02	36241077	36241448	Jr09_15460_p1	Chr09	23342487	23342876
Jr02_24540_p1	Chr02	36251222	36251659	Jr09_15480_p1	Chr09	23352336	23352740
Jr02_24650_p1	Chr02	36348742	36350109	Jr09_15560_p1	Chr09	23390315	23391718
Jr02_24790_p1	Chr02	36418286	36418396	Jr09_15600_p1	Chr09	23425047	23425330
Jr02_24830_p1	Chr02	36446559	36446788	Jr09_15640_p1	Chr09	23431262	23431476
Jr02_24840_p1	Chr02	36462951	36463250	Jr09_15660_p1	Chr09	23445034	23445300
Jr02_24890_p1	Chr02	36487715	36487883	Jr09_15680_p1	Chr09	23460988	23461264
Jr02_24900_p1	Chr02	36495387	36495642	Jr09_15690_p1	Chr09	23466340	23466374
Jr02_24910_p1	Chr02	36503020	36503262	Jr09_15710_p1	Chr09	23502100	23502451
Jr02_25010_p1	Chr02	36536084	36536275	Jr09_15740_p1	Chr09	23523988	23524347
Jr02_25020_p1	Chr02	36555411	36555598	Jr09_15780_p1	Chr09	23535768	23536130
Jr02_25050_p1	Chr02	36568023	36568133	Jr09_15790_p1	Chr09	23544195	23544305
Jr02_25110_p1	Chr02	36614297	36614557	Jr09_15820_p1	Chr09	23576022	23576085
Jr02_25140_p1	Chr02	36635132	36635164	Jr09_15830_p1	Chr09	23591545	23591768
Jr02_25150_p1	Chr02	36652776	36653840	Jr09_15840_p1	Chr09	23592809	23593933
Jr02_25160_p1	Chr02	36679185	36679594	Jr09_15850_p1	Chr09	23621878	23622287
Jr02_15160_p1	Chr02	28321079	28322542	Jr09_09240_p1	Chr09	18522398	18522601
Jr02_15190_p1	Chr02	28429502	28429798	Jr09_09260_p1	Chr09	18551016	18551381
Jr02_15200_p1	Chr02	28432270	28432502	Jr09_09270_p1	Chr09	18555050	18555229
Jr02_15210_p1	Chr02	28448800	28449423	Jr09_09280_p1	Chr09	18568131	18568468
Jr02_15280_p1	Chr02	28519401	28519696	Jr09_09290_p1	Chr09	18606245	18607523
Jr02_15290_p1	Chr02	28535336	28535579	Jr09_09300_p1	Chr09	18617630	18617775
Jr02_15320_p1	Chr02	28592096	28592445	Jr09_09310_p1	Chr09	18630870	18631685
Jr02_15330_p1	Chr02	28605411	28605479	Jr09_09340_p1	Chr09	18641248	18641286
Jr02_15370_p1	Chr02	28612554	28612818	Jr09_09400_p1	Chr09	18663790	18663999
Jr02_15390_p1	Chr02	28619164	28619555	Jr09_09410_p1	Chr09	18665640	18666031
Jr02_15430_p1	Chr02	28646954	28646991	Jr09_09430_p1	Chr09	18678289	18678722
Jr02_15440_p1	Chr02	28658360	28659178	Jr09_09440_p1	Chr09	18685381	18685548
Jr02_15460_p1	Chr02	28685090	28685441	Jr09_09450_p1	Chr09	18690429	18690771
Jr02_15470_p1	Chr02	28701591	28701700	Jr09_09460_p1	Chr09	18698789	18698898
Jr02_15500_p1	Chr02	28751693	28751716	Jr09_09480_p1	Chr09	18733789	18733925
Jr02_15510_p1	Chr02	28787403	28787989	Jr09_09490_p1	Chr09	18756289	18756864
Jr02_15520_p1	Chr02	28795410	28796131	Jr09_09500_p1	Chr09	18760176	18760870
Jr02_15540_p1	Chr02	28809685	28809808	Jr09_09510_p1	Chr09	18767066	18767293
Jr02_15550_p1	Chr02	28821271	28821992	Jr09_09520_p1	Chr09	18777005	18777723
Jr02_15600_p1	Chr02	28877669	28878239	Jr09_09530_p1	Chr09	18795723	18796423
Jr02_15610_p1	Chr02	28888288	28888642	Jr09_09540_p1	Chr09	18800347	18801132
Jr02_15620_p1	Chr02	28901609	28901888	Jr09_09550_p1	Chr09	18810091	18810333
Jr02_15640_p1	Chr02	28934604	28935186	Jr09_09560_p1	Chr09	18812318	18812527
Jr02_15650_p1	Chr02	28941494	28941809	Jr09_09590_p1	Chr09	18817838	18817874
Jr02_15740_p1	Chr02	29016119	29016320	Jr09_09600_p1	Chr09	18827755	18827886
Jr02_15760_p1	Chr02	29026062	29026407	Jr09_09610_p1	Chr09	18838978	18839431
Jr02_15780_p1	Chr02	29153017	29153628	Jr09_09620_p1	Chr09	18843264	18843872
Jr02_15940_p1	Chr02	29236767	29236818	Jr09_09630_p1	Chr09	18852337	18852385
Jr02_15970_p1	Chr02	29258946	29259108	Jr09_09640_p1	Chr09	18870434	18870575
Jr02_15990_p1	Chr02	29275190	29275506	Jr09_09650_p1	Chr09	18875490	18875822
Jr02_16000_p1	Chr02	29293352	29293963	Jr09_09660_p1	Chr09	18879122	18879736
Jr02_16040_p1	Chr02	29316504	29316754	Jr09_09680_p1	Chr09	18893459	18893923
Jr02_16100_p1	Chr02	29356354	29356725	Jr09_09770_p1	Chr09	18933265	18933642
Jr02_16140_p1	Chr02	29386130	29386379	Jr09_09790_p1	Chr09	18944690	18944924
Jr02_16150_p1	Chr02	29396745	29396831	Jr09_09800_p1	Chr09	18952875	18953091
Jr02_16200_p1	Chr02	29434900	29435118	Jr09_09810_p1	Chr09	18962480	18962640
Jr02_16220_p1	Chr02	29439643	29439868	Jr09_09840_p1	Chr09	18967335	18967535
Jr02_16240_p1	Chr02	29480152	29480490	Jr09_09850_p1	Chr09	19005232	19005567
Jr02_16260_p1	Chr02	29507664	29508139	Jr09_09860_p1	Chr09	19019946	19020647
Jr02_16270_p1	Chr02	29537295	29537538	Jr09_09880_p1	Chr09	19037982	19038327
Jr02_16290_p1	Chr02	29549552	29549784	Jr09_09890_p1	Chr09	19048258	19048464
Jr02_16300_p1	Chr02	29554591	29554743	Jr09_09930_p1	Chr09	19077336	19077539
Jr02_16320_p1	Chr02	29585264	29586193	Jr09_09950_p1	Chr09	19108736	19109674
Jr02_16360_p1	Chr02	29601593	29601811	Jr09_09960_p1	Chr09	19117678	19118182
Jr02_16370_p1	Chr02	29609479	29609597	Jr09_09970_p1	Chr09	19127174	19128361
Jr02_16420_p1	Chr02	29672099	29672723	Jr09_09980_p1	Chr09	19148726	19148857
Jr02_16490_p1	Chr02	29730516	29730630	Jr09_10060_p1	Chr09	19220514	19222705
Jr02_16530_p1	Chr02	29748104	29748197	Jr09_10070_p1	Chr09	19232620	19232759
Jr02_16560_p1	Chr02	29786229	29786420	Jr09_10080_p1	Chr09	19249843	19250034
Jr02_16590_p1	Chr02	29806091	29806234	Jr09_10090_p1	Chr09	19254317	19254650
Jr02_16600_p1	Chr02	29828442	29829416	Jr09_10110_p1	Chr09	19277722	19278702
Jr02_16620_p1	Chr02	29853343	29853475	Jr09_10120_p1	Chr09	19293272	19293381
Jr02_16630_p1	Chr02	29861703	29862129	Jr09_10130_p1	Chr09	19298375	19299611
Jr02_16640_p1	Chr02	29870176	29870286	Jr09_10140_p1	Chr09	19306656	19306665
Jr02_16670_p1	Chr02	29892858	29893114	Jr09_10180_p1	Chr09	19312248	19312514
Jr02_16680_p1	Chr02	29905260	29905694	Jr09_10190_p1	Chr09	19325971	19326333
Jr02_16730_p1	Chr02	29945047	29945258	Jr09_10200_p1	Chr09	19328924	19329193
Jr02_16750_p1	Chr02	29965984	29966794	Jr09_10230_p1	Chr09	19367719	19368532
Jr02_16820_p1	Chr02	30045010	30046275	Jr09_10250_p1	Chr09	19411306	19412544
Jr02_16850_p1	Chr02	30072663	30073232	Jr09_10260_p1	Chr09	19426490	19427047
Jr02_16870_p1	Chr02	30099348	30099901	Jr09_10290_p1	Chr09	19459934	19460405
Jr02_16880_p1	Chr02	30105630	30105924	Jr09_10310_p1	Chr09	19468322	19468613
Jr02_16890_p1	Chr02	30149354	30149514	Jr09_10330_p1	Chr09	19479896	19479979
Jr02_16930_p1	Chr02	30168184	30168502	Jr09_10350_p1	Chr09	19508871	19509298
Jr02_16940_p1	Chr02	30189306	30189419	Jr09_10360_p1	Chr09	19537475	19537588
Jr02_16950_p1	Chr02	30193853	30194047	Jr09_10400_p1	Chr09	19543039	19543215
Jr02_17010_p1	Chr02	30257501	30258136	Jr09_10410_p1	Chr09	19548155	19548242
Jr02_17050_p1	Chr02	30292264	30292944	Jr09_10420_p1	Chr09	19559623	19559763
Jr02_17080_p1	Chr02	30334464	30335142	Jr09_10470_p1	Chr09	19589035	19589662
Jr02_17090_p1	Chr02	30357861	30358243	Jr09_10500_p1	Chr09	19618783	19618960
Jr02_17130_p1	Chr02	30419660	30420340	Jr09_10520_p1	Chr09	19641495	19642064
Jr02_17180_p1	Chr02	30435407	30435516	Jr09_10580_p1	Chr09	19665154	19665485
Jr02_17220_p1	Chr02	30460641	30460970	Jr09_10590_p1	Chr09	19683041	19683177
Jr02_17230_p1	Chr02	30473612	30473948	Jr09_10600_p1	Chr09	19688295	19689288
Jr02_17250_p1	Chr02	30486532	30486752	Jr09_10610_p1	Chr09	19706296	19706549
Jr02_17260_p1	Chr02	30506653	30506814	Jr09_10650_p1	Chr09	19736564	19736710
Jr02_17270_p1	Chr02	30517810	30518500	Jr09_10660_p1	Chr09	19758253	19758624
Jr02_17290_p1	Chr02	30537247	30537519	Jr09_10660_p2	Chr09	19758331	19758624
Jr02_17300_p1	Chr02	30555247	30555419	Jr09_10670_p1	Chr09	19764233	19764620
Jr02_17340_p1	Chr02	30568931	30569036	Jr09_10680_p1	Chr09	19768485	19768727
Jr02_17400_p1	Chr02	30606753	30607010	Jr09_10690_p1	Chr09	19784492	19784528
Jr02_17420_p1	Chr02	30628743	30629666	Jr09_10700_p1	Chr09	19794717	19795643
Jr02_17440_p1	Chr02	30648067	30649056	Jr09_10730_p1	Chr09	19816986	19817978
Jr02_17460_p1	Chr02	30680353	30680486	Jr09_10740_p1	Chr09	19839029	19839282
Jr02_17470_p1	Chr02	30682376	30682468	Jr09_10750_p1	Chr09	19842246	19842341
Jr02_17490_p1	Chr02	30708514	30708923	Jr09_10790_p1	Chr09	19872409	19872608
Jr02_17530_p1	Chr02	30725647	30725859	Jr09_10800_p1	Chr09	19878597	19878849
Jr02_17560_p1	Chr02	30738124	30738296	Jr09_10810_p1	Chr09	19890364	19890614
Jr02_17580_p1	Chr02	30746348	30747289	Jr09_10820_p1	Chr09	19901815	19902678
Jr02_17600_p1	Chr02	30753842	30753972	Jr09_10840_p1	Chr09	19908900	19909030
Jr02_17680_p1	Chr02	30785597	30786033	Jr09_10850_p1	Chr09	19923470	19924732
Jr02_17690_p1	Chr02	30787289	30788680	Jr09_10860_p1	Chr09	19926419	19927816
Jr02_17700_p1	Chr02	30804628	30806277	Jr09_10870_p1	Chr09	19935914	19936192
Jr02_17760_p1	Chr02	30877009	30877336	Jr09_10890_p1	Chr09	19939853	19940180
Jr02_17770_p1	Chr02	30890092	30890310	Jr09_10900_p1	Chr09	19953311	19953365
Jr02_17800_p1	Chr02	30932302	30932638	Jr09_10920_p1	Chr09	19966948	19967053
Jr02_17810_p1	Chr02	30941251	30941369	Jr09_10930_p1	Chr09	19973380	19973486
Jr02_17830_p1	Chr02	30955359	30955682	Jr09_10940_p1	Chr09	19991493	19991598
Jr02_17850_p1	Chr02	30972055	30972116	Jr09_10960_p1	Chr09	20007709	20007770
Jr02_17880_p1	Chr02	30993462	30993517	Jr09_10990_p1	Chr09	20010856	20012751
Jr02_17890_p1	Chr02	31015208	31015606	Jr09_11010_p1	Chr09	20022901	20023335
Jr02_17900_p1	Chr02	31037405	31037646	Jr09_11050_p1	Chr09	20056121	20056327
Jr02_17910_p1	Chr02	31044691	31044772	Jr09_11060_p1	Chr09	20063290	20063562
Jr02_17960_p1	Chr02	31067472	31067666	Jr09_11100_p1	Chr09	20095146	20095328
Jr02_17970_p1	Chr02	31070990	31071145	Jr09_11120_p1	Chr09	20097718	20097809
Jr02_18040_p1	Chr02	31137047	31137336	Jr09_11160_p1	Chr09	20114959	20115168
Jr02_18050_p1	Chr02	31143742	31144005	Jr09_11170_p1	Chr09	20116790	20117185
Jr02_18100_p1	Chr02	31201506	31201836	Jr09_11200_p1	Chr09	20146687	20146905
Jr02_18120_p1	Chr02	31210684	31210885	Jr09_11210_p1	Chr09	20154212	20154677
Jr02_18140_p1	Chr02	31231951	31232427	Jr09_11220_p1	Chr09	20160930	20161014
Jr02_18160_p1	Chr02	31270094	31270228	Jr09_11230_p1	Chr09	20177638	20177775
Jr02_18180_p1	Chr02	31294852	31294929	Jr09_11250_p1	Chr09	20192951	20193028
Jr02_18200_p1	Chr02	31311976	31312335	Jr09_11260_p1	Chr09	20203819	20204172
Jr02_18220_p1	Chr02	31330820	31330961	Jr09_11280_p1	Chr09	20216065	20216265
Jr02_11990_p1	Chr02	23344640	23344885	Jr09_06830_p1	Chr09	16291406	16291816
Jr02_12010_p1	Chr02	23356784	23356963	Jr09_06850_p1	Chr09	16306618	16307123
Jr02_12030_p1	Chr02	23364200	23365966	Jr09_06860_p1	Chr09	16315298	16317124
Jr02_12040_p1	Chr02	23402957	23403386	Jr09_06870_p1	Chr09	16328997	16329344
Jr02_12050_p1	Chr02	23427085	23427475	Jr09_06880_p1	Chr09	16338992	16339435
Jr02_12090_p1	Chr02	23515560	23516134	Jr09_06890_p1	Chr09	16345665	16346218
Jr02_12120_p1	Chr02	23556241	23556360	Jr09_07000_p1	Chr09	16584032	16584339
Jr02_12140_p1	Chr02	23628410	23628456	Jr09_07010_p1	Chr09	16607163	16607209
Jr02_12260_p1	Chr02	23858310	23858876	Jr09_07020_p1	Chr09	16688925	16689491
Jr02_12280_p1	Chr02	23906112	23906820	Jr09_07050_p1	Chr09	16698298	16698973
Jr02_12350_p1	Chr02	23973701	23973914	Jr09_07120_p1	Chr09	16744824	16744960
Jr02_12360_p1	Chr02	24015986	24016192	Jr09_07130_p1	Chr09	16756632	16756832
Jr02_12430_p1	Chr02	24197195	24197541	Jr09_07180_p1	Chr09	16802573	16802788
Jr02_12440_p1	Chr02	24254918	24255119	Jr09_07220_p1	Chr09	16829721	16829895
Jr02_12480_p1	Chr02	24329193	24329366	Jr09_07250_p1	Chr09	16857382	16857540
Jr02_12520_p1	Chr02	24372984	24373010	Jr09_07310_p1	Chr09	16900045	16900114
Jr02_12640_p1	Chr02	24508548	24508630	Jr09_07330_p1	Chr09	16922293	16922441
Jr02_12670_p1	Chr02	24584132	24584142	Jr09_07340_p1	Chr09	16940368	16940492
Jr02_12710_p1	Chr02	24656451	24656563	Jr09_07350_p1	Chr09	16954327	16954605
Jr02_12730_p1	Chr02	24663645	24663957	Jr09_07360_p1	Chr09	16961722	16962037
Jr02_12740_p1	Chr02	24667422	24669062	Jr09_07370_p1	Chr09	16982736	16983083
Jr02_12800_p1	Chr02	24752867	24753061	Jr09_07380_p1	Chr09	16986802	16986843
Jr02_12840_p1	Chr02	24831453	24831683	Jr09_07390_p1	Chr09	17010640	17010863
Jr02_12850_p1	Chr02	24875010	24875408	Jr09_07430_p1	Chr09	17041955	17042369
Jr02_12870_p1	Chr02	24956899	24957609	Jr09_07440_p1	Chr09	17085556	17086260
Jr02_12900_p1	Chr02	25029682	25029792	Jr09_07450_p1	Chr09	17109180	17109318
Jr02_12910_p1	Chr02	25054383	25054884	Jr09_07470_p1	Chr09	17132525	17132679
Jr02_12920_p1	Chr02	25059119	25059136	Jr09_07480_p1	Chr09	17140064	17140171
Jr02_12950_p1	Chr02	25119196	25120125	Jr09_07510_p1	Chr09	17161124	17162246
Jr02_12980_p1	Chr02	25131216	25131396	Jr09_07520_p1	Chr09	17170701	17170798
Jr02_13000_p1	Chr02	25166938	25167123	Jr09_07530_p1	Chr09	17176638	17176810
Jr02_13010_p1	Chr02	25209174	25209547	Jr09_07540_p1	Chr09	17203283	17203641
Jr02_13040_p1	Chr02	25257608	25257705	Jr09_07560_p1	Chr09	17207335	17207929
Jr02_13050_p1	Chr02	25277115	25277802	Jr09_07570_p1	Chr09	17224298	17224957
Jr02_13070_p1	Chr02	25360079	25360765	Jr09_07580_p1	Chr09	17240907	17241433
Jr02_13080_p1	Chr02	25384654	25384796	Jr09_07590_p1	Chr09	17254977	17255474
Jr02_13100_p1	Chr02	25461881	25462204	Jr09_07600_p1	Chr09	17261241	17261594
Jr02_13110_p1	Chr02	25468724	25469827	Jr09_07610_p1	Chr09	17264924	17265177
Jr02_13120_p1	Chr02	25492471	25492875	Jr09_07620_p1	Chr09	17273946	17274266
Jr02_13130_p1	Chr02	25523352	25524218	Jr09_07640_p1	Chr09	17291663	17291863
Jr02_13140_p1	Chr02	25537151	25537381	Jr09_07660_p1	Chr09	17340504	17340573
Jr02_13150_p1	Chr02	25572260	25572422	Jr09_07690_p1	Chr09	17354867	17355032
Jr02_13190_p1	Chr02	25667253	25667698	Jr09_07700_p1	Chr09	17360566	17360826
Jr02_13210_p1	Chr02	25695218	25695532	Jr09_07720_p1	Chr09	17392365	17392703
Jr02_13220_p1	Chr02	25714431	25714693	Jr09_07730_p1	Chr09	17397211	17397479
Jr02_13230_p1	Chr02	25734481	25734783	Jr09_07740_p1	Chr09	17411979	17412263
Jr02_13250_p1	Chr02	25759285	25759451	Jr09_07760_p1	Chr09	17430313	17430392
Jr02_13270_p1	Chr02	25774801	25776785	Jr09_07770_p1	Chr09	17435314	17437298
Jr02_13290_p1	Chr02	25849428	25849626	Jr09_07880_p1	Chr09	17504720	17504912
Jr02_13320_p1	Chr02	25897825	25898081	Jr09_07890_p1	Chr09	17512612	17512785
Jr02_13330_p1	Chr02	25923012	25923270	Jr09_07900_p1	Chr09	17526616	17526844
Jr02_13360_p1	Chr02	25954958	25955449	Jr09_07930_p1	Chr09	17537608	17537800
Jr02_13400_p1	Chr02	25999517	25999579	Jr09_07950_p1	Chr09	17557010	17557504
Jr02_13410_p1	Chr02	26069567	26069947	Jr09_07960_p1	Chr09	17577240	17577614
Jr02_13420_p1	Chr02	26085345	26085390	Jr09_07970_p1	Chr09	17589789	17589926
Jr02_13470_p1	Chr02	26175902	26176022	Jr09_08020_p1	Chr09	17607881	17609043
Jr02_13480_p1	Chr02	26191863	26191905	Jr09_08070_p1	Chr09	17647055	17647209
Jr02_13490_p1	Chr02	26207126	26207312	Jr09_08090_p1	Chr09	17653402	17653581
Jr02_13520_p1	Chr02	26278126	26278243	Jr09_08100_p1	Chr09	17673584	17673792
Jr02_13540_p1	Chr02	26313090	26313263	Jr09_08110_p1	Chr09	17680051	17680261
Jr02_13550_p1	Chr02	26352952	26353267	Jr09_08130_p1	Chr09	17706918	17707235
Jr02_13580_p1	Chr02	26374328	26374396	Jr09_08140_p1	Chr09	17724531	17724653
Jr02_13740_p1	Chr02	26652431	26653025	Jr09_08220_p1	Chr09	17781111	17781265
Jr02_13850_p1	Chr02	26749990	26750465	Jr09_08280_p1	Chr09	17826786	17826999
Jr02_13860_p1	Chr02	26767685	26767778	Jr09_08290_p1	Chr09	17831503	17831645
Jr02_14010_p1	Chr02	26873217	26873304	Jr09_08330_p1	Chr09	17864259	17864425
Jr02_14020_p1	Chr02	26881328	26881550	Jr09_08350_p1	Chr09	17873325	17873505
Jr02_14040_p1	Chr02	26905744	26905884	Jr09_08360_p1	Chr09	17892070	17892210
Jr02_14060_p1	Chr02	26944074	26944308	Jr09_08380_p1	Chr09	17902890	17903382
Jr02_14090_p1	Chr02	26954563	26954585	Jr09_08400_p1	Chr09	17916986	17917146
Jr02_14130_p1	Chr02	26990393	26990633	Jr09_08410_p1	Chr09	17923934	17923963
Jr02_14160_p1	Chr02	27019201	27019279	Jr09_08420_p1	Chr09	17945368	17945446
Jr02_14170_p2	Chr02	27038265	27038666	Jr09_08450_p2	Chr09	17962220	17962844
Jr02_14170_p1	Chr02	27038486	27038666	Jr09_08450_p1	Chr09	17962438	17962844
Jr02_14180_p1	Chr02	27045529	27045745	Jr09_08480_p1	Chr09	17980616	17980754
Jr02_14220_p1	Chr02	27121000	27121136	Jr09_08540_p1	Chr09	18001313	18001963
Jr02_14300_p1	Chr02	27181382	27182056	Jr09_08580_p1	Chr09	18022454	18023209
Jr02_14410_p1	Chr02	27310767	27311025	Jr09_08620_p1	Chr09	18064485	18064791
Jr02_14420_p1	Chr02	27317398	27318642	Jr09_08630_p1	Chr09	18074431	18075651
Jr02_14440_p1	Chr02	27376494	27376932	Jr09_08650_p1	Chr09	18106162	18106380
Jr02_14480_p1	Chr02	27397486	27397545	Jr09_08670_p1	Chr09	18121233	18121363
Jr02_14500_p1	Chr02	27406929	27407147	Jr09_08690_p1	Chr09	18130450	18130671
Jr02_14520_p1	Chr02	27421471	27421888	Jr09_08710_p1	Chr09	18139882	18140275
Jr02_14540_p1	Chr02	27461187	27461450	Jr09_08740_p1	Chr09	18163299	18163571
Jr02_14560_p1	Chr02	27484789	27485037	Jr09_08780_p1	Chr09	18171925	18172092
Jr02_14570_p1	Chr02	27492279	27492638	Jr09_08790_p1	Chr09	18178384	18178692
Jr02_14610_p1	Chr02	27534173	27534621	Jr09_08800_p1	Chr09	18182582	18183244
Jr02_14730_p1	Chr02	27614451	27614656	Jr09_08810_p1	Chr09	18194170	18194259
Jr02_14780_p1	Chr02	27741780	27741866	Jr09_08870_p1	Chr09	18198884	18199390
Jr02_14820_p1	Chr02	27778349	27778534	Jr09_08910_p1	Chr09	18219882	18219893
Jr02_14830_p1	Chr02	27792439	27793680	Jr09_08930_p1	Chr09	18232229	18233473
Jr02_14850_p1	Chr02	27868760	27869005	Jr09_08960_p1	Chr09	18294460	18294708
Jr02_14860_p1	Chr02	27879426	27879592	Jr09_09030_p1	Chr09	18348084	18348098
Jr02_14890_p1	Chr02	27930638	27930736	Jr09_09090_p1	Chr09	18361882	18362007
Jr02_14900_p1	Chr02	27944696	27944844	Jr09_09100_p1	Chr09	18374524	18374672
Jr02_14910_p1	Chr02	27954310	27954818	Jr09_09130_p1	Chr09	18386345	18386750
Jr02_14950_p1	Chr02	28055954	28056220	Jr09_09150_p1	Chr09	18424125	18424547
Jr02_14960_p1	Chr02	28066240	28066391	Jr09_09170_p1	Chr09	18432690	18432841
Jr02_14980_p1	Chr02	28084949	28085324	Jr09_09190_p1	Chr09	18447622	18447642
Jr02_15010_p1	Chr02	28141035	28141658	Jr09_09210_p1	Chr09	18450915	18451529
Jr02_25370_p1	Chr02	36853982	36854486	Jr09_15880_p1	Chr09	23634967	23635139
Jr02_25400_p1	Chr02	36866755	36866972	Jr09_15910_p1	Chr09	23648937	23649026
Jr02_25420_p1	Chr02	36880535	36880819	Jr09_15940_p1	Chr09	23661466	23661753
Jr02_25430_p1	Chr02	36891843	36892083	Jr09_15970_p1	Chr09	23670246	23671565
Jr02_25470_p1	Chr02	36903636	36903857	Jr09_15980_p1	Chr09	23678091	23678312
Jr02_25490_p1	Chr02	36912532	36913038	Jr09_15990_p1	Chr09	23686355	23686505
Jr02_25520_p1	Chr02	36928211	36928718	Jr09_16000_p1	Chr09	23697163	23697517
Jr02_25540_p1	Chr02	36939390	36939485	Jr09_16030_p1	Chr09	23707043	23707360
Jr02_25630_p1	Chr02	36946815	36947037	Jr09_16060_p1	Chr09	23711290	23712188
Jr02_25660_p1	Chr02	36962745	36962894	Jr09_16080_p1	Chr09	23727947	23728197
Jr02_25760_p1	Chr02	37032015	37032283	Jr09_16100_p1	Chr09	23737515	23737662
Jr02_25770_p1	Chr02	37037093	37037387	Jr09_16110_p1	Chr09	23742404	23743426
Jr02_25780_p1	Chr02	37042416	37042570	Jr09_16120_p1	Chr09	23747648	23747802
Jr02_25790_p1	Chr02	37052742	37052826	Jr09_16160_p1	Chr09	23757497	23757770
Jr02_25820_p1	Chr02	37072538	37072868	Jr09_16170_p1	Chr09	23766037	23766151
Jr02_25860_p1	Chr02	37090339	37090647	Jr09_16220_p1	Chr09	23775661	23775913
Jr02_25870_p1	Chr02	37092897	37093664	Jr09_16230_p1	Chr09	23779876	23780634
Jr02_25890_p1	Chr02	37101903	37101938	Jr09_16250_p1	Chr09	23784346	23784402
Jr02_25900_p1	Chr02	37108890	37111100	Jr09_16260_p1	Chr09	23793390	23795513
Jr02_25940_p1	Chr02	37132220	37132332	Jr09_16300_p1	Chr09	23810242	23810406
Jr02_25960_p1	Chr02	37148581	37148880	Jr09_16310_p1	Chr09	23830266	23830565
Jr02_26020_p1	Chr02	37201714	37201816	Jr09_16410_p1	Chr09	23873388	23873490
Jr02_26050_p1	Chr02	37246885	37247134	Jr09_16430_p1	Chr09	23891112	23891331
Jr02_26070_p1	Chr02	37250938	37251394	Jr09_16440_p1	Chr09	23898752	23899051
Jr02_26080_p1	Chr02	37256480	37256534	Jr09_16470_p1	Chr09	23904524	23904578
Jr02_26100_p1	Chr02	37263149	37263421	Jr09_16480_p1	Chr09	23911848	23911977
Jr02_26150_p1	Chr02	37296205	37296582	Jr09_16520_p1	Chr09	23936899	23937116
Jr02_26200_p1	Chr02	37318482	37318622	Jr09_16610_p1	Chr09	23971287	23971433
Jr02_26210_p1	Chr02	37324895	37325187	Jr09_16620_p1	Chr09	23975927	23976046
Jr02_26220_p1	Chr02	37338731	37339095	Jr09_16660_p1	Chr09	23980840	23980972
Jr02_26240_p1	Chr02	37348278	37348512	Jr09_16680_p1	Chr09	24002726	24002967
Jr02_26250_p1	Chr02	37352622	37352781	Jr09_16690_p1	Chr09	24008135	24008257
Jr02_26280_p1	Chr02	37367380	37367652	Jr09_16710_p1	Chr09	24017898	24018067
Jr02_26350_p1	Chr02	37418716	37418945	Jr09_16720_p1	Chr09	24027122	24027547
Jr02_26400_p1	Chr02	37449589	37449822	Jr09_16740_p1	Chr09	24037340	24037933
Jr02_26410_p1	Chr02	37461008	37461579	Jr09_16770_p1	Chr09	24056271	24056444
Jr02_26470_p1	Chr02	37512635	37512904	Jr09_16810_p1	Chr09	24114292	24114670
Jr02_26510_p1	Chr02	37561317	37561477	Jr09_16840_p1	Chr09	24136341	24136501
Jr02_26550_p1	Chr02	37602050	37602336	Jr09_16890_p1	Chr09	24156506	24156799
Jr02_26600_p1	Chr02	37643045	37643458	Jr09_16910_p1	Chr09	24169909	24170322
Jr02_26670_p1	Chr02	37659961	37660025	Jr09_16920_p1	Chr09	24178845	24180581
Jr02_26690_p1	Chr02	37675353	37675467	Jr09_16930_p1	Chr09	24185878	24186874
Jr02_26710_p1	Chr02	37708841	37709007	Jr09_16940_p1	Chr09	24205220	24205386
Jr02_26750_p1	Chr02	37789778	37790098	Jr09_16970_p1	Chr09	24236267	24236445
Jr02_10220_p1	Chr02	17580111	17580455	Jr09_05830_p1	Chr09	15210929	15211246
Jr02_10230_p1	Chr02	17631986	17632539	Jr09_05840_p1	Chr09	15216138	15216686
Jr02_10240_p1	Chr02	17699320	17701053	Jr09_05850_p1	Chr09	15221475	15223169
Jr02_10250_p1	Chr02	17727386	17727695	Jr09_05860_p1	Chr09	15227931	15228156
Jr02_10260_p1	Chr02	17852126	17852349	Jr09_05890_p1	Chr09	15263919	15264605
Jr02_10320_p1	Chr02	18025980	18026148	Jr09_05910_p1	Chr09	15279931	15280386
Jr02_10340_p1	Chr02	18078683	18078915	Jr09_05970_p1	Chr09	15299265	15299478
Jr02_10360_p1	Chr02	18147205	18147414	Jr09_05990_p1	Chr09	15311896	15312307
Jr02_10370_p1	Chr02	18189822	18190142	Jr09_06000_p1	Chr09	15317559	15318308
Jr02_10400_p1	Chr02	18358766	18358833	Jr09_06020_p1	Chr09	15384597	15384930
Jr02_10460_p1	Chr02	18648450	18648776	Jr09_06100_p1	Chr09	15466318	15466531
Jr02_10550_p1	Chr02	18959783	18959799	Jr09_06140_p1	Chr09	15510738	15510754
Jr02_10560_p1	Chr02	19005319	19005589	Jr09_06160_p1	Chr09	15513927	15514016
Jr02_10580_p1	Chr02	19028557	19029648	Jr09_06170_p1	Chr09	15530462	15530552
Jr02_10590_p1	Chr02	19122802	19122962	Jr09_06180_p1	Chr09	15548481	15548724
Jr02_00090_p1	Chr02	75543	75811	Jr09_00050_p1	Chr09	220641	220940
Jr02_00190_p1	Chr02	245189	245366	Jr09_00170_p1	Chr09	730708	731092
Jr02_00200_p1	Chr02	259675	260667	Jr09_00180_p1	Chr09	801348	801431
Jr02_00210_p1	Chr02	278008	278315	Jr09_00190_p1	Chr09	814222	814533
Jr02_00280_p1	Chr02	367050	367142	Jr09_00240_p1	Chr09	1104223	1104274
Jr02_00360_p1	Chr02	429007	429297	Jr09_00290_p1	Chr09	1258703	1259027
Jr02_00410_p1	Chr02	492639	497407	Jr09_00300_p1	Chr09	1283877	1284044
Jr02_00430_p1	Chr02	499435	500107	Jr09_00350_p1	Chr09	1430190	1430787
Jr02_00440_p1	Chr02	506650	506842	Jr09_00360_p1	Chr09	1439252	1439432
Jr02_00460_p1	Chr02	526573	526924	Jr09_00390_p1	Chr09	1561121	1561435
Jr02_00480_p1	Chr02	536133	536610	Jr09_00410_p1	Chr09	1628308	1628659
Jr02_00510_p1	Chr02	578919	579333	Jr09_00420_p1	Chr09	1691826	1692198
Jr02_00530_p1	Chr02	602881	603267	Jr09_00440_p1	Chr09	1774152	1774505
Jr02_00630_p1	Chr02	745432	745440	Jr09_00530_p1	Chr09	2034226	2034389
Jr02_11290_p1	Chr02	21168194	21168644	Jr09_06530_p1	Chr09	16021911	16022220
Jr02_11320_p1	Chr02	21180635	21180925	Jr09_06570_p1	Chr09	16041221	16042672
Jr02_11360_p1	Chr02	21335158	21335334	Jr09_06590_p1	Chr09	16068954	16069083
Jr02_11450_p1	Chr02	21545208	21545333	Jr09_06620_p1	Chr09	16097477	16097901
Jr02_11500_p1	Chr02	21630407	21630558	Jr09_06630_p1	Chr09	16110561	16110833
Jr02_11540_p1	Chr02	21703181	21703519	Jr09_06670_p1	Chr09	16138662	16138781
Jr02_11550_p1	Chr02	21774433	21774751	Jr09_06730_p1	Chr09	16208138	16208443
Jr02_11610_p1	Chr02	21960639	21960817	Jr09_06740_p1	Chr09	16231264	16231496
Jr02_11630_p1	Chr02	22026742	22027002	Jr09_06760_p1	Chr09	16242874	16242984
Jr02_11690_p1	Chr02	22233140	22233387	Jr09_06770_p1	Chr09	16256558	16256899
Jr02_02680_p1	Chr02	2289817	2289884	Jr09_03890_p1	Chr09	12891219	12892395
Jr02_02750_p1	Chr02	2351816	2351857	Jr09_03870_p1	Chr09	12827852	12828042
Jr02_02790_p1	Chr02	2370656	2370788	Jr09_03860_p1	Chr09	12815245	12816094
Jr02_02800_p1	Chr02	2400284	2400603	Jr09_03850_p1	Chr09	12800570	12801115
Jr02_02820_p1	Chr02	2429329	2429886	Jr09_03810_p1	Chr09	12774472	12775035
Jr02_02850_p1	Chr02	2470328	2470618	Jr09_03770_p1	Chr09	12730393	12730720
Jr02_02890_p1	Chr02	2511222	2511334	Jr09_03740_p1	Chr09	12675786	12675997
Jr02_02920_p1	Chr02	2526534	2526702	Jr09_03720_p1	Chr09	12638678	12638889
Jr02_02980_p1	Chr02	2581179	2581559	Jr09_03710_p1	Chr09	12614088	12614165
Jr02_03020_p1	Chr02	2622624	2625104	Jr09_03640_p1	Chr09	12548660	12548691
Jr02_03120_p1	Chr02	2769950	2769990	Jr09_03610_p1	Chr09	12514153	12514386
Jr02_03160_p1	Chr02	2783590	2783790	Jr09_03600_p1	Chr09	12505163	12505364
Jr02_03230_p1	Chr02	2874993	2875181	Jr09_03510_p1	Chr09	12429772	12430323
Jr02_03260_p1	Chr02	2884137	2884726	Jr09_03470_p1	Chr09	12384508	12385203
Jr02_03270_p1	Chr02	2897735	2897833	Jr09_03450_p1	Chr09	12380996	12381290
Jr02_03290_p1	Chr02	2906587	2906690	Jr09_03430_p1	Chr09	12358081	12358374
Jr02_03390_p1	Chr02	3100179	3100208	Jr09_03360_p1	Chr09	12197440	12197477
Jr02_03430_p1	Chr02	3141585	3141715	Jr09_03330_p1	Chr09	12175030	12175224
Jr02_03440_p1	Chr02	3167372	3167498	Jr09_03280_p1	Chr09	12058742	12059228
Jr02_03470_p1	Chr02	3198879	3198901	Jr09_03260_p1	Chr09	12022008	12022259
Jr02_03480_p1	Chr02	3206313	3206672	Jr09_03250_p1	Chr09	12009916	12009999
Jr02_03490_p1	Chr02	3222002	3222627	Jr09_03230_p1	Chr09	11993874	11994018
Jr02_03510_p1	Chr02	3230135	3230210	Jr09_03210_p1	Chr09	11985080	11985112
Jr02_03640_p1	Chr02	3345881	3345949	Jr09_03190_p1	Chr09	11808647	11808790
Jr02_03650_p1	Chr02	3367107	3367353	Jr09_03180_p1	Chr09	11768968	11769228
Jr02_03750_p1	Chr02	3503335	3503418	Jr09_03170_p1	Chr09	11718155	11718464
Jr02_03860_p1	Chr02	3580738	3580882	Jr09_03160_p1	Chr09	11697389	11697525
Jr02_03880_p1	Chr02	3624454	3624493	Jr09_03130_p1	Chr09	11645574	11645678
Jr02_03890_p1	Chr02	3635286	3635411	Jr09_03090_p1	Chr09	11619491	11623897
Jr02_03940_p1	Chr02	3671740	3672015	Jr09_03060_p1	Chr09	11566067	11566189
Jr02_03950_p1	Chr02	3680354	3680598	Jr09_03030_p1	Chr09	11554127	11554559
Jr02_03960_p1	Chr02	3691748	3691885	Jr09_03020_p1	Chr09	11523167	11523756
Jr02_03980_p1	Chr02	3717512	3717667	Jr09_02970_p1	Chr09	11462965	11463345
Jr02_00660_p1	Chr02	792291	792913	Jr09_05200_p1	Chr09	14644557	14644969
Jr02_00670_p1	Chr02	800248	800536	Jr09_05190_p1	Chr09	14637219	14637443
Jr02_00710_p1	Chr02	860864	861211	Jr09_05120_p1	Chr09	14593807	14593922
Jr02_00720_p1	Chr02	870005	870139	Jr09_05110_p1	Chr09	14579158	14579453
Jr02_00730_p1	Chr02	873461	873859	Jr09_05100_p1	Chr09	14573815	14574489
Jr02_00810_p1	Chr02	917229	917575	Jr09_05020_p1	Chr09	14488235	14488280
Jr02_00840_p1	Chr02	938264	938362	Jr09_05010_p1	Chr09	14473270	14473568
Jr02_00860_p1	Chr02	967899	967970	Jr09_04990_p1	Chr09	14445116	14445375
Jr02_00870_p1	Chr02	981083	981255	Jr09_04980_p1	Chr09	14438856	14438975
Jr02_00970_p1	Chr02	1076443	1076763	Jr09_04940_p1	Chr09	14407554	14407630
Jr02_00980_p1	Chr02	1098175	1099710	Jr09_04930_p1	Chr09	14396182	14396259
Jr02_01000_p1	Chr02	1141271	1141384	Jr09_04890_p1	Chr09	14340855	14340953
Jr02_01070_p1	Chr02	1162088	1162295	Jr09_04880_p1	Chr09	14327204	14327353
Jr02_01150_p1	Chr02	1188124	1188676	Jr09_04790_p1	Chr09	14106599	14106782
Jr02_01160_p1	Chr02	1196381	1197731	Jr09_04760_p1	Chr09	14098191	14098424
Jr02_01170_p1	Chr02	1207471	1207522	Jr09_04660_p1	Chr09	13914027	13915415
Jr02_01180_p1	Chr02	1222826	1223016	Jr09_04630_p1	Chr09	13845428	13845622
Jr02_01200_p1	Chr02	1227281	1227382	Jr09_04620_p1	Chr09	13840813	13841050
Jr02_01210_p1	Chr02	1234216	1234250	Jr09_04610_p1	Chr09	13831422	13831627
Jr02_01250_p1	Chr02	1251979	1252015	Jr09_04580_p1	Chr09	13807905	13807991
Jr02_01300_p1	Chr02	1321425	1321550	Jr09_04540_p1	Chr09	13761312	13762349
Jr02_01400_p1	Chr02	1366913	1367188	Jr09_04500_p1	Chr09	13738454	13739770
Jr02_01410_p1	Chr02	1372108	1372611	Jr09_04460_p1	Chr09	13706329	13706622
Jr02_01800_p1	Chr02	1525999	1526203	Jr09_04360_p1	Chr09	13617192	13617283
Jr02_01830_p1	Chr02	1553072	1553153	Jr09_04320_p1	Chr09	13508804	13509010
Jr02_01930_p1	Chr02	1595702	1596551	Jr09_04290_p1	Chr09	13495828	13497785
Jr02_01970_p1	Chr02	1640250	1640529	Jr09_04270_p1	Chr09	13458290	13460104
Jr02_02020_p1	Chr02	1680075	1680461	Jr09_04220_p1	Chr09	13354789	13354964
Jr02_02100_p1	Chr02	1758564	1758597	Jr09_04170_p1	Chr09	13249151	13249308
Jr02_02110_p1	Chr02	1795607	1795674	Jr09_04150_p1	Chr09	13214619	13214657
Jr02_02120_p1	Chr02	1813760	1814013	Jr09_04130_p1	Chr09	13176600	13176629
Jr02_02140_p1	Chr02	1820317	1820445	Jr09_04110_p1	Chr09	13173532	13173902
Jr02_02150_p1	Chr02	1835758	1837512	Jr09_04080_p1	Chr09	13149068	13149287
Jr02_02160_p1	Chr02	1846697	1846899	Jr09_04070_p1	Chr09	13145948	13146402
Jr02_02260_p1	Chr02	1955995	1956212	Jr09_04050_p1	Chr09	13089157	13089780
Jr02_02290_p1	Chr02	1993149	1993295	Jr09_04040_p1	Chr09	13064945	13064963
Jr02_02410_p1	Chr02	2146666	2146811	Jr09_04010_p1	Chr09	13024950	13025434
Jr02_02430_p1	Chr02	2165713	2166572	Jr09_03970_p1	Chr09	13007240	13007326
Jr02_02450_p1	Chr02	2169482	2169721	Jr09_03960_p1	Chr09	13001184	13001336
Jr02_02490_p1	Chr02	2181350	2181398	Jr09_03950_p1	Chr09	12996897	12997365
Jr02_02500_p1	Chr02	2193706	2195586	Jr09_03940_p1	Chr09	12958461	12960344
Jr02_02540_p1	Chr02	2213882	2213925	Jr09_03930_p1	Chr09	12916400	12916638
Jr02_05390_p1	Chr02	6157500	6160323	Jr09_02060_p1	Chr09	8472538	8472563
Jr02_05450_p1	Chr02	6302198	6302593	Jr09_01960_p1	Chr09	8079044	8079228
Jr02_05540_p1	Chr02	6408246	6408368	Jr09_01950_p1	Chr09	7960041	7960139
Jr02_05550_p1	Chr02	6412870	6413091	Jr09_01940_p1	Chr09	7926553	7926804
Jr02_05580_p1	Chr02	6444052	6445242	Jr09_01920_p1	Chr09	7778349	7778511
Jr02_05610_p1	Chr02	6484700	6484844	Jr09_01910_p1	Chr09	7767452	7768006
Jr02_05630_p1	Chr02	6495477	6496700	Jr09_01890_p1	Chr09	7675865	7677151
Jr02_05710_p1	Chr02	6600687	6601422	Jr09_01860_p1	Chr09	7349061	7349193
Jr02_05760_p1	Chr02	6720333	6720611	Jr09_01800_p1	Chr09	7035390	7035936
Jr02_05800_p1	Chr02	6763068	6763262	Jr09_01780_p1	Chr09	7020032	7020135
Jr02_05860_p1	Chr02	6872932	6873015	Jr09_01740_p1	Chr09	6821875	6822468
Jr02_05880_p1	Chr02	6898269	6898543	Jr09_01730_p1	Chr09	6785123	6785432
Jr02_05920_p1	Chr02	6931204	6931548	Jr09_01700_p1	Chr09	6674481	6674578
Jr02_05930_p1	Chr02	6936948	6937244	Jr09_01670_p1	Chr09	6588212	6588392
Jr02_05970_p1	Chr02	7003370	7003674	Jr09_01630_p1	Chr09	6321817	6322133
Jr02_04400_p1	Chr02	4190981	4191172	Jr09_02530_p1	Chr09	10127656	10127793
Jr02_04430_p1	Chr02	4234311	4234485	Jr09_02490_p1	Chr09	10085501	10086332
Jr02_04530_p1	Chr02	4364363	4364752	Jr09_02480_p1	Chr09	10057616	10058366
Jr02_04550_p1	Chr02	4396554	4396644	Jr09_02470_p1	Chr09	10036615	10037014
Jr02_04560_p1	Chr02	4408212	4408372	Jr09_02460_p1	Chr09	10012825	10013226
Jr02_04570_p1	Chr02	4438234	4438686	Jr09_02450_p1	Chr09	10009336	10010535
Jr02_04650_p1	Chr02	4500435	4500608	Jr09_02370_p1	Chr09	9830447	9830570
Jr02_04670_p1	Chr02	4571435	4571753	Jr09_02340_p1	Chr09	9724520	9724678
Jr02_04730_p1	Chr02	4683990	4684793	Jr09_02230_p1	Chr09	9099454	9099569
Jr02_06060_p1	Chr02	7124657	7124891	Jr09_01480_p1	Chr09	5664413	5664558
Jr02_06110_p1	Chr02	7188261	7189262	Jr09_01470_p1	Chr09	5610404	5611390
Jr02_06120_p1	Chr02	7242573	7242645	Jr09_01460_p1	Chr09	5596106	5596117
Jr02_06130_p1	Chr02	7261029	7261418	Jr09_01390_p1	Chr09	5552990	5553009
Jr02_06180_p1	Chr02	7361859	7362103	Jr09_01370_p1	Chr09	5436099	5436519
Jr02_06220_p1	Chr02	7408728	7411978	Jr09_01340_p1	Chr09	5387225	5387288
Jr02_18310_p1	Chr02	31372849	31374572	Jr10_08240_p1	Chr10	5790948	5791282
Jr02_18370_p1	Chr02	31402973	31403184	Jr10_08300_p1	Chr10	5806021	5806286
Jr02_18460_p1	Chr02	31490694	31491062	Jr10_08350_p1	Chr10	5868409	5868641
Jr02_18470_p1	Chr02	31498573	31498703	Jr10_08380_p1	Chr10	5878241	5878588
Jr02_18560_p1	Chr02	31591377	31591614	Jr10_08450_p1	Chr10	5926654	5927101
Jr02_18570_p1	Chr02	31596266	31597207	Jr10_08490_p1	Chr10	5960817	5961788
Jr02_18590_p1	Chr02	31611653	31613278	Jr10_08530_p1	Chr10	6011062	6012708
Jr02_18640_p1	Chr02	31675645	31676181	Jr10_08610_p1	Chr10	6032293	6033006
Jr02_03150_p1	Chr02	2774963	2775110	Jr10_03440_p1	Chr10	2213892	2213986
Jr02_03230_p1	Chr02	2874993	2875181	Jr10_03400_p1	Chr10	2198235	2198305
Jr02_03260_p1	Chr02	2884137	2884726	Jr10_03390_p1	Chr10	2174201	2174821
Jr02_03300_p1	Chr02	2933222	2933408	Jr10_03330_p1	Chr10	2141482	2141590
Jr02_03400_p1	Chr02	3112946	3113190	Jr10_03240_p1	Chr10	2090993	2091865
Jr02_03470_p1	Chr02	3198879	3198901	Jr10_03170_p1	Chr10	2065463	2065676
Jr02_03490_p1	Chr02	3222002	3222627	Jr10_03150_p1	Chr10	2048470	2048699
Jr02_03600_p1	Chr02	3296792	3297118	Jr10_03120_p1	Chr10	2035497	2035758
Jr02_03690_p1	Chr02	3466755	3466881	Jr10_03100_p1	Chr10	2029032	2029335
Jr02_16360_p1	Chr02	29601593	29601811	Jr12_05050_p1	Chr12	6484291	6484512
Jr02_16480_p1	Chr02	29723223	29723451	Jr12_05000_p1	Chr12	6349178	6349972
Jr02_16490_p1	Chr02	29730516	29730630	Jr12_04990_p1	Chr12	6343088	6343145
Jr02_16520_p1	Chr02	29741182	29741265	Jr12_04940_p1	Chr12	6170509	6170663
Jr02_16570_p1	Chr02	29787910	29789848	Jr12_04920_p1	Chr12	6142237	6142394
Jr02_16600_p1	Chr02	29828442	29829416	Jr12_04870_p1	Chr12	6065257	6065412
Jr02_16620_p1	Chr02	29853343	29853475	Jr12_04850_p1	Chr12	6043421	6043671
Jr02_16640_p1	Chr02	29870176	29870286	Jr12_04830_p1	Chr12	6001574	6001779
Jr02_16750_p1	Chr02	29965984	29966794	Jr12_04790_p1	Chr12	5948738	5949021
Jr02_16810_p1	Chr02	30028096	30028482	Jr12_04760_p1	Chr12	5831674	5833203
Jr02_04400_p1	Chr02	4190981	4191172	Jr13_16620_p1	Chr13	13573820	13573825
Jr02_04430_p1	Chr02	4234311	4234485	Jr13_16560_p1	Chr13	13481939	13482770
Jr02_04550_p1	Chr02	4396554	4396644	Jr13_16530_p1	Chr13	13434507	13434589
Jr02_04660_p1	Chr02	4517842	4518286	Jr13_16410_p1	Chr13	13309314	13309831
Jr02_04680_p1	Chr02	4591960	4592065	Jr13_16360_p1	Chr13	13221956	13222862
Jr02_04770_p1	Chr02	4722053	4722429	Jr13_16310_p1	Chr13	13123464	13123611
Jr02_04820_p1	Chr02	4775183	4775225	Jr13_16200_p1	Chr13	12900577	12900905
Jr02_04910_p1	Chr02	4898127	4898348	Jr13_16120_p1	Chr13	12800310	12800558
Jr02_04990_p1	Chr02	4986379	4986534	Jr13_16070_p1	Chr13	12734563	12734607
Jr02_05020_p2	Chr02	5010958	5011213	Jr13_16050_p1	Chr13	12704654	12704778
Jr02_15190_p1	Chr02	28429502	28429798	Jr13_23920_p1	Chr13	30757659	30757784
Jr02_15280_p1	Chr02	28519401	28519696	Jr13_23870_p1	Chr13	30683452	30683597
Jr02_15300_p1	Chr02	28539495	28539994	Jr13_23850_p1	Chr13	30669479	30669745
Jr02_15380_p1	Chr02	28617198	28617520	Jr13_23780_p1	Chr13	30606468	30606589
Jr02_15400_p1	Chr02	28625418	28625516	Jr13_23750_p1	Chr13	30518092	30518703
Jr02_15410_p1	Chr02	28642008	28642306	Jr13_23740_p1	Chr13	30481488	30481719
Jr02_15500_p1	Chr02	28751693	28751716	Jr13_23670_p1	Chr13	30433976	30434114
Jr02_15510_p1	Chr02	28787403	28787989	Jr13_23640_p1	Chr13	30363935	30365014
Jr02_05440_p1	Chr02	6250381	6250444	Jr13_15990_p1	Chr13	12526431	12526608
Jr02_05450_p1	Chr02	6302198	6302593	Jr13_15870_p1	Chr13	12382566	12382583
Jr02_05500_p1	Chr02	6391437	6391546	Jr13_15840_p1	Chr13	12345121	12345457
Jr02_05550_p1	Chr02	6412870	6413091	Jr13_15790_p1	Chr13	12316874	12317163
Jr02_05580_p1	Chr02	6444052	6445242	Jr13_15780_p1	Chr13	12307890	12308112
Jr02_05630_p1	Chr02	6495477	6496700	Jr13_15730_p1	Chr13	12248837	12249025
Jr02_05640_p1	Chr02	6503975	6504227	Jr13_15720_p1	Chr13	12236800	12237116
Jr02_05760_p1	Chr02	6720333	6720611	Jr13_15620_p1	Chr13	12108507	12108870
Jr02_00440_p1	Chr02	506650	506842	Jr16_14480_p1	Chr16	22489268	22489456
Jr02_00460_p1	Chr02	526573	526924	Jr16_14450_p1	Chr16	22450691	22450742
Jr02_00530_p1	Chr02	602881	603267	Jr16_14430_p1	Chr16	22378113	22378598
Jr02_00580_p1	Chr02	683667	683713	Jr16_14390_p1	Chr16	22332590	22332934
Jr02_00590_p1	Chr02	699888	700040	Jr16_14360_p1	Chr16	22302999	22303652
Jr02_00640_p1	Chr02	765843	766023	Jr16_14290_p1	Chr16	22251504	22251576
Jr02_00660_p1	Chr02	792291	792913	Jr16_14270_p1	Chr16	22215860	22215925
Jr02_00770_p1	Chr02	887579	890092	Jr16_14220_p1	Chr16	22128413	22130710
Jr02_00800_p1	Chr02	910962	911942	Jr16_14130_p1	Chr16	22067861	22067987
Jr02_00860_p1	Chr02	967899	967970	Jr16_14070_p1	Chr16	21995159	21995412
Jr03_02330_p1	Chr03	1580826	1581300	Jr04_21110_p1	Chr04	33611161	33611499
Jr03_02340_p1	Chr03	1584813	1586873	Jr04_21100_p1	Chr04	33603874	33605922
Jr03_02350_p1	Chr03	1600341	1600481	Jr04_21090_p1	Chr04	33601367	33601650
Jr03_02380_p1	Chr03	1622123	1622194	Jr04_21080_p1	Chr04	33588458	33589198
Jr03_02390_p1	Chr03	1631150	1631689	Jr04_21070_p1	Chr04	33581008	33581314
Jr03_02450_p1	Chr03	1673263	1673484	Jr04_21050_p1	Chr04	33569105	33569401
Jr03_02460_p1	Chr03	1678441	1678525	Jr04_21020_p1	Chr04	33562584	33562614
Jr03_02470_p1	Chr03	1682259	1682636	Jr04_21010_p1	Chr04	33560207	33560482
Jr03_02490_p1	Chr03	1693421	1693528	Jr04_20990_p1	Chr04	33553786	33553890
Jr03_02510_p1	Chr03	1730468	1731613	Jr04_20940_p1	Chr04	33511569	33512761
Jr03_02530_p1	Chr03	1746695	1746834	Jr04_20890_p1	Chr04	33466647	33466973
Jr03_02560_p1	Chr03	1778214	1779035	Jr04_20880_p1	Chr04	33445662	33446522
Jr03_02590_p1	Chr03	1789832	1790061	Jr04_20870_p1	Chr04	33444608	33444743
Jr03_02610_p1	Chr03	1814666	1814826	Jr04_20850_p1	Chr04	33435595	33435736
Jr03_02620_p1	Chr03	1822777	1823088	Jr04_20830_p1	Chr04	33411198	33411558
Jr03_02650_p1	Chr03	1828489	1830850	Jr04_20820_p1	Chr04	33402680	33403182
[truncated: 482 more rows]
