# Supplementary material for: Genome-Wide Identification and Transcriptional Expression Profiles of Transcription Factor WRKY in Common Walnut (Juglans regia L.)
Source: Genes (Basel). 2021 Sep 19;12(9):1444. doi: 10.3390/genes12091444 (PMC8466090; doi:10.3390/genes12091444)
Supplement: Supplementary file 1 [file genes-12-01444-s001.zip › TableS6.xlsx]

## Sheet: Sheet1
Table S6. The ka/ks value of WRKY genes in walnut.
Gene ID1	Gene ID2	Ka	Ks	Ka/Ks	Selection pressure	Duplcation type
Jr01_06810_p1	Jr02_18570_p1	0.798644	1.9974	0.399841	positive	collinearity
Jr01_18750_p1	Jr02_18380_p1	1.24483	2.29491	0.542428	positive	collinearity
Jr02_00640_p1	Jr02_18220_p1	1.17872	1.80931	0.651472	positive	collinearity
Jr02_16420_p1	Jr02_18120_p1	1.18785	2.78236	0.426922	positive	collinearity
Jr02_17180_p1	Jr02_18100_p1	1.15397	2.49351	0.462791	positive	collinearity
Jr03_22520_p1	Jr02_03740_p1	1.22877	3.51011	0.350065	positive	collinearity
Jr03_23890_p1	Jr02_03700_p1	1.05365	4.79994	0.219513	positive	collinearity
Jr07_32310_p1	Jr02_22900_p1	1.55993	2.83955	0.549359	positive	collinearity
Jr07_32310_p1	Jr02_22860_p1	1.27513	3.13664	0.406527	positive	collinearity
Jr07_32310_p1	Jr02_22820_p1	1.30753	2.52547	0.517738	positive	collinearity
Jr08_00860_p1	Jr02_24830_p1	1.4511	3.55215	0.408513	positive	collinearity
Jr08_11410_p1	Jr02_24670_p1	0.951525	2.57121	0.370069	positive	collinearity
Jr01_03150_p1	Jr01_03140_p1	0.0391914	0.041278	0.949449	positive	tandem
Jr02_25520_p1	Jr02_25510_p1	0.00678258	0.00548198	1.23725	negative	tandem
Jr04_00640_p1	Jr04_00630_p1	0.0579125	0.0460873	1.25658	negative	tandem
Jr06_10200_p1	Jr06_10190_p1	0	0.0107529	0	positive	tandem
Jr08_00870_p1	Jr08_00880_p1	0.0296423	0.0257817	1.14974	negative	tandem
Jr08_14560_p1	Jr08_14570_p1	0.0216764	0.0264054	0.820908	positive	tandem
Jr10_04770_p1	Jr10_04760_p1	0.0571411	0.118556	0.481975	positive	tandem
Jr15_12650_p1	Jr15_12660_p2	0.0897232	0.250546	0.358111	positive	tandem
