# Supplementary material for: Genome-Wide Identification and Transcriptional Expression Profiles of Transcription Factor WRKY in Common Walnut (Juglans regia L.)
Source: Genes (Basel). 2021 Sep 19;12(9):1444. doi: 10.3390/genes12091444 (PMC8466090; doi:10.3390/genes12091444)
Supplement: Supplementary file 1 [file genes-12-01444-s001.zip › TableS7.xlsx]

## Sheet: Sheet1
TableS7. The collinearity in J. regia, A. thaliana, J. mandshurica, J. microcarpa, P. trichocarpa, and Q. robur and their related information
J. regia Chr name	Gene id	Chr name	Gene id
Chr01	Jr01_06810_p1	3	AT3G01970.1	A. thaliana
Chr01	Jr01_03150_p1	3	AT3G01080.2
Chr01	Jr01_15550_p1	4	AT4G39410.1
Chr01	Jr01_15790_p1	5	AT5G64810.1
Chr02	Jr02_16420_p1	4	AT4G11070.1
Chr02	Jr02_16420_p1	4	AT4G23810.1
Chr02	Jr02_17180_p1	4	AT4G23550.1
Chr02	Jr02_26760_p1	5	AT5G56270.1
Chr03	Jr03_22520_p1	2	AT2G37260.1
Chr03	Jr03_26460_p1	2	AT2G38470.1
Chr03	Jr03_11540_p1	4	AT4G22070.2
Chr03	Jr03_11540_p1	4	AT4G04450.1
Chr04	Jr04_13770_p1	1	AT1G62300.1
Chr04	Jr04_13770_p1	4	AT4G04450.1
Chr04	Jr04_13770_p1	4	AT4G22070.2
Chr05	Jr05_06670_p1	2	AT2G30250.1
Chr07	Jr07_32310_p1	1	AT1G80840.1
Chr07	Jr07_38970_p1	2	AT2G40740.3
Chr07	Jr07_38980_p1	2	AT2G40750.1
Chr07	Jr07_08410_p1	2	AT2G46400.1
Chr07	Jr07_07550_p1	2	AT2G46130.1
Chr07	Jr07_07490_p1	4	AT4G01250.1
Chr08	Jr08_11260_p1	2	AT2G47260.1
Chr08	Jr08_00870_p1	2	AT2G25000.1
Chr08	Jr08_00860_p1	2	AT2G25000.2
Chr09	Jr09_10570_p1	1	AT1G64000.1
Chr09	Jr09_09980_p1	2	AT2G46400.1
Chr09	Jr09_09980_p1	4	AT4G11070.1
Chr09	Jr09_09980_p1	4	AT4G23810.1
Chr09	Jr09_10580_p1	4	AT4G23550.1
Chr09	Jr09_10570_p1	5	AT5G41570.1
Chr10	Jr10_25600_p1	2	AT2G04880.2
Chr10	Jr10_04770_p1	3	AT3G01970.1
Chr10	Jr10_01810_p1	3	AT3G01080.2
Chr10	Jr10_10930_p1	4	AT4G39410.1
Chr10	Jr10_11120_p1	5	AT5G64810.1
Chr10	Jr10_02340_p1	5	AT5G15130.1
Chr11	Jr11_30170_p1	1	AT1G80840.1
Chr11	Jr11_16330_p1	2	AT2G47260.1
Chr11	Jr11_30170_p1	2	AT2G25000.1
Chr11	Jr11_16330_p1	3	AT3G62340.1
Chr11	Jr11_30170_p1	4	AT4G31800.1
Chr11	Jr11_30180_p1	4	AT4G31800.2
Chr12	Jr12_20670_p1	1	AT1G80840.1
Chr12	Jr12_25170_p1	2	AT2G40740.3
Chr12	Jr12_04430_p1	2	AT2G46130.1
Chr12	Jr12_04410_p1	4	AT4G01250.1
Chr12	Jr12_10150_p1	5	AT5G49520.1
Chr13	Jr13_14610_p1	1	AT1G69310.1
Chr13	Jr13_14850_p1	1	AT1G13960.1
Chr13	Jr13_16070_p1	1	AT1G69810.1
Chr13	Jr13_14850_p1	2	AT2G03340.1
Chr13	Jr13_12290_p1	5	AT5G13080.1
Chr13	Jr13_30630_p1	5	AT5G52830.1
Chr14	Jr14_02960_p1	2	AT2G44745.1
Chr14	Jr14_08090_p1	2	AT2G30250.1
Chr15	Jr15_12660_p1	4	AT4G30935.1
Chr16	Jr16_12590_p1	1	AT1G69310.1
Chr16	Jr16_12390_p1	1	AT1G13960.1
Chr16	Jr16_12390_p1	2	AT2G03340.1
Chr16	Jr16_14290_p1	5	AT5G13080.1
Chr01	Jr01_18750_p1	Sca10	Jma000014733	J.mandshurica
Chr01	Jr01_15550_p1	Sca3	Jma000001505
Chr01	Jr01_18750_p1	Sca3	Jma000001447
Chr01	Jr01_22930_p1	Sca3	Jma000001512
Chr01	Jr01_06810_p1	Sca3	Jma000018033
Chr01	Jr01_03150_p1	Sca3	Jma000018161
Chr01	Jr01_18750_p1	Sca4	Jma000027256
Chr01	Jr01_15550_p1	Sca4	Jma000027879
Chr01	Jr01_15790_p1	Sca4	Jma000027513
Chr01	Jr01_03150_p1	Sca4	Jma000028006
Chr01	Jr01_06810_p1	Sca4	Jma000027457
Chr01	Jr01_06810_p1	Sca5	Jma000019049
Chr01	Jr01_06810_p1	Sca6	Jma000016826
Chr01	Jr01_03150_p1	Sca6	Jma000016493
Chr01	Jr01_18750_p1	Sca9	Jma000006711
Chr02	Jr02_16420_p1	Sca1	Jma000010129
Chr02	Jr02_17180_p1	Sca1	Jma000024913
Chr02	Jr02_04990_p1	Sca11	Jma000020999
Chr02	Jr02_16420_p1	Sca11	Jma000026910
Chr02	Jr02_17180_p1	Sca11	Jma000027113
Chr02	Jr02_25520_p1	Sca11	Jma000027078
Chr02	Jr02_26760_p1	Sca11	Jma000027107
Chr02	Jr02_00640_p1	Sca11	Jma000023701
Chr02	Jr02_16420_p1	Sca12	Jma000008085
Chr02	Jr02_17180_p1	Sca12	Jma000008614
Chr02	Jr02_25520_p1	Sca12	Jma000008082
Chr02	Jr02_00640_p1	Sca3	Jma000018033
Chr02	Jr02_00640_p1	Sca5	Jma000019049
Chr02	Jr02_00640_p1	Sca6	Jma000016826
Chr03	Jr03_11540_p1	Sca10	Jma000014733
Chr03	Jr03_08810_p1	Sca10	Jma000014446
Chr03	Jr03_26460_p1	Sca10	Jma000003254
Chr03	Jr03_27180_p1	Sca10	Jma000003263
Chr03	Jr03_22520_p1	Sca10	Jma000007218
Chr03	Jr03_15160_p1	Sca10	Jma000014611
Chr03	Jr03_23890_p1	Sca10	Jma000023109
Chr03	Jr03_26460_p1	Sca13	Jma000005551
Chr03	Jr03_11540_p1	Sca3	Jma000001447
Chr03	Jr03_08810_p1	Sca9	Jma000006491
Chr03	Jr03_11540_p1	Sca9	Jma000006711
Chr03	Jr03_15160_p1	Sca9	Jma000006981
Chr03	Jr03_17800_p1	Sca9	Jma000013751
Chr03	Jr03_23890_p1	Sca9	Jma000024211
Chr03	Jr03_26460_p1	Sca9	Jma000024548
Chr03	Jr03_27180_p1	Sca9	Jma000024134
Chr04	Jr04_00640_p1	Sca1	Jma000011029
Chr04	Jr04_15560_p1	Sca10	Jma000014446
Chr04	Jr04_00640_p1	Sca10	Jma000003263
Chr04	Jr04_01100_p1	Sca10	Jma000003254
Chr04	Jr04_02750_p1	Sca10	Jma000023109
Chr04	Jr04_03890_p1	Sca10	Jma000007218
Chr04	Jr04_10710_p1	Sca10	Jma000014611
Chr04	Jr04_13770_p1	Sca10	Jma000014733
Chr04	Jr04_01100_p1	Sca13	Jma000005551
Chr04	Jr04_13770_p1	Sca9	Jma000006711
Chr04	Jr04_15560_p1	Sca9	Jma000006491
Chr04	Jr04_00640_p1	Sca9	Jma000024134
Chr04	Jr04_01100_p1	Sca9	Jma000024548
Chr04	Jr04_02750_p1	Sca9	Jma000024211
Chr04	Jr04_10710_p1	Sca9	Jma000006981
Chr05	Jr05_06670_p1	Sca13	Jma000005551
Chr05	Jr05_06670_p1	Sca14	Jma000022693
Chr06	Jr06_10200_p1	Sca15	Jma000018652
Chr07	Jr07_07490_p1	Sca1	Jma000024913
Chr07	Jr07_07550_p1	Sca1	Jma000024871
Chr07	Jr07_08410_p1	Sca1	Jma000010129
Chr07	Jr07_11780_p1	Sca1	Jma000005693
Chr07	Jr07_12950_p1	Sca1	Jma000005783
Chr07	Jr07_32310_p1	Sca1	Jma000025912
Chr07	Jr07_38970_p1	Sca1	Jma000011098
Chr07	Jr07_38980_p1	Sca1	Jma000011029
Chr07	Jr07_08410_p1	Sca11	Jma000026910
Chr07	Jr07_07490_p1	Sca11	Jma000027113
Chr07	Jr07_08410_p1	Sca12	Jma000008085
Chr07	Jr07_07490_p1	Sca12	Jma000008614
Chr07	Jr07_32310_p1	Sca2	Jma000000591
Chr07	Jr07_07490_p1	Sca2	Jma000000167
Chr07	Jr07_07550_p1	Sca2	Jma000000201
Chr07	Jr07_11780_p1	Sca2	Jma000012002
Chr07	Jr07_08410_p1	Sca6	Jma000009976
Chr07	Jr07_32310_p1	Sca7	Jma000023456
Chr07	Jr07_32310_p1	Sca8	Jma000009151
Chr08	Jr08_00860_p1	Sca1	Jma000025912
Chr08	Jr08_00860_p1	Sca7	Jma000023456
Chr08	Jr08_11260_p1	Sca7	Jma000012862
Chr08	Jr08_11410_p1	Sca7	Jma000013059
Chr08	Jr08_00860_p1	Sca8	Jma000009151
Chr08	Jr08_11260_p1	Sca8	Jma000022318
Chr08	Jr08_11410_p1	Sca8	Jma000022468
Chr08	Jr08_14560_p1	Sca8	Jma000022508
Chr09	Jr09_10580_p1	Sca1	Jma000024913
Chr09	Jr09_09980_p1	Sca1	Jma000010129
Chr09	Jr09_16000_p1	Sca11	Jma000027078
Chr09	Jr09_09980_p1	Sca11	Jma000026910
Chr09	Jr09_10580_p1	Sca11	Jma000027113
Chr09	Jr09_02120_p1	Sca11	Jma000020999
Chr09	Jr09_09980_p1	Sca12	Jma000008085
Chr09	Jr09_10580_p1	Sca12	Jma000008614
Chr09	Jr09_16000_p1	Sca12	Jma000008082
Chr09	Jr09_02120_p1	Sca12	Jma000028153
Chr09	Jr09_10570_p1	Sca2	Jma000000201
Chr09	Jr09_10580_p1	Sca2	Jma000000167
Chr10	Jr10_13870_p1	Sca10	Jma000014733
Chr10	Jr10_01810_p1	Sca3	Jma000018161
Chr10	Jr10_04770_p1	Sca3	Jma000018033
Chr10	Jr10_10930_p1	Sca3	Jma000001505
Chr10	Jr10_13870_p1	Sca3	Jma000001447
Chr10	Jr10_01810_p1	Sca4	Jma000028006
Chr10	Jr10_02340_p1	Sca4	Jma000027685
Chr10	Jr10_04770_p1	Sca4	Jma000027457
Chr10	Jr10_25600_p1	Sca4	Jma000002148
Chr10	Jr10_10930_p1	Sca4	Jma000027879
Chr10	Jr10_11120_p1	Sca4	Jma000027513
Chr10	Jr10_13870_p1	Sca4	Jma000027256
Chr10	Jr10_01810_p1	Sca5	Jma000020059
Chr10	Jr10_02340_p1	Sca5	Jma000019363
Chr10	Jr10_01810_p1	Sca6	Jma000016493
Chr10	Jr10_13870_p1	Sca9	Jma000006711
Chr11	Jr11_30170_p1	Sca1	Jma000025912
Chr11	Jr11_16330_p1	Sca1	Jma000005693
Chr11	Jr11_16330_p1	Sca2	Jma000012002
Chr11	Jr11_16150_p1	Sca7	Jma000013059
Chr11	Jr11_16330_p1	Sca7	Jma000012862
Chr11	Jr11_30170_p1	Sca7	Jma000023456
Chr11	Jr11_30170_p1	Sca8	Jma000009151
Chr11	Jr11_16150_p1	Sca8	Jma000022468
Chr11	Jr11_16330_p1	Sca8	Jma000022318
Chr12	Jr12_20670_p1	Sca1	Jma000025912
Chr12	Jr12_25170_p1	Sca1	Jma000011098
Chr12	Jr12_04410_p1	Sca1	Jma000024913
Chr12	Jr12_04430_p1	Sca1	Jma000024871
Chr12	Jr12_10150_p1	Sca1	Jma000005693
Chr12	Jr12_04410_p1	Sca11	Jma000027113
Chr12	Jr12_04410_p1	Sca12	Jma000008614
Chr12	Jr12_10150_p1	Sca2	Jma000012002
Chr12	Jr12_20670_p1	Sca2	Jma000000591
Chr12	Jr12_25170_p1	Sca2	Jma000000758
Chr12	Jr12_04410_p1	Sca2	Jma000000167
Chr12	Jr12_04430_p1	Sca2	Jma000000201
Chr12	Jr12_20670_p1	Sca7	Jma000023456
Chr12	Jr12_10150_p1	Sca7	Jma000012862
Chr12	Jr12_20670_p1	Sca8	Jma000009151
Chr13	Jr13_30130_p1	Sca1	Jma000010129
Chr13	Jr13_30630_p1	Sca11	Jma000027113
Chr13	Jr13_16070_p1	Sca11	Jma000020999
Chr13	Jr13_30130_p1	Sca12	Jma000008085
Chr13	Jr13_30630_p1	Sca12	Jma000008614
Chr13	Jr13_05050_p1	Sca5	Jma000019718
Chr13	Jr13_12290_p1	Sca5	Jma000019049
Chr13	Jr13_14610_p1	Sca5	Jma000019259
Chr13	Jr13_14850_p1	Sca5	Jma000020059
Chr13	Jr13_16070_p1	Sca5	Jma000019363
Chr13	Jr13_30130_p1	Sca5	Jma000028859
Chr13	Jr13_30630_p1	Sca5	Jma000028548
Chr13	Jr13_12290_p1	Sca6	Jma000016826
Chr13	Jr13_14610_p1	Sca6	Jma000016437
Chr13	Jr13_14850_p1	Sca6	Jma000016493
Chr13	Jr13_05050_p1	Sca6	Jma000016364
Chr13	Jr13_30130_p1	Sca6	Jma000009976
Chr14	Jr14_08090_p1	Sca10	Jma000003254
Chr14	Jr14_02960_p1	Sca13	Jma000005394
Chr14	Jr14_08090_p1	Sca13	Jma000005551
Chr14	Jr14_22100_p1	Sca13	Jma000017019
Chr14	Jr14_08090_p1	Sca14	Jma000022693
Chr15	Jr15_12660_p1	Sca16	Jma000013445
Chr16	Jr16_00890_p1	Sca11	Jma000026910
Chr16	Jr16_14290_p1	Sca11	Jma000023701
Chr16	Jr16_12390_p1	Sca3	Jma000018161
Chr16	Jr16_12390_p1	Sca4	Jma000028006
Chr16	Jr16_12390_p1	Sca5	Jma000020059
Chr16	Jr16_14290_p1	Sca5	Jma000019049
Chr16	Jr16_19690_p1	Sca5	Jma000019718
Chr16	Jr16_00890_p1	Sca5	Jma000028859
Chr16	Jr16_12390_p1	Sca6	Jma000016493
Chr16	Jr16_14290_p1	Sca6	Jma000016826
Chr16	Jr16_19690_p1	Sca6	Jma000016364
Chr16	Jr16_00890_p1	Sca6	Jma000009976
Chr01	Jr01_15550_p1	Jm2D	Jm2DG00122700	J. microcarpa
Chr01	Jr01_15790_p1	Jm2D	Jm2DG00123900
Chr01	Jr01_18750_p1	Jm2D	Jm2DG00143700
Chr01	Jr01_22930_p1	Jm2D	Jm2DG00177600
Chr01	Jr01_03150_p1	Jm2D	Jm2DG00019000
Chr01	Jr01_15550_p1	Jm2S	Jm2SG00079300
Chr01	Jr01_18750_p1	Jm2S	Jm2SG00104700
Chr01	Jr01_03150_p1	Jm2S	Jm2SG00012900
Chr01	Jr01_06810_p1	Jm3D	Jm3DG00094200
Chr01	Jr01_06810_p1	Jm3S	Jm3SG00108500
Chr01	Jr01_18750_p1	Jm5D	Jm5DG00088100
Chr01	Jr01_18750_p1	Jm5S	Jm5SG00069200
Chr01	Jr01_06810_p1	Jm6D	Jm6DG00005300
Chr02	Jr02_16420_p1	Jm1D	Jm1DG00072400
Chr02	Jr02_17180_p1	Jm1D	Jm1DG00064800
Chr02	Jr02_00640_p1	Jm3D	Jm3DG00094200
Chr02	Jr02_04990_p1	Jm3D	Jm3DG00122500
Chr02	Jr02_16420_p1	Jm6D	Jm6DG00125600
Chr02	Jr02_17180_p1	Jm6D	Jm6DG00131100
Chr02	Jr02_25520_p1	Jm6D	Jm6DG00183400
Chr02	Jr02_26760_p1	Jm6D	Jm6DG00192200
Chr02	Jr02_00640_p1	Jm6D	Jm6DG00005300
Chr02	Jr02_04990_p1	Jm6D	Jm6DG00039000
Chr02	Jr02_16420_p1	Jm6S	Jm6SG00082100
Chr02	Jr02_17180_p1	Jm6S	Jm6SG00086100
Chr02	Jr02_25520_p1	Jm6S	Jm6SG00122800
Chr03	Jr03_08810_p1	Jm5D	Jm5DG00068100
Chr03	Jr03_11540_p1	Jm5D	Jm5DG00088100
Chr03	Jr03_15160_p1	Jm5D	Jm5DG00114100
Chr03	Jr03_17800_p1	Jm5D	Jm5DG00128000
Chr03	Jr03_22520_p1	Jm5D	Jm5DG00170500
Chr03	Jr03_23890_p1	Jm5D	Jm5DG00179500
Chr03	Jr03_26460_p1	Jm5D	Jm5DG00198500
Chr03	Jr03_27180_p1	Jm5D	Jm5DG00203500
Chr03	Jr03_11540_p1	Jm5S	Jm5SG00069200
Chr03	Jr03_08810_p1	Jm5S	Jm5SG00057300
Chr03	Jr03_26460_p1	Jm5S	Jm5SG00160100
Chr03	Jr03_27180_p1	Jm5S	Jm5SG00162500
Chr03	Jr03_23890_p1	Jm5S	Jm5SG00150100
Chr03	Jr03_22520_p1	Jm5S	Jm5SG00143600
Chr03	Jr03_26460_p1	Jm7D	Jm7DG00062800
Chr04	Jr04_13770_p1	Jm5D	Jm5DG00088100
Chr04	Jr04_15560_p1	Jm5D	Jm5DG00068100
Chr04	Jr04_01100_p1	Jm5D	Jm5DG00198500
Chr04	Jr04_02750_p1	Jm5D	Jm5DG00179500
Chr04	Jr04_10710_p1	Jm5D	Jm5DG00114100
Chr04	Jr04_03890_p1	Jm5D	Jm5DG00170500
Chr04	Jr04_00640_p1	Jm5D	Jm5DG00203500
Chr04	Jr04_13770_p1	Jm5S	Jm5SG00069200
Chr04	Jr04_15560_p1	Jm5S	Jm5SG00057300
Chr04	Jr04_02750_p1	Jm5S	Jm5SG00150100
Chr04	Jr04_03890_p1	Jm5S	Jm5SG00143600
Chr04	Jr04_00640_p1	Jm5S	Jm5SG00162500
Chr04	Jr04_01100_p1	Jm5S	Jm5SG00160100
Chr04	Jr04_01100_p1	Jm7D	Jm7DG00062800
Chr05	Jr05_06670_p1	Jm7D	Jm7DG00062800
Chr05	Jr05_06670_p1	Jm7S	Jm7SG00050200
Chr06	Jr06_10200_p1	Jm8D	Jm8DG00080200
Chr07	Jr07_32310_p1	Jm1D	Jm1DG00235400
Chr07	Jr07_38970_p1	Jm1D	Jm1DG00277400
Chr07	Jr07_38980_p1	Jm1D	Jm1DG00277500
Chr07	Jr07_07490_p1	Jm1D	Jm1DG00064800
Chr07	Jr07_07550_p1	Jm1D	Jm1DG00065800
Chr07	Jr07_08410_p1	Jm1D	Jm1DG00072400
Chr07	Jr07_11780_p1	Jm1D	Jm1DG00103400
Chr07	Jr07_12950_p1	Jm1D	Jm1DG00095300
Chr07	Jr07_07490_p1	Jm1S	Jm1SG00036400
Chr07	Jr07_32310_p1	Jm1S	Jm1SG00153300
Chr07	Jr07_11780_p1	Jm1S	Jm1SG00085200
Chr07	Jr07_32310_p1	Jm4D	Jm4DG00211100
Chr07	Jr07_32310_p1	Jm4S	Jm4SG00005700
Chr07	Jr07_08410_p1	Jm6D	Jm6DG00125600
Chr07	Jr07_07490_p1	Jm6S	Jm6SG00086100
Chr07	Jr07_07550_p1	Jm6S	Jm6SG00086000
Chr08	Jr08_00860_p1	Jm4D	Jm4DG00211200
Chr08	Jr08_00870_p1	Jm4D	Jm4DG00211100
Chr08	Jr08_11260_p1	Jm4D	Jm4DG00123000
Chr08	Jr08_11410_p1	Jm4D	Jm4DG00121900
Chr08	Jr08_00860_p1	Jm4S	Jm4SG00005600
Chr08	Jr08_00870_p1	Jm4S	Jm4SG00005700
Chr08	Jr08_11260_p1	Jm4S	Jm4SG00083200
Chr08	Jr08_11410_p1	Jm4S	Jm4SG00084500
Chr08	Jr08_14560_p1	Jm4S	Jm4SG00107700
Chr09	Jr09_10570_p1	Jm1D	Jm1DG00065800
Chr09	Jr09_10580_p1	Jm1D	Jm1DG00064800
Chr09	Jr09_10580_p1	Jm3D	Jm3DG00232800
Chr09	Jr09_16000_p1	Jm6D	Jm6DG00183400
Chr09	Jr09_09980_p1	Jm6D	Jm6DG00125600
Chr09	Jr09_10580_p1	Jm6D	Jm6DG00131100
Chr09	Jr09_09980_p1	Jm6S	Jm6SG00082100
Chr09	Jr09_10570_p1	Jm6S	Jm6SG00086000
Chr09	Jr09_10580_p1	Jm6S	Jm6SG00086100
Chr09	Jr09_16000_p1	Jm6S	Jm6SG00122800
Chr09	Jr09_02120_p1	Jm6S	Jm6SG00025900
Chr10	Jr10_01810_p1	Jm2D	Jm2DG00019000
Chr10	Jr10_13870_p1	Jm2D	Jm2DG00143700
Chr10	Jr10_10930_p1	Jm2D	Jm2DG00122700
Chr10	Jr10_01810_p1	Jm2S	Jm2SG00012900
Chr10	Jr10_02340_p1	Jm2S	Jm2SG00017000
Chr10	Jr10_10930_p1	Jm2S	Jm2SG00079300
Chr10	Jr10_13870_p1	Jm2S	Jm2SG00104700
Chr10	Jr10_25600_p1	Jm2S	Jm2SG00189200
Chr10	Jr10_01810_p1	Jm3D	Jm3DG00113900
Chr10	Jr10_02340_p1	Jm3D	Jm3DG00122500
Chr10	Jr10_01810_p1	Jm3S	Jm3SG00095100
Chr10	Jr10_13870_p1	Jm5D	Jm5DG00088100
Chr10	Jr10_13870_p1	Jm5S	Jm5SG00069200
Chr11	Jr11_16150_p1	Jm4D	Jm4DG00121900
Chr11	Jr11_16330_p1	Jm4D	Jm4DG00123000
Chr11	Jr11_30170_p1	Jm4D	Jm4DG00211100
Chr11	Jr11_30180_p1	Jm4D	Jm4DG00211200
Chr11	Jr11_30170_p1	Jm4S	Jm4SG00005700
Chr11	Jr11_30180_p1	Jm4S	Jm4SG00005600
Chr11	Jr11_16150_p1	Jm4S	Jm4SG00084500
Chr11	Jr11_16330_p1	Jm4S	Jm4SG00083200
Chr12	Jr12_20670_p1	Jm1D	Jm1DG00235400
Chr12	Jr12_25170_p1	Jm1D	Jm1DG00277400
Chr12	Jr12_04410_p1	Jm1D	Jm1DG00064800
Chr12	Jr12_04430_p1	Jm1D	Jm1DG00065800
Chr12	Jr12_10150_p1	Jm1D	Jm1DG00103400
Chr12	Jr12_10150_p1	Jm1S	Jm1SG00085200
Chr12	Jr12_20670_p1	Jm1S	Jm1SG00153300
Chr12	Jr12_25170_p1	Jm1S	Jm1SG00183200
Chr12	Jr12_04410_p1	Jm1S	Jm1SG00036400
Chr12	Jr12_04430_p1	Jm1S	Jm1SG00036800
Chr12	Jr12_20670_p1	Jm4D	Jm4DG00211100
Chr12	Jr12_20670_p1	Jm4S	Jm4SG00005700
Chr12	Jr12_04410_p1	Jm6D	Jm6DG00131100
Chr12	Jr12_04410_p1	Jm6S	Jm6SG00086100
Chr12	Jr12_04430_p1	Jm6S	Jm6SG00086000
Chr13	Jr13_05050_p1	Jm3D	Jm3DG00038800
Chr13	Jr13_12290_p1	Jm3D	Jm3DG00094200
Chr13	Jr13_14610_p1	Jm3D	Jm3DG00112700
Chr13	Jr13_14850_p1	Jm3D	Jm3DG00113900
Chr13	Jr13_16070_p1	Jm3D	Jm3DG00122500
Chr13	Jr13_30130_p1	Jm3D	Jm3DG00229600
Chr13	Jr13_30630_p1	Jm3D	Jm3DG00232800
Chr13	Jr13_12290_p1	Jm3S	Jm3SG00108500
Chr13	Jr13_14610_p1	Jm3S	Jm3SG00096300
Chr13	Jr13_14850_p1	Jm3S	Jm3SG00095100
Chr13	Jr13_05050_p1	Jm3S	Jm3SG00142900
Chr13	Jr13_30130_p1	Jm3S	Jm3SG00007000
Chr13	Jr13_30630_p1	Jm6D	Jm6DG00131100
Chr13	Jr13_30130_p1	Jm6S	Jm6SG00082100
Chr13	Jr13_30630_p1	Jm6S	Jm6SG00086100
Chr14	Jr14_02960_p1	Jm7D	Jm7DG00022400
Chr14	Jr14_08090_p1	Jm7D	Jm7DG00062800
Chr14	Jr14_08090_p1	Jm7S	Jm7SG00050200
Chr15	Jr15_12660_p1	Jm8S	Jm8SG00101400
Chr16	Jr16_12390_p1	Jm2D	Jm2DG00019000
Chr16	Jr16_12390_p1	Jm2S	Jm2SG00012900
Chr16	Jr16_12390_p1	Jm3D	Jm3DG00113900
Chr16	Jr16_14290_p1	Jm3D	Jm3DG00094200
Chr16	Jr16_19690_p1	Jm3D	Jm3DG00038800
Chr16	Jr16_00890_p1	Jm3D	Jm3DG00229600
Chr16	Jr16_12390_p1	Jm3S	Jm3SG00095100
Chr16	Jr16_14290_p1	Jm3S	Jm3SG00108500
Chr16	Jr16_19690_p1	Jm3S	Jm3SG00142900
Chr16	Jr16_00890_p1	Jm3S	Jm3SG00007000
Chr16	Jr16_00890_p1	Jm6D	Jm6DG00125600
Chr16	Jr16_14290_p1	Jm6D	Jm6DG00005300
Chr01	Jr01_06810_p1	Sca01	Potri.001G058800.1	P. trichocarpa
Chr01	Jr01_06810_p1	Sca01	Potri.001G328000.1
Chr01	Jr01_18750_p1	Sca02	Potri.002G228400.2
Chr01	Jr01_06810_p1	Sca03	Potri.003G169100.1
Chr01	Jr01_15550_p1	Sca05	Potri.005G086400.1
Chr01	Jr01_15790_p1	Sca05	Potri.005G085200.1
Chr01	Jr01_15550_p1	Sca07	Potri.007G078200.1
Chr01	Jr01_15790_p1	Sca07	Potri.007G079800.1
Chr01	Jr01_03140_p1	Sca10	Potri.010G163000.1
Chr01	Jr01_18750_p1	Sca14	Potri.014G155100.1
Chr01	Jr01_03150_p1	Sca17	Potri.017G088300.2
Chr02	Jr02_16420_p1	Sca01	Potri.001G092900.1
Chr02	Jr02_17180_p1	Sca01	Potri.001G099000.1
Chr02	Jr02_25520_p1	Sca01	Potri.001G361600.2
Chr02	Jr02_26760_p1	Sca01	Potri.001G472800.1
Chr02	Jr02_16420_p1	Sca02	Potri.002G168700.1
Chr02	Jr02_16420_p1	Sca03	Potri.003G138600.1
Chr02	Jr02_17180_p1	Sca03	Potri.003G132700.1
Chr02	Jr02_26760_p1	Sca11	Potri.011G169300.1
Chr02	Jr02_25520_p1	Sca11	Potri.011G087900.1
Chr02	Jr02_00640_p1	Sca12	Potri.012G101000.1
Chr02	Jr02_16420_p1	Sca14	Potri.014G096200.1
Chr02	Jr02_00640_p1	Sca15	Potri.015G099200.1
Chr02	Jr02_04990_p1	Sca15	Potri.015G064100.1
Chr03	Jr03_17800_p1	Sca01	Potri.001G460600.1
Chr03	Jr03_15160_p1	Sca01	Potri.001G352400.1
Chr03	Jr03_08810_p1	Sca04	Potri.004G060900.1
Chr03	Jr03_11540_p1	Sca04	Potri.004G007500.1
Chr03	Jr03_23890_p1	Sca06	Potri.006G087000.1
Chr03	Jr03_26460_p1	Sca06	Potri.006G105300.1
Chr03	Jr03_27180_p1	Sca06	Potri.006G109100.1
Chr03	Jr03_22520_p1	Sca06	Potri.006G133200.1
Chr03	Jr03_08810_p1	Sca11	Potri.011G070100.1
Chr03	Jr03_11540_p1	Sca11	Potri.011G007800.2
Chr03	Jr03_15160_p1	Sca11	Potri.011G079300.1
Chr03	Jr03_17800_p1	Sca11	Potri.011G157100.1
Chr03	Jr03_11540_p1	Sca14	Potri.014G155100.1
Chr03	Jr03_23890_p1	Sca16	Potri.016G099900.1
Chr03	Jr03_26460_p1	Sca16	Potri.016G128300.1
Chr03	Jr03_27180_p1	Sca16	Potri.016G137900.1
Chr04	Jr04_10710_p1	Sca01	Potri.001G352400.1
Chr04	Jr04_13770_p1	Sca04	Potri.004G007500.1
Chr04	Jr04_15560_p1	Sca04	Potri.004G060400.1
Chr04	Jr04_00640_p1	Sca06	Potri.006G109100.1
Chr04	Jr04_01100_p1	Sca06	Potri.006G105300.1
Chr04	Jr04_03890_p1	Sca06	Potri.006G133200.1
Chr04	Jr04_02750_p1	Sca06	Potri.006G087000.1
Chr04	Jr04_15560_p1	Sca11	Potri.011G070100.1
Chr04	Jr04_13770_p1	Sca11	Potri.011G007800.2
Chr04	Jr04_10710_p1	Sca11	Potri.011G079300.1
Chr04	Jr04_00640_p1	Sca16	Potri.016G137900.1
Chr04	Jr04_01100_p1	Sca16	Potri.016G128300.1
Chr04	Jr04_02750_p1	Sca16	Potri.016G099900.1
Chr05	Jr05_06670_p1	Sca13	Potri.013G153400.1
Chr06	Jr06_10200_p1	Sca06	Potri.006G224100.1
Chr07	Jr07_32310_p1	Sca01	Potri.001G044500.1
Chr07	Jr07_08410_p1	Sca01	Potri.001G092900.1
Chr07	Jr07_07490_p1	Sca02	Potri.002G164400.1
Chr07	Jr07_07550_p1	Sca02	Potri.002G164900.1
Chr07	Jr07_08410_p1	Sca02	Potri.002G168700.1
Chr07	Jr07_32310_p1	Sca03	Potri.003G182200.1
Chr07	Jr07_08410_p1	Sca03	Potri.003G138600.1
Chr07	Jr07_11780_p1	Sca08	Potri.008G103300.1
Chr07	Jr07_11780_p1	Sca10	Potri.010G147700.1
Chr07	Jr07_38970_p1	Sca13	Potri.013G090400.1
Chr07	Jr07_38980_p1	Sca13	Potri.013G090300.1
Chr07	Jr07_07490_p1	Sca14	Potri.014G090300.1
Chr07	Jr07_07550_p1	Sca14	Potri.014G090700.1
Chr07	Jr07_08410_p1	Sca14	Potri.014G096200.1
Chr07	Jr07_38970_p1	Sca19	Potri.019G059300.1
Chr08	Jr08_11260_p1	Sca02	Potri.002G193000.1
Chr08	Jr08_11410_p1	Sca02	Potri.002G195300.1
Chr08	Jr08_00870_p1	Sca06	Potri.006G263600.1
Chr08	Jr08_14560_p1	Sca13	Potri.013G086000.1
Chr08	Jr08_11260_p1	Sca14	Potri.014G118200.1
Chr08	Jr08_11410_p1	Sca14	Potri.014G119800.1
Chr08	Jr08_00860_p1	Sca18	Potri.018G019700.1
Chr08	Jr08_00870_p1	Sca18	Potri.018G019800.1
Chr09	Jr09_09980_p1	Sca01	Potri.001G092900.1
Chr09	Jr09_16000_p1	Sca01	Potri.001G361600.2
Chr09	Jr09_09980_p1	Sca03	Potri.003G138600.1
Chr09	Jr09_10580_p1	Sca03	Potri.003G132700.1
Chr09	Jr09_02120_p1	Sca15	Potri.015G064100.1
Chr10	Jr10_04770_p1	Sca01	Potri.001G328000.1
Chr10	Jr10_04770_p1	Sca03	Potri.003G169100.1
Chr10	Jr10_10930_p1	Sca05	Potri.005G086400.1
Chr10	Jr10_11120_p1	Sca05	Potri.005G085200.1
Chr10	Jr10_10930_p1	Sca07	Potri.007G078200.1
Chr10	Jr10_11120_p1	Sca07	Potri.007G079800.1
Chr10	Jr10_25600_p1	Sca14	Potri.014G164300.1
Chr10	Jr10_13870_p1	Sca14	Potri.014G155100.1
Chr10	Jr10_01810_p1	Sca17	Potri.017G088300.2
Chr10	Jr10_02340_p1	Sca17	Potri.017G079500.1
Chr11	Jr11_16150_p1	Sca02	Potri.002G195300.1
Chr11	Jr11_16330_p1	Sca02	Potri.002G193000.1
Chr11	Jr11_30170_p1	Sca06	Potri.006G263600.1
Chr11	Jr11_16150_p1	Sca14	Potri.014G119800.1
Chr11	Jr11_16330_p1	Sca14	Potri.014G118200.1
Chr11	Jr11_30170_p1	Sca18	Potri.018G019800.1
Chr11	Jr11_30180_p1	Sca18	Potri.018G019700.1
Chr12	Jr12_20670_p1	Sca01	Potri.001G044500.1
Chr12	Jr12_04410_p1	Sca02	Potri.002G164400.1
Chr12	Jr12_04430_p1	Sca02	Potri.002G164900.1
Chr12	Jr12_20670_p1	Sca03	Potri.003G182200.1
Chr12	Jr12_10150_p1	Sca08	Potri.008G103300.1
Chr12	Jr12_10150_p1	Sca10	Potri.010G147700.1
Chr12	Jr12_04410_p1	Sca14	Potri.014G090300.1
Chr12	Jr12_04430_p1	Sca14	Potri.014G090700.1
Chr12	Jr12_25170_p1	Sca19	Potri.019G059300.1
Chr13	Jr13_05050_p1	Sca01	Potri.001G208600.1
Chr13	Jr13_12290_p1	Sca01	Potri.001G328000.1
Chr13	Jr13_12290_p1	Sca01	Potri.001G058800.1
Chr13	Jr13_30630_p1	Sca02	Potri.002G164400.2
Chr13	Jr13_12290_p1	Sca03	Potri.003G169100.1
Chr13	Jr13_30630_p1	Sca04	Potri.004G072000.1
Chr13	Jr13_14850_p1	Sca08	Potri.008G091900.1
Chr13	Jr13_14610_p1	Sca10	Potri.010G160100.1
Chr13	Jr13_14850_p1	Sca10	Potri.010G163000.1
Chr13	Jr13_30130_p1	Sca12	Potri.012G031700.1
Chr13	Jr13_30630_p1	Sca17	Potri.017G149000.1
Chr13	Jr13_14850_p1	Sca17	Potri.017G088300.2
Chr14	Jr14_22100_p1	Sca01	Potri.001G002400.2
Chr14	Jr14_02960_p1	Sca02	Potri.002G138900.1
Chr14	Jr14_22100_p1	Sca03	Potri.003G222500.1
Chr14	Jr14_08090_p1	Sca13	Potri.013G153400.1
Chr14	Jr14_02960_p1	Sca14	Potri.014G050000.1
Chr14	Jr14_08090_p1	Sca19	Potri.019G123500.1
Chr15	Jr15_12660_p1	Sca18	Potri.018G107000.1
Chr16	Jr16_14290_p1	Sca01	Potri.001G058800.1
Chr16	Jr16_19690_p1	Sca01	Potri.001G208600.1
Chr16	Jr16_14290_p1	Sca03	Potri.003G169100.1
Chr16	Jr16_12390_p1	Sca08	Potri.008G091900.1
Chr16	Jr16_12590_p1	Sca08	Potri.008G094000.1
Chr16	Jr16_12390_p1	Sca10	Potri.010G163000.1
Chr16	Jr16_00890_p1	Sca12	Potri.012G031700.1
Chr16	Jr16_12390_p1	Sca17	Potri.017G088300.2
Chr01	Jr01_06810_p1	Sca01	Qrob_P0738250.2	Q. robur
Chr01	Jr01_03150_p1	Sca02	Qrob_P0219690.2
Chr01	Jr01_18750_p1	Sca05	Qrob_P0474600.2
Chr01	Jr01_15550_p1	Sca07	Qrob_P0130410.2
Chr02	Jr02_25520_p1	Sca08	Qrob_P0288850.2
Chr03	Jr03_26460_p1	Sca01	Qrob_P0244170.2
Chr03	Jr03_08810_p1	Sca05	Qrob_P0524990.2
Chr03	Jr03_11540_p1	Sca05	Qrob_P0474600.2
Chr03	Jr03_22520_p1	Sca06	Qrob_P0706850.2
Chr04	Jr04_13770_p1	Sca05	Qrob_P0474600.2
Chr04	Jr04_15560_p1	Sca05	Qrob_P0524990.2
Chr04	Jr04_03890_p1	Sca06	Qrob_P0706850.2
Chr04	Jr04_13770_p1	Sca08	Qrob_P0656140.2
Chr05	Jr05_06670_p1	Sca01	Qrob_P0244170.2
Chr07	Jr07_38970_p1	Sca08	Qrob_P0457180.2
Chr08	Jr08_00860_p1	Sca02	Qrob_P0089800.2
Chr08	Jr08_11410_p1	Sca12	Qrob_P0602810.2
Chr09	Jr09_16000_p1	Sca08	Qrob_P0288850.2
Chr09	Jr09_09980_p1	Sca09	Qrob_P0321760.2
Chr10	Jr10_04770_p1	Sca01	Qrob_P0738250.2
Chr10	Jr10_01810_p1	Sca02	Qrob_P0219690.2
Chr10	Jr10_13870_p1	Sca05	Qrob_P0474600.2
Chr10	Jr10_10930_p1	Sca07	Qrob_P0130410.2
Chr11	Jr11_30170_p1	Sca02	Qrob_P0089800.2
Chr11	Jr11_16150_p1	Sca12	Qrob_P0602810.2
Chr12	Jr12_25170_p1	Sca08	Qrob_P0457180.2
Chr13	Jr13_14610_p1	Sca08	Qrob_P0002960.2
Chr13	Jr13_30130_p1	Sca09	Qrob_P0321760.2
Chr13	Jr13_05050_p1	Sca11	Qrob_P0436950.2
Chr14	Jr14_08090_p1	Sca01	Qrob_P0244170.2
Chr14	Jr14_02960_p1	Sca04	Qrob_P0382820.2
Chr15	Jr15_12660_p1	Sca02	Qrob_P0070920.2
Chr16	Jr16_00890_p1	Sca09	Qrob_P0321760.2
Chr16	Jr16_19690_p1	Sca11	Qrob_P0436950.2
