# Supplementary material for: Genome-Wide Identification and Transcriptional Expression Profiles of Transcription Factor WRKY in Common Walnut (Juglans regia L.)
Source: Genes (Basel). 2021 Sep 19;12(9):1444. doi: 10.3390/genes12091444 (PMC8466090; doi:10.3390/genes12091444)
Supplement: Supplementary file 1 [file genes-12-01444-s001.zip › TableS8.xlsx]

## Sheet: Sheet1
TableS8. The KEGG enrichment analysis of three groups (Dioscaryon, J. mandshurica, and Rhysocaryon) of Juglans genomes.
Pathway term	Pathway description	Gene ratio	BgRatio	Pvalue	P.adjust value	Qvalue	NCBI gene id	Count	Type
GO:0008037	cell recognition	53/775	117/9814	3.98695e-28	2.47191e-26	2.26627e-26	LOC108998384/LOC108989345/LOC108989291/LOC109015167/LOC109017340/LOC109013452/LOC108999067/LOC109013535/LOC109014153/LOC108983469/LOC109020451/LOC109014161/LOC109010604/LOC108979441/LOC108991978/LOC108979384/LOC109014127/LOC109006519/LOC109006515/LOC108985198/LOC108984766/LOC108991093/LOC108983465/LOC108991977/LOC108999069/LOC108991976/LOC108981087/LOC109000305/LOC108983466/LOC109006514/LOC109006…	53	GO
GO:0009875	pollen-pistil interaction	53/775	117/9814	3.98695e-28	2.47191e-26	2.26627e-26	LOC108998384/LOC108989345/LOC108989291/LOC109015167/LOC109017340/LOC109013452/LOC108999067/LOC109013535/LOC109014153/LOC108983469/LOC109020451/LOC109014161/LOC109010604/LOC108979441/LOC108991978/LOC108979384/LOC109014127/LOC109006519/LOC109006515/LOC108985198/LOC108984766/LOC108991093/LOC108983465/LOC108991977/LOC108999069/LOC108991976/LOC108981087/LOC109000305/LOC108983466/LOC109006514/LOC109006…	53
GO:0048544	recognition of pollen	53/775	117/9814	3.98695e-28	2.47191e-26	2.26627e-26	LOC108998384/LOC108989345/LOC108989291/LOC109015167/LOC109017340/LOC109013452/LOC108999067/LOC109013535/LOC109014153/LOC108983469/LOC109020451/LOC109014161/LOC109010604/LOC108979441/LOC108991978/LOC108979384/LOC109014127/LOC109006519/LOC109006515/LOC108985198/LOC108984766/LOC108991093/LOC108983465/LOC108991977/LOC108999069/LOC108991976/LOC108981087/LOC109000305/LOC108983466/LOC109006514/LOC109006…	53
GO:0009856	pollination	53/775	119/9814	1.1216e-27	4.17234e-26	3.82523e-26	LOC108998384/LOC108989345/LOC108989291/LOC109015167/LOC109017340/LOC109013452/LOC108999067/LOC109013535/LOC109014153/LOC108983469/LOC109020451/LOC109014161/LOC109010604/LOC108979441/LOC108991978/LOC108979384/LOC109014127/LOC109006519/LOC109006515/LOC108985198/LOC108984766/LOC108991093/LOC108983465/LOC108991977/LOC108999069/LOC108991976/LOC108981087/LOC109000305/LOC108983466/LOC109006514/LOC109006…	53
GO:0044706	multi-multicellular organism process	53/775	119/9814	1.1216e-27	4.17234e-26	3.82523e-26	LOC108998384/LOC108989345/LOC108989291/LOC109015167/LOC109017340/LOC109013452/LOC108999067/LOC109013535/LOC109014153/LOC108983469/LOC109020451/LOC109014161/LOC109010604/LOC108979441/LOC108991978/LOC108979384/LOC109014127/LOC109006519/LOC109006515/LOC108985198/LOC108984766/LOC108991093/LOC108983465/LOC108991977/LOC108999069/LOC108991976/LOC108981087/LOC109000305/LOC108983466/LOC109006514/LOC109006…	53
GO:0051704	multi-organism process	54/775	163/9814	8.04422e-21	2.49371e-19	2.28625e-19	LOC108998384/LOC109018967/LOC108989345/LOC108989291/LOC109015167/LOC109017340/LOC109013452/LOC108999067/LOC109013535/LOC109014153/LOC108983469/LOC109020451/LOC109014161/LOC109010604/LOC108979441/LOC108991978/LOC108979384/LOC109014127/LOC109006519/LOC109006515/LOC108985198/LOC108984766/LOC108991093/LOC108983465/LOC108991977/LOC108999069/LOC108991976/LOC108981087/LOC109000305/LOC108983466/LOC109006…	54
GO:0010274	hydrotropism	17/775	17/9814	1.53465e-19	4.07778e-18	3.73855e-18	LOC109017785/LOC108988458/LOC108997274/LOC108989321/LOC109012816/LOC108987410/LOC109013318/LOC109000518/LOC109015358/LOC108992306/LOC109010308/LOC109007736/LOC109006090/LOC108988612/LOC108983106/LOC108998248/LOC109004587	17
GO:0000003	reproduction	54/775	205/9814	7.50391e-16	1.55081e-14	1.42179e-14	LOC108998384/LOC108991491/LOC108989345/LOC108989291/LOC109015167/LOC109017340/LOC109013452/LOC108999067/LOC109013535/LOC109014153/LOC108983469/LOC109020451/LOC109014161/LOC109010604/LOC108979441/LOC108991978/LOC108979384/LOC109014127/LOC109006519/LOC109006515/LOC108985198/LOC108984766/LOC108991093/LOC108983465/LOC108991977/LOC108999069/LOC108991976/LOC108981087/LOC109000305/LOC108983466/LOC109006…	54
GO:0022414	reproductive process	54/775	205/9814	7.50391e-16	1.55081e-14	1.42179e-14	LOC108998384/LOC108991491/LOC108989345/LOC108989291/LOC109015167/LOC109017340/LOC109013452/LOC108999067/LOC109013535/LOC109014153/LOC108983469/LOC109020451/LOC109014161/LOC109010604/LOC108979441/LOC108991978/LOC108979384/LOC109014127/LOC109006519/LOC109006515/LOC108985198/LOC108984766/LOC108991093/LOC108983465/LOC108991977/LOC108999069/LOC108991976/LOC108981087/LOC109000305/LOC108983466/LOC109006…	54
GO:0006887	exocytosis	31/775	74/9814	9.36285e-16	1.74149e-14	1.59661e-14	LOC109002167/LOC108987561/LOC108999577/LOC109019894/LOC109013593/LOC108994376/LOC108984356/LOC109001964/LOC109004960/LOC109001321/LOC108988083/LOC108986448/LOC108996940/LOC108994196/LOC109018497/LOC109018463/LOC108990989/LOC109015471/LOC108979200/LOC109019343/LOC108988422/LOC109006377/LOC108996488/LOC109000624/LOC109009562/LOC109003017/LOC108988737/LOC109008069/LOC108982159/LOC108984613/LOC109017…	31
GO:0032940	secretion by cell	31/775	75/9814	1.4783e-15	2.49967e-14	2.29172e-14	LOC109002167/LOC108987561/LOC108999577/LOC109019894/LOC109013593/LOC108994376/LOC108984356/LOC109001964/LOC109004960/LOC109001321/LOC108988083/LOC108986448/LOC108996940/LOC108994196/LOC109018497/LOC109018463/LOC108990989/LOC109015471/LOC108979200/LOC109019343/LOC108988422/LOC109006377/LOC108996488/LOC109000624/LOC109009562/LOC109003017/LOC108988737/LOC109008069/LOC108982159/LOC108984613/LOC109017…	31
GO:0046903	secretion	31/775	82/9814	2.84021e-14	4.40232e-13	4.03608e-13	LOC109002167/LOC108987561/LOC108999577/LOC109019894/LOC109013593/LOC108994376/LOC108984356/LOC109001964/LOC109004960/LOC109001321/LOC108988083/LOC108986448/LOC108996940/LOC108994196/LOC109018497/LOC109018463/LOC108990989/LOC109015471/LOC108979200/LOC109019343/LOC108988422/LOC109006377/LOC108996488/LOC109000624/LOC109009562/LOC109003017/LOC108988737/LOC109008069/LOC108982159/LOC108984613/LOC109017…	31
GO:0045454	cell redox homeostasis	44/775	160/9814	7.37874e-14	1.05573e-12	9.679e-13	LOC109008213/LOC109008236/LOC109005959/LOC108997992/LOC109008240/LOC108994974/LOC108994978/LOC109008241/LOC109006467/LOC109005958/LOC109008239/LOC108997993/LOC109001269/LOC109018515/LOC109001874/LOC109004774/LOC108984360/LOC109011102/LOC109020507/LOC109007255/LOC109008871/LOC108991462/LOC109007257/LOC109012665/LOC109003876/LOC109008005/LOC109015418/LOC108984718/LOC108996726/LOC108979812/LOC109009…	44
GO:0032501	multicellular organismal process	62/775	286/9814	1.00424e-13	1.3342e-12	1.22321e-12	LOC108992395/LOC109002462/LOC108988543/LOC108998384/LOC108988007/LOC109008623/LOC109001533/LOC108989345/LOC108989291/LOC109015167/LOC109017340/LOC109013452/LOC108999067/LOC109013535/LOC109014153/LOC108983469/LOC109020451/LOC109014161/LOC109010604/LOC108979441/LOC108991978/LOC108979384/LOC109014127/LOC109006519/LOC109006515/LOC108985198/LOC108984766/LOC108991093/LOC108983465/LOC108991977/LOC108999…	62
GO:0019725	cellular homeostasis	44/775	213/9814	2.17387e-09	2.6956e-08	2.47135e-08	LOC109008213/LOC109008236/LOC109005959/LOC108997992/LOC109008240/LOC108994974/LOC108994978/LOC109008241/LOC109006467/LOC109005958/LOC109008239/LOC108997993/LOC109001269/LOC109018515/LOC109001874/LOC109004774/LOC108984360/LOC109011102/LOC109020507/LOC109007255/LOC109008871/LOC108991462/LOC109007257/LOC109012665/LOC109003876/LOC109008005/LOC109015418/LOC108984718/LOC108996726/LOC108979812/LOC109009…	44
GO:0009408	response to heat	12/775	20/9814	3.77375e-09	4.38699e-08	4.02203e-08	LOC109022023/LOC108979711/LOC109001640/LOC109013923/LOC108984757/LOC109001510/LOC108982260/LOC109014599/LOC108979498/LOC108979500/LOC109014600/LOC108982261	12
GO:0009606	tropism	18/775	48/9814	8.91301e-09	9.75189e-08	8.94061e-08	LOC109017785/LOC108988458/LOC108997274/LOC108989321/LOC109012816/LOC108987410/LOC109013318/LOC109000518/LOC109015358/LOC108992306/LOC109010308/LOC109007736/LOC109006090/LOC108988612/LOC108983106/LOC108998248/LOC109004587/LOC108984558	18
GO:0009266	response to temperature stimulus	12/775	24/9814	6.01865e-08	6.21927e-07	5.70187e-07	LOC109022023/LOC108979711/LOC109001640/LOC109013923/LOC108984757/LOC109001510/LOC108982260/LOC109014599/LOC108979498/LOC108979500/LOC109014600/LOC108982261	12
GO:0006869	lipid transport	24/775	91/9814	8.89447e-08	8.70722e-07	7.98285e-07	LOC108996231/LOC108982955/LOC108984676/LOC109005297/LOC108981912/LOC109017960/LOC108980987/LOC108981907/LOC108981911/LOC108984632/LOC108981913/LOC108986295/LOC108986273/LOC108986272/LOC108985912/LOC108993793/LOC108998672/LOC108996957/LOC109020000/LOC108982522/LOC108996977/LOC109003396/LOC109000348/LOC109005794	24
GO:0010876	lipid localization	24/775	94/9814	1.73312e-07	1.6118e-06	1.47771e-06	LOC108996231/LOC108982955/LOC108984676/LOC109005297/LOC108981912/LOC109017960/LOC108980987/LOC108981907/LOC108981911/LOC108984632/LOC108981913/LOC108986295/LOC108986273/LOC108986272/LOC108985912/LOC108993793/LOC108998672/LOC108996957/LOC109020000/LOC108982522/LOC108996977/LOC109003396/LOC109000348/LOC109005794	24
GO:0000145	exocyst	31/1418	55/12774	3.26134e-16	4.15821e-15	3.43299e-15	LOC109002167/LOC108987561/LOC108999577/LOC109019894/LOC109013593/LOC108994376/LOC108984356/LOC109001964/LOC109004960/LOC109001321/LOC108988083/LOC108986448/LOC108996940/LOC108994196/LOC109018497/LOC109018463/LOC108990989/LOC109015471/LOC108979200/LOC109019343/LOC108988422/LOC109006377/LOC108996488/LOC109000624/LOC109009562/LOC109003017/LOC108988737/LOC109008069/LOC108982159/LOC108984613/LOC109017…	31
GO:0005938	cell cortex	31/1418	55/12774	3.26134e-16	4.15821e-15	3.43299e-15	LOC109002167/LOC108987561/LOC108999577/LOC109019894/LOC109013593/LOC108994376/LOC108984356/LOC109001964/LOC109004960/LOC109001321/LOC108988083/LOC108986448/LOC108996940/LOC108994196/LOC109018497/LOC109018463/LOC108990989/LOC109015471/LOC108979200/LOC109019343/LOC108988422/LOC109006377/LOC108996488/LOC109000624/LOC109009562/LOC109003017/LOC108988737/LOC109008069/LOC108982159/LOC108984613/LOC109017…	31
GO:0044448	cell cortex part	31/1418	55/12774	3.26134e-16	4.15821e-15	3.43299e-15	LOC109002167/LOC108987561/LOC108999577/LOC109019894/LOC109013593/LOC108994376/LOC108984356/LOC109001964/LOC109004960/LOC109001321/LOC108988083/LOC108986448/LOC108996940/LOC108994196/LOC109018497/LOC109018463/LOC108990989/LOC109015471/LOC108979200/LOC109019343/LOC108988422/LOC109006377/LOC108996488/LOC109000624/LOC109009562/LOC109003017/LOC108988737/LOC109008069/LOC108982159/LOC108984613/LOC109017…	31
GO:0099568	cytoplasmic region	31/1418	55/12774	3.26134e-16	4.15821e-15	3.43299e-15	LOC109002167/LOC108987561/LOC108999577/LOC109019894/LOC109013593/LOC108994376/LOC108984356/LOC109001964/LOC109004960/LOC109001321/LOC108988083/LOC108986448/LOC108996940/LOC108994196/LOC109018497/LOC109018463/LOC108990989/LOC109015471/LOC108979200/LOC109019343/LOC108988422/LOC109006377/LOC108996488/LOC109000624/LOC109009562/LOC109003017/LOC108988737/LOC109008069/LOC108982159/LOC108984613/LOC109017…	31
GO:0031012	extracellular matrix	16/1418	16/12774	4.92928e-16	5.02786e-15	4.15097e-15	LOC108999203/LOC108999152/LOC108999108/LOC108980733/LOC108981328/LOC108980714/LOC108991192/LOC108984975/LOC108989846/LOC109015419/LOC108984976/LOC108988008/LOC108994289/LOC108989922/LOC109014958/LOC108987981	16
GO:0099023	tethering complex	32/1418	79/12774	1.44902e-11	1.23166e-10	1.01685e-10	LOC108995769/LOC109002167/LOC108987561/LOC108999577/LOC109019894/LOC109013593/LOC108994376/LOC108984356/LOC109001964/LOC109004960/LOC109001321/LOC108988083/LOC108986448/LOC108996940/LOC108994196/LOC109018497/LOC109018463/LOC108990989/LOC109015471/LOC108979200/LOC109019343/LOC108988422/LOC109006377/LOC108996488/LOC109000624/LOC109009562/LOC109003017/LOC108988737/LOC109008069/LOC108982159/LOC108984…	32
GO:0044421	extracellular region part	16/1418	22/12774	1.91144e-11	1.39262e-10	1.14974e-10	LOC108999203/LOC108999152/LOC108999108/LOC108980733/LOC108981328/LOC108980714/LOC108991192/LOC108984975/LOC108989846/LOC109015419/LOC108984976/LOC108988008/LOC108994289/LOC108989922/LOC109014958/LOC108987981	16
GO:0000152	nuclear ubiquitin ligase complex	7/1418	14/12774	0.000346512	0.00196357	0.00162111	LOC109005876/LOC109003554/LOC109014716/LOC109017909/LOC109005258/LOC109018736/LOC109016305	7
GO:0005680	anaphase-promoting complex	7/1418	14/12774	0.000346512	0.00196357	0.00162111	LOC109005876/LOC109003554/LOC109014716/LOC109017909/LOC109005258/LOC109018736/LOC109016305	7
GO:0000151	ubiquitin ligase complex	8/1418	24/12774	0.00324822	0.0165659	0.0136767	LOC109008623/LOC109005876/LOC109003554/LOC109014716/LOC109017909/LOC109005258/LOC109018736/LOC109016305	8
GO:0031461	cullin-RING ubiquitin ligase complex	7/1418	21/12774	0.00583836	0.0270687	0.0223478	LOC109005876/LOC109003554/LOC109014716/LOC109017909/LOC109005258/LOC109018736/LOC109016305	7
GO:0000786	nucleosome	10/1418	62/12774	0.144753	0.615202	0.507907	LOC109021738/LOC109021742/LOC109002633/LOC109006786/LOC109007017/LOC108993974/LOC109016888/LOC108999018/LOC108993012/LOC108996491	10
GO:0044815	DNA packaging complex	10/1418	65/12774	0.179838	0.700644	0.578447	LOC109021738/LOC109021742/LOC109002633/LOC109006786/LOC109007017/LOC108993974/LOC109016888/LOC108999018/LOC108993012/LOC108996491	10
GO:0032993	protein-DNA complex	10/1418	66/12774	0.192334	0.700644	0.578447	LOC109021738/LOC109021742/LOC109002633/LOC109006786/LOC109007017/LOC108993974/LOC109016888/LOC108999018/LOC108993012/LOC108996491	10
GO:0000785	chromatin	10/1418	83/12774	0.442304	1	0.825593	LOC109021738/LOC109021742/LOC109002633/LOC109006786/LOC109007017/LOC108993974/LOC109016888/LOC108999018/LOC108993012/LOC108996491	10
GO:0005811	lipid droplet	2/1418	22/12774	0.718765	1	0.825593	LOC108989535/LOC108993143	2
GO:0000775	chromosome, centromeric region	1/1418	13/12774	0.783554	1	0.825593	LOC108991491	1
GO:0005815	microtubule organizing center	1/1418	13/12774	0.783554	1	0.825593	LOC108992361	1
GO:0016459	myosin complex	1/1418	14/12774	0.807606	1	0.825593	LOC109000365	1
GO:0005819	spindle	1/1418	17/12774	0.864887	1	0.825593	LOC108992361	1
GO:0001871	pattern binding	1/1418	129/20269	0.00779803	0.135553	0.091535	LOC109011453/LOC109018797	2
GO:0030247	polysaccharide binding	1/1418	129/20269	0.00779803	0.135553	0.091535	LOC109011453/LOC109018797	2
GO:0010427	abscisic acid binding	1/1418	17/20269	0.0174747	0.135553	0.091535	LOC108984928	1
GO:0019840	isoprenoid binding	1/1418	17/20269	0.0174747	0.135553	0.091535	LOC108984928	1
GO:0043178	alcohol binding	1/1418	17/20269	0.0174747	0.135553	0.091535	LOC108984928	1
GO:0005315	inorganic phosphate transmembrane transporter activity	1/1418	18/20269	0.0184935	0.135553	0.091535	LOC108995914	1
GO:0042562	hormone binding	1/1418	22/20269	0.0225587	0.135553	0.091535	LOC108984928	1
GO:0004864	protein phosphatase inhibitor activity	1/1418	23/20269	0.0235725	0.135553	0.091535	LOC108984928	1
GO:0019212	phosphatase inhibitor activity	1/1418	23/20269	0.0235725	0.135553	0.091535	LOC108984928	1
GO:0033293	monocarboxylic acid binding	1/1418	26/20269	0.0266079	0.135553	0.091535	LOC108984928	1
GO:0015276	ligand-gated ion channel activity	1/1418	37/20269	0.0376609	0.135553	0.091535	LOC109021235	1
GO:0022834	ligand-gated channel activity	1/1418	37/20269	0.0376609	0.135553	0.091535	LOC109021235	1
GO:0038023	signaling receptor activity	1/1418	41/20269	0.0416505	0.135553	0.091535	LOC108984928	1
GO:0060089	molecular transducer activity	1/1418	41/20269	0.0416505	0.135553	0.091535	LOC108984928	1
GO:0003680	AT DNA binding	1/1418	44/20269	0.0446323	0.135553	0.091535	LOC108989505	1
GO:0019888	protein phosphatase regulator activity	1/1418	45/20269	0.0456243	0.135553	0.091535	LOC108984928	1
GO:0019208	phosphatase regulator activity	1/1418	47/20269	0.0476053	0.135553	0.091535	LOC108984928	1
GO:0031406	carboxylic acid binding	1/1418	48/20269	0.0485943	0.135553	0.091535	LOC108984928	1
GO:0043177	organic acid binding	1/1418	48/20269	0.0485943	0.135553	0.091535	LOC108984928	1
GO:0016702	oxidoreductase activity, acting on single donors with incorporation of molecular oxygen, incorporation of two atoms of oxygen	1/1418	55/20269	0.0554902	0.147049	0.0992983	LOC108988447	1
ko:04626	Plant-pathogen interaction	1/1418	302/6454	8.92153e-17	1.78431e-16	2.26627e-26	108983872/108986136/108987205/108987784/108994063/108995192/108996946/108997338/108998106/109006404/109006899/109010840	12	KEGG
ko:04016	jreK signaling pathway - plant	1/1418	239/6454	2.25547e-11	2.25547e-11	2.26627e-26	108983872/108987784/108995192/108996946/108997338/108998106/109006404/109006899/109010840	9
