# Supplementary material for: Genome-Wide Identification and Transcriptional Expression Profiles of Transcription Factor WRKY in Common Walnut (Juglans regia L.)
Source: Genes (Basel). 2021 Sep 19;12(9):1444. doi: 10.3390/genes12091444 (PMC8466090; doi:10.3390/genes12091444)
Supplement: Supplementary file 1 [file genes-12-01444-s001.zip › TableS9.xlsx]

## Sheet: Sheet1
TableS9. The WRKY genes expression level in different tissues of J. regia.
geneid	CE5	CK3	EM8	HC2	HL1	HL6	HP3	HU3	IF6	RT6	SE7	VB5	LY2	LY7	LE5	FL3	FL6
JrWRKY1	15.3806	15.5252	2.82341	9.07414	9.69621	7.36173	21.6228	25.4325	7.38258	12.1211	11.7118	10.3014	16.9882	16.9882	17.2739	8.66017	8.57017
JrWRKY2	15.3806	15.5252	2.82341	9.07414	9.69621	7.36173	21.6228	25.4325	7.38258	12.1211	11.7118	10.3014	16.9882	16.9882	17.2739	8.66017	8.57017
JrWRKY3	0	0	0	0	0	0	0	0	0	0	0	0	0	0	0	0	0
JrWRKY4	0.528745	0	0	0	0	0	0	0.188777	0	9.6953	0	0	0	0	0.175572	0	0
JrWRKY5	1.28308	0.180138	0	0	1.26514	0.57728	0.15556	0.361681	0.846304	8.8982	0.724324	2.18114	0.637288	0.637288	0.331858	6.40543	6.31543
JrWRKY6	0.0831251	1.76324	0.620629	0.383412	1.27858	0.917784	2.52565	2.42861	0.994765	0.333701	0.782364	2.20633	2.28566	2.28566	3.63105	1.79746	1.70746
JrWRKY7	0.0831251	1.76324	0.620629	0.383412	1.27858	0.917784	2.52565	2.42861	0.994765	0.333701	0.782364	2.20633	2.28566	2.28566	3.63105	1.79746	1.70746
JrWRKY8	26.2064	45.3659	0	1.2006	0	0.1364	0.782204	2.68079	0.11014	31.5029	7.73425	1.17945	2.57625	2.57625	1.61861	2.9074	2.8174
JrWRKY9	9.84304	0.0965557	0	2.99889	0.313043	0.258666	3.93142	0.928917	0.331428	1.15376	0.131095	0.295875	0.173273	0.173273	0.180708	0.619729	0.529729
JrWRKY10	24.4301	0	0	7.04098	5.28846	3.31418	6.77331	42.0843	2.11277	3.82016	0	0.646436	0.564547	0.564547	0.195536	2.36299	2.27299
JrWRKY11	6.46347	0.218105	0	0	0	0	0.823867	0.335416	0	7.50825	0.119431	0.0449059	0.0395028	0.0395028	0	0	0
JrWRKY12	5.71558	1.03383	0	4.04224	7.65604	2.90266	10.1882	0.604428	3.34583	22.7634	1.73214	3.90883	5.29599	5.29599	3.53387	1.67904	1.58904
JrWRKY13	20.1952	0	0	0.235207	0.250434	0.0646665	13.3326	0.0663512	0.198857	29.7093	0.786568	0.3945	0.606457	0.606457	0.421651	0.708262	0.618262
JrWRKY14	20.1952	0	0	0.235207	0.250434	0.0646665	13.3326	0.0663512	0.198857	29.7093	0.786568	0.3945	0.606457	0.606457	0.421651	0.708262	0.618262
JrWRKY15	4.76983	8.12425	5.25472	6.52055	12.7431	12.1205	7.42408	6.18896	11.5893	6.7186	11.2404	10.2577	14.1745	14.1745	16.1976	12.6705	12.5805
JrWRKY16	4.76983	8.12425	5.25472	6.52055	12.7431	12.1205	7.42408	6.18896	11.5893	6.7186	11.2404	10.2577	14.1745	14.1745	16.1976	12.6705	12.5805
JrWRKY17	13.9263	18.1381	4.78965	7.36091	13.4631	12.7745	8.58485	17.2097	11.9443	20.14	16.3773	17.7398	23.6625	23.6625	23.1622	23.765	23.675
JrWRKY18	24.1518	9.41874	0.416917	1.83645	2.64874	2.266	20.2132	6.03793	2.88574	41.8651	74.8669	2.02177	3.31211	3.31211	4.27408	10.0712	9.9812
JrWRKY19	62.6057	18.8234	1.55264	9.27961	7.02832	5.01236	60.7185	74.1778	4.12997	105.101	39.3362	13.7657	17.3216	17.3216	15.763	8.56132	8.47132
JrWRKY20	62.6057	18.8234	1.55264	9.27961	7.02832	5.01236	60.7185	74.1778	4.12997	105.101	39.3362	13.7657	17.3216	17.3216	15.763	8.56132	8.47132
JrWRKY21	20.456	0.706274	0	2.96507	0.516003	0.415737	2.50681	3.89302	0.425213	6.51041	2.16034	2.34744	2.14188	2.14188	0.992928	1.94385	1.85385
JrWRKY22	0.513603	0.940603	0.254007	0.543734	24.2621	13.6639	0.947337	0.695169	11.2958	6.75583	6.26243	3.74377	0.106193	0.106193	0.221639	42.3141	42.2241
JrWRKY23	23.929	11.9821	1.08009	9.34819	30.0489	23.4025	22.5195	16.5328	28.0003	31.8843	2.42558	28.7882	41.6091	41.6091	48.9353	44.7314	44.6414
JrWRKY24	0.148816	0.0848241	0	0	0	0	0	0	0.350516	0.338231	0	0.0867919	1.75411	1.75411	1.32589	0.155675	0.065675
JrWRKY25	1.67147	0.228225	0	0.537093	0.358569	0.188582	3.73345	0	1.01689	4.56694	4.12279	0.234877	2.64455	2.64455	1.12141	0.419969	0.329969
JrWRKY26	8.59568	15.299	0	2.09749	2.22527	1.40119	5.77551	0.098599	0.885454	9.30436	0.969948	21.0113	52.2667	52.2667	48.8896	25.4242	25.3342
JrWRKY27	25.1862	5.2524	0	2.94162	7.27026	4.4679	10.2812	0.423757	2.61136	37.3065	11.4545	12.086	23.8148	23.8148	17.9035	15.7631	15.6731
JrWRKY28	25.1862	5.2524	0	2.94162	7.27026	4.4679	10.2812	0.423757	2.61136	37.3065	11.4545	12.086	23.8148	23.8148	17.9035	15.7631	15.6731
JrWRKY29	4.06606	1.86514	0.202507	6.26428	8.88099	4.84559	22.0385	1.88864	4.38125	23.8843	6.44406	3.88642	15.7843	15.7843	9.42711	2.23074	2.14074
JrWRKY30	0	0.100595	0	0	0	0	0	0	0.0689822	0	0.136493	0.821517	3.42751	3.42751	1.25415	0.461056	0.371056
JrWRKY31	4.8691	8.30802	0	4.68053	21.3127	20.0067	9.24329	7.02703	33.3682	16.8878	0.685679	26.8726	38.3447	38.3447	40.6659	54.6505	54.5605
JrWRKY32	4.8691	8.30802	0	4.68053	21.3127	20.0067	9.24329	7.02703	33.3682	16.8878	0.685679	26.8726	38.3447	38.3447	40.6659	54.6505	54.5605
JrWRKY33	23.4789	0.0897487	0	0.109557	3.78747	1.56854	0.716422	0.0618083	1.48146	1.78851	0.121982	0	0.161248	0.161248	0	0.0823293	0.0076707
JrWRKY34	9.81824	9.00441	0	0.0264548	0	0.0883002	0.345527	0.0895207	0.0297346	10.592	0.233716	1.75752	2.04857	2.04857	1.5063	1.37452	1.28452
JrWRKY35	1.57251	0	0	0	0	0.167619	0	0	0	45.0889	5.84404	0	0	0	0	0.23278	0.14278
JrWRKY36	1.57251	0	0	0	0	0.167619	0	0	0	45.0889	5.84404	0	0	0	0	0.23278	0.14278
JrWRKY37	30.1567	8.45498	1.74426	5.72387	3.0668	1.67405	27.2604	39.7084	1.20822	24.1256	32.4101	12.9896	20.8116	20.8116	11.9687	8.85772	8.76772
JrWRKY38	2.02922	0.841611	0	1.28926	0.351755	1.36781	15.064	0	0.550088	3.29277	1.85158	1.39498	3.17113	3.17113	2.02917	4.31909	4.22909
JrWRKY39	2.02922	0.841611	0	1.28926	0.351755	1.36781	15.064	0	0.550088	3.29277	1.85158	1.39498	3.17113	3.17113	2.02917	4.31909	4.22909
JrWRKY40	2.09173	1.36253	0.818786	0.520546	0.332014	0.286923	7.71473	0.939731	0.645081	6.62124	2.54814	1.48119	9.18734	9.18734	3.56714	1.01585	0.92585
JrWRKY41	2.0106	16.7284	0	0	0	0	0	0	0	3.52546	0	0.378877	0	0	0.230508	0	0
JrWRKY42	15.7527	4.0558	0	1.99677	58.2997	32.628	42.5217	0.329688	18.7586	80.3461	3.24776	16.7754	71.7821	71.7821	53.3068	21.4625	21.3725
JrWRKY43	31.854	13.8536	0.381269	32.3533	11.7225	6.06922	75.9527	39.5218	6.3938	41.9469	52.2385	7.76816	9.23409	9.23409	8.20766	7.21524	7.12524
JrWRKY44	18.9535	0.622258	0	0.296216	0.219251	0.131677	6.66409	1.03582	0	8.37926	18.3353	0.590938	0.649721	0.649721	0.512384	0.748573	0.658573
JrWRKY45	30.0718	6.63275	0.204455	9.71911	27.3653	7.21214	63.1419	52.3239	12.8038	22.1121	42.6804	11.0958	62.3648	62.3648	42.7609	5.81738	5.72738
JrWRKY46	0.254221	0	0	0	0	0	0	0	0	0.724453	0	0	0.13081	0.13081	0.0454926	0	0
JrWRKY47	10.0128	1.06211	0	0.705622	1.25217	0.840664	1.11105	0	0.463999	9.71081	1.04876	5.72025	15.6812	15.6812	11.3846	4.8693	4.7793
JrWRKY48	10.0128	1.06211	0	0.705622	1.25217	0.840664	1.11105	0	0.463999	9.71081	1.04876	5.72025	15.6812	15.6812	11.3846	4.8693	4.7793
JrWRKY49	3.52542	0.426749	0.445316	0	0.182917	0	0.248428	0	0.096449	0.987299	0.383546	0.721635	0.126633	0.126633	0.527863	0.520113	0.430113
JrWRKY50	0.169708	1.83456	0	0	3.69391	1.81066	0.854656	0	0.530284	3.46128	0.524378	3.35325	8.66367	8.66367	4.63817	1.68212	1.59212
JrWRKY51	0.169708	1.83456	0	0	3.69391	1.81066	0.854656	0	0.530284	3.46128	0.524378	3.35325	8.66367	8.66367	4.63817	1.68212	1.59212
JrWRKY52	0.169708	1.83456	0	0	3.69391	1.81066	0.854656	0	0.530284	3.46128	0.524378	3.35325	8.66367	8.66367	4.63817	1.68212	1.59212
JrWRKY53	18.0769	7.01726	0.306682	50.6448	20.6954	11.7197	69.4391	62.6301	13.9918	36.1835	34.9796	6.67713	10.5235	10.5235	11.275	5.99366	5.90366
JrWRKY54	2.88577	0.377168	0	1.74435	1.54052	0.497404	10.7011	0.770353	0.256877	10.737	0.339851	2.04589	4.48958	4.48958	2.26197	2.18594	2.09594
JrWRKY55	4.76983	8.12425	5.25472	6.52055	12.7431	12.1205	7.42408	6.18896	11.5893	6.7186	11.2404	10.2577	14.1745	14.1745	16.1976	12.6705	12.5805
JrWRKY56	13.9263	18.1381	4.78965	7.36091	13.4631	12.7745	8.58485	17.2097	11.9443	20.14	16.3773	17.7398	23.6625	23.6625	23.1622	23.765	23.675
JrWRKY57	6.46347	0.218105	0	0	0	0	0.823867	0.335416	0	7.50825	0.119431	0.0449059	0.0395028	0.0395028	0	0	0
JrWRKY58	20.1387	2.45626	0	6.69686	18.4526	7.44548	40.6073	1.42355	9.78294	63.2214	7.87431	4.38152	35.8684	35.8684	17.9528	5.45518	5.36518
JrWRKY59	2.82525	0.450209	0	0	0	0.141014	0	0	0	8.19207	0	0	0.790292	0.790292	0	0.613861	0.523861
JrWRKY60	0.9957	0.283346	0	0	0	0	0	0	0	0.564404	0	0.0965028	0	0	0	0.346453	0.256453
JrWRKY61	13.9263	18.1381	4.78965	7.36091	13.4631	12.7745	8.58485	17.2097	11.9443	20.14	16.3773	17.7398	23.6625	23.6625	23.1622	23.765	23.675
JrWRKY62	13.9263	18.1381	4.78965	7.36091	13.4631	12.7745	8.58485	17.2097	11.9443	20.14	16.3773	17.7398	23.6625	23.6625	23.1622	23.765	23.675
JrWRKY63	7.55074	6.13833	2.18174	5.13337	8.2929	5.9091	8.17388	4.98343	5.14253	14.6931	2.13299	5.07098	10.1034	10.1034	9.37339	4.95176	4.86176
JrWRKY64	0.0838693	0.240393	0.156508	0.148756	0	0	0	0.0671194	0	1.10615	0	0	0.0870112	0.0870112	0.0302729	0.0884574	0.0015426
JrWRKY65	27.2556	0.28422	0	1.30471	0.178069	0.518729	15.2459	11.0547	0.371184	1.38947	1.49988	0.847529	0.740949	0.740949	0	2.8307	2.7407
JrWRKY66	27.2556	0.28422	0	1.30471	0.178069	0.518729	15.2459	11.0547	0.371184	1.38947	1.49988	0.847529	0.740949	0.740949	0	2.8307	2.7407
JrWRKY67	27.2556	0.28422	0	1.30471	0.178069	0.518729	15.2459	11.0547	0.371184	1.38947	1.49988	0.847529	0.740949	0.740949	0	2.8307	2.7407
JrWRKY68	4.05631	0.715953	0	25.3384	14.4514	8.04564	12.8751	17.1602	7.27968	16.7517	0.772055	8.86098	2.549	2.549	1.59378	13.7424	13.6524
JrWRKY69	11.2622	2.66285	0	0.507508	0	0	0	0.382255	0	4.04499	0.389662	1.76162	0.256608	0.256608	1.95626	3.21215	3.12215
JrWRKY70	11.2622	2.66285	0	0.507508	0	0	0	0.382255	0	4.04499	0.389662	1.76162	0.256608	0.256608	1.95626	3.21215	3.12215
JrWRKY71	30.5111	6.51117	0.0440252	0.526874	0.106002	0.0279279	0.109223	0.53769	0	5.10091	3.7666	0.29157	0.76953	0.76953	0.0765056	0.707235	0.617235
JrWRKY72	14.1913	4.61242	9.32735	16.7133	18.0133	9.2538	19.834	7.83979	11.2483	11.582	11.0304	5.81255	6.69972	6.69972	7.52728	11.2086	11.1186
JrWRKY73	18.3523	11.7855	0	36.371	35.273	13.2072	90.7689	22.6727	12.8198	3.86743	1.54923	2.33137	2.35408	2.35408	1.84965	4.82028	4.73028
JrWRKY74	18.3523	11.7855	0	36.371	35.273	13.2072	90.7689	22.6727	12.8198	3.86743	1.54923	2.33137	2.35408	2.35408	1.84965	4.82028	4.73028
JrWRKY75	10.3993	2.61869	0	4.2521	1.5721	1.03906	8.32624	3.66516	1.53122	5.98756	46.349	2.17933	2.17546	2.17546	1.99653	2.57888	2.48888
JrWRKY76	13.5547	0.590052	0	45.4416	23.5788	18.5182	70.8589	18.047	8.72079	18.0494	0.13451	4.55199	5.73863	5.73863	3.55973	2.12582	2.03582
JrWRKY77	13.5547	0.590052	0	45.4416	23.5788	18.5182	70.8589	18.047	8.72079	18.0494	0.13451	4.55199	5.73863	5.73863	3.55973	2.12582	2.03582
JrWRKY78	10.9729	0	0	1.81879	0.362931	0.562949	6.27779	0	0.384357	0.83576	0.506569	0.66691	1.00439	1.00439	0.407379	0.513006	0.423006
JrWRKY79	13.5226	0	0	1.56648	0	0.0815736	0.3255	0	0.0842081	3.8048	0	0.125717	0.331074	0.331074	0.0766941	0.113095	0.023095
JrWRKY80	1.82196	0.778677	0.277136	0.581497	0.393443	0.524334	1.30582	2.4455	0.357356	9.65822	0.705912	0.531028	0.933205	0.933205	1.35196	0.396922	0.306922
JrWRKY81	3.98152	0.312979	0	0	0	0	0	0	0	3.05048	1.23341	0.309826	0	0	0.18754	0	0
JrWRKY82	92.8811	10.9055	1.16229	26.4486	25.7788	17.4606	65.9128	30.8442	9.06043	34.8589	42.1124	13.2854	23.5077	23.5077	13.3377	18.1725	18.0825
JrWRKY83	40.8987	1.47262	0.78437	9.65505	10.2736	2.9042	38.4231	0.506711	2.15094	75.9174	8.25328	1.88148	14.2982	14.2982	8.27531	2.27926	2.18926
JrWRKY84	0.821153	0.0780907	0	0	0	0	0	0	0	1.94736	0	0.319927	0.0702938	0.0702938	0.342218	0.0716915	0.0183085
JrWRKY85	3.12421	0	0	0	0.0334475	0	0.0917901	0	0	4.96128	0.0699352	0.683725	1.98904	1.98904	1.22305	0.517452	0.427452
JrWRKY86	2.68149	0.591745	0	0.338339	0	0	0.494343	0.573383	0	8.66785	0	0.293604	0.256608	0.256608	1.06705	1.87375	1.78375
JrWRKY87	0.774849	0	0	0	0	0	1.48842	0.425799	0.0607447	1.31968	0	0	0.158658	0.158658	0	0	0
JrWRKY88	4.98222	3.27812	0.305049	5.65317	4.13772	3.73813	5.21755	10.8242	2.70516	4.1228	1.60192	1.20467	1.90733	1.90733	2.53648	2.1542	2.0642
JrWRKY89	1.29972	0	0	0.170593	0	0	0.070727	0	0	6.17206	0	0	0.0711756	0.0711756	0	0.0722903	0.0177097
JrWRKY90	0.129751	0.0740811	0.238528	0	0	0	0	0	0	1.03492	0	0.3796	0.734042	0.734042	0.185655	0.340145	0.250145
JrWRKY91	0.864416	0.18543	0	0.0380743	0.28238	0.506209	0	0.0429524	0.299877	5.80439	2.53125	0.253836	1.00434	1.00434	0.698696	0.624882	0.534882
JrWRKY92	0	0.30886	0	0.184601	0.2972	1.60489	0.134368	0.208381	0.626185	3.97653	0	7.19471	1.0975	1.0975	0.66704	4.51348	4.42348
JrWRKY93	70.2161	19.7037	14.8081	51.9691	23.3381	17.827	157.413	67.4931	10.95	65.7645	89.8581	27.2105	55.0678	55.0678	35.4355	15.4656	15.3756
JrWRKY94	70.2161	19.7037	14.8081	51.9691	23.3381	17.827	157.413	67.4931	10.95	65.7645	89.8581	27.2105	55.0678	55.0678	35.4355	15.4656	15.3756
JrWRKY95	0	0.317569	0	0.721513	0	0	0.26369	0	0	0	0	0	0	0	0.190132	1.14758	1.05758
JrWRKY96	16.5553	10.6419	7.12897	16.3272	21.1443	17.2391	16.4907	5.77739	17.6959	17.7215	15.4457	13.0613	12.2596	12.2596	11.7214	16.7601	16.6701
JrWRKY97	16.5553	10.6419	7.12897	16.3272	21.1443	17.2391	16.4907	5.77739	17.6959	17.7215	15.4457	13.0613	12.2596	12.2596	11.7214	16.7601	16.6701
JrWRKY98	16.5553	10.6419	7.12897	16.3272	21.1443	17.2391	16.4907	5.77739	17.6959	17.7215	15.4457	13.0613	12.2596	12.2596	11.7214	16.7601	16.6701
JrWRKY99	1.89381	0.432639	0	2.12478	3.14695	1.22338	14.5306	0.0998824	3.78742	35.4792	0.491364	1.70011	3.89849	3.89849	2.71162	0.927144	0.837144
JrWRKY100	10.9044	0.319515	0.0495797	2.51586	0.956183	0.660035	4.55398	2.93353	0.540224	5.0693	2.56113	0.469754	0.206605	0.206605	0.086262	1.21791	1.12791
JrWRKY101	0.774849	0	0	0	0	0	1.48842	0.425799	0.0607447	1.31968	0	0	0.158658	0.158658	0	0	0
JrWRKY102	2.68149	0.591745	0	0.338339	0	0	0.494343	0.573383	0	8.66785	0	0.293604	0.256608	0.256608	1.06705	1.87375	1.78375
JrWRKY103	4.26432	0	0	0	0	0	0	0	0	1.01816	0.487262	1.04697	1.24311	1.24311	0.929034	0.749129	0.659129
