# Supplementary material for: Genome-Wide Identification and Transcriptional Expression Profiles of Transcription Factor WRKY in Common Walnut (Juglans regia L.)
Source: Genes (Basel). 2021 Sep 19;12(9):1444. doi: 10.3390/genes12091444 (PMC8466090; doi:10.3390/genes12091444)
Supplement: Supplementary file 1 [file genes-12-01444-s001.zip › TableS10.xlsx]

## Sheet: Sheet1
TableS10. The WRKY genes expression level in AR and AS fruits.
Geneid	AS-0-1	AS-0-2	AS-24-1	AS-24-2	AS-48-1	AS-48-2	AS-72-1	AS-72-2	AS-120-1	AS-120-2	AR-0-1	AR-0-2	AR-24-1	AR-24-2	AR-48-1	AR-48-2	AR-72-1	AR-72-2	AR-1-120	AR-120-2
JrWRKY1	7.30138	9.51635	4.37345	2.64644	6.10432	4.80823	4.78949	4.81272	4.11342	4.10413	8.93371	11.5572	3.10238	3.7855	5.11921	3.41289	4.98218	3.95632	4.82015	2.88459
JrWRKY2	7.30138	9.51635	4.37345	2.64644	6.10432	4.80823	4.78949	4.81272	4.11342	4.10413	8.93371	11.5572	3.10238	3.7855	5.11921	3.41289	4.98218	3.95632	4.82015	2.88459
JrWRKY3	1.65131	3.06376	3.0473	0.557744	8.95198	3.9956	1.73969	1.76475	1.51213	5.73952	4.66549	5.32552	3.80685	7.42769	8.32796	6.63415	5.33334	1.39047	6.86298	4.09838
JrWRKY4	0.344958	1.53752	2.92361	7.3357	20.1459	23.0024	51.6356	47.6541	15.4612	2.06897	0.176905	0.145571	2.60254	8.18509	28.8137	14.8339	54.9853	51.1394	16.3336	2.40551
JrWRKY5	0.320884	0.571662	0.190156	0.125529	0.555415	0.296824	0.0659434	0.13349	0.164187	0.161716	0.0934373	0.0731263	0.122205	0.230078	0.0496099	0.122375	0	0	0.8272	0.0403332
JrWRKY6	0.448454	0.381337	0.226562	0.219486	0.254846	0.213257	0.112652	0.102687	0.109694	0.182991	0.221535	0.219989	0.23246	0.363421	0.127353	0.184171	0.123714	0.0779451	0.315448	0.167068
JrWRKY7	0.448454	0.381337	0.226562	0.219486	0.254846	0.213257	0.112652	0.102687	0.109694	0.182991	0.221535	0.219989	0.23246	0.363421	0.127353	0.184171	0.123714	0.0779451	0.315448	0.167068
JrWRKY8	3.37234	3.46503	2.6344	2.20643	8.66756	3.59891	8.72014	5.21128	1.55945	1.23128	2.63556	3.11726	2.88306	2.90524	4.12966	3.04196	7.3881	4.92821	2.23172	0.388239
JrWRKY9	2.0078	2.6795	2.3016	2.61492	4.85322	3.61463	4.44237	4.62925	3.49028	2.22578	1.59349	2.11255	1.93031	2.12023	2.81313	3.05651	3.01615	2.14663	2.78634	0.918611
JrWRKY10	20.7506	35.0478	33.8351	40.9716	58.2119	55.985	60.5989	54.9582	51.0927	30.8381	23.9948	30.0105	33.1329	39.1395	67.423	56.4689	60.0433	65.3657	64.2312	16.4514
JrWRKY11	0.533063	0.416543	0.658829	1.07861	3.09772	2.17131	3.98943	2.73307	0.421334	0.937882	0.703693	0.921904	1.03717	1.65532	1.49205	1.55816	2.45629	2.30398	0.595211	0.325764
JrWRKY12	6.71072	10.7749	8.15054	15.3542	53.2351	32.9668	126.165	28.7934	18.3484	82	31.5307	32.8534	18.4127	27.3146	24.156	30.0091	70.4744	26.2258	21.2569	56.8999
JrWRKY13	29.8091	17.9856	21.7908	33.8219	61.7684	52.0282	67.8673	37.9901	21.1826	33.5006	29.6764	38.2068	29.3655	38.5885	35.4546	36.5771	45.6225	30.7398	12.4344	14.8412
JrWRKY14	29.8091	17.9856	21.7908	33.8219	61.7684	52.0282	67.8673	37.9901	21.1826	33.5006	29.6764	38.2068	29.3655	38.5885	35.4546	36.5771	45.6225	30.7398	12.4344	14.8412
JrWRKY15	0.769353	1.01289	0.714058	0.421409	0.943042	0.658895	0.451723	0.419683	0.342576	0.674979	0.825428	0.901133	0.785812	0.810688	0.522958	0.601332	0.461757	0.435184	0.619396	0.469504
JrWRKY16	0.769353	1.01289	0.714058	0.421409	0.943042	0.658895	0.451723	0.419683	0.342576	0.674979	0.825428	0.901133	0.785812	0.810688	0.522958	0.601332	0.461757	0.435184	0.619396	0.469504
JrWRKY17	1.65153	2.44456	0.819594	0.569261	1.40262	1.16168	1.00946	0.806176	0.462543	0.770109	1.84713	2.11367	0.793085	0.962339	0.803748	0.8212	0.860398	0.756919	0.697486	0.705774
JrWRKY18	20.387	29.5611	33.7462	29.1924	75.5656	52.4728	71.2161	51.1416	31.1582	40.3648	30.2971	38.1846	26.7691	38.3215	58.0215	48.814	79.2609	64.9965	57.4733	31.2714
JrWRKY19	12.5654	16.951	13.0923	13.127	38.1156	20.859	46.431	30.1701	11.1121	15.7346	15.0294	18.9245	14.1955	16.5934	24.7316	15.691	37.8065	31.6792	13.9281	8.06254
JrWRKY20	12.5654	16.951	13.0923	13.127	38.1156	20.859	46.431	30.1701	11.1121	15.7346	15.0294	18.9245	14.1955	16.5934	24.7316	15.691	37.8065	31.6792	13.9281	8.06254
JrWRKY21	9.90901	9.00184	3.39246	4.25773	19.5496	13.8316	16.4417	8.36425	2.43439	1.76685	3.86702	5.93394	4.42342	4.71602	5.52853	6.62692	9.16743	5.10448	2.59002	0.549613
JrWRKY22	0.456957	0.572632	0.266726	0.283757	0.363049	0.506954	0.674218	0.917609	0.469677	0.311159	0.205884	0.192641	0.132772	0.283621	0.251331	0.181254	0.478828	0.706155	0.349163	0.12492
JrWRKY23	10.3351	11.9643	10.5513	9.42612	11.2065	11.8397	12.6175	10.206	6.04862	9.17164	9.85524	11.6804	8.51002	8.74284	11.5896	9.97813	11.403	8.13144	5.63037	5.23484
JrWRKY24	0.0116802	0	0.0857108	0.0316267	0.332447	0.24353	0.0482243	0.0109703	0.0409376	0.097351	0.215979	0.209361	0.0739987	0.473047	0.219911	0.358567	0.043196	0.127062	0.502909	0.0782987
JrWRKY25	0.691092	0.73429	1.7845	3.20881	9.91146	5.20289	26.4603	8.66962	1.4274	6.42204	1.30494	0.935269	3.59375	7.3485	4.8839	5.94088	16.6783	6.48146	4.95097	4.45974
JrWRKY26	1.29885	3.46339	1.34309	1.20629	3.38716	1.8336	3.13412	2.08866	0.266849	1.24269	3.13975	3.1123	1.88076	2.41435	3.3535	1.86986	6.42718	3.42883	2.65258	1.17727
JrWRKY27	0.380607	0.814347	1.31292	1.95608	5.50173	1.80335	11.45	8.08732	1.64823	2.97804	3.7176	5.89462	3.8318	2.89247	6.13709	2.85094	15.6145	7.74452	7.40519	1.98652
JrWRKY28	0.380607	0.814347	1.31292	1.95608	5.50173	1.80335	11.45	8.08732	1.64823	2.97804	3.7176	5.89462	3.8318	2.89247	6.13709	2.85094	15.6145	7.74452	7.40519	1.98652
JrWRKY29	2.30469	2.75253	2.83163	6.53961	13.0589	6.95883	23.8938	8.0958	3.73064	14.8857	6.29	5.81676	11.8968	15.7517	8.25427	11.8313	24.9181	6.52274	9.22221	16.9326
JrWRKY30	0.0185774	0	0.017846	0.011192	0.466398	0.104518	0.255739	0.0289367	0.0218337	0.0404379	0.0779616	0.0350592	0.110583	0.2108	0.0996084	0.178843	0.142009	0.0887761	0.619992	0.0384927
JrWRKY31	3.58027	2.67105	2.71333	3.0399	3.06403	3.95153	2.09232	1.61125	1.94723	2.59761	3.40614	3.91585	4.08997	3.53893	3.57717	3.62084	2.98649	1.88816	3.39738	1.80896
JrWRKY32	3.58027	2.67105	2.71333	3.0399	3.06403	3.95153	2.09232	1.61125	1.94723	2.59761	3.40614	3.91585	4.08997	3.53893	3.57717	3.62084	2.98649	1.88816	3.39738	1.80896
JrWRKY33	10.8009	7.29234	6.64503	9.25222	17.5783	13.2166	16.6922	8.22604	1.71128	1.99953	11.7265	13.8334	12.6799	9.90355	7.07642	11.2848	9.37157	5.23984	1.22898	0.399921
JrWRKY34	2.52417	1.58613	2.44877	4.2318	8.28287	6.71872	13.9984	9.1491	0.578032	0.262566	3.01162	3.4951	3.04232	2.79317	4.69599	3.02259	10.4681	10.4194	0.52779	0.130259
JrWRKY35	0	0	0	0.0127463	0.905498	0.724392	0.0152956	0.0235565	0	0	0.710773	0.525216	0.609221	1.20183	0.475652	0.121374	0	0	0.568742	0
JrWRKY36	0	0	0	0.0127463	0.905498	0.724392	0.0152956	0.0235565	0	0	0.710773	0.525216	0.609221	1.20183	0.475652	0.121374	0	0	0.568742	0
JrWRKY37	9.38685	12.3561	7.17679	7.11821	22.4143	15.6584	23.5849	17.8075	8.68136	11.9099	7.49312	9.66276	8.0525	10.6309	16.3169	12.2261	25.2511	19.4904	14.4951	8.02021
JrWRKY38	3.73645	8.14438	5.15338	2.75003	4.44632	5.51598	15.9222	4.96676	1.74235	7.55921	5.76722	4.66084	7.29929	14.5696	13.2944	10.1885	19.3712	13.8666	4.33115	5.48592
JrWRKY39	3.73645	8.14438	5.15338	2.75003	4.44632	5.51598	15.9222	4.96676	1.74235	7.55921	5.76722	4.66084	7.29929	14.5696	13.2944	10.1885	19.3712	13.8666	4.33115	5.48592
JrWRKY40	4.04346	4.10454	1.74975	2.18266	5.75455	4.92876	8.51688	3.99502	1.53575	2.79927	3.09873	3.53121	2.0821	2.94536	2.58561	2.55195	4.85336	2.82545	1.36989	0.881383
JrWRKY41	0.0592284	0.0467676	0.0962338	0.0422646	0.219627	0.128111	0	0.0101693	0	0	0.0327109	0.0141029	0.0107295	0.0975259	0.0698216	0.0254653	0	0	0.43553	0
JrWRKY42	4.66768	4.56685	8.20342	18.8908	46.3687	27.6131	68.3859	19.5698	4.26022	36.2943	24.5925	27.1884	26.743	33.8793	24.5599	29.3034	68.2797	25.4392	22.1898	48.3966
JrWRKY43	19.924	28.1196	8.80423	10.1209	20.4901	16.4278	31.0832	18.9545	7.84261	10.8344	23.3938	26.0496	12.239	11.4222	13.0606	11.3354	25.3116	16.0108	9.45036	8.50753
JrWRKY44	0.256817	0.410434	1.25349	0.764875	3.01733	1.52321	3.36114	1.30367	0.506389	2.75321	0.688947	0.79149	1.57923	2.86442	1.25363	1.03769	2.59418	0.969346	1.58667	1.69112
JrWRKY45	70.4058	128.386	36.5862	55.3149	103.132	108.574	115.608	73.8575	69.4849	90.9084	80.6995	88.174	38.7413	53.972	80.8139	78.7098	90.126	79.7292	86.2444	49.2774
JrWRKY46	0.0559823	0.0761207	0	0.0850677	0.385927	0.181235	1.24252	0.562033	0.00763184	0.155212	0.180884	0.141627	0.0303036	0.102022	0.133217	0.248396	0.637899	0.358156	0.0975806	0.227959
JrWRKY47	0.101422	0.609311	0.288908	0.900376	3.27709	2.92212	7.3051	3.60122	0.124249	0.637753	0.915924	1.27727	0.596997	0.773801	2.6431	1.75119	7.54413	4.82391	0.750786	0.553887
JrWRKY48	0.101422	0.609311	0.288908	0.900376	3.27709	2.92212	7.3051	3.60122	0.124249	0.637753	0.915924	1.27727	0.596997	0.773801	2.6431	1.75119	7.54413	4.82391	0.750786	0.553887
JrWRKY49	0.164615	0.500842	0.0441753	0.0826035	0.606169	0.264106	1.94768	2.2376	0.0399667	0.49737	0.1853	0.411109	0.18051	0.215545	0.304879	0.262275	3.03376	0.81505	0.576525	0.0536206
JrWRKY50	0.180575	0.771206	0.288198	0.324568	1.44831	0.912011	3.62487	3.18102	0.183472	0.8285	1.07409	0.709682	0.633227	0.821097	1.07232	0.901762	2.62929	1.45093	0.521584	0.284951
JrWRKY51	0.180575	0.771206	0.288198	0.324568	1.44831	0.912011	3.62487	3.18102	0.183472	0.8285	1.07409	0.709682	0.633227	0.821097	1.07232	0.901762	2.62929	1.45093	0.521584	0.284951
JrWRKY52	0.180575	0.771206	0.288198	0.324568	1.44831	0.912011	3.62487	3.18102	0.183472	0.8285	1.07409	0.709682	0.633227	0.821097	1.07232	0.901762	2.62929	1.45093	0.521584	0.284951
JrWRKY53	22.6865	23.629	7.29303	6.18045	17.3853	18.1264	10.058	6.95586	6.26526	8.73898	18.5834	23.7684	7.83547	9.70687	8.79231	10.0071	10.6976	7.98611	8.48282	9.72121
JrWRKY54	4.86966	3.19179	4.19528	2.78603	6.54201	5.84963	1.3602	1.15413	2.06868	5.42865	3.65583	5.49382	8.42913	10.9503	7.03777	7.96103	1.85856	1.24846	6.65903	4.81033
JrWRKY55	0.769353	1.01289	0.714058	0.421409	0.943042	0.658895	0.451723	0.419683	0.342576	0.674979	0.825428	0.901133	0.785812	0.810688	0.522958	0.601332	0.461757	0.435184	0.619396	0.469504
JrWRKY56	1.65153	2.44456	0.819594	0.569261	1.40262	1.16168	1.00946	0.806176	0.462543	0.770109	1.84713	2.11367	0.793085	0.962339	0.803748	0.8212	0.860398	0.756919	0.697486	0.705774
JrWRKY57	0.533063	0.416543	0.658829	1.07861	3.09772	2.17131	3.98943	2.73307	0.421334	0.937882	0.703693	0.921904	1.03717	1.65532	1.49205	1.55816	2.45629	2.30398	0.595211	0.325764
JrWRKY58	12.1442	17.2303	6.96218	14.2591	47.8782	36.1534	110.296	29.9568	11.6514	49.1762	32.224	28.9948	22.9254	39.2561	21.3389	34.1594	58.1595	21.8654	18.4518	39.2198
JrWRKY59	0.0610248	0.0322492	0.164901	0.0440556	0.347236	0.0773224	0	0.0315355	0.0329745	0.0224696	0.0344707	0.118227	0.0925485	0.239386	0.0900635	0.135832	0.0300043	0.0416799	0.321647	0.0106995
JrWRKY60	0.508391	0.371582	1.1433	1.02707	1.81361	1.48016	2.80604	1.106	0.250942	1.40949	0.484019	0.693702	1.42929	3.96042	1.39378	2.34327	1.73238	0.889721	0.557521	0.481101
JrWRKY61	1.65153	2.44456	0.819594	0.569261	1.40262	1.16168	1.00946	0.806176	0.462543	0.770109	1.84713	2.11367	0.793085	0.962339	0.803748	0.8212	0.860398	0.756919	0.697486	0.705774
JrWRKY62	1.65153	2.44456	0.819594	0.569261	1.40262	1.16168	1.00946	0.806176	0.462543	0.770109	1.84713	2.11367	0.793085	0.962339	0.803748	0.8212	0.860398	0.756919	0.697486	0.705774
JrWRKY63	0.99166	1.0273	1.00355	0.792034	1.35784	1.01464	1.54694	0.952029	0.518188	1.07033	0.981313	1.01772	1.37656	1.4032	1.1164	0.875987	1.12287	0.765906	0.862615	0.8016
JrWRKY64	0.0295902	0.115312	0.0686541	0.0318149	0.361644	0.169867	0.114098	0.093047	0.00585155	0.0064285	0.0761945	0.0603885	0.073531	0.142929	0.175903	0.0503412	0.0995432	0.10097	0.370371	0.0413849
JrWRKY65	45.1541	79.6726	127.563	117.491	171.02	238.406	196.634	212.448	242.481	187.419	31.7874	39.4774	66.2904	77.1283	230.515	201.895	211.774	227.773	227.488	91.196
JrWRKY66	45.1541	79.6726	127.563	117.491	171.02	238.406	196.634	212.448	242.481	187.419	31.7874	39.4774	66.2904	77.1283	230.515	201.895	211.774	227.773	227.488	91.196
JrWRKY67	45.1541	79.6726	127.563	117.491	171.02	238.406	196.634	212.448	242.481	187.419	31.7874	39.4774	66.2904	77.1283	230.515	201.895	211.774	227.773	227.488	91.196
JrWRKY68	1.46511	2.47319	0.477213	0.444661	0.666937	0.588514	0.29158	0.377895	0.557861	0.682926	0.356536	0.411281	0.372716	0.473241	0.150771	0.38637	0.0752131	0.336024	1.25913	0.470126
JrWRKY69	1.92856	6.48988	3.02024	3.9221	12.1037	4.61638	26.397	15.7145	2.99968	11.8075	1.43175	1.70208	1.59764	2.97972	13.5424	4.66613	34.4605	16.5292	11.4105	5.89188
JrWRKY70	1.92856	6.48988	3.02024	3.9221	12.1037	4.61638	26.397	15.7145	2.99968	11.8075	1.43175	1.70208	1.59764	2.97972	13.5424	4.66613	34.4605	16.5292	11.4105	5.89188
JrWRKY71	0.442728	0.39904	0.776526	0.605963	3.21204	2.00085	3.77988	1.32438	0.335878	0.281392	0.343316	0.33918	2.0288	1.51628	2.00773	2.4725	3.35523	2.56502	0.699727	0.168776
JrWRKY72	2.14514	2.03871	2.80387	2.38162	2.41951	2.67392	2.42753	2.18797	2.47346	3.26503	1.64341	2.14313	3.64283	3.47487	3.25347	3.40681	2.95296	2.28074	4.15187	2.56745
JrWRKY73	0.0934373	0.0731263	0.122205	0.230078	0.0496099	0.122375	0	0	0.8272	0.0403332	70.4058	128.386	36.5862	55.3149	103.132	108.574	115.608	73.8575	69.4849	90.9084
JrWRKY74	0.221535	0.219989	0.23246	0.363421	0.127353	0.184171	0.123714	0.0779451	0.315448	0.167068	36.6524	34.5898	54.7405	53.1519	107.076	102.903	36.5148	37.7264	60.5194	100.584
JrWRKY75	12.1355	10.0912	2.52508	4.22001	3.71233	4.07341	2.78485	2.60357	1.19601	2.09089	4.14753	5.5606	5.35012	3.36418	1.59515	2.86239	2.76655	2.0978	0.652865	0.804777
JrWRKY76	5.12643	8.4049	8.07897	3.549	6.208	4.6369	5.44278	4.11701	3.14275	8.16301	8.5222	9.07471	6.96329	7.66955	5.23149	4.019	5.15761	3.5361	4.49197	6.36484
JrWRKY77	5.12643	8.4049	8.07897	3.549	6.208	4.6369	5.44278	4.11701	3.14275	8.16301	8.5222	9.07471	6.96329	7.66955	5.23149	4.019	5.15761	3.5361	4.49197	6.36484
JrWRKY78	25.173	14.2759	4.1207	5.17161	7.45678	6.559	15.1732	14.7281	3.35276	7.31247	9.62256	14.7665	6.97852	6.88948	7.32977	5.42917	12.462	7.0821	4.27817	3.9614
JrWRKY79	0.91998	1.90072	1.64634	1.294	1.18674	1.00975	6.10846	2.8965	0.922003	4.29755	2.01446	1.24801	1.91756	4.27326	2.31781	1.31955	7.50125	2.98132	0.800749	1.06663
JrWRKY80	2.89064	2.33287	1.40011	2.63676	4.61	4.49164	3.16027	2.8216	1.71305	1.46828	2.25062	3.5686	3.6983	2.95972	1.37819	2.29152	1.85022	1.37125	2.02016	0.591494
JrWRKY81	0	0.246142	0.556394	0.569523	4.53755	1.12185	0	0	0	0	0.34177	0.428257	1.06729	1.36211	0.218147	0.592147	0	0	1.37738	0
JrWRKY82	23.313	29.7487	17.7525	17.4398	38.9427	28.8601	40.2964	31.0086	20.9948	25.1634	31.3262	40.1711	18.1751	18.956	19.6456	17.1454	29.8895	19.6541	24.9394	15.8914
JrWRKY83	0.0359521	0.0122844	0.0813085	0.0516796	0.158416	0.256116	0.032155	0.0710971	0.0505392	0.117552	69.4552	72.3472	168.686	176.384	146.627	162.929	138.608	238.735	250.586	240.946
JrWRKY84	0.171605	0.394384	0.151655	0.104571	1.2108	0.978884	3.02177	0.922941	0.093882	0.461994	0.850346	0.888971	0.381146	1.05022	1.0409	1.11866	2.20785	1.44965	0.392959	0.877106
JrWRKY85	0.0111182	0.0151403	0.176049	0.124914	0.818523	0.444816	0.379935	0.295182	0.0249212	0.00685132	0.0554993	0.0880858	0.198449	0.327344	0.28066	0.245661	0.272041	0.325293	0.560975	0
JrWRKY86	18.0544	25.7542	25.0119	48.1391	104.295	90.7022	134.855	153.564	53.5485	18.1568	23.4231	27.8715	38.0861	30.8754	99.3623	69.0695	147.515	177.757	49.5293	8.56921
JrWRKY87	0.0359521	0.0122844	0.0813085	0.0516796	0.158416	0.256116	0.032155	0.0710971	0.0505392	0.117552	0.192623	0.184167	0.159143	0.379347	0.119029	0.0891548	0.0654902	0	0.147675	0.0834577
JrWRKY88	1.76132	2.19654	1.52039	0.970394	1.6712	1.42536	0.795404	0.767855	0.685094	1.37071	1.80481	2.2995	1.77821	1.56565	1.89606	1.3674	1.31493	0.884539	1.46884	1.61078
JrWRKY89	0.0105492	0.0431691	0.021514	0.0459573	0.400808	0.120278	0.151693	0.141229	0.0195734	0.0715997	0.0546677	0.0575001	0.104924	0.208153	0.148587	0.104567	0.145596	0.091226	0.261228	0.00969344
JrWRKY90	0.082547	0.128855	0.0848191	0.188993	2.70034	1.3551	8.13197	4.76637	0.141067	0.415916	0.294534	0.374408	0.329705	0.441192	2.80767	2.00425	8.35066	5.69923	0.507518	0.437088
JrWRKY91	0.199581	0.144194	0.163226	0.164705	1.09515	0.793923	0.458883	0.389833	0.135262	0.147857	0.336725	0.378148	0.283057	0.681716	0.375331	0.299052	0.258531	0.543907	0.932413	0.035079
JrWRKY92	0.1731	0.280784	0.0459517	0.0333773	0.339681	0.148155	0.0667139	0.00752775	0.0435715	0.0513634	0.111629	0.186652	0.0912637	0.150872	0.0440816	0.0716656	0	0	0.30069	0.0103294
JrWRKY93	22.0685	31.9178	23.3149	21.9236	60.4475	35.2872	59.3334	36.5272	28.1697	54.5246	31.4369	39.896	38.9392	39.8881	45.0622	35.9596	77.7927	46.2523	47.0282	38.6573
JrWRKY94	22.0685	31.9178	23.3149	21.9236	60.4475	35.2872	59.3334	36.5272	28.1697	54.5246	31.4369	39.896	38.9392	39.8881	45.0622	35.9596	77.7927	46.2523	47.0282	38.6573
JrWRKY95	0.048908	0.0622078	0	0.0700057	0.378488	0.48316	0.634812	0.463858	0.0915709	0.0414002	0	0.1094	0.106718	0.304956	0.356906	0.14498	0.758778	1.04552	0.736514	0.0595962
JrWRKY96	1.80816	1.79252	1.01784	0.837677	0.871883	0.982098	0.765245	0.620722	0.920468	1.20362	1.37675	1.45728	1.27086	1.07708	0.904585	0.817085	0.659207	0.594748	1.07212	0.680966
JrWRKY97	1.80816	1.79252	1.01784	0.837677	0.871883	0.982098	0.765245	0.620722	0.920468	1.20362	1.37675	1.45728	1.27086	1.07708	0.904585	0.817085	0.659207	0.594748	1.07212	0.680966
JrWRKY98	1.80816	1.79252	1.01784	0.837677	0.871883	0.982098	0.765245	0.620722	0.920468	1.20362	1.37675	1.45728	1.27086	1.07708	0.904585	0.817085	0.659207	0.594748	1.07212	0.680966
JrWRKY99	4.92522	6.61616	1.95224	4.75554	20.8171	11.0219	52.4665	15.5156	2.39369	13.7948	11.0035	8.33523	5.74811	8.31962	8.99315	14.4559	26.996	10.436	4.90162	11.3945
JrWRKY100	3.73149	5.51619	1.96883	1.46096	3.08293	2.73246	2.92782	2.36204	2.16577	2.19774	4.82154	5.84765	2.10525	3.01098	2.67985	2.02953	3.23296	2.75359	3.42749	1.77869
JrWRKY101	0.0359521	0.0122844	0.0813085	0.0516796	0.158416	0.256116	0.032155	0.0710971	0.0505392	0.117552	0.192623	0.184167	0.159143	0.379347	0.119029	0.0891548	0.0654902	0	0.147675	0.0834577
JrWRKY102	18.0544	25.7542	25.0119	48.1391	104.295	90.7022	134.855	153.564	53.5485	18.1568	23.4231	27.8715	38.0861	30.8754	99.3623	69.0695	147.515	177.757	49.5293	8.56921
JrWRKY103	0.0438283	0.0433071	0.0602226	0.0311641	0.427508	0.321505	0.325372	0.199974	0.0168864	0.0259657	0.0681717	0.109982	0.0790631	0.100577	0.257912	0.232971	0.414582	0.366424	0.355394	0.0178964
