# Supplementary material for: Genome-Wide Identification and Transcriptional Expression Profiles of Transcription Factor WRKY in Common Walnut (Juglans regia L.)
Source: Genes (Basel). 2021 Sep 19;12(9):1444. doi: 10.3390/genes12091444 (PMC8466090; doi:10.3390/genes12091444)
Supplement: Supplementary file 1 [file genes-12-01444-s001.zip › TableS11.xlsx]

## Sheet: Sheet1
Table S11. The qPCR data of three genes.
Gene id	AR leaf	AS leaf	AR fruit	AS fruit
JrWRKY83	3.36595	0.143591	4.28174	0.143591
JrWRKY73	4.25233	0.403043	3.43728	0.143591
JrWRKY74	2.071	0.183856	4.18386	0.143591
