# Supplementary material for: Genome-Wide Identification and Transcriptional Expression Profiles of Transcription Factor WRKY in Common Walnut (Juglans regia L.)
Source: Genes (Basel). 2021 Sep 19;12(9):1444. doi: 10.3390/genes12091444 (PMC8466090; doi:10.3390/genes12091444)
Supplement: Supplementary file 1 [file genes-12-01444-s001.zip › TableS12.xlsx]

## Sheet: Sheet1
TableS12. The predicted miRNA sequence target WRKY genes.
>Jre-miR156a
TGACAGAAGAGAGTGAGCAC
>Jre-miR156b
TTGACAGAAGATAGAGAGCAC
>Jre-miR156c
TTGACAGAAGATAGAGAGCAC
>Jre-miR156d
TTGACAGAAGATAGAGAGCAC
>Jre-miR156e
TTGACAGAAGATAGAGAGCAC
>Jre-miR156f
TTGACAGAAGACAGAGAGCAC
>Jre-miR156g
TTGACAGAAGAGAGAGAGCAC
>Jre-miR156h
TGACAGAAGAGAGTGAGCAC
>Jre-miR156i
TGACAGAAGAGAGTGAGCAC
>Jre-miR156j
TGACAGAAGAGAGTGAGCAC
>Jre-miR156k
TGACAGAAGAGAGTGAGCAC
>Jre-miR156l
TGACAGAAGAGAGTGAGCAC
>Jre-miR159a
TTTGGATTGAAGGGAGCTGTA
>Jre-miR159b
TTGGACTGAAGGGAGCTCCC
>Jre-miR159c
TTGGACTGAAGGGAGCTCCC
>Jre-miR159d
ATTGGACTGAAGGGAGCTCC
>Jre-miR159e
TTTGGATTGAAGGGAGCTCTA
>Jre-miR159f
CTTGGAGTGAAGGGAGCTCGA
>Jre-miR159g
TTGGACTGAAGGGAGCTCCC
>Jre-miR159h
TTGGACTGAAGGGAGCTCCC
>Jre-miR159i
TTGGACTGAAGGGAGCTCCC
>Jre-miR159j
TTGGACTGAAGGGAGCTCCC
>Jre-miR159k
TTTGGATTGAAGGGAGCTCTA
>Jre-miR160a
TGCCTGGCTCCCTGAATGCCA
>Jre-miR160b
TGCCTGGCTCCCTGAATGCCA
>Jre-miR160c
TGCCTGGCTCCCTGTATGCCA
>Jre-miR160d
TGCCTGGCTCCCTGTATGCCA
>Jre-miR160e
TGCCTGGCTCCCTGTATGCCA
>Jre-miR160f
TGCCTGGCTCCCTGTATGCCA
>Jre-miR162a
TCGATAAACCTCTGCATCCAG
>Jre-miR162b
TCGATAAACCTCTGCATCCAG
>Jre-miR164a
TGGAGAAGCAGGGCACGTGCA
>Jre-miR164b
TGGAGAAGCAGGGCACGTGCA
>Jre-miR164c
TGGAGAAGCAGGGCACGTGCA
>Jre-miR164d
TGGAGAAGCAGGGCACGTGCA
>Jre-miR164e
TGGAGAAGCAGGGCACGTGCA
>Jre-miR165a
TCGGACCAGGCTTCATTCCCC
>Jre-miR165b
TCGGACCAGGCTTCATTCCCC
>Jre-miR165c
TCGGACCAGGCTTCATTCCCC
>Jre-miR165d
TCGGACCAGGCTTCATTCCCC
>Jre-miR165e
TCGGACCAGGCTTCATTCCCC
>Jre-miR165f
TCGGACCAGGCTTCATTCCCC
>Jre-miR165g
TCGGACCAGGCTTCATTCCCC
>Jre-miR165h
TCGGACCAGGCTTCATTCCCC
>Jre-miR165i
TCGGACCAGGCTTCATTCCCC
>Jre-miR165j
TCGGACCAGGCTTCATTCCCC
>Jre-miR165k
TCGGACCAGGCTTCATTCCCC
>Jre-miR165l
TCGGACCAGGCTTCATTCCCC
>Jre-miR165m
TCGGACCAGGCTTCATTCCC
>Jre-miR166a
TTCAGGACCAGGCTTCATTCC
>Jre-miR167a
TGAAGCTGCCAGCATGATCT
>Jre-miR167b
TGAAGCTGCCAGCATGATCT
>Jre-miR167c
TGAAGCTGCCAGCATGATCT
>Jre-miR167d
TGAAGCTGCCAGCATGATCTTA
>Jre-miR167e
TGAAGCTGCCAGCATGATCT
>Jre-miR167f
TGAAGCTGCCAGCATGATCTTA
>Jre-miR167g
TGAAGCTGCCAGCATGATCTG
>Jre-miR167h
TGAAGCTGCCAGCATGATCTG
>Jre-miR168a
TCGCTTGGTGCAGGTCGGGAA
>Jre-miR169a
TAGCCAAGGATGACTTGCCT
>Jre-miR169b
TAGCCAAGGATGACTTGCCT
>Jre-miR169c
TAGCCAAGGATGACTTGCCT
>Jre-miR169d
TAGCCAAGGATGACTTGCCT
>Jre-miR169e
TAGCCAAGGATGACTTGCCT
>Jre-miR169f
TAGCCAAGGATGACTTGCCT
>Jre-miR169g
TAGCCAAGGATGACTTGCCT
>Jre-miR169h
AAGCCAAGGATGAATTGCCGG
>Jre-miR169i
CAGCCAAGGATGACTTGCCGG
>Jre-miR169j
CAGCCAAGGATGACTTGCCGG
>Jre-miR169k
CAGCCAAGGATGACTTGCCGG
>Jre-miR170a
TATTGGCCTGGTTCACTCAGA
>Jre-miR170b
TATTGGCCTGGTTCACTCAGA
>Jre-miR170c
TTGAGCCGCGCCAATATCACT
>Jre-miR170d
TTGAGCCGCGTCAATATCTCT
>Jre-miR170e
TTGAGCCGCGCCAATATCACT
>Jre-miR170f
TTGAGCCGCGTCAATATCTCC
>Jre-miR170g
TGATTGAGCCGTGCCAATATC
>Jre-miR170h
TGATTGAGCCGTGCCAATATC
>Jre-miR170i
TGATTGAGCCGTGCCAATATC
>Jre-miR170j
TGATTGAGCCGTGCCAATATC
>Jre-miR170k
TGATTGAGCCGTGCCAATATC
>Jre-miR170l
TGATTGAGCCGTGCCAATATC
>Jre-miR170m
TGATTGAGCCGTGCCAATATC
>Jre-miR170n
TGAGCCGAACCAATATCACTC
>Jre-miR170o
TGATTGAGCCATGCCAATATC
>Jre-miR171a
TTAGATGCCCATCAACGAAC
>Jre-miR172a
AGAATCTTGATGATGCTGCAT
>Jre-miR172b
GGAATCTTGATGATGCTGCAG
>Jre-miR172c
AGAATCTTGATGATGCTGCAT
>Jre-miR172d
AGAATCTTGATGATGCTGCAT
>Jre-miR172e
GGAATCTTGATGATGCTGCAG
>Jre-miR172f
AGAATCTTGATGATGCTGCAT
>Jre-miR2111a
TAATCTGCATCCTGAGGTTTA
>Jre-miR2111b
TAATCTGCATCCTGAGGTTTA
>Jre-miR390a
AAGCTCAGGAGGGATAGCGCC
>Jre-miR390b
AAGCTCAGGAGGGATAGCGCC
>Jre-miR390c
AAGCTCAGGAGGGATAGCACC
>Jre-miR393a
TCCAAAGGGATCGCATTGATC
>Jre-miR393b
TCCAAAGGGATCGCATTGATC
>Jre-miR393c
TCCAAAGGGATCGCATTGATCT
>Jre-miR394a
TTGGCATTCTGTCCACCTCC
>Jre-miR394b
TTGGCATTCTGTCCACCTCC
>Jre-miR394c
TTGGCATTCTGTCCACCTCC
>Jre-miR394d
TTGGCATTCTGTCCACCTCC
>Jre-miR395a
CTGAAGTGTTTGGGGGAACTC
>Jre-miR395b
CTGAAGTGTTTGGGGGAACTC
>Jre-miR395c
CTGAAGTGTTTGGGGGAACTC
>Jre-miR395d
CTGAAGTGTTTGGGGGAACTC
>Jre-miR395e
CTGAAGTGTTTGGGGGAACTC
>Jre-miR395f
CTGAAGTGTTTGGGGGAACTC
>Jre-miR395g
CTGAAGTGTTTGGGGGAACTC
>Jre-miR395h
CTGAAGTGTTTGGGGGAACTC
>Jre-miR395i
CTGAAGTGTTTGGGGGAACTC
>Jre-miR395j
CTGAAGTGTTTGGGGGAACTC
>Jre-miR396a
TCCCACAGCTTTCTTGAACTT
>Jre-miR396b
TTCCACAGCTTTCTTGAACTG
>Jre-miR396c
TTCCACAGCTTTCTTGAACTG
>Jre-miR396d
TTCCACAGCTTTCTTGAACTG
>Jre-miR396e
TTCCACAGCTTTCTTGAACTT
>Jre-miR396f
TTCCACAGCTTTCTTGAACTT
>Jre-miR397a
TCATTGAGTGCAGCGTTGATG
>Jre-miR398a
TGTGTTCTCAGGTCACCCCTT
>Jre-miR398b
TGTGTTCTCAGGTCACCCCTT
>Jre-miR398c
TGTGTTCTCAGGTCGCCCCTG
>Jre-miR398d
TGTGTTCTCAGGTCGCCCCTG
>Jre-miR398e
TGTGTTCTCAGGTCGCCCCTG
>Jre-miR398f
TATGTTCTCAGGTCGCCCCTG
>Jre-miR399a
TGCCAAAGGAGAATTGCCCTG
>Jre-miR399b
TGCCAAAGGAGAATTGCCCTG
>Jre-miR399c
CGCCAAAGGAGAGTTGCCCTT
>Jre-miR399d
CGCCAAAGGAGAGTTGCCCTT
>Jre-miR399e
TGCCAAAGGAGAGTTGCCCTG
>Jre-miR399f
TGCCAAAGGAGAGTTGCCCTG
>Jre-miR403a
TTAGATTCACGCACAAACTCG
>Jre-miR403b
TTAGATTCACGCACAAACTCG
>Jre-miR408a
ATGCACTGCCTCTTCCCTGGC
>Jre-miR472a
TCTTTCCTACTCCTCCCATTCC
>Jre-miR472b
TCTTTCCTAGTCCTCCCATTCC
>Jre-miR477a
TCCCTCAAAGGCTTCCAGCATT
>Jre-miR477b
TCCCTCAAAGGCTTCCAGCATT
>Jre-miR477c
TCCCTCAAAGGCTTCCAGCATT
>Jre-miR477d
TCCCTCAAAGGCTTCCAGCATT
>Jre-miR477e
CTCTCTCTCAAGGGCTTCTT
>Jre-miR482a
TTCCCAAAGCCGCCCATTCCAA
>Jre-miR482b
TTCCCAAAGCCGCCCATTCCGA
>Jre-miR482c
TTTCCTAGACCACCCATTCCAC
>Jre-miR482d
TTGCCAATTCCACCCATTCCAA
>Jre-miR530a
TGCATTTGCACCTGCACCTAT
>Jre-miR530b
TGCATTTGCACCTGCACCTCT
>Jre-miR530c
TGCATTTGCACCTGCACCTCT
>Jre-miR530d
TGCATTTGCACCTGCACCTCT
>Jre-miR5675a
AGCAATGGATTCTGAGGGAT
>Jre-miR7972a
TTGTCAGGGTTGTGATTCTCC
>Jre-miR8175a
TCTCCCCGGCAACGGCGCCA
>Jre-miRN745a
TTGGGTCGTTGCGATTACGGGT
>Jre-miRN745b
TTGGGTCGTTGCGATTACGGGT
>Jre-miRN745c
TTGGGTCGTTGCGATTACGGGT
>Jre-miRN5866
GCCGATTTATACGATTACATTT
>Jre-miRN5867
TAGAGATCCTCGTTTTACTTCT
>Jre-miRN5868
GTTCCTCTGAATACTTCACT
>Jre-miRN5869
GGGCGTCTCTTCCTTTGCAAG
>Jre-miRN5870
TTTCCCGAACCACCCATTCCGC
>Jre-miRN5871
ATATTCGGAAGGCTTTGGCATGGG
>Jre-miRN5872
TTTGCAAGACTGAACCGGAGGA
>Jre-miRN5873
CTTGTACCAACTGTCTCTGGCT
>Jre-miRN5874
GCTGGAACGTTTTGAGGGACC
>Jre-miRN5875
CATGTGCTCTTGCTCTCCAGC
>Jre-miRN5876
TGCTTACTCTCTATCTGTCACC
>Jre-miRN5877
GAAGGGAAAACTGAGGAGCT
>Jre-miRN5878
CCTTGATGTGAACCAAAGCCAA
>Jre-miRN5879
AAGTTCTGAATCTGAAAGCCT
>Jre-miRN5880
AACCGTGTTTCTCTGTATAAGG
>Jre-miRN5881
AAGTTCTGAATCTGAAAGCCT
>Jre-miRN5882
TACTTTCCTTCAACACTTCTCT
>Jre-miRN5883
CGGGGGACTGCTCGAGCTGC
>Jre-miRN5884
CTGAGCGGTTACCTGAGCACC
>Jre-miRN5885
CATGTGCCCGTCTTCACCATC
>Jre-miRN5886
GGGCAATTACACCTTGGGCAGT
>Jre-miRN5887
CGTCTGTATGATTTTTATGCCT
>Jre-miRN5888
TAGGTTGACGATGTAGGACGT
>Jre-miRN5889
CAATGGCACAGTGAAGAATAG
>Jre-miRN5890
TCTGAGGATGAATAGAAAATA
>Jre-miRN5891
TGGCTGCCATGCATCGTCTAGC
>Jre-miRN5892
CATGTGCTCTAGCTCTCCAGC
>Jre-miRN5893
ACTCTTCTCTCAAAGGCTTCT
>Jre-miRN5894
ATTGATTATAGAGAGGGCATC
>Jre-miRN5895
TTTTGTTGGAGAAGCAGGGGCC
>Jre-miRN5896
TTTTGTTGGAGAAGCAGGGGCC
>Jre-miRN5897
TTTTGTTGGAGAAGCAGGGGCC
>Jre-miRN5898
TTTTGTTGGAGAAGCAGGGGCC
>Jre-miRN5899
TTTGTGGGATGAGAAGACTTCT
>Jre-miRN5900
TGCCATCGTTCTGGGACAAGA
>Jre-miRN5901
TCCATCTCCCCTCGGCTGAAG
>Jre-miRN5902
CCAGTCCCGAACCCGTCGGCG
>Jre-miRN5903
CCAGTCCCGAACCCGTCGGCG
>Jre-miRN5904
TAATTTAATATCGTGTGGCCC
>Jre-miRN5905
CGAGGCCTTGGGGGAGAGTGC
>Jre-miRN5906
CGGTGTTATCCTTGGCTCACG
>Jre-miRN5907
TTCCCTTGACCACTTCATTGG
>Jre-miRN5908
TCTCATGATCTTTTAACTGGCG
>Jre-miRN5909
AATTATATAATCTGATCCCT
>Jre-miRN5910
GTATGTTGGGCTATAGTAGTC
>Jre-miRN5911
TACTTCCTGCGTACTTGGGCT
>Jre-miRN5912
CATCTCTCCTTGGCAGAAACC
