# Supplementary material for: Genome-Wide Identification and Transcriptional Expression Profiles of Transcription Factor WRKY in Common Walnut (Juglans regia L.)
Source: Genes (Basel). 2021 Sep 19;12(9):1444. doi: 10.3390/genes12091444 (PMC8466090; doi:10.3390/genes12091444)
Supplement: Supplementary file 1 [file genes-12-01444-s001.zip › TableS13.xlsx]

## Sheet: Sheet1
TableS13. The target WRKY genes sequence were targeted by miRNAs.
>Jr01_03140_p1
AGGGCTCTGCCGAAATCTCTTTTGCAACCATCAGGTCAGCGGTTGATTCCAGTGGACTAA
CATAGGTACTTCCTGTGTAATTGGCTGACGACACTTCCTGTTTATACTCTCCTCCGCTTG
CTTTTGTAAATTGAGATTCAGATTTGATCTCCCATGTGATTTTGTTAACACCTAAAATAG
GAGGTAACTTGAAGTAGTTACATATGGTTGTAGCTTTAAGTTCCTTGGCTGTTATTGGTC
TTGTTTAATTCTTCTCACAGGCAATTTGAGGTCCAAGCAAAGAACCATAGTGATATATTT
ATGTATGGCAGTCAATCTTCCTTCGTG
>Jr01_18750_p1
TAAGGCGAGGCTAATTATATATTATAGCTACTTTTCTTTCAGTTTTGATTTTAATTTTCT
TCCTGCTGGTAAGATGTTTTTCCTCTCTTTTGGGCTCGAAGAAGTGAGAATATTATACGT
GTTCGTTTTT
>Jr01_22930_p1
TGAATTGTAGTTACGTAGGATCAGAAGGTATTGTATCACTCTGATGATGAGGCACATAGC
AATAACTATATATGAAAGTACTTGATAATGTATGATCGTATGCCCTCTCAAAGATTGGTT
CACATCGGTCGAGAATCAAATGCATATTTCTTCTTACTTCTT
>Jr02_04990_p1
TATGACGTTAAACTTGAACGATAAATAATTCCAATGTTGTTTATTTTGTGGTCTCGACTT
TTCTGTAAGACATGATCAAGAAATTTGTACTGCTTGAAGATGGTGATAGCAAGATAGAGA
AGTTGAATAAGATTTTTTCCTTAATATTTTTGTTTT
>Jr02_17180_p1
CCCCTACAGTTAGGGCAGTGCGGGCCAGTGGGTTAATGTCTGGCCTCATATAAAAACTCT
TATAAAATCCAACTTGACATACATATATAACTGTACCGATTAAAGAAAATTAATGATTAG
AGATGATGTTTTCCTAATCCTTATTTTAATGATGGTGGAAATTAAGTAGATCTACAGTAA
TGTTTGGTTTAAGTCGGATCGTTCAACCCAACTTTCTTGATATACCCTACATTCTTCACA
AACGCACGTCTTTGTCCGATGCCTGAAAGGCCCTTTTAGCCAAGTTGGACTCTAAATTAC
AAGACAAGAACGGATGAGAGAAAAAAGAAGGAAAAATAAAATTACAATTTCAATCTGTGG
CGAGAACTGCAACAGCTTGAGTATGTGATCTGCGTGCAGATGCCCCTTCGTG
>Jr02_17190_p1
TCCTAATCCTTATTTTAATGATGGTGGAAATTAAGTAGATCTACAGTAATGTTTGGTTTA
AGTCGGATCGTTCAACCCAACTTTCTTGATATACCCTACATTCTTCACAAACGCACGTCT
TTGTCCGATGCCTGAAAGGCCCTTTTAGCCAAGTTGGACTCTAAATTACAAGACAAGAAC
GGATGAGAGAAAAAAGAAGGAAAAATAAAATTACAATTTCAATCTGTGGCGAGAACTGCA
ACAGCTTGAGTATGTGATCTGCGTGCAGATGCCCCTTCGTG
>Jr02_25510_p1
GATTGTTTTCAATGAAAAGAGAACAGAAATTGCTGTGTGATTTTATCATATTCAATTATT
TTTCAACTTTCCCTCCCTTCATTTCGGCGGTTAAGGACAACAAGGCAAGAGTCTCTAGAG
GATAATAAGATTCCTTTTACATGTTACTTTAGTATCTGAGTGCTGTTCTTGATATCGACT
GCCTCCCTGCAAATATGCCTTACCAAGTCCAATACTGTTTGTATAATGTTGACTTCTTTG
AGAATACTCTGTATAAATATGAATTTTTAAGACTGGTATTATTATCTGACAGGAAGACAT
TCTTGTAACTCAAAAGTACTTGTAAGATATTGGTGAGAGATATAGTTTCGTTTTATCTTT
TTACTGGAATTGTATGTCGACAGGAATGTATTTACTTGTAACGAATTGAAGTCTTTCCAG
AGTCTTTTAAATGTCAGAGAATTCACCTTTGTGCCCTGCTCGCATGATTATGAT
>Jr02_26760_p1
ACTTCTGTTTTCTGTTTTCTTTGGGAAACGTAGAAATGTGTACCTTTCTATTATATAATA
GACATATATGGGTATTTTATTTAGTGAT
>Jr03_08810_p1
CACGCGTGTATCTGGACCCACCCTAACACGTCCCCTTCCCCCCCCTCCGCCCAGTTTGTC
AAATTGTGCGCGTTTCGTGCGCCATAAGACACCAATTCTTTTCTCTATGTTTACATTGTT
TTTCTTTTTTTTTGTAATTTTTTTCATTAGAAAAAGAATTTGTCTTTGTTTTCAGCTCCG
TAAATGAATGAATGATAATAATAATAATAATAATAATGTCTTTATTTTTT
>Jr03_11540_p1
GTGATAATTAAAGGAACAAACTTTTTTTTCTTCTTCCGTGTATTTACCGATCGAGAAAGT
TGAATAAAATTATTCAGAATGAAACAATTAATTAGCTAGAAACAATGAGAACTCGTGTTC
TCACCCTTCCCCCAACAAGGATAAAAAAAATATGAACATGTAATCACATTCTCATCCCGC
CCAAAAAAAAAAAACGATCGAAGAAAAACTTGACAAGGAGAAACTAATTAACAATTAAGG
ACGAAGAAAATTATCAGATCGATCAACAACTT
>Jr03_11550_p1
CTTCCGTGTATTTACCGATCGAGAAAGTTGAATAAAATTATTCAGAATGAAACAATTAAT
TAGCTAGAAACAATGAGAACTCGTGTTCTCACCCTTCCCCCAACAAGGATAAAAAAAATA
TGAACATGTAATCACATTCTCATCCCGCCCAAAAAAAAAAAACGATCGAAGAAAAACTTG
ACAAGGAGAAACTAATTAACAATTAAGGACGAAGAAAATTATCAGATCGATCAACAACTT
>Jr03_17800_p1
TTATACCAGACCTTGAATATAGAAGAAGTGCACCATATAAACTAAAAAATGAGTCTTTAG
TGGGGAAATTGCTCTGTATCGTTTCAAATGCCTTG
>Jr03_22520_p1
TTGACACCATGCCCTGAAAACTTCACCAACCCATCATTCGATCAGACAAAGTAGGTCGGG
TGAGAGTTCAAGGGGATCAGAAGCCAGACGACTAATGCGATCAGAAATGATGGATCAGTT
TTCCTCTCCTCCAAATCGAATTCTCGATGAAGACTACTTTTCTTTCCTTTTATTTGCTCT
TCTCCTTGTGGGTAACAAAGATTATTAGATGGTAGCACAGTTGTCACTTAAGCCTATCCA
ACTTTCTGCCTCACAGCTTTTTACTACAGTATCTCTTTTGATTGTTTAACACTCCATATA
ACAAGTAGACTTGAATTCCACATCAGGTGTTATATGTATGCACTCTAGTTTCATTCAGCT
TCTTGAATTATTGTTTATACTTTACAACCTATGTGCTCATATCACATAGACGTGGAAGAA
CATTCAAAATGTAAGATTCTTTAATTTCTCCTTCCAATGAACCTCATGACTTCAGATTT
>Jr03_27180_p1
AAAATAATAATAATAAGATCGAGAAGAGTAAATACGTTGGCCTGAAAAATACATACAAGA
AATATTTTGTTGCATTCAGAAAAGGCTACCCGTACGTATAATAAATATTACTACCAAAAC
GAACGCACCCATCGGAGTCTGTTGACTACCCAAAACGCATACTCCGATGGTTGCGTTTTT
TGGGTAGAACTTACAAGGAAAACACACCAA
>Jr04_00630_p1
CGGGTCCGTCTTCCTTGCAAGTTCAGAAAGAAAATGTATTCCTACATCCAAATGTCCAAA
AAAAAAAAAAAAAAATTTGGCTTTGTTTGTTAAATAGATGTAGGTAGGTATAGCCTATGA
AAAAATGAAGGTAGCTAGCTCTCCCTCCGTGTACAAATTATGTATGTAAGGCTTCGTTTG
GAACCACAATTCCTCTC
>Jr04_03880_p1
AAGATCAAGAACACTACATCTTTATAAACAAAATTTAAAATAGATTAGGATTAAAAAACA
TCGTCATTTTTCTCACGCATAGTGTGCGGCTAGTGTTACAACAAGCTTTGAGGCAGCACG
GTGAAGAGGCTGTATAGAGACAGATATGTTTCCATAGAATAATCTGAGCTACCCCCACAA
GAGGAGAAAAGAAAGAAACAGAGTCTTTGGTCAACAATCTGTGAGATTTAGAGTAAAAAT
GATCCACCATTGCTGATCACATAAGTCATCTGGCTTCTAATGCCCTTAACCTCTATCAAA
CTTACACTACCATATCAAATAATGGATTTGGTGAAGATTTCAGTGCACACAGTCAT
>Jr04_03890_p1
ATAAACAAAATTTAAAATAGATTAGGATTAAAAAACATCGTCATTTTTCTCACGCATAGT
GTGCGGCTAGTGTTACAACAAGCTTTGAGGCAGCACGGTGAAGAGGCTGTATAGAGACAG
ATATGTTTCCATAGAATAATCTGAGCTACCCCCACAAGAGGAGAAAAGAAAGAAACAGAG
TCTTTGGTCAACAATCTGTGAGATTTAGAGTAAAAATGATCCACCATTGCTGATCACATA
AGTCATCTGGCTTCTAATGCCCTTAACCTCTATCAAACTTACACTACCATATCAAATAAT
GGATTTGGTGAAGATTTCAGTGCACACAGTCAT
>Jr04_13770_p1
AATTATTCTCTGATAATTTCCTCGTTCTAATGAAATGTTTTTTTTTTCTTGTCAAGTTTT
TCTTTTTTTGGGGGATGAGAATGTGATTACATGTTCATATTTTTTGTCCTTGTTGGGGAA
GATCAGGAGGGCTAGAGTTCTTTATTTCTAATTGTTTCATTCTGAATAATTTGATTCAAC
TTTCTCGGTACATAGTATACACAGGTAAAAAAAAAATAGCTCGTTCTTACATAATTAATT
TTGACTT
>Jr05_06670_p1
TTTTGCAAGCGTTGGACACTGAAGGAGAAGGATCAAAACAATAAAAATGAAGCACAGGTT
CATTAATTTATTGCAATTTTTTTGTTTGTTTGTTTGTTTTTGTTGGTGTATATTCCCACA
GGGATATTGGTTTTGTACATCCAAAAAATGTATGTTATAGACAAGATTCCCAACTTTATT
CTTTGATTGTTTGGGGGTTGGGGGGGCTCTCTTGGCTAGAAAACTTGATAGCCTGAAAAA
TCACTTTTTGTATCTCTTTTCATTCATTCCTAGTAAAGTAAAGAAAGAGTTCATGTTGCC
TGGGGTCAATGTTGAATC
>Jr07_11780_p1
ATTAATGGTTAATTTATCTGTTAATGGTATGTGATTCTCTGACTCGTATGAGTTTTGTCT
TCAGGGAAGAACCCACTTCGACATTTCATATAGATCTTCTGGATTATCAGTGTAAAATGA
CTAGCCTTTTAGCCTTGGAGGGACTCGTTTTGGGTTGGGTTGTTTTTTTATTTTTAATTC
TTTGTACTTGGAGATTATTCAATTATGGATATATATTTGTATCTTTTCCCTCCTGT
>Jr07_12950_p1
ACCCAATAGCCCAAACAATTTCCGGGGGGAACATCTTATTATATGAAACATGCACGTGTT
CTTTCCTTGAAAGGCCGAGGCATCCAGTACTTTCTTATTTCGTCAATTACAGCAAGTAGT
ACTA
>Jr07_32310_p1
ATTCCAACATAGAAAATGAATACCGAGTGTTTTATTCTTCGTGAACCTATTTTGAGGTTT
AGGATGCTCGTGTAAATATAAAGTTGGATAGGAGGAGAAAGGAGTTTGGAACCTATGCTA
TTGAACTTCCTCAACTGGGAGGAATATTGTATCTTGCAAACTGCATTGACTGTTAGCTGG
GAAGGTTAAATGCTAAGCAAGCCTTCAATTGAGCCAGAGGCATAGGTTTCCGTAGTTTCA
TGTTTGAGCATTAAAATGTTTAGAGCAAATGGAAACTCCTGGTCACAGTTCTGGAAATCT
TTTT
>Jr08_00870_p1
AAAGCAAAAATTTCGACAAAGAGTACATTAATGTCATAACCTTAATTGCTGAAAAATATA
CAAAGAAAACTACCCATATTCACGAGCCCTTAAAGCTCAATACAAAGAGGTACTGTAGAA
CCAAAAAAAAAAAAAAAGAAAAGAAAAAGATCCATTACTTTCGAATTCTATTTACAGTAG
CCCTACGTACGCTAGCTATTTCCGAGTGCATGGAGCCAGAAAACAACAATATATATAAAC
TGTCTATATAAGTGTACTCCTAATGTCACGATTTT
>Jr08_11260_p1
AAAGAAGGAATAATAAGATCACAATTTTTTCTGTAATTTCTATCCATCTCTACATATACC
CAAAACCTTCCATGAAAAAGATGGAAAAAGCTAACCAAATGGAGATCGAGAACTAGTCTC
TGCTCTAGATAAAAAAACAAAAAAACGAAAAAACCCATGTTAACAGTGATAATGATCATC
AGCGCGCGTTTTGTGTACAATGGGGAAGTGGGTTCTAAAAGAAGATCATCACCACCAGCC
GGCAAGAAGATTGCATACCAGTAATCATGTGGGGGCATTCATCTATGGTCTTCACCTATA
AAAGTCAGTGAACAGAACAAATTTACTTCAAAACTAGCAAACGGTTTTGATCCT
>Jr08_14560_p1
TGCACATTTATTTTTCATTACAGGAAGACAGAGAACTGCTTGATTG
>Jr08_14570_p1
AGTTTCTCATCTTGAAAATTTTGGTTTGCTTGTGTAGTGGTCGGCAATAGCTTGGAATTT
TGTTTTCCTTTTTGTAGTGATTGAAGGTGACAATGCATCGCCTATTCATAAGTTATTTTT
TCATAAACATCATTGAGGAAAAATGTTCATACAAGTTGCGTACAATCTCTCTAACTAGTG
CTTCATAGTTCT
>Jr09_09980_p1
TTCCACTTAAGCTCTAAAATAAGAATAAAAACGGCATGTGGGATGCATCCACCTGTTGAA
TCTAGCTTTTGTATTATAATTTATAAAGGAAGGGATGTTTTTGTTGAATATATAAGATCC
TCCTTAAAGTTT
>Jr09_16000_p1
GATTCTTTACAATGCAATGATAACAAAAATAAAATACGGTGTGATTTATTTTTTATTTTT
TACTTATATGTATTTTCCTTTCTTTCTTCAGCAGTTGAGGACAAGAAGACGAGTCTCTAG
ATGAAACAGGATTCGTCTTAATTTTACCTTAATATCTGAGAGCTGTTCTTGACATTGACT
GCCCCCAGCAAATTTCTTTTAAGTCCAATACTGTTTGTATAATGTTGACTTCTGGGTGAA
ACTCTGTATAAATATGAAATTAAGACTGGTGTATGATTTTCTGACAGGAAGACTTTATTG
TAACTTAAGAACTTGTACGATATTGGAAGGAAGTATGGTTTCATTTTCGCTTTCT
>Jr09_16010_p1
GATTCTTTACAATGCAATGATAACAAAAATAAAATACGGTGTGATTTATTTTTTATTTTT
TACTTATATGTATTTTCCTTTCTTTCTTCAGCAGTTGAGGACAAGAAGACGAGTCTCTAG
ATGAAACAGGATTCGTCTTAATTTTACCTTAATATCTGAGAGCTGTTCTTGACATTGACT
GCCCCCAGCAAATTTCTTTTAAGTCCAATACTGTTTGTATAATGTTGACTTCTGGGTGAA
ACTCTGTATAAATATGAAATTAAGACTGGTGTATGATTTTCTGACAGGAAGACTTTATTG
TAACTTAAGAACTTGTACGATATTGGAAGGAAGTATGGTTTCATTTTCGCTTTC
>Jr10_04760_p1
AGTTCAAAGTTCGAGGCAGTTGTGCCATCTCTTTTTGACATTAACCGAGGAGGGGAGGCA
GGTGGCCGGTTACATATATAAATCGAATGATGATCATGTGATCATGATGAAGACAGCTTC
AAAAAGGAGTGTAAAATTGCAGAGAAAATATACTTACAATCGTGAATTGTGTAACCATCG
CGTAATCGTTTTGAAAAAAATGAATAAAACATGGGACTCACATGAAAAAAATTAATTTTT
TAATAGTGGATCTCACTCTTTTTCAAAGCGATTACGCGGCGATTACGCACTTCACGGTTG
TATGTAGAATTACTCAAAATTGCATCTGACTCAAAATATGTTCGAAGTTATCAGTTGGCT
TCTCTATTGGATGGATGTGCACCCCTTCATAAGTAGTCACTACGATGCCTTCATCTTTGG
TTAGGCGTTGAACTTGCTTCT
>Jr10_04790_p1
AGTTCAAAGTTCGAGGCAGTTGTGCCATCTCTTTTTGACATTAACCGAGGAGGGGAGGCA
GGTGGCCGGTTACATATATAAATCGAATGATGATCATGTGATCATGATGAAGACAGCTTC
AAAAAGGAGTGTAAAATTGCAGAGAAAATATACTTACAATCGTGAATTGTGTAACCATCG
CGTAATCGTTTTGAAAAAAATGAATAAAACATGGGACTCACATGAAAAAAATTAATTTTT
TAATAGTGGATCTCACTCTTTTTCAAAGCGATTACGCGGCGATTACGCACTTCACGGTTG
TATGTAGAATTACTCAAAATTGCATCTGACTCAAAATATGTTCGAAGTTATCAGTTGGCT
TCTCTATTGGATGGATGTGCACCCCTTCATAAGTAGTCACTACGATGCCTTCATCTTTGG
TTAGGCGTTGAACTTGCTTCT
>Jr10_25600_p1
CTAATAAAACTCTTGTTGCAGAAAAGTCACCGTTGCCCTTGTAATGGTATCTCTTGACAT
GGCACGGCAAGTGATTAGTACTAGTAGCGGGTTTTCCTCCTTATTTACCCCATTTCTTTT
TCTTGGGGTTTTGGGGGGTGAGCATGTAGACGATTTATCTGGGTCAAAAAATAACACGTA
GATTTCGCCAAGTACTGAATATATGAATATGATTGCTCCTTTTACT
>Jr11_16130_p1
TCAAGGTTGTTAATTGTAGCAAGATAAGATGGGATGGGATGATTGTAAACGAAAGTTGAA
AATTGAATAAAATATTATTATTATTTTAAATTT
>Jr11_16330_p1
AGAAGAGATCATTAACCAATTACTACTCCTTTTTATGTTGTTTTGTTGATCACTGACTTT
GTAGGAAGATGATCAGAAAGCCCCACATTCCTGGTATGCAATCTTCTTGCTGACAGGATT
GGATCTTTCTTGTAGAACCCACTTCTCATTGTACACATGTACACGGATGATTGTCGCTGT
TAACATGCGATTCTTCTTTATCCAGTGCAAGGACTCGTTTCTTAATTATTTAGTTAACTT
TCTCCGTCTTTTTGGCCGGTATGTTTTGGGTGTACGTAGAGATGATAAAAATCACAGAAA
CTTGGCTGATTTCATTGTTTTGAGT
>Jr11_17180_p1
ACTGCGTACGTAGTAGACCAATCTAATTAATTAATCAGATCATGTGAATCCGTGAGAACG
CCAGAACCCTAAAAGCTGGAACGAAATCGAAACAGCACGTCCAAGCTAGCTAGCTTGCCT
TATGGTAACTACGAAATGATCATCTCATCTTTAGTTTCCTGTACAATATTAGCTAGAATA
TTACTGTAACATACTCCTATAAACATGGGATCCTTCCTTCTCTCTCAAATCAATTAAGAA
AGGTTGA
>Jr11_30180_p1
CCACCCACCAGCCTAAATTACCAAAGCTTTGAAGTGATCGATCAACATCATACATGATCT
TTGTAACTGTAAAGAGATGAAAATAGCCTGGAATCTGTGCTTAATTAAGAGTGATAGTGT
TCTTTTGGGTGTTGATTAATAGTGTTGAGAATAAAGTTTCATCCTTGTAAAGATAAAATA
TGGAGGGATAAAGGGAAAAGGGCACTTGTGTTTGCTATAAAGTTTGGGTTCATCATTTTT
CTATTCAACTG
>Jr12_04410_p1
CTTTGGGGAATGTCAAAATGTGACATGGATTATGCTTTTTGGTTTTTGTCTTCTCTTTAT
GAACACTTTTTCTAGATATAGAGTTCTATTTTGTTAAAAGTCTTAGTGGAATCTTAAAAT
TTTAGTGATCAGTTCAGTATAGTTAGGGAAAAAAGGTGTCATTTCTGTGTCACTGATCAT
GAGAGACTGGAATGAAGAAAAGTAGTGAGGTAGAGAAATCACTGCTTGTCTTTTGTTTT
>Jr12_10150_p1
GGAATGGGAAAACCCTAACCCTAAATATTCTGGCAACTATATATATATATATATATTACA
TAGTACCCCTCCATAATGCCAATGCATGCATATACCCCGAGAAGAAGATGAAGATCCAGG
AGGGAAAAGATACAAATATATATCTCCAAAGTTGAAGAATCTTTAAGTACAAATTAAAGA
ATTACAAAAAAACAAAAAAGAACCAACATAAAACGCGCGAGTCCCGTCAAAGTCTAGTGA
TTTTACTGTCATGATAATCCATAATTAGTAGATATCTATATGAAACGGTGAACTGGGTTC
TTCCCTGAAGACCAAACCCTCATGAGTCAGCGAATTACATACCATTAGAAGACAAACCAA
CCATTAATTAATTAAT
>Jr13_05050_p1
GGAAAAGAAAAATTGCATTATTGTATGTTGATCTTATTTAGCAAAGAACCAAATCTTAAC
AGGATGATTATAATACAAATTAATTAAGTCTGTGTATACAATTCCGACTTTTTGAAAAAA
AAGAAAACTAATACCTGAAGAAATTCTTGGATCA
>Jr14_08090_p1
GATTTATTGGGAAGGCGTTGGACTTTGGGAGGAGTAGGATCAAAAGAACAAGAAGGAAAA
AAAGAAGAAGATCAAAATAATTTAATTTATTGCAATTTGTTTGTTTTGTTGTTATATATT
CGTACAGGGATGTTGGTTTTGTATATGCCAGTTTTATAGATAAGATTCCCAACTTTTTGA
TTTTTTCGATTGTTTTGAGGCCCCTCTTGGCATAGAATCGAACAGCCTCAAATACACTTT
GTATCACACATGGTAGTGATATTTTTCTCTTTGTACCTAGTAAAGCAAAGAAAAGTTGGA
GTTCATGTTTGTAGGGCAAAAGACAAATCAATCAAAAACATGTTATTTCTGTTTTATTTT
CC
>Jr14_08100_p1
GATTTATTGGGAAGGCGTTGGACTTTGGGAGGAGTAGGATCAAAAGAACAAGAAGGAAAA
AAAGAAGAAGATCAAAATAATTTAATTTATTGCAATTTGTTTGTTTTGTTGTTATATATT
CGTACAGGGATGTTGGTTTTGTATATGCCAGTTTTATAGATAAGATTCCCAACTTTTTGA
TTTTTTCGATTGTTTTGAGGCCCCTCTTGGCATAGAATCGAACAGCCTCAAATACACTTT
GTATCACACATGGTAGTGATATTTTTCTCTTTGTACCTAGTAAAGCAAAGAAAAGTTGGA
GTTCATGTTTGTAGGGCAAAAGACAAATCAATCAAAAACATGTTATTTCTGTTTT
>Jr15_12660_p1
GGAGAAAGCCAATCTCAACCTACAAAATCCATTTTTTTAAAGGCCAATTCTATACTGTTA
CACTACTATTAACCCTACTCCAAACAAGAGGGCGTACCATATTAAATATACACAACTGTT
GCTGAAAAACTATGGCAAAAGTGGGTGGAAAAACATTAGAATAAGGAAAGACGAGCAAAC
CAAACCTGCCAATTTAATAACTTACATAGATACAGCTGCATGATCTTCTAAAAGAGAGGT
CGGTCAAGCTTTTTTTTTTTTTTCAAATTATTCGGATGGGCTTTCCAGCAAAGGAGCCT
>Jr15_12660_p1
GGAGAAAGCCAATCTCAACCTACAAAATCCATTTTTTTAAAGGCCAATTCTATACTGTTA
CACTACTATTAACCCTACTCCAAACAAGAGGGCGTACCATATTAAATATACACAACTGTT
GCTGAAAAACTATGGCAAAAGTGGGTGGAAAAACATTAGAATAAGGAAAGACGAGCAAAC
CAAACCTGCCAATTTAATAACTTACATAGATACAGCTGCATGATCTTCTAAAAGAGAGGT
CGGTCAAGCTTTTTTTTTTTTTTCAAATTATTCGGATGGGCTTTCCAGCAAAGGAGCCT
>Jr15_12670_p1
CAACCTACAAAATCCATTTTTTTAAAGGCCAATTCTATACTGTTACACTACTATTAACCC
TACTCCAAACAAGAGGGCGTACCATATTAAATATACACAACTGTTGCTGAAAAACTATGG
CAAAAGTGGGTGGAAAAACATTAGAATAAGGAAAGACGAGCAAACCAAACCTGCCAATTT
AATAACTTACATAGATACAGCTGCATGATCTTCTAAAAGAGAGGTCGGTCAAGCTTTTTT
TTTTTTTTCAAATTATTCGGATGGGCTTTCCAGCAAAGGAGCCT
>Jr16_14290_p1
GAAATGACAAATTGAGACGACATAGTATCATTTTCTTAATATAAATCTAATCAATGAAAA
TGCGTTTACACGCCAGTTTTTTTAATCCACAAACTGTAAAGCATGCATGCATCCGATCCT
GATCAGGCAGGATTCTAATTTTTTCCCGAAAAAGCAGGACGAAGATCATCACAAATATAG
CTAGCTGCACGTACGATTTCATCAGGATAAGTTTCATTTAAGACGAAATTACATGTTTTT
GGTCACTACAGACGTATAAAAAGAGCTGATCAAGGGGTCATGTAATCCTGATGGCTTTGC
TTTTATTCTGAGGAATTATTTAAAAACACAGAATTTACACAAGTATTCATCTCGAGTACT
TGATCTCTGATCGATGATCATTTGCATGCAAGTTCCCGATCTCTTCCT
