# Supplementary material for: Genome-Wide Identification and Transcriptional Expression Profiles of Transcription Factor WRKY in Common Walnut (Juglans regia L.)
Source: Genes (Basel). 2021 Sep 19;12(9):1444. doi: 10.3390/genes12091444 (PMC8466090; doi:10.3390/genes12091444)
Supplement: Supplementary file 1 [file genes-12-01444-s001.zip › TableS14.xlsx]

## Sheet: Sheet1
TableS14. The predicted miRNA and traget geens interation network
Gene id1	Gene name	MiRNA	Subseq1	Subseq2	Start1	End1	Start2	End2	Evalue
Jr01_18750_p1	JrWRKY8	Jre-miR156a	UGUUUUUCCUCUCUUUUG	CAGAAGAGAGUGAGCA	75	92	4	19	-9.52
Jr01_18750_p1	JrWRKY8	Jre-miR156b	UGUUUUUCCUCUCUUUUG	CAGAAGAUAGAGAGCA	75	92	5	20	-3.68
Jr01_18750_p1	JrWRKY8	Jre-miR156c	UGUUUUUCCUCUCUUUUG	CAGAAGAUAGAGAGCA	75	92	5	20	-3.68
Jr01_18750_p1	JrWRKY8	Jre-miR156d	UGUUUUUCCUCUCUUUUG	CAGAAGAUAGAGAGCA	75	92	5	20	-3.68
Jr01_18750_p1	JrWRKY8	Jre-miR156e	UGUUUUUCCUCUCUUUUG	CAGAAGAUAGAGAGCA	75	92	5	20	-3.68
Jr01_18750_p1	JrWRKY8	Jre-miR156f	UGUUUUUCCUCUCUUUUG	CAGAAGACAGAGAGCA	75	92	5	20	-3.56
Jr01_18750_p1	JrWRKY8	Jre-miR156g	UGUUUUUCCUCUCUUUUG	CAGAAGAGAGAGAGCA	75	92	5	20	-10.06
Jr01_18750_p1	JrWRKY8	Jre-miR156h	UGUUUUUCCUCUCUUUUG	CAGAAGAGAGUGAGCA	75	92	4	19	-9.52
Jr01_18750_p1	JrWRKY8	Jre-miR156i	UGUUUUUCCUCUCUUUUG	CAGAAGAGAGUGAGCA	75	92	4	19	-9.52
Jr01_18750_p1	JrWRKY8	Jre-miR156j	UGUUUUUCCUCUCUUUUG	CAGAAGAGAGUGAGCA	75	92	4	19	-9.52
Jr01_18750_p1	JrWRKY8	Jre-miR156k	UGUUUUUCCUCUCUUUUG	CAGAAGAGAGUGAGCA	75	92	4	19	-9.52
Jr01_18750_p1	JrWRKY8	Jre-miR156l	UGUUUUUCCUCUCUUUUG	CAGAAGAGAGUGAGCA	75	92	4	19	-9.52
Jr01_18750_p1	JrWRKY8	Jre-miR159a	UAUAGCUACUUUUCUUUC	GAUUGAAGGGAGCUGUA	23	40	5	21	-11.7
Jr01_18750_p1	JrWRKY8	Jre-miR159b	UUUCUUUCAGUUU	GGACUGAAGGGAG	33	45	3	15	-8.31
Jr01_18750_p1	JrWRKY8	Jre-miR159c	UUUCUUUCAGUUU	GGACUGAAGGGAG	33	45	3	15	-8.31
Jr01_18750_p1	JrWRKY8	Jre-miR159d	UUUCUUUCAGUUU	GGACUGAAGGGAG	33	45	4	16	-9.3
Jr01_18750_p1	JrWRKY8	Jre-miR159e	UUUCUUUCAGUUU	GGAUUGAAGGGAG	33	45	4	16	-8.62
Jr01_18750_p1	JrWRKY8	Jre-miR159f	CUCUCUUUUGGGCUCGAAG	CUUGGAGUGAAGGGAG	83	101	1	16	-5.12
Jr01_18750_p1	JrWRKY8	Jre-miR159g	UUUCUUUCAGUUU	GGACUGAAGGGAG	33	45	3	15	-8.31
Jr01_18750_p1	JrWRKY8	Jre-miR159h	UUUCUUUCAGUUU	GGACUGAAGGGAG	33	45	3	15	-8.31
Jr01_18750_p1	JrWRKY8	Jre-miR159i	UUUCUUUCAGUUU	GGACUGAAGGGAG	33	45	3	15	-8.31
Jr01_18750_p1	JrWRKY8	Jre-miR159j	UUUCUUUCAGUUU	GGACUGAAGGGAG	33	45	3	15	-8.31
Jr01_18750_p1	JrWRKY8	Jre-miR159k	UUUCUUUCAGUUU	GGAUUGAAGGGAG	33	45	4	16	-8.62
Jr01_18750_p1	JrWRKY8	Jre-miR164a	UACGUGUUCGUUUUU	AGAAGCAGGGCACGUG	116	130	4	19	-9.61
Jr01_18750_p1	JrWRKY8	Jre-miR164b	UACGUGUUCGUUUUU	AGAAGCAGGGCACGUG	116	130	4	19	-9.61
Jr01_18750_p1	JrWRKY8	Jre-miR164c	UACGUGUUCGUUUUU	AGAAGCAGGGCACGUG	116	130	4	19	-9.61
Jr01_18750_p1	JrWRKY8	Jre-miR164d	UACGUGUUCGUUUUU	AGAAGCAGGGCACGUG	116	130	4	19	-9.61
Jr01_18750_p1	JrWRKY8	Jre-miR164e	UACGUGUUCGUUUUU	AGAAGCAGGGCACGUG	116	130	4	19	-9.61
Jr01_18750_p1	JrWRKY8	Jre-miR166a	GUUUUGA	UCAGGAC	42	48	2	8	-4.88
Jr01_18750_p1	JrWRKY8	Jre-miR167a	UGCUGGUA	UGCCAGCA	64	71	7	14	-6.01
Jr01_18750_p1	JrWRKY8	Jre-miR167b	UGCUGGUA	UGCCAGCA	64	71	7	14	-6.01
Jr01_18750_p1	JrWRKY8	Jre-miR167c	UGCUGGUA	UGCCAGCA	64	71	7	14	-6.01
Jr01_18750_p1	JrWRKY8	Jre-miR167d	UGCUGGUA	UGCCAGCA	64	71	7	14	-6.01
Jr01_18750_p1	JrWRKY8	Jre-miR167e	UGCUGGUA	UGCCAGCA	64	71	7	14	-6.01
Jr01_18750_p1	JrWRKY8	Jre-miR167f	UGCUGGUA	UGCCAGCA	64	71	7	14	-6.01
Jr01_18750_p1	JrWRKY8	Jre-miR167g	UGCUGGUA	UGCCAGCA	64	71	7	14	-5.97
Jr01_18750_p1	JrWRKY8	Jre-miR167h	UGCUGGUA	UGCCAGCA	64	71	7	14	-5.97
Jr01_18750_p1	JrWRKY8	Jre-miR168a	UUUUGAUU	GGUCGGGA	43	50	13	20	-1.14
Jr01_18750_p1	JrWRKY8	Jre-miR169a	AGGCGAGGCUA	UAGCCAAGGAUGACUUGCCU	3	13	1	20	-3.53
Jr01_18750_p1	JrWRKY8	Jre-miR169b	AGGCGAGGCUA	UAGCCAAGGAUGACUUGCCU	3	13	1	20	-3.53
Jr01_18750_p1	JrWRKY8	Jre-miR169c	AGGCGAGGCUA	UAGCCAAGGAUGACUUGCCU	3	13	1	20	-3.53
Jr01_18750_p1	JrWRKY8	Jre-miR169d	AGGCGAGGCUA	UAGCCAAGGAUGACUUGCCU	3	13	1	20	-3.53
Jr01_18750_p1	JrWRKY8	Jre-miR169e	AGGCGAGGCUA	UAGCCAAGGAUGACUUGCCU	3	13	1	20	-3.53
Jr01_18750_p1	JrWRKY8	Jre-miR169f	AGGCGAGGCUA	UAGCCAAGGAUGACUUGCCU	3	13	1	20	-3.53
Jr01_18750_p1	JrWRKY8	Jre-miR169g	AGGCGAGGCUA	UAGCCAAGGAUGACUUGCCU	3	13	1	20	-3.53
Jr01_18750_p1	JrWRKY8	Jre-miR169h	CGUGUUCGUUUUU	AAGGAUGAAUUGCCG	118	130	6	20	-4.65
Jr01_18750_p1	JrWRKY8	Jre-miR170a	GGCGAGGCUAAU	AUUGGCCUGGUU	4	15	2	13	-7.85
Jr01_18750_p1	JrWRKY8	Jre-miR170b	GGCGAGGCUAAU	AUUGGCCUGGUU	4	15	2	13	-7.85
Jr01_18750_p1	JrWRKY8	Jre-miR170c	GGCUCGA	UUGAGCC	93	99	1	7	-6.98
Jr01_18750_p1	JrWRKY8	Jre-miR170d	GGCUCGA	UUGAGCC	93	99	1	7	-6.5
Jr01_18750_p1	JrWRKY8	Jre-miR170e	GGCUCGA	UUGAGCC	93	99	1	7	-6.98
Jr01_18750_p1	JrWRKY8	Jre-miR170f	GGCUCGA	UUGAGCC	93	99	1	7	-6.51
Jr01_18750_p1	JrWRKY8	Jre-miR170g	GGCUCGA	UUGAGCC	93	99	4	10	-5.69
Jr01_18750_p1	JrWRKY8	Jre-miR170h	GGCUCGA	UUGAGCC	93	99	4	10	-5.69
Jr01_18750_p1	JrWRKY8	Jre-miR170i	GGCUCGA	UUGAGCC	93	99	4	10	-5.69
Jr01_18750_p1	JrWRKY8	Jre-miR170j	GGCUCGA	UUGAGCC	93	99	4	10	-5.69
Jr01_18750_p1	JrWRKY8	Jre-miR170k	GGCUCGA	UUGAGCC	93	99	4	10	-5.69
Jr01_18750_p1	JrWRKY8	Jre-miR170l	GGCUCGA	UUGAGCC	93	99	4	10	-5.69
Jr01_18750_p1	JrWRKY8	Jre-miR170m	GGCUCGA	UUGAGCC	93	99	4	10	-5.69
Jr01_18750_p1	JrWRKY8	Jre-miR170o	GGCUCGA	UUGAGCC	93	99	4	10	-5.51
Jr01_18750_p1	JrWRKY8	Jre-miR171a	GUUCGUU	AACGAAC	121	127	14	20	-5.44
Jr01_18750_p1	JrWRKY8	Jre-miR390a	UCUCUUUUGGGCU	AGCUCAGGAGGGA	84	96	2	14	-8.82
Jr01_18750_p1	JrWRKY8	Jre-miR390b	UCUCUUUUGGGCU	AGCUCAGGAGGGA	84	96	2	14	-8.82
Jr01_18750_p1	JrWRKY8	Jre-miR390c	UCUCUUUUGGGCU	AGCUCAGGAGGGA	84	96	2	14	-8.88
Jr01_18750_p1	JrWRKY8	Jre-miR393a	UCAGUUUUGAUUUU	GGGAUCGCAUUGA	39	52	7	19	-2.71
Jr01_18750_p1	JrWRKY8	Jre-miR393b	UCAGUUUUGAUUUU	GGGAUCGCAUUGA	39	52	7	19	-2.71
Jr01_18750_p1	JrWRKY8	Jre-miR393c	CUUUUGGG	UCCAAAGG	87	94	1	8	-0.7
Jr01_18750_p1	JrWRKY8	Jre-miR395a	GUUUUUCC	GGGGGAAC	76	83	12	19	-5.82
Jr01_18750_p1	JrWRKY8	Jre-miR395b	GUUUUUCC	GGGGGAAC	76	83	12	19	-5.82
Jr01_18750_p1	JrWRKY8	Jre-miR395c	GUUUUUCC	GGGGGAAC	76	83	12	19	-5.82
Jr01_18750_p1	JrWRKY8	Jre-miR395d	GUUUUUCC	GGGGGAAC	76	83	12	19	-5.82
Jr01_18750_p1	JrWRKY8	Jre-miR395e	GUUUUUCC	GGGGGAAC	76	83	12	19	-5.82
Jr01_18750_p1	JrWRKY8	Jre-miR395f	GUUUUUCC	GGGGGAAC	76	83	12	19	-5.82
Jr01_18750_p1	JrWRKY8	Jre-miR395g	GUUUUUCC	GGGGGAAC	76	83	12	19	-5.82
Jr01_18750_p1	JrWRKY8	Jre-miR395h	GUUUUUCC	GGGGGAAC	76	83	12	19	-5.82
Jr01_18750_p1	JrWRKY8	Jre-miR395i	GUUUUUCC	GGGGGAAC	76	83	12	19	-5.82
Jr01_18750_p1	JrWRKY8	Jre-miR395j	GUUUUUCC	GGGGGAAC	76	83	12	19	-5.82
Jr01_18750_p1	JrWRKY8	Jre-miR398a	UGAGAAUAU	GUGUUCUCA	105	113	2	10	-5.72
Jr01_18750_p1	JrWRKY8	Jre-miR398b	UGAGAAUAU	GUGUUCUCA	105	113	2	10	-5.72
Jr01_18750_p1	JrWRKY8	Jre-miR398c	GGGCUCGAAGAAGUGAGAAUAU	GUGUUCUCAGGUCGCCC	92	113	2	18	-5.02
Jr01_18750_p1	JrWRKY8	Jre-miR398d	GGGCUCGAAGAAGUGAGAAUAU	GUGUUCUCAGGUCGCCC	92	113	2	18	-5.02
Jr01_18750_p1	JrWRKY8	Jre-miR398e	GGGCUCGAAGAAGUGAGAAUAU	GUGUUCUCAGGUCGCCC	92	113	2	18	-5.02
Jr01_18750_p1	JrWRKY8	Jre-miR398f	GGGCUCGAAGAAGUGAGAAUAU	AUGUUCUCAGGUCGCCC	92	113	2	18	-4.73
Jr01_18750_p1	JrWRKY8	Jre-miR399a	UCUCUUUUGG	CCAAAGGAGA	84	93	3	12	-4.9
Jr01_18750_p1	JrWRKY8	Jre-miR399b	UCUCUUUUGG	CCAAAGGAGA	84	93	3	12	-4.9
Jr01_18750_p1	JrWRKY8	Jre-miR399c	GGUAAGAUGUUUUUCCUCUCUUUUGG	CCAAAGGAGAGUUGCC	68	93	3	18	-7.44
Jr01_18750_p1	JrWRKY8	Jre-miR399d	GGUAAGAUGUUUUUCCUCUCUUUUGG	CCAAAGGAGAGUUGCC	68	93	3	18	-7.44
Jr01_18750_p1	JrWRKY8	Jre-miR399e	GGUAAGAUGUUUUUCCUCUCUUUUGG	CCAAAGGAGAGUUGCC	68	93	3	18	-7.74
Jr01_18750_p1	JrWRKY8	Jre-miR399f	GGUAAGAUGUUUUUCCUCUCUUUUGG	CCAAAGGAGAGUUGCC	68	93	3	18	-7.74
Jr01_18750_p1	JrWRKY8	Jre-miR477e	AAGAAGUGAGA	UCUCAAGGGCUUCUU	99	109	6	20	-1.75
Jr01_18750_p1	JrWRKY8	Jre-miR482a	UUUUGGG	CCCAAAG	88	94	3	9	-2.47
Jr01_18750_p1	JrWRKY8	Jre-miR482b	UUUUGGG	CCCAAAG	88	94	3	9	-2.46
Jr01_18750_p1	JrWRKY8	Jre-miR5675a	UCUUUCAGUUUUGAUU	AAUGGAUUCUGAGGGA	35	50	4	19	-10.11
Jr01_18750_p1	JrWRKY8	Jre-miR7972a	AUUAUAGCU	GGUUGUGAU	21	29	8	16	-3.6
Jr01_18750_p1	JrWRKY8	Jre-miRN745a	GGCUCGA	UUGGGUC	93	99	1	7	-2.09
Jr01_18750_p1	JrWRKY8	Jre-miRN745b	GGCUCGA	UUGGGUC	93	99	1	7	-2.09
Jr01_18750_p1	JrWRKY8	Jre-miRN745c	GGCUCGA	UUGGGUC	93	99	1	7	-2.09
Jr01_18750_p1	JrWRKY8	Jre-miRN5867	UAAGGCGAGG	CCUCGUUUUA	1	10	8	17	-7.82
Jr01_18750_p1	JrWRKY8	Jre-miRN5868	GUGUUCG	UGAAUAC	119	125	8	14	-4.04
Jr01_18750_p1	JrWRKY8	Jre-miRN5869	UGCUGGUAAGAUGUU	GGCGUCUCUUCCUUUGCA	64	78	2	19	-1.29
Jr01_18750_p1	JrWRKY8	Jre-miRN5871	GGCGAGGCU	GGCUUUGGC	4	12	11	19	-5.42
Jr01_18750_p1	JrWRKY8	Jre-miRN5872	CUUUUCUUUCAGUUUUG	CAAGACUGAACCGGAGG	31	47	5	21	-11.88
Jr01_18750_p1	JrWRKY8	Jre-miRN5874	UCUUUCAGUUUU	GGAACGUUUUGAGGGA	35	46	4	19	-4.09
Jr01_18750_p1	JrWRKY8	Jre-miRN5875	GGCGAGG	UCUUGCU	4	10	8	14	-2.62
Jr01_18750_p1	JrWRKY8	Jre-miRN5877	GUUUUUCCU	AGGGAAAAC	76	84	3	11	-8.85
Jr01_18750_p1	JrWRKY8	Jre-miRN5878	GGCUAAUUAUAUAUUA	UGAUGUGAACCAAAGCC	9	24	4	20	-4.14
Jr01_18750_p1	JrWRKY8	Jre-miRN5879	CUUUCAGUUUUGAUUUU	AAGUUCUGAAUCUGAAAG	36	52	1	18	-7.05
Jr01_18750_p1	JrWRKY8	Jre-miRN5880	UUAUAUA	UGUAUAA	15	21	14	20	-1.91
Jr01_18750_p1	JrWRKY8	Jre-miRN5881	CUUUCAGUUUUGAUUUU	AAGUUCUGAAUCUGAAAG	36	52	1	18	-7.05
Jr01_18750_p1	JrWRKY8	Jre-miRN5882	AGAAGUG	CACUUCU	100	106	14	20	-4.38
Jr01_18750_p1	JrWRKY8	Jre-miRN5883	GGCUCGA	UCGAGCU	93	99	12	18	-4.73
Jr01_18750_p1	JrWRKY8	Jre-miRN5884	GUGUUCG	UGAGCAC	119	125	14	20	-3.85
Jr01_18750_p1	JrWRKY8	Jre-miRN5887	AGGCGAGGCUAAUUAUAUA	UGUAUGAUUUUUAUGCCU	3	21	5	22	-4.31
Jr01_18750_p1	JrWRKY8	Jre-miRN5889	UGUUUUUCCU	AGUGAAGAAUA	75	84	10	20	-4.5
Jr01_18750_p1	JrWRKY8	Jre-miRN5890	UGUUCGUUUUU	GAGGAUGAAUA	120	130	4	14	-6.17
Jr01_18750_p1	JrWRKY8	Jre-miRN5894	GAUGUUUUUCCUCUCU	AGAGAGGGCAUC	73	88	10	21	-9.51
Jr01_18750_p1	JrWRKY8	Jre-miRN5895	UGUUUUUCC	GGAGAAGCA	75	83	8	16	-5.93
Jr01_18750_p1	JrWRKY8	Jre-miRN5896	UGUUUUUCC	GGAGAAGCA	75	83	8	16	-5.93
Jr01_18750_p1	JrWRKY8	Jre-miRN5897	UGUUUUUCC	GGAGAAGCA	75	83	8	16	-5.93
Jr01_18750_p1	JrWRKY8	Jre-miRN5898	UGUUUUUCC	GGAGAAGCA	75	83	8	16	-5.93
Jr01_18750_p1	JrWRKY8	Jre-miRN5899	UUUUCUUCCUGC	GUGGGAUGAGAAGA	55	66	4	17	-3.45
Jr01_18750_p1	JrWRKY8	Jre-miRN5901	UUCAGUU	GGCUGAA	38	44	14	20	-4.45
Jr01_18750_p1	JrWRKY8	Jre-miRN5904	UUAUACGUGUU	AAUAUCGUGUGG	113	123	7	18	-4.19
Jr01_18750_p1	JrWRKY8	Jre-miRN5905	CUCUCUUUUGGGCUCG	CGAGGCCUUGGGGGAG	83	98	1	16	-9.93
Jr01_18750_p1	JrWRKY8	Jre-miRN5908	UGCUGGUAAGAU	AUCUUUUAACUGGCG	64	75	8	22	-1.78
Jr01_18750_p1	JrWRKY8	Jre-miRN5909	AGGCGAGGCUAAUUAUAUA	UAUAUAAUCUGAUCCCU	3	21	4	20	-3.67
Jr01_18750_p1	JrWRKY8	Jre-miRN5910	UAUUAUAGCU	GGCUAUAGUA	20	29	9	18	-7.59
Jr01_18750_p1	JrWRKY8	Jre-miRN5911	GGCUCGA	UUGGGCU	93	99	15	21	-2.39
Jr01_22930_p1	JrWRKY9	Jre-miR156a	UGCAUAUUUCUUCU	AGAAGAGAGUGAGCA	141	154	5	19	-9.85
Jr01_22930_p1	JrWRKY9	Jre-miR156g	UGCAUAUUUCUUCU	AGAAGAGAGAGAGCA	141	154	6	20	-9.99
Jr01_22930_p1	JrWRKY9	Jre-miR156h	UGCAUAUUUCUUCU	AGAAGAGAGUGAGCA	141	154	5	19	-9.85
Jr01_22930_p1	JrWRKY9	Jre-miR156i	UGCAUAUUUCUUCU	AGAAGAGAGUGAGCA	141	154	5	19	-9.85
Jr01_22930_p1	JrWRKY9	Jre-miR156j	UGCAUAUUUCUUCU	AGAAGAGAGUGAGCA	141	154	5	19	-9.85
Jr01_22930_p1	JrWRKY9	Jre-miR156k	UGCAUAUUUCUUCU	AGAAGAGAGUGAGCA	141	154	5	19	-9.85
Jr01_22930_p1	JrWRKY9	Jre-miR156l	UGCAUAUUUCUUCU	AGAAGAGAGUGAGCA	141	154	5	19	-9.85
Jr01_22930_p1	JrWRKY9	Jre-miR159a	UGCAUAUUUCUUC	GAAGGGAGCUGUA	141	153	9	21	-8.03
Jr01_22930_p1	JrWRKY9	Jre-miR159b	UUUCUUC	GAAGGGA	147	153	8	14	-2.48
Jr01_22930_p1	JrWRKY9	Jre-miR159c	UUUCUUC	GAAGGGA	147	153	8	14	-2.48
Jr01_22930_p1	JrWRKY9	Jre-miR159d	GCAUAUUUCUUC	GAAGGGAGC	142	153	9	17	-3.24
Jr01_22930_p1	JrWRKY9	Jre-miR159e	GCAUAUUUCUUC	GAAGGGAGC	142	153	9	17	-4.86
Jr01_22930_p1	JrWRKY9	Jre-miR159f	UUCUUCUUACUUC	GGAGUGAAGGGAG	148	160	4	16	-5.7
Jr01_22930_p1	JrWRKY9	Jre-miR159g	UUUCUUC	GAAGGGA	147	153	8	14	-2.48
Jr01_22930_p1	JrWRKY9	Jre-miR159h	UUUCUUC	GAAGGGA	147	153	8	14	-2.48
Jr01_22930_p1	JrWRKY9	Jre-miR159i	UUUCUUC	GAAGGGA	147	153	8	14	-2.48
Jr01_22930_p1	JrWRKY9	Jre-miR159j	UUUCUUC	GAAGGGA	147	153	8	14	-2.48
Jr01_22930_p1	JrWRKY9	Jre-miR159k	GCAUAUUUCUUC	GAAGGGAGC	142	153	9	17	-4.86
Jr01_22930_p1	JrWRKY9	Jre-miR164a	CAAAUGCAUAUUUCUUC	GGAGAAGCAGGGCACGUG	137	153	2	19	-4.94
Jr01_22930_p1	JrWRKY9	Jre-miR164b	CAAAUGCAUAUUUCUUC	GGAGAAGCAGGGCACGUG	137	153	2	19	-4.94
Jr01_22930_p1	JrWRKY9	Jre-miR164c	CAAAUGCAUAUUUCUUC	GGAGAAGCAGGGCACGUG	137	153	2	19	-4.94
Jr01_22930_p1	JrWRKY9	Jre-miR164d	CAAAUGCAUAUUUCUUC	GGAGAAGCAGGGCACGUG	137	153	2	19	-4.94
Jr01_22930_p1	JrWRKY9	Jre-miR164e	CAAAUGCAUAUUUCUUC	GGAGAAGCAGGGCACGUG	137	153	2	19	-4.94
Jr01_22930_p1	JrWRKY9	Jre-miR165a	GAUGAGGC	GCUUCAUU	46	53	10	17	-5.9
Jr01_22930_p1	JrWRKY9	Jre-miR165b	GAUGAGGC	GCUUCAUU	46	53	10	17	-5.9
Jr01_22930_p1	JrWRKY9	Jre-miR165c	GAUGAGGC	GCUUCAUU	46	53	10	17	-5.9
Jr01_22930_p1	JrWRKY9	Jre-miR165d	GAUGAGGC	GCUUCAUU	46	53	10	17	-5.9
Jr01_22930_p1	JrWRKY9	Jre-miR165e	GAUGAGGC	GCUUCAUU	46	53	10	17	-5.9
Jr01_22930_p1	JrWRKY9	Jre-miR165f	GAUGAGGC	GCUUCAUU	46	53	10	17	-5.9
Jr01_22930_p1	JrWRKY9	Jre-miR165g	GAUGAGGC	GCUUCAUU	46	53	10	17	-5.9
Jr01_22930_p1	JrWRKY9	Jre-miR165h	GAUGAGGC	GCUUCAUU	46	53	10	17	-5.9
Jr01_22930_p1	JrWRKY9	Jre-miR165i	GAUGAGGC	GCUUCAUU	46	53	10	17	-5.9
Jr01_22930_p1	JrWRKY9	Jre-miR165j	GAUGAGGC	GCUUCAUU	46	53	10	17	-5.9
Jr01_22930_p1	JrWRKY9	Jre-miR165k	GAUGAGGC	GCUUCAUU	46	53	10	17	-5.9
Jr01_22930_p1	JrWRKY9	Jre-miR165l	GAUGAGGC	GCUUCAUU	46	53	10	17	-5.9
Jr01_22930_p1	JrWRKY9	Jre-miR165m	GAUGAGGC	GCUUCAUU	46	53	10	17	-5.89
Jr01_22930_p1	JrWRKY9	Jre-miR166a	GAUGAGGC	GCUUCAUU	46	53	12	19	-6.21
Jr01_22930_p1	JrWRKY9	Jre-miR167d	UAGGAUCAGAAGGUA	UGCCAGCAUGAUCUUA	16	30	7	22	-7.27
Jr01_22930_p1	JrWRKY9	Jre-miR167f	UAGGAUCAGAAGGUA	UGCCAGCAUGAUCUUA	16	30	7	22	-7.27
Jr01_22930_p1	JrWRKY9	Jre-miR168a	UUGUAUCA	UGGUGCAG	31	38	6	13	-2.21
Jr01_22930_p1	JrWRKY9	Jre-miR170a	GUAGGAUCAG	CUGGUUCAC	15	24	8	16	-3.64
Jr01_22930_p1	JrWRKY9	Jre-miR170b	GUAGGAUCAG	CUGGUUCAC	15	24	8	16	-3.64
Jr01_22930_p1	JrWRKY9	Jre-miR170c	UGGUUCA	UGAGCCG	116	122	2	8	-3.59
Jr01_22930_p1	JrWRKY9	Jre-miR170d	GAUUGGUUCA	UGAGCCGCGUC	113	122	2	12	-4.59
Jr01_22930_p1	JrWRKY9	Jre-miR170e	UGGUUCA	UGAGCCG	116	122	2	8	-3.59
Jr01_22930_p1	JrWRKY9	Jre-miR170f	GAUUGGUUCA	UGAGCCGCGUC	113	122	2	12	-4.61
Jr01_22930_p1	JrWRKY9	Jre-miR170g	AUUGGUUCACAUCGGUCG	UGAUUGAGCCGUGCCAAU	114	131	1	18	-4.71
Jr01_22930_p1	JrWRKY9	Jre-miR170h	AUUGGUUCACAUCGGUCG	UGAUUGAGCCGUGCCAAU	114	131	1	18	-4.71
Jr01_22930_p1	JrWRKY9	Jre-miR170i	AUUGGUUCACAUCGGUCG	UGAUUGAGCCGUGCCAAU	114	131	1	18	-4.71
Jr01_22930_p1	JrWRKY9	Jre-miR170j	AUUGGUUCACAUCGGUCG	UGAUUGAGCCGUGCCAAU	114	131	1	18	-4.71
Jr01_22930_p1	JrWRKY9	Jre-miR170k	AUUGGUUCACAUCGGUCG	UGAUUGAGCCGUGCCAAU	114	131	1	18	-4.71
Jr01_22930_p1	JrWRKY9	Jre-miR170l	AUUGGUUCACAUCGGUCG	UGAUUGAGCCGUGCCAAU	114	131	1	18	-4.71
Jr01_22930_p1	JrWRKY9	Jre-miR170m	AUUGGUUCACAUCGGUCG	UGAUUGAGCCGUGCCAAU	114	131	1	18	-4.71
Jr01_22930_p1	JrWRKY9	Jre-miR170n	AUUGGUUC	GAACCAAU	114	121	7	14	-6.42
Jr01_22930_p1	JrWRKY9	Jre-miR170o	GAUUGGUUCACAUCG	UGAUUGAGCCAUGC	113	127	1	14	-5
Jr01_22930_p1	JrWRKY9	Jre-miR172a	CAUCGGUCGAGAAUC	GAAUCUUGAUGAUG	123	137	2	15	-5.54
Jr01_22930_p1	JrWRKY9	Jre-miR172b	CAUCGGUCGAGAAUC	GAAUCUUGAUGAUG	123	137	2	15	-5.37
Jr01_22930_p1	JrWRKY9	Jre-miR172c	CAUCGGUCGAGAAUC	GAAUCUUGAUGAUG	123	137	2	15	-5.54
Jr01_22930_p1	JrWRKY9	Jre-miR172d	CAUCGGUCGAGAAUC	GAAUCUUGAUGAUG	123	137	2	15	-5.54
Jr01_22930_p1	JrWRKY9	Jre-miR172e	CAUCGGUCGAGAAUC	GAAUCUUGAUGAUG	123	137	2	15	-5.37
Jr01_22930_p1	JrWRKY9	Jre-miR172f	CAUCGGUCGAGAAUC	GAAUCUUGAUGAUG	123	137	2	15	-5.54
Jr01_22930_p1	JrWRKY9	Jre-miR390a	UGCAUAUUUCUUCU	AGGAGGGAUAGCG	141	154	7	19	-9.33
Jr01_22930_p1	JrWRKY9	Jre-miR390b	UGCAUAUUUCUUCU	AGGAGGGAUAGCG	141	154	7	19	-9.33
Jr01_22930_p1	JrWRKY9	Jre-miR390c	UGCAUAUUUCUUCU	AGGAGGGAUAGCA	141	154	7	19	-10.09
Jr01_22930_p1	JrWRKY9	Jre-miR393a	AUCAAAUGCAUAUUUCUU	AAGGGAUCGCAUUGAU	135	152	5	20	-5.88
Jr01_22930_p1	JrWRKY9	Jre-miR393b	AUCAAAUGCAUAUUUCUU	AAGGGAUCGCAUUGAU	135	152	5	20	-5.88
Jr01_22930_p1	JrWRKY9	Jre-miR393c	GGAUCAG	UUGAUCU	18	24	16	22	-0.69
Jr01_22930_p1	JrWRKY9	Jre-miR395a	UUCUUCUUACUUC	GAAGUGUUUGGGGGAA	148	160	3	18	-8.6
Jr01_22930_p1	JrWRKY9	Jre-miR395b	UUCUUCUUACUUC	GAAGUGUUUGGGGGAA	148	160	3	18	-8.6
Jr01_22930_p1	JrWRKY9	Jre-miR395c	UUCUUCUUACUUC	GAAGUGUUUGGGGGAA	148	160	3	18	-8.6
Jr01_22930_p1	JrWRKY9	Jre-miR395d	UUCUUCUUACUUC	GAAGUGUUUGGGGGAA	148	160	3	18	-8.6
Jr01_22930_p1	JrWRKY9	Jre-miR395e	UUCUUCUUACUUC	GAAGUGUUUGGGGGAA	148	160	3	18	-8.6
Jr01_22930_p1	JrWRKY9	Jre-miR395f	UUCUUCUUACUUC	GAAGUGUUUGGGGGAA	148	160	3	18	-8.6
Jr01_22930_p1	JrWRKY9	Jre-miR395g	UUCUUCUUACUUC	GAAGUGUUUGGGGGAA	148	160	3	18	-8.6
Jr01_22930_p1	JrWRKY9	Jre-miR395h	UUCUUCUUACUUC	GAAGUGUUUGGGGGAA	148	160	3	18	-8.6
Jr01_22930_p1	JrWRKY9	Jre-miR395i	UUCUUCUUACUUC	GAAGUGUUUGGGGGAA	148	160	3	18	-8.6
Jr01_22930_p1	JrWRKY9	Jre-miR395j	UUCUUCUUACUUC	GAAGUGUUUGGGGGAA	148	160	3	18	-8.6
Jr01_22930_p1	JrWRKY9	Jre-miR396a	AGGAUCAGAAGGU	GCUUUCUUGAACUU	17	29	8	21	-4.85
Jr01_22930_p1	JrWRKY9	Jre-miR396b	GGAUCAGAAGGU	GCUUUCUUGAACU	18	29	8	20	-3.89
Jr01_22930_p1	JrWRKY9	Jre-miR396c	GGAUCAGAAGGU	GCUUUCUUGAACU	18	29	8	20	-3.89
Jr01_22930_p1	JrWRKY9	Jre-miR396d	GGAUCAGAAGGU	GCUUUCUUGAACU	18	29	8	20	-3.89
Jr01_22930_p1	JrWRKY9	Jre-miR396e	AGGAUCAGAAGGU	GCUUUCUUGAACUU	17	29	8	21	-4.82
Jr01_22930_p1	JrWRKY9	Jre-miR396f	AGGAUCAGAAGGU	GCUUUCUUGAACUU	17	29	8	21	-4.82
Jr01_22930_p1	JrWRKY9	Jre-miR397a	GUACUUGAU	AUUGAGUGC	78	86	3	11	-3.11
Jr01_22930_p1	JrWRKY9	Jre-miR399a	GCAUAUUUCUUCUU	AAGGAGAAUUGC	142	155	6	17	-7.01
Jr01_22930_p1	JrWRKY9	Jre-miR399b	GCAUAUUUCUUCUU	AAGGAGAAUUGC	142	155	6	17	-7.01
Jr01_22930_p1	JrWRKY9	Jre-miR399c	GCAUAUUUCUUCUU	AAGGAGAGUUGC	142	155	6	17	-6.41
Jr01_22930_p1	JrWRKY9	Jre-miR399d	GCAUAUUUCUUCUU	AAGGAGAGUUGC	142	155	6	17	-6.41
Jr01_22930_p1	JrWRKY9	Jre-miR399e	GCAUAUUUCUUCUU	AAGGAGAGUUGC	142	155	6	17	-6.71
Jr01_22930_p1	JrWRKY9	Jre-miR399f	GCAUAUUUCUUCUU	AAGGAGAGUUGC	142	155	6	17	-6.71
Jr01_22930_p1	JrWRKY9	Jre-miR482d	GAUUGGU	GCCAAUU	113	119	3	9	-3.11
Jr01_22930_p1	JrWRKY9	Jre-miR530a	CAAAUGCA	UGCAUUUG	137	144	1	8	-5.84
Jr01_22930_p1	JrWRKY9	Jre-miR530b	CAAAUGCA	UGCAUUUG	137	144	1	8	-5.84
Jr01_22930_p1	JrWRKY9	Jre-miR530c	CAAAUGCA	UGCAUUUG	137	144	1	8	-5.84
Jr01_22930_p1	JrWRKY9	Jre-miR530d	CAAAUGCA	UGCAUUUG	137	144	1	8	-5.84
Jr01_22930_p1	JrWRKY9	Jre-miR5675a	CGUAGGAUC	GAUUCUGAG	14	22	8	16	-4.63
Jr01_22930_p1	JrWRKY9	Jre-miR7972a	GAGAAUCAAAUGC	GGGUUGUGAUUCUC	131	143	7	20	-7.21
Jr01_22930_p1	JrWRKY9	Jre-miRN745a	AAUUGUAGUUACGUAG	UUGGGUCGUUGCGAUU	3	18	1	16	-3.21
Jr01_22930_p1	JrWRKY9	Jre-miRN745b	AAUUGUAGUUACGUAG	UUGGGUCGUUGCGAUU	3	18	1	16	-3.21
Jr01_22930_p1	JrWRKY9	Jre-miRN745c	AAUUGUAGUUACGUAG	UUGGGUCGUUGCGAUU	3	18	1	16	-3.21
Jr01_22930_p1	JrWRKY9	Jre-miRN5866	AAUGUAUGAUCGUAUG	UAUACGAUUACAUU	87	102	8	21	-4.86
Jr01_22930_p1	JrWRKY9	Jre-miRN5867	GAUGAGG	CCUCGUU	46	52	8	14	-4.28
Jr01_22930_p1	JrWRKY9	Jre-miRN5868	AGGUAUU	AAUACUU	26	32	10	16	-1.18
Jr01_22930_p1	JrWRKY9	Jre-miRN5872	CCUCUCAAAGAUUGGUUCA	UGAACCGGAGG	104	122	11	21	-5.8
Jr01_22930_p1	JrWRKY9	Jre-miRN5874	CUCUCAAAG	UUUUGAGGG	105	113	10	18	-5.94
Jr01_22930_p1	JrWRKY9	Jre-miRN5875	GGCACAU	AUGUGCU	51	57	2	8	-5.4
Jr01_22930_p1	JrWRKY9	Jre-miRN5877	CUUCUUACUUCUU	GGGAAAACUGAGGAG	150	162	4	18	-6.28
Jr01_22930_p1	JrWRKY9	Jre-miRN5878	UUGGUUCACAUCGG	UUGAUGUGAACCAA	115	128	3	16	-14.43
Jr01_22930_p1	JrWRKY9	Jre-miRN5880	GAGGCAC	GUGUUUC	49	55	5	11	-4.69
Jr01_22930_p1	JrWRKY9	Jre-miRN5882	GUAGGAUCAGAAGGUA	UACUUUCCUUCAAC	15	30	1	14	-3.8
Jr01_22930_p1	JrWRKY9	Jre-miRN5885	GAUGAGGCACAU	AUGUGCCCGUC	46	57	2	12	-11.23
Jr01_22930_p1	JrWRKY9	Jre-miRN5886	UGUAGUU	AAUUACA	6	12	5	11	-3.04
Jr01_22930_p1	JrWRKY9	Jre-miRN5887	GGUCGAGAAUCAAAUGCA	UGUAUGAUUUUUAUGCC	127	144	5	21	-3.01
Jr01_22930_p1	JrWRKY9	Jre-miRN5888	GUAUUGU	ACGAUGU	28	34	8	14	-0.01
Jr01_22930_p1	JrWRKY9	Jre-miRN5891	GAUGAUGAGGCA	UGCCAUGCAUCGUC	43	54	5	18	-4.85
Jr01_22930_p1	JrWRKY9	Jre-miRN5892	GGCACAU	AUGUGCU	51	57	2	8	-6.15
Jr01_22930_p1	JrWRKY9	Jre-miRN5894	AUGCCCUCUC	GAGAGGGCAU	100	109	11	20	-14.71
Jr01_22930_p1	JrWRKY9	Jre-miRN5895	GCAUAUUUCUUC	GGAGAAGCAGGGGC	142	153	8	21	-2.36
Jr01_22930_p1	JrWRKY9	Jre-miRN5896	GCAUAUUUCUUC	GGAGAAGCAGGGGC	142	153	8	21	-2.36
Jr01_22930_p1	JrWRKY9	Jre-miRN5897	GCAUAUUUCUUC	GGAGAAGCAGGGGC	142	153	8	21	-2.36
Jr01_22930_p1	JrWRKY9	Jre-miRN5898	GCAUAUUUCUUC	GGAGAAGCAGGGGC	142	153	8	21	-2.36
Jr01_22930_p1	JrWRKY9	Jre-miRN5899	UCUUCUUACUUCU	GGGAUGAGAAGA	149	161	6	17	-8.61
Jr01_22930_p1	JrWRKY9	Jre-miRN5901	UCGGUCGAG	CUCGGCUGA	125	133	11	19	-7.42
Jr01_22930_p1	JrWRKY9	Jre-miRN5904	GGAUCAGAAGGUAUUG	UAAUAUCGUGUGGCC	18	33	6	20	-4.23
Jr01_22930_p1	JrWRKY9	Jre-miRN5905	GCAUAUUUCUUCUUACUUC	GAGGCCUUGGGGGAGAGUGC	142	160	2	21	-9.93
Jr01_22930_p1	JrWRKY9	Jre-miRN5906	GGUCGAG	CUUGGCU	127	133	11	17	-1
Jr01_22930_p1	JrWRKY9	Jre-miRN5907	GGUCGAG	CUUGACC	127	133	5	11	-3.96
Jr01_22930_p1	JrWRKY9	Jre-miRN5908	UAGUUACGUAGGAUCAGAAGG	UCUCAUGAUCUUUUAACUG	8	28	1	19	-7.74
Jr01_22930_p1	JrWRKY9	Jre-miRN5909	GGAUCAGA	UCUGAUCC	18	25	11	18	-9.7
Jr01_22930_p1	JrWRKY9	Jre-miRN5910	AUUGUAGUUACGUA	UAUGUUGGGCUAUAGU	4	17	2	17	-6.5
Jr01_22930_p1	JrWRKY9	Jre-miRN5911	AGUUACGUAGGA	UCCUGCGUACU	9	20	5	15	-9.47
Jr02_04990_p1	JrWRKY11	Jre-miR156a	GUGGUCUCGACUUUUCUGU	ACAGAAGAGAGUGAGCAC	48	66	3	20	-7.29
Jr02_04990_p1	JrWRKY11	Jre-miR156b	GUGGUCUCGACUUUUCUGU	ACAGAAGAUAGAGAGCAC	48	66	4	21	-8.85
Jr02_04990_p1	JrWRKY11	Jre-miR156c	GUGGUCUCGACUUUUCUGU	ACAGAAGAUAGAGAGCAC	48	66	4	21	-8.85
Jr02_04990_p1	JrWRKY11	Jre-miR156d	GUGGUCUCGACUUUUCUGU	ACAGAAGAUAGAGAGCAC	48	66	4	21	-8.85
Jr02_04990_p1	JrWRKY11	Jre-miR156e	GUGGUCUCGACUUUUCUGU	ACAGAAGAUAGAGAGCAC	48	66	4	21	-8.85
Jr02_04990_p1	JrWRKY11	Jre-miR156f	GUGGUCUCGACUUUUCUGU	ACAGAAGACAGAGAGCAC	48	66	4	21	-8.73
Jr02_04990_p1	JrWRKY11	Jre-miR156g	GUGGUCUCGACUUUUCUGU	ACAGAAGAGAGAGAGCAC	48	66	4	21	-11.93
Jr02_04990_p1	JrWRKY11	Jre-miR156h	GUGGUCUCGACUUUUCUGU	ACAGAAGAGAGUGAGCAC	48	66	3	20	-7.29
Jr02_04990_p1	JrWRKY11	Jre-miR156i	GUGGUCUCGACUUUUCUGU	ACAGAAGAGAGUGAGCAC	48	66	3	20	-7.29
Jr02_04990_p1	JrWRKY11	Jre-miR156j	GUGGUCUCGACUUUUCUGU	ACAGAAGAGAGUGAGCAC	48	66	3	20	-7.29
Jr02_04990_p1	JrWRKY11	Jre-miR156k	GUGGUCUCGACUUUUCUGU	ACAGAAGAGAGUGAGCAC	48	66	3	20	-7.29
Jr02_04990_p1	JrWRKY11	Jre-miR156l	GUGGUCUCGACUUUUCUGU	ACAGAAGAGAGUGAGCAC	48	66	3	20	-7.29
Jr02_04990_p1	JrWRKY11	Jre-miR159a	UUUCCUU	AAGGGAG	136	142	10	16	-5.2
Jr02_04990_p1	JrWRKY11	Jre-miR159b	UUUCCUU	AAGGGAG	136	142	9	15	-2.62
Jr02_04990_p1	JrWRKY11	Jre-miR159c	UUUCCUU	AAGGGAG	136	142	9	15	-2.62
Jr02_04990_p1	JrWRKY11	Jre-miR159d	UUUCCUU	AAGGGAG	136	142	10	16	-3.3
Jr02_04990_p1	JrWRKY11	Jre-miR159e	AGAUUUUUUCCUU	AAGGGAGCUCU	130	142	10	20	-5.49
Jr02_04990_p1	JrWRKY11	Jre-miR159f	AUUCCAA	UUGGAGU	28	34	2	8	-2.66
Jr02_04990_p1	JrWRKY11	Jre-miR159g	UUUCCUU	AAGGGAG	136	142	9	15	-2.62
Jr02_04990_p1	JrWRKY11	Jre-miR159h	UUUCCUU	AAGGGAG	136	142	9	15	-2.62
Jr02_04990_p1	JrWRKY11	Jre-miR159i	UUUCCUU	AAGGGAG	136	142	9	15	-2.62
Jr02_04990_p1	JrWRKY11	Jre-miR159j	UUUCCUU	AAGGGAG	136	142	9	15	-2.62
Jr02_04990_p1	JrWRKY11	Jre-miR159k	AGAUUUUUUCCUU	AAGGGAGCUCU	130	142	10	20	-5.49
Jr02_04990_p1	JrWRKY11	Jre-miR164a	UUUUUCC	GGAGAAG	134	140	2	8	-3.11
Jr02_04990_p1	JrWRKY11	Jre-miR164b	UUUUUCC	GGAGAAG	134	140	2	8	-3.11
Jr02_04990_p1	JrWRKY11	Jre-miR164c	UUUUUCC	GGAGAAG	134	140	2	8	-3.11
Jr02_04990_p1	JrWRKY11	Jre-miR164d	UUUUUCC	GGAGAAG	134	140	2	8	-3.11
Jr02_04990_p1	JrWRKY11	Jre-miR164e	UUUUUCC	GGAGAAG	134	140	2	8	-3.11
Jr02_04990_p1	JrWRKY11	Jre-miR167d	UAAGAUU	GAUCUUA	128	134	16	22	-3.6
Jr02_04990_p1	JrWRKY11	Jre-miR167f	UAAGAUU	GAUCUUA	128	134	16	22	-3.6
Jr02_04990_p1	JrWRKY11	Jre-miR168a	AUUUGUACU	GGUGCAGGU	83	91	7	15	-5.13
Jr02_04990_p1	JrWRKY11	Jre-miR169h	UAUUUUUG	CAAGGAUG	145	152	5	12	-2.71
Jr02_04990_p1	JrWRKY11	Jre-miR170c	GGUGAUA	UAUCACU	102	108	15	21	-2.94
Jr02_04990_p1	JrWRKY11	Jre-miR170e	GGUGAUA	UAUCACU	102	108	15	21	-2.94
Jr02_04990_p1	JrWRKY11	Jre-miR170n	GGUGAUA	UAUCACU	102	108	14	20	-3.12
Jr02_04990_p1	JrWRKY11	Jre-miR172a	AGACAUGAUCAAGA	UCUUGAUGAUGCU	68	81	5	17	-7.93
Jr02_04990_p1	JrWRKY11	Jre-miR172b	AGACAUGAUCAAGA	UCUUGAUGAUGCU	68	81	5	17	-7.88
Jr02_04990_p1	JrWRKY11	Jre-miR172c	AGACAUGAUCAAGA	UCUUGAUGAUGCU	68	81	5	17	-7.93
Jr02_04990_p1	JrWRKY11	Jre-miR172d	AGACAUGAUCAAGA	UCUUGAUGAUGCU	68	81	5	17	-7.93
Jr02_04990_p1	JrWRKY11	Jre-miR172e	AGACAUGAUCAAGA	UCUUGAUGAUGCU	68	81	5	17	-7.88
Jr02_04990_p1	JrWRKY11	Jre-miR172f	AGACAUGAUCAAGA	UCUUGAUGAUGCU	68	81	5	17	-7.93
Jr02_04990_p1	JrWRKY11	Jre-miR2111a	UAAACUUGA	UGAGGUUUA	9	17	13	21	-0.77
Jr02_04990_p1	JrWRKY11	Jre-miR2111b	UAAACUUGA	UGAGGUUUA	9	17	13	21	-0.77
Jr02_04990_p1	JrWRKY11	Jre-miR390a	UUUUUCCU	AGGAGGGA	134	141	7	14	-5.15
Jr02_04990_p1	JrWRKY11	Jre-miR390b	UUUUUCCU	AGGAGGGA	134	141	7	14	-5.15
Jr02_04990_p1	JrWRKY11	Jre-miR390c	UUUUUCCU	AGGAGGGA	134	141	7	14	-5.26
Jr02_04990_p1	JrWRKY11	Jre-miR393a	UGUGGUCUC	GGGAUCGCA	47	55	7	15	-4.14
Jr02_04990_p1	JrWRKY11	Jre-miR393b	UGUGGUCUC	GGGAUCGCA	47	55	7	15	-4.14
Jr02_04990_p1	JrWRKY11	Jre-miR393c	UGUGGUCUC	GGGAUCGCA	47	55	7	15	-2.52
Jr02_04990_p1	JrWRKY11	Jre-miR395a	UUUUCCUUAAUAUUUU	GAAGUGUUUGGGGGAA	135	150	3	18	-8.51
Jr02_04990_p1	JrWRKY11	Jre-miR395b	UUUUCCUUAAUAUUUU	GAAGUGUUUGGGGGAA	135	150	3	18	-8.51
Jr02_04990_p1	JrWRKY11	Jre-miR395c	UUUUCCUUAAUAUUUU	GAAGUGUUUGGGGGAA	135	150	3	18	-8.51
Jr02_04990_p1	JrWRKY11	Jre-miR395d	UUUUCCUUAAUAUUUU	GAAGUGUUUGGGGGAA	135	150	3	18	-8.51
Jr02_04990_p1	JrWRKY11	Jre-miR395e	UUUUCCUUAAUAUUUU	GAAGUGUUUGGGGGAA	135	150	3	18	-8.51
Jr02_04990_p1	JrWRKY11	Jre-miR395f	UUUUCCUUAAUAUUUU	GAAGUGUUUGGGGGAA	135	150	3	18	-8.51
Jr02_04990_p1	JrWRKY11	Jre-miR395g	UUUUCCUUAAUAUUUU	GAAGUGUUUGGGGGAA	135	150	3	18	-8.51
Jr02_04990_p1	JrWRKY11	Jre-miR395h	UUUUCCUUAAUAUUUU	GAAGUGUUUGGGGGAA	135	150	3	18	-8.51
Jr02_04990_p1	JrWRKY11	Jre-miR395i	UUUUCCUUAAUAUUUU	GAAGUGUUUGGGGGAA	135	150	3	18	-8.51
Jr02_04990_p1	JrWRKY11	Jre-miR395j	UUUUCCUUAAUAUUUU	GAAGUGUUUGGGGGAA	135	150	3	18	-8.51
Jr02_04990_p1	JrWRKY11	Jre-miR396a	UCAAGAAAUUUGU	ACAGCUUUCUUGA	76	88	5	17	-6.41
Jr02_04990_p1	JrWRKY11	Jre-miR396b	UCAAGAAAUUUGU	ACAGCUUUCUUGA	76	88	5	17	-5.77
Jr02_04990_p1	JrWRKY11	Jre-miR396c	UCAAGAAAUUUGU	ACAGCUUUCUUGA	76	88	5	17	-5.77
Jr02_04990_p1	JrWRKY11	Jre-miR396d	UCAAGAAAUUUGU	ACAGCUUUCUUGA	76	88	5	17	-5.77
Jr02_04990_p1	JrWRKY11	Jre-miR396e	UCAAGAAAUUUGU	ACAGCUUUCUUGA	76	88	5	17	-6.38
Jr02_04990_p1	JrWRKY11	Jre-miR396f	UCAAGAAAUUUGU	ACAGCUUUCUUGA	76	88	5	17	-6.38
Jr02_04990_p1	JrWRKY11	Jre-miR397a	UUGUACUGCUUGA	UCAUUGAGUGCAG	85	97	1	13	-5.37
Jr02_04990_p1	JrWRKY11	Jre-miR398a	GUGGUCU	AGGUCAC	48	54	10	16	-0.26
Jr02_04990_p1	JrWRKY11	Jre-miR398b	GUGGUCU	AGGUCAC	48	54	10	16	-0.26
Jr02_04990_p1	JrWRKY11	Jre-miR399a	UUUUCCUU	AAGGAGAA	135	142	6	13	-5.04
Jr02_04990_p1	JrWRKY11	Jre-miR399b	UUUUCCUU	AAGGAGAA	135	142	6	13	-5.04
Jr02_04990_p1	JrWRKY11	Jre-miR399c	UUUUCCUU	AAGGAGAG	135	142	6	13	-4.29
Jr02_04990_p1	JrWRKY11	Jre-miR399d	UUUUCCUU	AAGGAGAG	135	142	6	13	-4.29
Jr02_04990_p1	JrWRKY11	Jre-miR399e	UUUUCCUU	AAGGAGAG	135	142	6	13	-4.57
Jr02_04990_p1	JrWRKY11	Jre-miR399f	UUUUCCUU	AAGGAGAG	135	142	6	13	-4.57
Jr02_04990_p1	JrWRKY11	Jre-miR477a	AAUGUUGUUUAUUUUGUGG	CCUCAAAGGCUUCCAGCAUU	33	51	3	22	-3.01
Jr02_04990_p1	JrWRKY11	Jre-miR477b	AAUGUUGUUUAUUUUGUGG	CCUCAAAGGCUUCCAGCAUU	33	51	3	22	-3.01
Jr02_04990_p1	JrWRKY11	Jre-miR477c	AAUGUUGUUUAUUUUGUGG	CCUCAAAGGCUUCCAGCAUU	33	51	3	22	-3.01
Jr02_04990_p1	JrWRKY11	Jre-miR477d	AAUGUUGUUUAUUUUGUGG	CCUCAAAGGCUUCCAGCAUU	33	51	3	22	-3.01
Jr02_04990_p1	JrWRKY11	Jre-miR482c	GUGGUCU	AGACCAC	48	54	7	13	-7.85
Jr02_04990_p1	JrWRKY11	Jre-miR5675a	UUCCUUAAUAUUUUUGUU	AGCAAUGGAUUCUGAGGGA	137	154	1	19	-8.85
Jr02_04990_p1	JrWRKY11	Jre-miR7972a	AUAAUUC	GGGUUGU	25	31	7	13	-1.69
Jr02_04990_p1	JrWRKY11	Jre-miRN745a	UGUGGUC	GAUUACG	47	53	13	19	-1.38
Jr02_04990_p1	JrWRKY11	Jre-miRN745b	UGUGGUC	GAUUACG	47	53	13	19	-1.38
Jr02_04990_p1	JrWRKY11	Jre-miRN745c	UGUGGUC	GAUUACG	47	53	13	19	-1.38
Jr02_04990_p1	JrWRKY11	Jre-miRN5866	UGUGGUC	GAUUACA	47	53	13	19	-4.31
Jr02_04990_p1	JrWRKY11	Jre-miRN5867	GAUUUUU	AGAGAUC	131	137	2	8	-2.09
Jr02_04990_p1	JrWRKY11	Jre-miRN5872	UCCAAUGUUGUUUAUUUUGUGG	UUGCAAGACUGAACCGGAGGA	30	51	2	22	-1.54
Jr02_04990_p1	JrWRKY11	Jre-miRN5873	GCUUGAAGAUGGUGAUAGCAAG	CUUGUACCAACUGUCUCUGGC	92	113	1	21	-6.26
Jr02_04990_p1	JrWRKY11	Jre-miRN5874	UUCCUUAAUAUUUUUGUUU	GAACGUUUUGAGGGA	137	155	5	19	-6.03
Jr02_04990_p1	JrWRKY11	Jre-miRN5875	GAUAGCAAGA	UCUUGCUCUC	105	114	8	17	-5.29
Jr02_04990_p1	JrWRKY11	Jre-miRN5876	GGUGAUAGCAAGAUAGAGA	UCUCUAUCUGUCACC	102	120	8	22	-7.55
Jr02_04990_p1	JrWRKY11	Jre-miRN5877	UUCCUUAAUAUUUUUGUUUU	GAAGGGAAAACUGAGGAG	137	156	1	18	-8.47
Jr02_04990_p1	JrWRKY11	Jre-miRN5878	UGACGUUAA	UUGAUGUGA	3	11	3	11	-3.04
Jr02_04990_p1	JrWRKY11	Jre-miRN5880	UUUGUACUGCUUGAAGAUGGU	ACCGUGUUUCUCUGUAUAAG	84	104	2	21	-4.12
Jr02_04990_p1	JrWRKY11	Jre-miRN5882	AGAGAAGUUGAA	UUCAACACUUCUCU	116	127	9	22	-3.2
Jr02_04990_p1	JrWRKY11	Jre-miRN5883	GUGGUCUC	GGGACUGC	48	55	4	11	-1.24
Jr02_04990_p1	JrWRKY11	Jre-miRN5884	GUACUGCUU	GAGCGGUUAC	87	95	3	12	-3.78
Jr02_04990_p1	JrWRKY11	Jre-miRN5885	GAUGGUGAUAGC	GUCUUCACCAUC	99	110	10	21	-8.8
Jr02_04990_p1	JrWRKY11	Jre-miRN5886	ACUGCUUGAAGAUGGUGAUAGC	GCAAUUACACCUUGGGCAGU	89	110	3	22	-6.73
Jr02_04990_p1	JrWRKY11	Jre-miRN5889	UAUUUUU	AAGAAUA	145	151	14	20	-2.52
Jr02_04990_p1	JrWRKY11	Jre-miRN5890	AUUUUUUCCUUA	UGAGGAUGAAUAGAAAAU	132	143	3	20	-3.66
Jr02_04990_p1	JrWRKY11	Jre-miRN5891	AGAUGGUGAUAGCA	UGCCAUGCAUCGUCU	98	111	5	19	-5.35
Jr02_04990_p1	JrWRKY11	Jre-miRN5893	AGAGAAG	CUUCUCU	116	122	4	10	-1.06
Jr02_04990_p1	JrWRKY11	Jre-miRN5894	GAUUUUUUCCUUAAU	AUUAUAGAGAGGGC	131	145	5	18	-3.77
Jr02_04990_p1	JrWRKY11	Jre-miRN5895	UUUUUCC	GGAGAAG	134	140	8	14	-2.11
Jr02_04990_p1	JrWRKY11	Jre-miRN5896	UUUUUCC	GGAGAAG	134	140	8	14	-2.11
Jr02_04990_p1	JrWRKY11	Jre-miRN5897	UUUUUCC	GGAGAAG	134	140	8	14	-2.11
Jr02_04990_p1	JrWRKY11	Jre-miRN5898	UUUUUCC	GGAGAAG	134	140	8	14	-2.11
Jr02_04990_p1	JrWRKY11	Jre-miRN5899	AAGAUUUUUUCCUUA	UGGGAUGAGAAGACUU	129	143	5	20	-3.28
Jr02_04990_p1	JrWRKY11	Jre-miRN5900	GAAGAUGGUG	UGCCAUCGUUC	96	105	1	11	-4.36
Jr02_04990_p1	JrWRKY11	Jre-miRN5904	ACAUGAU	AUCGUGU	70	76	10	16	-3.37
Jr02_04990_p1	JrWRKY11	Jre-miRN5905	UUUUUCCUUAA	UUGGGGGAGAG	134	144	8	18	-6.15
Jr02_04990_p1	JrWRKY11	Jre-miRN5906	GAUAGCA	UGUUAUC	105	111	4	10	-4.09
Jr02_04990_p1	JrWRKY11	Jre-miRN5910	UGUGGUCU	GGGCUAUA	47	54	8	15	-3.1
Jr02_04990_p1	JrWRKY11	Jre-miRN5912	UUUUUGUU	GGCAGAAA	147	154	12	19	-3.58
Jr02_17180_p1	JrWRKY13	Jre-miR156a	GUUCAACCCAACUUUCUU	AAGAGAGUGAGC	201	218	7	18	-6.81
Jr02_17180_p1	JrWRKY13	Jre-miR156b	GCACGUCUUUGUC	GAUAGAGAGC	244	256	10	19	-5.83
Jr02_17180_p1	JrWRKY13	Jre-miR156c	GCACGUCUUUGUC	GAUAGAGAGC	244	256	10	19	-5.83
Jr02_17180_p1	JrWRKY13	Jre-miR156d	GCACGUCUUUGUC	GAUAGAGAGC	244	256	10	19	-5.83
Jr02_17180_p1	JrWRKY13	Jre-miR156e	GCACGUCUUUGUC	GAUAGAGAGC	244	256	10	19	-5.83
Jr02_17180_p1	JrWRKY13	Jre-miR156f	GCACGUCUUUGUC	GACAGAGAGC	244	256	10	19	-7.6
Jr02_17180_p1	JrWRKY13	Jre-miR156g	CUUUCUUGAU	AGAGAGAGAG	212	221	9	18	-5.18
Jr02_17180_p1	JrWRKY13	Jre-miR156h	GUUCAACCCAACUUUCUU	AAGAGAGUGAGC	201	218	7	18	-6.81
Jr02_17180_p1	JrWRKY13	Jre-miR156i	GUUCAACCCAACUUUCUU	AAGAGAGUGAGC	201	218	7	18	-6.81
Jr02_17180_p1	JrWRKY13	Jre-miR156j	GUUCAACCCAACUUUCUU	AAGAGAGUGAGC	201	218	7	18	-6.81
Jr02_17180_p1	JrWRKY13	Jre-miR156k	GUUCAACCCAACUUUCUU	AAGAGAGUGAGC	201	218	7	18	-6.81
Jr02_17180_p1	JrWRKY13	Jre-miR156l	GUUCAACCCAACUUUCUU	AAGAGAGUGAGC	201	218	7	18	-6.81
Jr02_17180_p1	JrWRKY13	Jre-miR159a	CUCUUAUAAAAUCCAA	UUGGAUUGAAGGGAG	57	72	2	16	-10.33
Jr02_17180_p1	JrWRKY13	Jre-miR159b	GGCCCUUUUAGCCAA	UUGGACUGAAGGGAGCU	269	283	1	17	-8.91
Jr02_17180_p1	JrWRKY13	Jre-miR159c	GGCCCUUUUAGCCAA	UUGGACUGAAGGGAGCU	269	283	1	17	-8.91
Jr02_17180_p1	JrWRKY13	Jre-miR159d	GGCCCUUUUAGCCAA	UUGGACUGAAGGGAGCU	269	283	2	18	-9.9
Jr02_17180_p1	JrWRKY13	Jre-miR159e	CUCUUAUAAAAUCCAA	UUGGAUUGAAGGGAG	57	72	2	16	-9.86
Jr02_17180_p1	JrWRKY13	Jre-miR159f	GGCCCUUUUAGCCAAG	CUUGGAGUGAAGGGAGCU	269	284	1	18	-7.17
Jr02_17180_p1	JrWRKY13	Jre-miR159g	GGCCCUUUUAGCCAA	UUGGACUGAAGGGAGCU	269	283	1	17	-8.91
Jr02_17180_p1	JrWRKY13	Jre-miR159h	GGCCCUUUUAGCCAA	UUGGACUGAAGGGAGCU	269	283	1	17	-8.91
Jr02_17180_p1	JrWRKY13	Jre-miR159i	GGCCCUUUUAGCCAA	UUGGACUGAAGGGAGCU	269	283	1	17	-8.91
Jr02_17180_p1	JrWRKY13	Jre-miR159j	GGCCCUUUUAGCCAA	UUGGACUGAAGGGAGCU	269	283	1	17	-8.91
Jr02_17180_p1	JrWRKY13	Jre-miR159k	CUCUUAUAAAAUCCAA	UUGGAUUGAAGGGAG	57	72	2	16	-9.86
Jr02_17180_p1	JrWRKY13	Jre-miR160a	GGCAGUGCGGGCCAG	CUGGCUCCCUGAAUGCC	14	28	4	20	-5.75
Jr02_17180_p1	JrWRKY13	Jre-miR160b	GGCAGUGCGGGCCAG	CUGGCUCCCUGAAUGCC	14	28	4	20	-5.75
Jr02_17180_p1	JrWRKY13	Jre-miR160c	GCGUGCAGAUGCC	GGCUCCCUGUAUGC	392	404	6	19	-7.25
Jr02_17180_p1	JrWRKY13	Jre-miR160d	GCGUGCAGAUGCC	GGCUCCCUGUAUGC	392	404	6	19	-7.25
Jr02_17180_p1	JrWRKY13	Jre-miR160e	GCGUGCAGAUGCC	GGCUCCCUGUAUGC	392	404	6	19	-7.25
Jr02_17180_p1	JrWRKY13	Jre-miR160f	GCGUGCAGAUGCC	GGCUCCCUGUAUGC	392	404	6	19	-7.25
Jr02_17180_p1	JrWRKY13	Jre-miR162a	CUGCGUGCAGA	UCUGCAUCCAG	390	400	11	21	-9.19
Jr02_17180_p1	JrWRKY13	Jre-miR162b	CUGCGUGCAGA	UCUGCAUCCAG	390	400	11	21	-9.19
Jr02_17180_p1	JrWRKY13	Jre-miR164a	CCCUACAUUCUUCA	UGGAGAAGCAGGG	225	238	1	13	-7.9
Jr02_17180_p1	JrWRKY13	Jre-miR164b	CCCUACAUUCUUCA	UGGAGAAGCAGGG	225	238	1	13	-7.9
Jr02_17180_p1	JrWRKY13	Jre-miR164c	CCCUACAUUCUUCA	UGGAGAAGCAGGG	225	238	1	13	-7.9
Jr02_17180_p1	JrWRKY13	Jre-miR164d	CCCUACAUUCUUCA	UGGAGAAGCAGGG	225	238	1	13	-7.9
Jr02_17180_p1	JrWRKY13	Jre-miR164e	CCCUACAUUCUUCA	UGGAGAAGCAGGG	225	238	1	13	-7.9
Jr02_17180_p1	JrWRKY13	Jre-miR165a	GUUUGGUUU	GGACCAGGC	182	190	3	11	-6.13
Jr02_17180_p1	JrWRKY13	Jre-miR165b	GUUUGGUUU	GGACCAGGC	182	190	3	11	-6.13
Jr02_17180_p1	JrWRKY13	Jre-miR165c	GUUUGGUUU	GGACCAGGC	182	190	3	11	-6.13
Jr02_17180_p1	JrWRKY13	Jre-miR165d	GUUUGGUUU	GGACCAGGC	182	190	3	11	-6.13
Jr02_17180_p1	JrWRKY13	Jre-miR165e	GUUUGGUUU	GGACCAGGC	182	190	3	11	-6.13
Jr02_17180_p1	JrWRKY13	Jre-miR165f	GUUUGGUUU	GGACCAGGC	182	190	3	11	-6.13
Jr02_17180_p1	JrWRKY13	Jre-miR165g	GUUUGGUUU	GGACCAGGC	182	190	3	11	-6.13
Jr02_17180_p1	JrWRKY13	Jre-miR165h	GUUUGGUUU	GGACCAGGC	182	190	3	11	-6.13
Jr02_17180_p1	JrWRKY13	Jre-miR165i	GUUUGGUUU	GGACCAGGC	182	190	3	11	-6.13
Jr02_17180_p1	JrWRKY13	Jre-miR165j	GUUUGGUUU	GGACCAGGC	182	190	3	11	-6.13
Jr02_17180_p1	JrWRKY13	Jre-miR165k	GUUUGGUUU	GGACCAGGC	182	190	3	11	-6.13
Jr02_17180_p1	JrWRKY13	Jre-miR165l	GUUUGGUUU	GGACCAGGC	182	190	3	11	-6.13
Jr02_17180_p1	JrWRKY13	Jre-miR165m	GUUUGGUUU	GGACCAGGC	182	190	3	11	-6.21
Jr02_17180_p1	JrWRKY13	Jre-miR166a	GUUUGGUUU	GGACCAGGC	182	190	5	13	-6.82
Jr02_17180_p1	JrWRKY13	Jre-miR167a	GGAUCGU	AUGAUCU	196	202	14	20	-3.32
Jr02_17180_p1	JrWRKY13	Jre-miR167b	GGAUCGU	AUGAUCU	196	202	14	20	-3.32
Jr02_17180_p1	JrWRKY13	Jre-miR167c	GGAUCGU	AUGAUCU	196	202	14	20	-3.32
Jr02_17180_p1	JrWRKY13	Jre-miR167d	GGAUCGU	AUGAUCU	196	202	14	20	-3.61
Jr02_17180_p1	JrWRKY13	Jre-miR167e	GGAUCGU	AUGAUCU	196	202	14	20	-3.32
Jr02_17180_p1	JrWRKY13	Jre-miR167f	GGAUCGU	AUGAUCU	196	202	14	20	-3.61
Jr02_17180_p1	JrWRKY13	Jre-miR167g	CGGAUCGU	AUGAUCUG	195	202	14	21	-4.97
Jr02_17180_p1	JrWRKY13	Jre-miR167h	CGGAUCGU	AUGAUCUG	195	202	14	21	-4.97
Jr02_17180_p1	JrWRKY13	Jre-miR168a	CUGUACCGA	UUGGUGCAG	91	99	5	13	-6.14
Jr02_17180_p1	JrWRKY13	Jre-miR169a	GCACGUCUUUG	CAAGGAUGACUUGC	244	254	5	18	-3.73
Jr02_17180_p1	JrWRKY13	Jre-miR169b	GCACGUCUUUG	CAAGGAUGACUUGC	244	254	5	18	-3.73
Jr02_17180_p1	JrWRKY13	Jre-miR169c	GCACGUCUUUG	CAAGGAUGACUUGC	244	254	5	18	-3.73
Jr02_17180_p1	JrWRKY13	Jre-miR169d	GCACGUCUUUG	CAAGGAUGACUUGC	244	254	5	18	-3.73
Jr02_17180_p1	JrWRKY13	Jre-miR169e	GCACGUCUUUG	CAAGGAUGACUUGC	244	254	5	18	-3.73
Jr02_17180_p1	JrWRKY13	Jre-miR169f	GCACGUCUUUG	CAAGGAUGACUUGC	244	254	5	18	-3.73
Jr02_17180_p1	JrWRKY13	Jre-miR169g	GCACGUCUUUG	CAAGGAUGACUUGC	244	254	5	18	-3.73
Jr02_17180_p1	JrWRKY13	Jre-miR169h	CAGUAAUGUUUGGUUU	AAGCCAAGGAUGAAUUG	175	190	1	17	-6.39
Jr02_17180_p1	JrWRKY13	Jre-miR169i	UGGCGAG	CUUGCCG	358	364	14	20	-4.6
Jr02_17180_p1	JrWRKY13	Jre-miR169j	UGGCGAG	CUUGCCG	358	364	14	20	-4.6
Jr02_17180_p1	JrWRKY13	Jre-miR169k	UGGCGAG	CUUGCCG	358	364	14	20	-4.6
Jr02_17180_p1	JrWRKY13	Jre-miR170a	CGGGCCAGUG	UAUUGGCCUG	21	30	1	10	-8.18
Jr02_17180_p1	JrWRKY13	Jre-miR170b	CGGGCCAGUG	UAUUGGCCUG	21	30	1	10	-8.18
Jr02_17180_p1	JrWRKY13	Jre-miR170c	AGUAAUGUUUGGUUUAA	UUGAGCCGCGCCAAUAUCACU	176	192	1	21	-4.04
Jr02_17180_p1	JrWRKY13	Jre-miR170d	UGGUUUAA	UUGAGCCG	185	192	1	8	-2.75
Jr02_17180_p1	JrWRKY13	Jre-miR170e	AGUAAUGUUUGGUUUAA	UUGAGCCGCGCCAAUAUCACU	176	192	1	21	-4.04
Jr02_17180_p1	JrWRKY13	Jre-miR170f	UGGUUUAA	UUGAGCCG	185	192	1	8	-2.76
Jr02_17180_p1	JrWRKY13	Jre-miR170g	GUUUGGUUUAA	UUGAGCCGUGC	182	192	4	14	-2.75
Jr02_17180_p1	JrWRKY13	Jre-miR170h	GUUUGGUUUAA	UUGAGCCGUGC	182	192	4	14	-2.75
Jr02_17180_p1	JrWRKY13	Jre-miR170i	GUUUGGUUUAA	UUGAGCCGUGC	182	192	4	14	-2.75
Jr02_17180_p1	JrWRKY13	Jre-miR170j	GUUUGGUUUAA	UUGAGCCGUGC	182	192	4	14	-2.75
Jr02_17180_p1	JrWRKY13	Jre-miR170k	GUUUGGUUUAA	UUGAGCCGUGC	182	192	4	14	-2.75
Jr02_17180_p1	JrWRKY13	Jre-miR170l	GUUUGGUUUAA	UUGAGCCGUGC	182	192	4	14	-2.75
Jr02_17180_p1	JrWRKY13	Jre-miR170m	GUUUGGUUUAA	UUGAGCCGUGC	182	192	4	14	-2.75
Jr02_17180_p1	JrWRKY13	Jre-miR170n	GUUUGGUUUA	UGAGCCGAAC	182	191	1	10	-7.77
Jr02_17180_p1	JrWRKY13	Jre-miR170o	GUUUGGUUUAA	UUGAGCCAUGC	182	192	4	14	-3.45
Jr02_17180_p1	JrWRKY13	Jre-miR172a	UGUGGCG	UGCUGCA	356	362	14	20	-2.2
Jr02_17180_p1	JrWRKY13	Jre-miR172b	CUGUGGC	GCUGCAG	355	361	15	21	-4.11
Jr02_17180_p1	JrWRKY13	Jre-miR172c	UGUGGCG	UGCUGCA	356	362	14	20	-2.2
Jr02_17180_p1	JrWRKY13	Jre-miR172d	UGUGGCG	UGCUGCA	356	362	14	20	-2.2
Jr02_17180_p1	JrWRKY13	Jre-miR172e	CUGUGGC	GCUGCAG	355	361	15	21	-4.11
Jr02_17180_p1	JrWRKY13	Jre-miR172f	UGUGGCG	UGCUGCA	356	362	14	20	-2.2
Jr02_17180_p1	JrWRKY13	Jre-miR2111a	GUGCAGAU	AUCUGCAU	394	401	3	10	-5.38
Jr02_17180_p1	JrWRKY13	Jre-miR2111b	GUGCAGAU	AUCUGCAU	394	401	3	10	-5.38
Jr02_17180_p1	JrWRKY13	Jre-miR390a	CUUUCUUGA	UCAGGAGGG	212	220	5	13	-6.6
Jr02_17180_p1	JrWRKY13	Jre-miR390b	CUUUCUUGA	UCAGGAGGG	212	220	5	13	-6.6
Jr02_17180_p1	JrWRKY13	Jre-miR390c	CUUUCUUGA	UCAGGAGGG	212	220	5	13	-6.67
Jr02_17180_p1	JrWRKY13	Jre-miR393a	GGUUAAUGU	GCAUUGAUC	31	39	13	21	-5.88
Jr02_17180_p1	JrWRKY13	Jre-miR393b	GGUUAAUGU	GCAUUGAUC	31	39	13	21	-5.88
Jr02_17180_p1	JrWRKY13	Jre-miR393c	GGGUUAAUGU	GCAUUGAUCU	30	39	13	22	-6.08
Jr02_17180_p1	JrWRKY13	Jre-miR395a	UUCUUCACAAACGC	GUGUUUGGGGGAA	232	245	6	18	-10.67
Jr02_17180_p1	JrWRKY13	Jre-miR395b	UUCUUCACAAACGC	GUGUUUGGGGGAA	232	245	6	18	-10.67
Jr02_17180_p1	JrWRKY13	Jre-miR395c	UUCUUCACAAACGC	GUGUUUGGGGGAA	232	245	6	18	-10.67
Jr02_17180_p1	JrWRKY13	Jre-miR395d	UUCUUCACAAACGC	GUGUUUGGGGGAA	232	245	6	18	-10.67
Jr02_17180_p1	JrWRKY13	Jre-miR395e	UUCUUCACAAACGC	GUGUUUGGGGGAA	232	245	6	18	-10.67
Jr02_17180_p1	JrWRKY13	Jre-miR395f	UUCUUCACAAACGC	GUGUUUGGGGGAA	232	245	6	18	-10.67
Jr02_17180_p1	JrWRKY13	Jre-miR395g	UUCUUCACAAACGC	GUGUUUGGGGGAA	232	245	6	18	-10.67
Jr02_17180_p1	JrWRKY13	Jre-miR395h	UUCUUCACAAACGC	GUGUUUGGGGGAA	232	245	6	18	-10.67
Jr02_17180_p1	JrWRKY13	Jre-miR395i	UUCUUCACAAACGC	GUGUUUGGGGGAA	232	245	6	18	-10.67
Jr02_17180_p1	JrWRKY13	Jre-miR395j	UUCUUCACAAACGC	GUGUUUGGGGGAA	232	245	6	18	-10.67
Jr02_17180_p1	JrWRKY13	Jre-miR396a	AAGAAGG	CUUUCUU	325	331	9	15	-6.29
Jr02_17180_p1	JrWRKY13	Jre-miR396b	AAGAAGG	CUUUCUU	325	331	9	15	-5.54
Jr02_17180_p1	JrWRKY13	Jre-miR396c	AAGAAGG	CUUUCUU	325	331	9	15	-5.54
Jr02_17180_p1	JrWRKY13	Jre-miR396d	AAGAAGG	CUUUCUU	325	331	9	15	-5.54
Jr02_17180_p1	JrWRKY13	Jre-miR396e	AAGAAGG	CUUUCUU	325	331	9	15	-6.26
Jr02_17180_p1	JrWRKY13	Jre-miR396f	AAGAAGG	CUUUCUU	325	331	9	15	-6.26
Jr02_17180_p1	JrWRKY13	Jre-miR397a	GUUAAUGUCUGGCCUCA	UGAGUGCAGCGUUGAU	32	48	5	20	-5.62
Jr02_17180_p1	JrWRKY13	Jre-miR398a	GUGAUCUGCGUGCA	UGUUCUCAGGUCAC	385	398	3	16	-6.47
Jr02_17180_p1	JrWRKY13	Jre-miR398b	GUGAUCUGCGUGCA	UGUUCUCAGGUCAC	385	398	3	16	-6.47
Jr02_17180_p1	JrWRKY13	Jre-miR398c	GUGAUCUGCGUGCA	UGUUCUCAGGUCGC	385	398	3	16	-4.59
Jr02_17180_p1	JrWRKY13	Jre-miR398d	GUGAUCUGCGUGCA	UGUUCUCAGGUCGC	385	398	3	16	-4.59
Jr02_17180_p1	JrWRKY13	Jre-miR398e	GUGAUCUGCGUGCA	UGUUCUCAGGUCGC	385	398	3	16	-4.59
Jr02_17180_p1	JrWRKY13	Jre-miR398f	GUGAUCUGCGUGCA	UGUUCUCAGGUCGC	385	398	3	16	-4.61
Jr02_17180_p1	JrWRKY13	Jre-miR399a	UAGGGCAGU	AUUGCCCUG	11	19	13	21	-8.06
Jr02_17180_p1	JrWRKY13	Jre-miR399b	UAGGGCAGU	AUUGCCCUG	11	19	13	21	-8.06
Jr02_17180_p1	JrWRKY13	Jre-miR399c	CAACUUUCUU	AGGAGAGUUG	209	218	7	16	-7.06
Jr02_17180_p1	JrWRKY13	Jre-miR399d	CAACUUUCUU	AGGAGAGUUG	209	218	7	16	-7.06
Jr02_17180_p1	JrWRKY13	Jre-miR399e	CAACUUUCUU	AGGAGAGUUG	209	218	7	16	-7.36
Jr02_17180_p1	JrWRKY13	Jre-miR399f	CAACUUUCUU	AGGAGAGUUG	209	218	7	16	-7.36
Jr02_17180_p1	JrWRKY13	Jre-miR403a	GUGGGUU	GAUUCAC	28	34	4	10	-2.68
Jr02_17180_p1	JrWRKY13	Jre-miR403b	GUGGGUU	GAUUCAC	28	34	4	10	-2.68
Jr02_17180_p1	JrWRKY13	Jre-miR408a	GGGCAGUGC	GCACUGCCU	13	21	3	11	-11.02
Jr02_17180_p1	JrWRKY13	Jre-miR477a	GUCUUUGUCCGA	UCCCUCAAAGGC	248	259	1	12	-3.46
Jr02_17180_p1	JrWRKY13	Jre-miR477b	GUCUUUGUCCGA	UCCCUCAAAGGC	248	259	1	12	-3.46
Jr02_17180_p1	JrWRKY13	Jre-miR477c	GUCUUUGUCCGA	UCCCUCAAAGGC	248	259	1	12	-3.46
Jr02_17180_p1	JrWRKY13	Jre-miR477d	GUCUUUGUCCGA	UCCCUCAAAGGC	248	259	1	12	-3.46
Jr02_17180_p1	JrWRKY13	Jre-miR477e	AAGAACGGAUGAGAGA	UCUCUCAAGGGCUUCUU	306	321	4	20	-9.1
Jr02_17180_p1	JrWRKY13	Jre-miR482a	AGUGGGU	GCCCAUU	27	33	12	18	-5.23
Jr02_17180_p1	JrWRKY13	Jre-miR482b	AGUGGGU	GCCCAUU	27	33	12	18	-5.15
Jr02_17180_p1	JrWRKY13	Jre-miR482c	GUAAUGUUUGGUUUA	UAGACCACCCAUUCC	177	191	6	20	-6.56
Jr02_17180_p1	JrWRKY13	Jre-miR482d	GGUGGAA	UUCCACC	154	160	8	14	-7.82
Jr02_17180_p1	JrWRKY13	Jre-miR530a	UGCGUGCAGAUGC	GCAUUUGCACCUGCA	391	403	2	16	-11.15
Jr02_17180_p1	JrWRKY13	Jre-miR530b	UGCGUGCAGAUGC	GCAUUUGCACCUGCA	391	403	2	16	-11.15
Jr02_17180_p1	JrWRKY13	Jre-miR530c	UGCGUGCAGAUGC	GCAUUUGCACCUGCA	391	403	2	16	-11.15
Jr02_17180_p1	JrWRKY13	Jre-miR530d	UGCGUGCAGAUGC	GCAUUUGCACCUGCA	391	403	2	16	-11.15
Jr02_17180_p1	JrWRKY13	Jre-miR5675a	AUUCUUCA	UGAGGGAU	231	238	13	20	-4.79
Jr02_17180_p1	JrWRKY13	Jre-miR7972a	AAUCCAACUUGACA	UGUCAGGGUUGUGAUU	66	79	2	17	-10.35
Jr02_17180_p1	JrWRKY13	Jre-miRN745a	AUCUGUGGCGAGAACU	GGUCGUUGCGAUUACGGGU	353	368	4	22	-4.45
Jr02_17180_p1	JrWRKY13	Jre-miRN745b	AUCUGUGGCGAGAACU	GGUCGUUGCGAUUACGGGU	353	368	4	22	-4.45
Jr02_17180_p1	JrWRKY13	Jre-miRN745c	AUCUGUGGCGAGAACU	GGUCGUUGCGAUUACGGGU	353	368	4	22	-4.45
Jr02_17180_p1	JrWRKY13	Jre-miRN5866	AAUGUUUGGUUUAAGUCGG	CCGAUUUAUACGAUUACAUU	179	197	2	21	-9.12
Jr02_17180_p1	JrWRKY13	Jre-miRN5867	AGAACGGAUGAGAGA	UCCUCGUUUUACUUCU	307	321	7	22	-5.73
Jr02_17180_p1	JrWRKY13	Jre-miRN5869	UGCGUGCAGAUGCCC	GGGCGUCUCUUCCUUUGCA	391	405	1	19	-10.01
Jr02_17180_p1	JrWRKY13	Jre-miRN5870	GCGGGCCAGUGGGU	ACCCAUUCCGC	20	33	12	22	-6.19
Jr02_17180_p1	JrWRKY13	Jre-miRN5871	CCCUACAGUUAGGGC	GCUUUGGCAUGGG	2	16	12	24	-4.69
Jr02_17180_p1	JrWRKY13	Jre-miRN5872	UGUUUGGUUUAAGUC	GACUGAACCGGAGG	181	195	8	21	-7.07
Jr02_17180_p1	JrWRKY13	Jre-miRN5873	AGUUAGGGCAGU	ACUGUCUCUGGCU	8	19	10	22	-7.05
Jr02_17180_p1	JrWRKY13	Jre-miRN5874	UUCUUCACAAACG	CGUUUUGAGGGA	232	244	8	19	-7.07
Jr02_17180_p1	JrWRKY13	Jre-miRN5875	CUGCAACAGCUUGAGUAUGUG	CAUGUGCUCUUGCUCUCCAG	367	387	1	20	-7.46
Jr02_17180_p1	JrWRKY13	Jre-miRN5876	ACGGAUGAGAGA	UCUCUAUCUGU	310	321	8	18	-9.95
Jr02_17180_p1	JrWRKY13	Jre-miRN5877	UUUCUUGAUAUACCCU	AGGGAAAACUGAGGAG	213	228	3	18	-6.13
Jr02_17180_p1	JrWRKY13	Jre-miRN5878	UUUGGUUUAAGUCGG	UUGAUGUGAACCAAA	183	197	3	17	-7.28
Jr02_17180_p1	JrWRKY13	Jre-miRN5879	UUAGGGC	GUUCUGA	10	16	3	9	-3.02
Jr02_17180_p1	JrWRKY13	Jre-miRN5880	CGGAUGAGAGAAAAAAGAAGG	CCGUGUUUCUCUGUAUAAG	311	331	3	21	-6.08
Jr02_17180_p1	JrWRKY13	Jre-miRN5881	UUAGGGC	GUUCUGA	10	16	3	9	-3.02
Jr02_17180_p1	JrWRKY13	Jre-miRN5882	AGAGAAAAAAGAAGGAAA	UUUCCUUCAACACUUCUCU	317	334	4	22	-13.9
Jr02_17180_p1	JrWRKY13	Jre-miRN5883	CAGCUUGAGUAUGUGAUCUGCG	CGGGGGACUGCUCGAGCUG	373	394	1	19	-10.53
Jr02_17180_p1	JrWRKY13	Jre-miRN5884	GUUUAAGUCGGAUCGUUCA	UGAGCGGUUACCUGAGC	187	205	2	18	-6.13
Jr02_17180_p1	JrWRKY13	Jre-miRN5885	GAUGGUGGA	UUCACCAUC	151	159	13	21	-9.02
Jr02_17180_p1	JrWRKY13	Jre-miRN5886	UUGUCCGAUGCCU	GGGCAAUUACACCUUGGGCAG	252	264	1	21	-7.95
Jr02_17180_p1	JrWRKY13	Jre-miRN5887	CGUGCAGAUG	CGUCUGUAUG	393	402	1	10	-7.66
Jr02_17180_p1	JrWRKY13	Jre-miRN5888	CCUACAUUCUUCAC	GUUGACGAUGUAGG	226	239	4	17	-8.92
Jr02_17180_p1	JrWRKY13	Jre-miRN5889	AUUCUUCACAAACGCACGU	AUGGCACAGUGAAGAAU	231	249	3	19	-10.72
Jr02_17180_p1	JrWRKY13	Jre-miRN5890	UGUUUUCCUAAUCCUUA	UGAGGAUGAAUAGAAAAUA	127	143	3	21	-6.21
Jr02_17180_p1	JrWRKY13	Jre-miRN5891	AGAUGAUGU	GCAUCGUCU	121	129	11	19	-5.87
Jr02_17180_p1	JrWRKY13	Jre-miRN5892	CUGCAACAGCUUGAGUAUGUG	CAUGUGCUCUAGCUCUCCAG	367	387	1	20	-8.62
Jr02_17180_p1	JrWRKY13	Jre-miRN5893	AGAACGGAUGAGAGAA	UUCUCUCAAAGGCUUCU	307	322	5	21	-10.2
Jr02_17180_p1	JrWRKY13	Jre-miRN5894	GAUGCCCCUU	GAGAGGGCAUC	399	408	11	21	-9.18
Jr02_17180_p1	JrWRKY13	Jre-miRN5895	CCCUACAUUCUUCACAAA	UUUGUUGGAGAAGCAGGGG	225	242	2	20	-10.63
Jr02_17180_p1	JrWRKY13	Jre-miRN5896	CCCUACAUUCUUCACAAA	UUUGUUGGAGAAGCAGGGG	225	242	2	20	-10.63
Jr02_17180_p1	JrWRKY13	Jre-miRN5897	CCCUACAUUCUUCACAAA	UUUGUUGGAGAAGCAGGGG	225	242	2	20	-10.63
Jr02_17180_p1	JrWRKY13	Jre-miRN5898	CCCUACAUUCUUCACAAA	UUUGUUGGAGAAGCAGGGG	225	242	2	20	-10.63
Jr02_17180_p1	JrWRKY13	Jre-miRN5899	UCUUAUAAA	UUUGUGGGA	58	66	1	9	-5.51
Jr02_17180_p1	JrWRKY13	Jre-miRN5900	UCCUUAUUUUAAUGAUGGU	GCCAUCGUUCUGGGA	138	156	2	16	-6.57
Jr02_17180_p1	JrWRKY13	Jre-miRN5901	UUUAGCCAAGUUGGA	UCCCCUCGGCUGAA	275	289	7	20	-6.05
Jr02_17180_p1	JrWRKY13	Jre-miRN5904	UGAUGUU	AAUAUCG	124	130	7	13	-3.32
Jr02_17180_p1	JrWRKY13	Jre-miRN5905	CAUUCUUCACAAACGCACGUCUU	GAGGCCUUGGGGGAGAGUG	230	252	2	20	-8.26
Jr02_17180_p1	JrWRKY13	Jre-miRN5906	AGCCAAG	CUUGGCU	278	284	11	17	-5.06
Jr02_17180_p1	JrWRKY13	Jre-miRN5907	UUAAUGAUGGUGGAAAUUAAG	CUUGACCACUUCAUUGG	146	166	5	21	-5.65
Jr02_17180_p1	JrWRKY13	Jre-miRN5908	CGGAUGAGAGA	UCUUUUAACUG	311	321	9	19	-6.54
Jr02_17180_p1	JrWRKY13	Jre-miRN5909	GUCGGAU	AUCUGAU	193	199	10	16	-4.48
Jr02_17180_p1	JrWRKY13	Jre-miRN5910	CUUGACAUAC	GUAUGUUGGG	73	82	1	10	-8.55
Jr02_17180_p1	JrWRKY13	Jre-miRN5911	AGCUUGAGUAUGU	GCGUACUUGGGCU	374	386	9	21	-7.49
Jr02_17180_p1	JrWRKY13	Jre-miRN5912	AGAGAUG	CAUCUCU	119	125	1	7	-4.01
Jr02_17190_p1	JrWRKY14	Jre-miR156a	GUUCAACCCAACUUUCUU	AAGAGAGUGAGC	70	87	7	18	-7.29
Jr02_17190_p1	JrWRKY14	Jre-miR156b	GCACGUCUUUGUC	GAUAGAGAGC	113	125	10	19	-4.89
Jr02_17190_p1	JrWRKY14	Jre-miR156c	GCACGUCUUUGUC	GAUAGAGAGC	113	125	10	19	-4.89
Jr02_17190_p1	JrWRKY14	Jre-miR156d	GCACGUCUUUGUC	GAUAGAGAGC	113	125	10	19	-4.89
Jr02_17190_p1	JrWRKY14	Jre-miR156e	GCACGUCUUUGUC	GAUAGAGAGC	113	125	10	19	-4.89
Jr02_17190_p1	JrWRKY14	Jre-miR156f	GCACGUCUUUGUC	GACAGAGAGC	113	125	10	19	-6.66
Jr02_17190_p1	JrWRKY14	Jre-miR156g	CUUUCUUGAU	AGAGAGAGAG	81	90	9	18	-5.51
Jr02_17190_p1	JrWRKY14	Jre-miR156h	GUUCAACCCAACUUUCUU	AAGAGAGUGAGC	70	87	7	18	-7.29
Jr02_17190_p1	JrWRKY14	Jre-miR156i	GUUCAACCCAACUUUCUU	AAGAGAGUGAGC	70	87	7	18	-7.29
Jr02_17190_p1	JrWRKY14	Jre-miR156j	GUUCAACCCAACUUUCUU	AAGAGAGUGAGC	70	87	7	18	-7.29
Jr02_17190_p1	JrWRKY14	Jre-miR156k	GUUCAACCCAACUUUCUU	AAGAGAGUGAGC	70	87	7	18	-7.29
Jr02_17190_p1	JrWRKY14	Jre-miR156l	GUUCAACCCAACUUUCUU	AAGAGAGUGAGC	70	87	7	18	-7.29
Jr02_17190_p1	JrWRKY14	Jre-miR159a	GGCCCUUUUAGCCAA	UUGGAUUGAAGGGAGCU	138	152	2	18	-9.52
Jr02_17190_p1	JrWRKY14	Jre-miR159b	GGCCCUUUUAGCCAA	UUGGACUGAAGGGAGCU	138	152	1	17	-8.91
Jr02_17190_p1	JrWRKY14	Jre-miR159c	GGCCCUUUUAGCCAA	UUGGACUGAAGGGAGCU	138	152	1	17	-8.91
Jr02_17190_p1	JrWRKY14	Jre-miR159d	GGCCCUUUUAGCCAA	UUGGACUGAAGGGAGCU	138	152	2	18	-9.9
Jr02_17190_p1	JrWRKY14	Jre-miR159e	GGCCCUUUUAGCCAA	UUGGAUUGAAGGGAGCU	138	152	2	18	-9.25
Jr02_17190_p1	JrWRKY14	Jre-miR159f	GAUGCCCCUUCG	UGAAGGGAGCUC	268	279	8	19	-4.36
Jr02_17190_p1	JrWRKY14	Jre-miR159g	GGCCCUUUUAGCCAA	UUGGACUGAAGGGAGCU	138	152	1	17	-8.91
Jr02_17190_p1	JrWRKY14	Jre-miR159h	GGCCCUUUUAGCCAA	UUGGACUGAAGGGAGCU	138	152	1	17	-8.91
Jr02_17190_p1	JrWRKY14	Jre-miR159i	GGCCCUUUUAGCCAA	UUGGACUGAAGGGAGCU	138	152	1	17	-8.91
Jr02_17190_p1	JrWRKY14	Jre-miR159j	GGCCCUUUUAGCCAA	UUGGACUGAAGGGAGCU	138	152	1	17	-8.91
Jr02_17190_p1	JrWRKY14	Jre-miR159k	GGCCCUUUUAGCCAA	UUGGAUUGAAGGGAGCU	138	152	2	18	-9.25
Jr02_17190_p1	JrWRKY14	Jre-miR160c	GCGUGCAGAUGCC	GGCUCCCUGUAUGC	261	273	6	19	-7.25
Jr02_17190_p1	JrWRKY14	Jre-miR160d	GCGUGCAGAUGCC	GGCUCCCUGUAUGC	261	273	6	19	-7.25
Jr02_17190_p1	JrWRKY14	Jre-miR160e	GCGUGCAGAUGCC	GGCUCCCUGUAUGC	261	273	6	19	-7.25
Jr02_17190_p1	JrWRKY14	Jre-miR160f	GCGUGCAGAUGCC	GGCUCCCUGUAUGC	261	273	6	19	-7.25
Jr02_17190_p1	JrWRKY14	Jre-miR162a	CUGCGUGCAGA	UCUGCAUCCAG	259	269	11	21	-9.19
Jr02_17190_p1	JrWRKY14	Jre-miR162b	CUGCGUGCAGA	UCUGCAUCCAG	259	269	11	21	-9.19
Jr02_17190_p1	JrWRKY14	Jre-miR164a	CCCUACAUUCUUCA	UGGAGAAGCAGGG	94	107	1	13	-8.12
Jr02_17190_p1	JrWRKY14	Jre-miR164b	CCCUACAUUCUUCA	UGGAGAAGCAGGG	94	107	1	13	-8.12
Jr02_17190_p1	JrWRKY14	Jre-miR164c	CCCUACAUUCUUCA	UGGAGAAGCAGGG	94	107	1	13	-8.12
Jr02_17190_p1	JrWRKY14	Jre-miR164d	CCCUACAUUCUUCA	UGGAGAAGCAGGG	94	107	1	13	-8.12
Jr02_17190_p1	JrWRKY14	Jre-miR164e	CCCUACAUUCUUCA	UGGAGAAGCAGGG	94	107	1	13	-8.12
Jr02_17190_p1	JrWRKY14	Jre-miR165a	GUUUGGUUU	GGACCAGGC	51	59	3	11	-3.63
Jr02_17190_p1	JrWRKY14	Jre-miR165b	GUUUGGUUU	GGACCAGGC	51	59	3	11	-3.63
Jr02_17190_p1	JrWRKY14	Jre-miR165c	GUUUGGUUU	GGACCAGGC	51	59	3	11	-3.63
Jr02_17190_p1	JrWRKY14	Jre-miR165d	GUUUGGUUU	GGACCAGGC	51	59	3	11	-3.63
Jr02_17190_p1	JrWRKY14	Jre-miR165e	GUUUGGUUU	GGACCAGGC	51	59	3	11	-3.63
Jr02_17190_p1	JrWRKY14	Jre-miR165f	GUUUGGUUU	GGACCAGGC	51	59	3	11	-3.63
Jr02_17190_p1	JrWRKY14	Jre-miR165g	GUUUGGUUU	GGACCAGGC	51	59	3	11	-3.63
Jr02_17190_p1	JrWRKY14	Jre-miR165h	GUUUGGUUU	GGACCAGGC	51	59	3	11	-3.63
Jr02_17190_p1	JrWRKY14	Jre-miR165i	GUUUGGUUU	GGACCAGGC	51	59	3	11	-3.63
Jr02_17190_p1	JrWRKY14	Jre-miR165j	GUUUGGUUU	GGACCAGGC	51	59	3	11	-3.63
Jr02_17190_p1	JrWRKY14	Jre-miR165k	GUUUGGUUU	GGACCAGGC	51	59	3	11	-3.63
Jr02_17190_p1	JrWRKY14	Jre-miR165l	GUUUGGUUU	GGACCAGGC	51	59	3	11	-3.63
Jr02_17190_p1	JrWRKY14	Jre-miR165m	GUUUGGUUU	GGACCAGGC	51	59	3	11	-3.71
Jr02_17190_p1	JrWRKY14	Jre-miR166a	GUUUGGUUU	GGACCAGGC	51	59	5	13	-4.31
Jr02_17190_p1	JrWRKY14	Jre-miR167a	GGAUCGU	AUGAUCU	65	71	14	20	-2.57
Jr02_17190_p1	JrWRKY14	Jre-miR167b	GGAUCGU	AUGAUCU	65	71	14	20	-2.57
Jr02_17190_p1	JrWRKY14	Jre-miR167c	GGAUCGU	AUGAUCU	65	71	14	20	-2.57
Jr02_17190_p1	JrWRKY14	Jre-miR167d	GGAUCGU	AUGAUCU	65	71	14	20	-2.81
Jr02_17190_p1	JrWRKY14	Jre-miR167e	GGAUCGU	AUGAUCU	65	71	14	20	-2.57
Jr02_17190_p1	JrWRKY14	Jre-miR167f	GGAUCGU	AUGAUCU	65	71	14	20	-2.81
Jr02_17190_p1	JrWRKY14	Jre-miR167g	CGGAUCGU	AUGAUCUG	64	71	14	21	-4.13
Jr02_17190_p1	JrWRKY14	Jre-miR167h	CGGAUCGU	AUGAUCUG	64	71	14	21	-4.13
Jr02_17190_p1	JrWRKY14	Jre-miR168a	UUCUUGAUAUACC	GGUGCAGGUCGGGAA	83	95	7	21	-5.05
Jr02_17190_p1	JrWRKY14	Jre-miR169a	GCACGUCUUUG	CAAGGAUGACUUGC	113	123	5	18	-3.06
Jr02_17190_p1	JrWRKY14	Jre-miR169b	GCACGUCUUUG	CAAGGAUGACUUGC	113	123	5	18	-3.06
Jr02_17190_p1	JrWRKY14	Jre-miR169c	GCACGUCUUUG	CAAGGAUGACUUGC	113	123	5	18	-3.06
Jr02_17190_p1	JrWRKY14	Jre-miR169d	GCACGUCUUUG	CAAGGAUGACUUGC	113	123	5	18	-3.06
Jr02_17190_p1	JrWRKY14	Jre-miR169e	GCACGUCUUUG	CAAGGAUGACUUGC	113	123	5	18	-3.06
Jr02_17190_p1	JrWRKY14	Jre-miR169f	GCACGUCUUUG	CAAGGAUGACUUGC	113	123	5	18	-3.06
Jr02_17190_p1	JrWRKY14	Jre-miR169g	GCACGUCUUUG	CAAGGAUGACUUGC	113	123	5	18	-3.06
Jr02_17190_p1	JrWRKY14	Jre-miR169h	GCACGUCUUUG	CAAGGAUGAAUUGC	113	123	5	18	-5.72
Jr02_17190_p1	JrWRKY14	Jre-miR169i	UGGCGAG	CUUGCCG	227	233	14	20	-4.6
Jr02_17190_p1	JrWRKY14	Jre-miR169j	UGGCGAG	CUUGCCG	227	233	14	20	-4.6
Jr02_17190_p1	JrWRKY14	Jre-miR169k	UGGCGAG	CUUGCCG	227	233	14	20	-4.6
Jr02_17190_p1	JrWRKY14	Jre-miR170c	UGGUUUAA	UUGAGCCG	54	61	1	8	-1.64
Jr02_17190_p1	JrWRKY14	Jre-miR170d	UGGUUUAA	UUGAGCCG	54	61	1	8	-1.18
Jr02_17190_p1	JrWRKY14	Jre-miR170e	UGGUUUAA	UUGAGCCG	54	61	1	8	-1.64
Jr02_17190_p1	JrWRKY14	Jre-miR170f	UGGUUUAA	UUGAGCCG	54	61	1	8	-1.19
Jr02_17190_p1	JrWRKY14	Jre-miR170g	UUCAAUC	GAUUGAG	218	224	2	8	-1.14
Jr02_17190_p1	JrWRKY14	Jre-miR170h	UUCAAUC	GAUUGAG	218	224	2	8	-1.14
Jr02_17190_p1	JrWRKY14	Jre-miR170i	UUCAAUC	GAUUGAG	218	224	2	8	-1.14
Jr02_17190_p1	JrWRKY14	Jre-miR170j	UUCAAUC	GAUUGAG	218	224	2	8	-1.14
Jr02_17190_p1	JrWRKY14	Jre-miR170k	UUCAAUC	GAUUGAG	218	224	2	8	-1.14
Jr02_17190_p1	JrWRKY14	Jre-miR170l	UUCAAUC	GAUUGAG	218	224	2	8	-1.14
Jr02_17190_p1	JrWRKY14	Jre-miR170m	UUCAAUC	GAUUGAG	218	224	2	8	-1.14
Jr02_17190_p1	JrWRKY14	Jre-miR170n	GUUUGGUUUA	UGAGCCGAAC	51	60	1	10	-5.43
Jr02_17190_p1	JrWRKY14	Jre-miR170o	UGGUUUAA	UUGAGCCA	54	61	4	11	-1.16
Jr02_17190_p1	JrWRKY14	Jre-miR172a	UGUGGCG	UGCUGCA	225	231	14	20	-2.2
Jr02_17190_p1	JrWRKY14	Jre-miR172b	CUGUGGC	GCUGCAG	224	230	15	21	-4.11
Jr02_17190_p1	JrWRKY14	Jre-miR172c	UGUGGCG	UGCUGCA	225	231	14	20	-2.2
Jr02_17190_p1	JrWRKY14	Jre-miR172d	UGUGGCG	UGCUGCA	225	231	14	20	-2.2
Jr02_17190_p1	JrWRKY14	Jre-miR172e	CUGUGGC	GCUGCAG	224	230	15	21	-4.11
Jr02_17190_p1	JrWRKY14	Jre-miR172f	UGUGGCG	UGCUGCA	225	231	14	20	-2.2
Jr02_17190_p1	JrWRKY14	Jre-miR2111a	GUGCAGAU	AUCUGCAU	263	270	3	10	-5.38
Jr02_17190_p1	JrWRKY14	Jre-miR2111b	GUGCAGAU	AUCUGCAU	263	270	3	10	-5.38
Jr02_17190_p1	JrWRKY14	Jre-miR390a	CUUUCUUGA	UCAGGAGGG	81	89	5	13	-6.91
Jr02_17190_p1	JrWRKY14	Jre-miR390b	CUUUCUUGA	UCAGGAGGG	81	89	5	13	-6.91
Jr02_17190_p1	JrWRKY14	Jre-miR390c	CUUUCUUGA	UCAGGAGGG	81	89	5	13	-6.98
Jr02_17190_p1	JrWRKY14	Jre-miR393a	AUGUGAUCU	GGAUCGCAU	252	260	8	16	-4.26
Jr02_17190_p1	JrWRKY14	Jre-miR393b	AUGUGAUCU	GGAUCGCAU	252	260	8	16	-4.26
Jr02_17190_p1	JrWRKY14	Jre-miR393c	GAGUAUGUGAUCU	GGAUCGCAUUGAUC	248	260	8	21	-3.41
Jr02_17190_p1	JrWRKY14	Jre-miR395a	UUCUUCACAAACGC	GUGUUUGGGGGAA	101	114	6	18	-10.88
Jr02_17190_p1	JrWRKY14	Jre-miR395b	UUCUUCACAAACGC	GUGUUUGGGGGAA	101	114	6	18	-10.88
Jr02_17190_p1	JrWRKY14	Jre-miR395c	UUCUUCACAAACGC	GUGUUUGGGGGAA	101	114	6	18	-10.88
Jr02_17190_p1	JrWRKY14	Jre-miR395d	UUCUUCACAAACGC	GUGUUUGGGGGAA	101	114	6	18	-10.88
Jr02_17190_p1	JrWRKY14	Jre-miR395e	UUCUUCACAAACGC	GUGUUUGGGGGAA	101	114	6	18	-10.88
Jr02_17190_p1	JrWRKY14	Jre-miR395f	UUCUUCACAAACGC	GUGUUUGGGGGAA	101	114	6	18	-10.88
Jr02_17190_p1	JrWRKY14	Jre-miR395g	UUCUUCACAAACGC	GUGUUUGGGGGAA	101	114	6	18	-10.88
Jr02_17190_p1	JrWRKY14	Jre-miR395h	UUCUUCACAAACGC	GUGUUUGGGGGAA	101	114	6	18	-10.88
Jr02_17190_p1	JrWRKY14	Jre-miR395i	UUCUUCACAAACGC	GUGUUUGGGGGAA	101	114	6	18	-10.88
Jr02_17190_p1	JrWRKY14	Jre-miR395j	UUCUUCACAAACGC	GUGUUUGGGGGAA	101	114	6	18	-10.88
Jr02_17190_p1	JrWRKY14	Jre-miR396a	AAGAAGG	CUUUCUU	194	200	9	15	-6.29
Jr02_17190_p1	JrWRKY14	Jre-miR396b	AAGAAGG	CUUUCUU	194	200	9	15	-5.54
Jr02_17190_p1	JrWRKY14	Jre-miR396c	AAGAAGG	CUUUCUU	194	200	9	15	-5.54
Jr02_17190_p1	JrWRKY14	Jre-miR396d	AAGAAGG	CUUUCUU	194	200	9	15	-5.54
Jr02_17190_p1	JrWRKY14	Jre-miR396e	AAGAAGG	CUUUCUU	194	200	9	15	-6.26
Jr02_17190_p1	JrWRKY14	Jre-miR396f	AAGAAGG	CUUUCUU	194	200	9	15	-6.26
Jr02_17190_p1	JrWRKY14	Jre-miR397a	UAAUCCUUAUUUUAAUGA	UCAUUGAGUGCAGCGUUG	4	21	1	18	-4.21
Jr02_17190_p1	JrWRKY14	Jre-miR398a	GUGAUCUGCGUGCA	UGUUCUCAGGUCAC	254	267	3	16	-6.47
Jr02_17190_p1	JrWRKY14	Jre-miR398b	GUGAUCUGCGUGCA	UGUUCUCAGGUCAC	254	267	3	16	-6.47
Jr02_17190_p1	JrWRKY14	Jre-miR398c	GUGAUCUGCGUGCA	UGUUCUCAGGUCGC	254	267	3	16	-4.59
Jr02_17190_p1	JrWRKY14	Jre-miR398d	GUGAUCUGCGUGCA	UGUUCUCAGGUCGC	254	267	3	16	-4.59
Jr02_17190_p1	JrWRKY14	Jre-miR398e	GUGAUCUGCGUGCA	UGUUCUCAGGUCGC	254	267	3	16	-4.59
Jr02_17190_p1	JrWRKY14	Jre-miR398f	GUGAUCUGCGUGCA	UGUUCUCAGGUCGC	254	267	3	16	-4.61
Jr02_17190_p1	JrWRKY14	Jre-miR399a	AUUCUUCACAAACGCA	UGCCAAAGGAGAAU	100	115	1	14	-2.98
Jr02_17190_p1	JrWRKY14	Jre-miR399b	AUUCUUCACAAACGCA	UGCCAAAGGAGAAU	100	115	1	14	-2.98
Jr02_17190_p1	JrWRKY14	Jre-miR399c	CAACUUUCUU	AGGAGAGUUG	78	87	7	16	-7.4
Jr02_17190_p1	JrWRKY14	Jre-miR399d	CAACUUUCUU	AGGAGAGUUG	78	87	7	16	-7.4
Jr02_17190_p1	JrWRKY14	Jre-miR399e	CAACUUUCUU	AGGAGAGUUG	78	87	7	16	-7.7
Jr02_17190_p1	JrWRKY14	Jre-miR399f	CAACUUUCUU	AGGAGAGUUG	78	87	7	16	-7.7
Jr02_17190_p1	JrWRKY14	Jre-miR477a	GUCUUUG	CAAAGGC	117	123	6	12	-2.79
Jr02_17190_p1	JrWRKY14	Jre-miR477b	GUCUUUG	CAAAGGC	117	123	6	12	-2.79
Jr02_17190_p1	JrWRKY14	Jre-miR477c	GUCUUUG	CAAAGGC	117	123	6	12	-2.79
Jr02_17190_p1	JrWRKY14	Jre-miR477d	GUCUUUG	CAAAGGC	117	123	6	12	-2.79
Jr02_17190_p1	JrWRKY14	Jre-miR477e	AAGAACGGAUGAGAGA	UCUCUCAAGGGCUUCUU	175	190	4	20	-9.1
Jr02_17190_p1	JrWRKY14	Jre-miR482c	GUAAUGUUUGGUUUA	UAGACCACCCAUUCC	46	60	6	20	-4.07
Jr02_17190_p1	JrWRKY14	Jre-miR482d	AAUGAUGGUGGAA	UUCCACCCAUU	17	29	8	18	-7.58
Jr02_17190_p1	JrWRKY14	Jre-miR530a	UGCGUGCAGAUGC	GCAUUUGCACCUGCA	260	272	2	16	-11.15
Jr02_17190_p1	JrWRKY14	Jre-miR530b	UGCGUGCAGAUGC	GCAUUUGCACCUGCA	260	272	2	16	-11.15
Jr02_17190_p1	JrWRKY14	Jre-miR530c	UGCGUGCAGAUGC	GCAUUUGCACCUGCA	260	272	2	16	-11.15
Jr02_17190_p1	JrWRKY14	Jre-miR530d	UGCGUGCAGAUGC	GCAUUUGCACCUGCA	260	272	2	16	-11.15
Jr02_17190_p1	JrWRKY14	Jre-miR5675a	AUUCUUCA	UGAGGGAU	100	107	13	20	-4.98
Jr02_17190_p1	JrWRKY14	Jre-miR7972a	AAUUACAAUUUCAAUCUGUGGCGA	UUGUCAGGGUUGUGAUU	209	232	1	17	-6.35
Jr02_17190_p1	JrWRKY14	Jre-miRN745a	AUCUGUGGCGAGAACU	GGUCGUUGCGAUUACGGGU	222	237	4	22	-4.45
Jr02_17190_p1	JrWRKY14	Jre-miRN745b	AUCUGUGGCGAGAACU	GGUCGUUGCGAUUACGGGU	222	237	4	22	-4.45
Jr02_17190_p1	JrWRKY14	Jre-miRN745c	AUCUGUGGCGAGAACU	GGUCGUUGCGAUUACGGGU	222	237	4	22	-4.45
Jr02_17190_p1	JrWRKY14	Jre-miRN5866	AAUGUUUGGUUUAAGUCGG	CCGAUUUAUACGAUUACAUU	48	66	2	21	-5.61
Jr02_17190_p1	JrWRKY14	Jre-miRN5867	AGAACGGAUGAGAGA	UCCUCGUUUUACUUCU	176	190	7	22	-5.73
Jr02_17190_p1	JrWRKY14	Jre-miRN5869	UGCGUGCAGAUGCCC	GGGCGUCUCUUCCUUUGCA	260	274	1	19	-10.01
Jr02_17190_p1	JrWRKY14	Jre-miRN5871	UGCAACAGCUUGAGUAU	AUAUUCGGAAGGCUUUGGCA	237	253	1	20	-2.47
Jr02_17190_p1	JrWRKY14	Jre-miRN5872	UUUGGUUUAAGUC	GACUGAACCGGA	52	64	8	19	-4.15
Jr02_17190_p1	JrWRKY14	Jre-miRN5873	AGUCGGA	UCUGGCU	61	67	16	22	-2.3
Jr02_17190_p1	JrWRKY14	Jre-miRN5874	UUCUUCACAAACG	CGUUUUGAGGGA	101	113	8	19	-7.25
Jr02_17190_p1	JrWRKY14	Jre-miRN5875	CUGCAACAGCUUGAGUAUGUG	CAUGUGCUCUUGCUCUCCAG	236	256	1	20	-7.46
Jr02_17190_p1	JrWRKY14	Jre-miRN5876	ACGGAUGAGAGA	UCUCUAUCUGU	179	190	8	18	-9.95
Jr02_17190_p1	JrWRKY14	Jre-miRN5877	UUUCUUGAUAUACCCU	AGGGAAAACUGAGGAG	82	97	3	18	-6.43
Jr02_17190_p1	JrWRKY14	Jre-miRN5878	UUUGGUUUAAGUCGG	UUGAUGUGAACCAAA	52	66	3	17	-4.25
Jr02_17190_p1	JrWRKY14	Jre-miRN5879	CUUUUAG	CUGAAAG	142	148	12	18	-2.09
Jr02_17190_p1	JrWRKY14	Jre-miRN5880	CGGAUGAGAGAAAAAAGAAGG	CCGUGUUUCUCUGUAUAAG	180	200	3	21	-6.08
Jr02_17190_p1	JrWRKY14	Jre-miRN5881	CUUUUAG	CUGAAAG	142	148	12	18	-2.09
Jr02_17190_p1	JrWRKY14	Jre-miRN5882	AGAGAAAAAAGAAGGAAA	UUUCCUUCAACACUUCUCU	186	203	4	22	-13.9
Jr02_17190_p1	JrWRKY14	Jre-miRN5883	CAGCUUGAGUAUGUGAUCUGCG	CGGGGGACUGCUCGAGCUG	242	263	1	19	-10.53
Jr02_17190_p1	JrWRKY14	Jre-miRN5884	GAUCGUUCA	UGAGCGGUU	66	74	2	10	-4.65
Jr02_17190_p1	JrWRKY14	Jre-miRN5885	GAUGGUGGA	UUCACCAUC	20	28	13	21	-8.42
Jr02_17190_p1	JrWRKY14	Jre-miRN5886	UUGUCCGAUGCCU	GGGCAAUUACACCUUGGGCAG	121	133	1	21	-7.44
Jr02_17190_p1	JrWRKY14	Jre-miRN5887	CGUGCAGAUG	CGUCUGUAUG	262	271	1	10	-7.66
Jr02_17190_p1	JrWRKY14	Jre-miRN5888	CCUACAUUCUUCAC	GUUGACGAUGUAGG	95	108	4	17	-9.14
Jr02_17190_p1	JrWRKY14	Jre-miRN5889	AUUCUUCACAAACGCACGU	AUGGCACAGUGAAGAAU	100	118	3	19	-10.9
Jr02_17190_p1	JrWRKY14	Jre-miRN5890	CUAAUCCUUA	UGAGGAUGAAUAG	3	12	3	15	-6.38
Jr02_17190_p1	JrWRKY14	Jre-miRN5891	AUGAUGGUGG	CUGCCAUGCAU	18	27	4	14	-3.17
Jr02_17190_p1	JrWRKY14	Jre-miRN5892	CUGCAACAGCUUGAGUAUGUG	CAUGUGCUCUAGCUCUCCAG	236	256	1	20	-8.62
Jr02_17190_p1	JrWRKY14	Jre-miRN5893	AGAACGGAUGAGAGAA	UUCUCUCAAAGGCUUCU	176	191	5	21	-10.2
Jr02_17190_p1	JrWRKY14	Jre-miRN5894	GAUGCCCCUU	GAGAGGGCAUC	268	277	11	21	-9.18
Jr02_17190_p1	JrWRKY14	Jre-miRN5895	CCCUACAUUCUUCACAAA	UUUGUUGGAGAAGCAGGG	94	111	2	19	-10.84
Jr02_17190_p1	JrWRKY14	Jre-miRN5896	CCCUACAUUCUUCACAAA	UUUGUUGGAGAAGCAGGG	94	111	2	19	-10.84
Jr02_17190_p1	JrWRKY14	Jre-miRN5897	CCCUACAUUCUUCACAAA	UUUGUUGGAGAAGCAGGG	94	111	2	19	-10.84
Jr02_17190_p1	JrWRKY14	Jre-miRN5898	CCCUACAUUCUUCACAAA	UUUGUUGGAGAAGCAGGG	94	111	2	19	-10.84
Jr02_17190_p1	JrWRKY14	Jre-miRN5899	CUACAUUCUUCACAAA	UUUGUGGGAUGAG	96	111	1	13	-5.65
Jr02_17190_p1	JrWRKY14	Jre-miRN5900	CUAAUCCUUAUUUUAAUGAUGGU	GCCAUCGUUCUGGGACAAG	3	25	2	20	-8.01
Jr02_17190_p1	JrWRKY14	Jre-miRN5901	UUUAGCCAAGUUGGA	UCCCCUCGGCUGAA	144	158	7	20	-6.05
Jr02_17190_p1	JrWRKY14	Jre-miRN5904	UAAAUUA	UAAUUUA	162	168	1	7	-2.41
Jr02_17190_p1	JrWRKY14	Jre-miRN5905	CAUUCUUCACAAACGCACGUCUU	GAGGCCUUGGGGGAGAGUG	99	121	2	20	-8.43
Jr02_17190_p1	JrWRKY14	Jre-miRN5906	AGCCAAG	CUUGGCU	147	153	11	17	-5.06
Jr02_17190_p1	JrWRKY14	Jre-miRN5907	UUAAUGAUGGUGGAAAUUAAG	CUUGACCACUUCAUUGG	15	35	5	21	-6.11
Jr02_17190_p1	JrWRKY14	Jre-miRN5908	CGGAUGAGAGA	UCUUUUAACUG	180	190	9	19	-6.54
Jr02_17190_p1	JrWRKY14	Jre-miRN5909	GUCGGAU	AUCUGAU	62	68	10	16	-3.1
Jr02_17190_p1	JrWRKY14	Jre-miRN5910	ACUUUCUUGAUAUAC	GUAUGUUGGGCUAUAGU	80	94	1	17	-5.41
Jr02_17190_p1	JrWRKY14	Jre-miRN5911	AGCUUGAGUAUGU	GCGUACUUGGGCU	243	255	9	21	-7.49
Jr02_25510_p1	JrWRKY15	Jre-miR156a	UGCUCGC	GUGAGCA	457	463	13	19	-9.01
Jr02_25510_p1	JrWRKY15	Jre-miR156b	UGUUCUUGAUAUCGACUG	CAGAAGAUAGAGAGCA	164	181	5	20	-9.83
Jr02_25510_p1	JrWRKY15	Jre-miR156c	UGUUCUUGAUAUCGACUG	CAGAAGAUAGAGAGCA	164	181	5	20	-9.83
Jr02_25510_p1	JrWRKY15	Jre-miR156d	UGUUCUUGAUAUCGACUG	CAGAAGAUAGAGAGCA	164	181	5	20	-9.83
Jr02_25510_p1	JrWRKY15	Jre-miR156e	UGUUCUUGAUAUCGACUG	CAGAAGAUAGAGAGCA	164	181	5	20	-9.83
Jr02_25510_p1	JrWRKY15	Jre-miR156f	GUCUUUCCAGAGUCUUUUAAAUGUCA	UGACAGAAGACAGAGAGC	411	436	2	19	-7.99
Jr02_25510_p1	JrWRKY15	Jre-miR156g	UGUUCUUGAUAUCGACUG	CAGAAGAGAGAGAGCA	164	181	5	20	-8.61
Jr02_25510_p1	JrWRKY15	Jre-miR156h	UGCUCGC	GUGAGCA	457	463	13	19	-9.01
Jr02_25510_p1	JrWRKY15	Jre-miR156i	UGCUCGC	GUGAGCA	457	463	13	19	-9.01
Jr02_25510_p1	JrWRKY15	Jre-miR156j	UGCUCGC	GUGAGCA	457	463	13	19	-9.01
Jr02_25510_p1	JrWRKY15	Jre-miR156k	UGCUCGC	GUGAGCA	457	463	13	19	-9.01
Jr02_25510_p1	JrWRKY15	Jre-miR156l	UGCUCGC	GUGAGCA	457	463	13	19	-9.01
Jr02_25510_p1	JrWRKY15	Jre-miR159a	CUCCCUUCAUUUC	GGAUUGAAGGGAG	73	85	4	16	-16.04
Jr02_25510_p1	JrWRKY15	Jre-miR159b	CUCCCUUCA	UGAAGGGAG	73	81	7	15	-12.29
Jr02_25510_p1	JrWRKY15	Jre-miR159c	CUCCCUUCA	UGAAGGGAG	73	81	7	15	-12.29
Jr02_25510_p1	JrWRKY15	Jre-miR159d	CUCCCUUCAUUUC	GGACUGAAGGGAG	73	85	4	16	-13.25
Jr02_25510_p1	JrWRKY15	Jre-miR159e	CUCCCUUCAUUUC	GGAUUGAAGGGAG	73	85	4	16	-15.57
Jr02_25510_p1	JrWRKY15	Jre-miR159f	CUCCCUUCAUUUC	GGAGUGAAGGGAG	73	85	4	16	-15.8
Jr02_25510_p1	JrWRKY15	Jre-miR159g	CUCCCUUCA	UGAAGGGAG	73	81	7	15	-12.29
Jr02_25510_p1	JrWRKY15	Jre-miR159h	CUCCCUUCA	UGAAGGGAG	73	81	7	15	-12.29
Jr02_25510_p1	JrWRKY15	Jre-miR159i	CUCCCUUCA	UGAAGGGAG	73	81	7	15	-12.29
Jr02_25510_p1	JrWRKY15	Jre-miR159j	CUCCCUUCA	UGAAGGGAG	73	81	7	15	-12.29
Jr02_25510_p1	JrWRKY15	Jre-miR159k	CUCCCUUCAUUUC	GGAUUGAAGGGAG	73	85	4	16	-15.57
Jr02_25510_p1	JrWRKY15	Jre-miR160a	UGGUAUUAUUAUCUGACAGG	CCUGGCUCCCUGAAUGCCA	274	293	3	21	-2.48
Jr02_25510_p1	JrWRKY15	Jre-miR160b	UGGUAUUAUUAUCUGACAGG	CCUGGCUCCCUGAAUGCCA	274	293	3	21	-2.48
Jr02_25510_p1	JrWRKY15	Jre-miR164a	UGUGCCCUGCU	AGCAGGGCACG	450	460	7	17	-14.86
Jr02_25510_p1	JrWRKY15	Jre-miR164b	UGUGCCCUGCU	AGCAGGGCACG	450	460	7	17	-14.86
Jr02_25510_p1	JrWRKY15	Jre-miR164c	UGUGCCCUGCU	AGCAGGGCACG	450	460	7	17	-14.86
Jr02_25510_p1	JrWRKY15	Jre-miR164d	UGUGCCCUGCU	AGCAGGGCACG	450	460	7	17	-14.86
Jr02_25510_p1	JrWRKY15	Jre-miR164e	UGUGCCCUGCU	AGCAGGGCACG	450	460	7	17	-14.86
Jr02_25510_p1	JrWRKY15	Jre-miR165a	GAAUUGAAGUCUUUCC	GGACCAGGCUUCAUUC	403	418	3	18	-10.34
Jr02_25510_p1	JrWRKY15	Jre-miR165b	GAAUUGAAGUCUUUCC	GGACCAGGCUUCAUUC	403	418	3	18	-10.34
Jr02_25510_p1	JrWRKY15	Jre-miR165c	GAAUUGAAGUCUUUCC	GGACCAGGCUUCAUUC	403	418	3	18	-10.34
Jr02_25510_p1	JrWRKY15	Jre-miR165d	GAAUUGAAGUCUUUCC	GGACCAGGCUUCAUUC	403	418	3	18	-10.34
Jr02_25510_p1	JrWRKY15	Jre-miR165e	GAAUUGAAGUCUUUCC	GGACCAGGCUUCAUUC	403	418	3	18	-10.34
Jr02_25510_p1	JrWRKY15	Jre-miR165f	GAAUUGAAGUCUUUCC	GGACCAGGCUUCAUUC	403	418	3	18	-10.34
Jr02_25510_p1	JrWRKY15	Jre-miR165g	GAAUUGAAGUCUUUCC	GGACCAGGCUUCAUUC	403	418	3	18	-10.34
Jr02_25510_p1	JrWRKY15	Jre-miR165h	GAAUUGAAGUCUUUCC	GGACCAGGCUUCAUUC	403	418	3	18	-10.34
Jr02_25510_p1	JrWRKY15	Jre-miR165i	GAAUUGAAGUCUUUCC	GGACCAGGCUUCAUUC	403	418	3	18	-10.34
Jr02_25510_p1	JrWRKY15	Jre-miR165j	GAAUUGAAGUCUUUCC	GGACCAGGCUUCAUUC	403	418	3	18	-10.34
Jr02_25510_p1	JrWRKY15	Jre-miR165k	GAAUUGAAGUCUUUCC	GGACCAGGCUUCAUUC	403	418	3	18	-10.34
Jr02_25510_p1	JrWRKY15	Jre-miR165l	GAAUUGAAGUCUUUCC	GGACCAGGCUUCAUUC	403	418	3	18	-10.34
Jr02_25510_p1	JrWRKY15	Jre-miR165m	GAAUUGAAGUCUUUCC	GGACCAGGCUUCAUUC	403	418	3	18	-10.42
Jr02_25510_p1	JrWRKY15	Jre-miR166a	GAAUUGAAGUCUUUCC	GGACCAGGCUUCAUUC	403	418	5	20	-10.84
Jr02_25510_p1	JrWRKY15	Jre-miR167a	UCAUUUCGGCGGUU	AGCUGCCAGCAUGA	79	92	4	17	-6.59
Jr02_25510_p1	JrWRKY15	Jre-miR167b	UCAUUUCGGCGGUU	AGCUGCCAGCAUGA	79	92	4	17	-6.59
Jr02_25510_p1	JrWRKY15	Jre-miR167c	UCAUUUCGGCGGUU	AGCUGCCAGCAUGA	79	92	4	17	-6.59
Jr02_25510_p1	JrWRKY15	Jre-miR167d	UCAUUUCGGCGGUU	AGCUGCCAGCAUGA	79	92	4	17	-6.58
Jr02_25510_p1	JrWRKY15	Jre-miR167e	UCAUUUCGGCGGUU	AGCUGCCAGCAUGA	79	92	4	17	-6.59
Jr02_25510_p1	JrWRKY15	Jre-miR167f	UCAUUUCGGCGGUU	AGCUGCCAGCAUGA	79	92	4	17	-6.58
Jr02_25510_p1	JrWRKY15	Jre-miR167g	UCAUUUCGGCGGUU	AGCUGCCAGCAUGA	79	92	4	17	-6.55
Jr02_25510_p1	JrWRKY15	Jre-miR167h	UCAUUUCGGCGGUU	AGCUGCCAGCAUGA	79	92	4	17	-6.55
Jr02_25510_p1	JrWRKY15	Jre-miR168a	CCUGCAAAUAUGCCUUACCAAGU	GCUUGGUGCAGGUCGGG	186	208	3	19	-12.1
Jr02_25510_p1	JrWRKY15	Jre-miR169a	AGGCAAGAGUCU	GGAUGACUUGCCU	103	114	8	20	-6.97
Jr02_25510_p1	JrWRKY15	Jre-miR169b	AGGCAAGAGUCU	GGAUGACUUGCCU	103	114	8	20	-6.97
Jr02_25510_p1	JrWRKY15	Jre-miR169c	AGGCAAGAGUCU	GGAUGACUUGCCU	103	114	8	20	-6.97
Jr02_25510_p1	JrWRKY15	Jre-miR169d	AGGCAAGAGUCU	GGAUGACUUGCCU	103	114	8	20	-6.97
Jr02_25510_p1	JrWRKY15	Jre-miR169e	AGGCAAGAGUCU	GGAUGACUUGCCU	103	114	8	20	-6.97
Jr02_25510_p1	JrWRKY15	Jre-miR169f	AGGCAAGAGUCU	GGAUGACUUGCCU	103	114	8	20	-6.97
Jr02_25510_p1	JrWRKY15	Jre-miR169g	AGGCAAGAGUCU	GGAUGACUUGCCU	103	114	8	20	-6.97
Jr02_25510_p1	JrWRKY15	Jre-miR169h	CGGCGGUUAAGGACAACAAGGC	GCCAAGGAUGAAUUGCCG	85	106	3	20	-5.99
Jr02_25510_p1	JrWRKY15	Jre-miR169i	UUAUCUUU	AAGGAUGA	353	360	6	13	-1.5
Jr02_25510_p1	JrWRKY15	Jre-miR169j	UUAUCUUU	AAGGAUGA	353	360	6	13	-1.5
Jr02_25510_p1	JrWRKY15	Jre-miR169k	UUAUCUUU	AAGGAUGA	353	360	6	13	-1.5
Jr02_25510_p1	JrWRKY15	Jre-miR170a	UCUGAGUG	CACUCAGA	155	162	14	21	-5.82
Jr02_25510_p1	JrWRKY15	Jre-miR170b	UCUGAGUG	CACUCAGA	155	162	14	21	-5.82
Jr02_25510_p1	JrWRKY15	Jre-miR170c	GAUAUUGGUG	CGCCAAUAUC	326	335	9	18	-11.08
Jr02_25510_p1	JrWRKY15	Jre-miR170d	AGAUAUUGGUG	CGUCAAUAUCU	325	335	9	19	-5.81
Jr02_25510_p1	JrWRKY15	Jre-miR170e	GAUAUUGGUG	CGCCAAUAUC	326	335	9	18	-11.08
Jr02_25510_p1	JrWRKY15	Jre-miR170f	AGAUAUUGGUG	CGUCAAUAUCU	325	335	9	19	-5.84
Jr02_25510_p1	JrWRKY15	Jre-miR170g	GAUAUUGGU	GCCAAUAUC	326	334	13	21	-6.2
Jr02_25510_p1	JrWRKY15	Jre-miR170h	GAUAUUGGU	GCCAAUAUC	326	334	13	21	-6.2
Jr02_25510_p1	JrWRKY15	Jre-miR170i	GAUAUUGGU	GCCAAUAUC	326	334	13	21	-6.2
Jr02_25510_p1	JrWRKY15	Jre-miR170j	GAUAUUGGU	GCCAAUAUC	326	334	13	21	-6.2
Jr02_25510_p1	JrWRKY15	Jre-miR170k	GAUAUUGGU	GCCAAUAUC	326	334	13	21	-6.2
Jr02_25510_p1	JrWRKY15	Jre-miR170l	GAUAUUGGU	GCCAAUAUC	326	334	13	21	-6.2
Jr02_25510_p1	JrWRKY15	Jre-miR170m	GAUAUUGGU	GCCAAUAUC	326	334	13	21	-6.2
Jr02_25510_p1	JrWRKY15	Jre-miR170n	GAUAUUGGU	ACCAAUAUC	326	334	9	17	-9.38
Jr02_25510_p1	JrWRKY15	Jre-miR170o	GAUAUUGGU	GCCAAUAUC	326	334	13	21	-6.21
Jr02_25510_p1	JrWRKY15	Jre-miR171a	GUAUCUGA	UUAGAUGC	152	159	1	8	-4.56
Jr02_25510_p1	JrWRKY15	Jre-miR172a	GGUAUUAUUA	UGAUGAUGCU	275	284	8	17	-4.66
Jr02_25510_p1	JrWRKY15	Jre-miR172b	UAAGAUUCC	GGAAUCUUG	126	134	1	9	-7.12
Jr02_25510_p1	JrWRKY15	Jre-miR172c	GGUAUUAUUA	UGAUGAUGCU	275	284	8	17	-4.66
Jr02_25510_p1	JrWRKY15	Jre-miR172d	GGUAUUAUUA	UGAUGAUGCU	275	284	8	17	-4.66
Jr02_25510_p1	JrWRKY15	Jre-miR172e	UAAGAUUCC	GGAAUCUUG	126	134	1	9	-7.12
Jr02_25510_p1	JrWRKY15	Jre-miR172f	GGUAUUAUUA	UGAUGAUGCU	275	284	8	17	-4.66
Jr02_25510_p1	JrWRKY15	Jre-miR2111a	ACUUUAG	CUGAGGU	146	152	12	18	-1.65
Jr02_25510_p1	JrWRKY15	Jre-miR2111b	ACUUUAG	CUGAGGU	146	152	12	18	-1.65
Jr02_25510_p1	JrWRKY15	Jre-miR390a	CUUUCCCUCC	GGAGGGAUAG	67	76	8	17	-13.49
Jr02_25510_p1	JrWRKY15	Jre-miR390b	CUUUCCCUCC	GGAGGGAUAG	67	76	8	17	-13.49
Jr02_25510_p1	JrWRKY15	Jre-miR390c	CUUUCCCUCC	GGAGGGAUAG	67	76	8	17	-13.47
Jr02_25510_p1	JrWRKY15	Jre-miR393a	GAUUCCUUU	AAAGGGAUC	129	137	4	12	-6.26
Jr02_25510_p1	JrWRKY15	Jre-miR393b	GAUUCCUUU	AAAGGGAUC	129	137	4	12	-6.26
Jr02_25510_p1	JrWRKY15	Jre-miR393c	GAUUCCUUU	AAAGGGAUC	129	137	4	12	-4.64
Jr02_25510_p1	JrWRKY15	Jre-miR394a	GACAGGA	UUCUGUC	288	294	7	13	-3.65
Jr02_25510_p1	JrWRKY15	Jre-miR394b	GACAGGA	UUCUGUC	288	294	7	13	-3.65
Jr02_25510_p1	JrWRKY15	Jre-miR394c	GACAGGA	UUCUGUC	288	294	7	13	-3.65
Jr02_25510_p1	JrWRKY15	Jre-miR394d	GACAGGA	UUCUGUC	288	294	7	13	-3.65
Jr02_25510_p1	JrWRKY15	Jre-miR395a	UUCCCUCCCUUCAUUUCGG	CUGAAGUGUUUGGGGGAA	69	87	1	18	-14.37
Jr02_25510_p1	JrWRKY15	Jre-miR395b	UUCCCUCCCUUCAUUUCGG	CUGAAGUGUUUGGGGGAA	69	87	1	18	-14.37
Jr02_25510_p1	JrWRKY15	Jre-miR395c	UUCCCUCCCUUCAUUUCGG	CUGAAGUGUUUGGGGGAA	69	87	1	18	-14.37
Jr02_25510_p1	JrWRKY15	Jre-miR395d	UUCCCUCCCUUCAUUUCGG	CUGAAGUGUUUGGGGGAA	69	87	1	18	-14.37
Jr02_25510_p1	JrWRKY15	Jre-miR395e	UUCCCUCCCUUCAUUUCGG	CUGAAGUGUUUGGGGGAA	69	87	1	18	-14.37
Jr02_25510_p1	JrWRKY15	Jre-miR395f	UUCCCUCCCUUCAUUUCGG	CUGAAGUGUUUGGGGGAA	69	87	1	18	-14.37
Jr02_25510_p1	JrWRKY15	Jre-miR395g	UUCCCUCCCUUCAUUUCGG	CUGAAGUGUUUGGGGGAA	69	87	1	18	-14.37
Jr02_25510_p1	JrWRKY15	Jre-miR395h	UUCCCUCCCUUCAUUUCGG	CUGAAGUGUUUGGGGGAA	69	87	1	18	-14.37
Jr02_25510_p1	JrWRKY15	Jre-miR395i	UUCCCUCCCUUCAUUUCGG	CUGAAGUGUUUGGGGGAA	69	87	1	18	-14.37
Jr02_25510_p1	JrWRKY15	Jre-miR395j	UUCCCUCCCUUCAUUUCGG	CUGAAGUGUUUGGGGGAA	69	87	1	18	-14.37
Jr02_25510_p1	JrWRKY15	Jre-miR396a	UUUAAGACUG	CAGCUUUCUUGAA	266	275	6	18	-3.85
Jr02_25510_p1	JrWRKY15	Jre-miR396b	UUUAAGACUG	CAGCUUUCUUGAA	266	275	6	18	-3.21
Jr02_25510_p1	JrWRKY15	Jre-miR396c	UUUAAGACUG	CAGCUUUCUUGAA	266	275	6	18	-3.21
Jr02_25510_p1	JrWRKY15	Jre-miR396d	UUUAAGACUG	CAGCUUUCUUGAA	266	275	6	18	-3.21
Jr02_25510_p1	JrWRKY15	Jre-miR396e	UUUAAGACUG	CAGCUUUCUUGAA	266	275	6	18	-3.82
Jr02_25510_p1	JrWRKY15	Jre-miR396f	UUUAAGACUG	CAGCUUUCUUGAA	266	275	6	18	-3.82
Jr02_25510_p1	JrWRKY15	Jre-miR397a	UAUCGACUGCCUC	GAGUGCAGCGUUGAUG	173	185	6	21	-7.84
Jr02_25510_p1	JrWRKY15	Jre-miR398a	UGACUUCUUUGAGAAUAC	GUGUUCUCAGGUCA	230	247	2	15	-10.16
Jr02_25510_p1	JrWRKY15	Jre-miR398b	UGACUUCUUUGAGAAUAC	GUGUUCUCAGGUCA	230	247	2	15	-10.16
Jr02_25510_p1	JrWRKY15	Jre-miR398c	UGACUUCUUUGAGAAUAC	GUGUUCUCAGGUCG	230	247	2	15	-7.98
Jr02_25510_p1	JrWRKY15	Jre-miR398d	UGACUUCUUUGAGAAUAC	GUGUUCUCAGGUCG	230	247	2	15	-7.98
Jr02_25510_p1	JrWRKY15	Jre-miR398e	UGACUUCUUUGAGAAUAC	GUGUUCUCAGGUCG	230	247	2	15	-7.98
Jr02_25510_p1	JrWRKY15	Jre-miR398f	GACUUCUUUGAGAAU	GUUCUCAGGUC	231	245	4	14	-4.96
Jr02_25510_p1	JrWRKY15	Jre-miR399a	CUUCUUUG	CAAAGGAG	233	240	4	11	-4.79
Jr02_25510_p1	JrWRKY15	Jre-miR399b	CUUCUUUG	CAAAGGAG	233	240	4	11	-4.79
Jr02_25510_p1	JrWRKY15	Jre-miR399c	CAACUUUCCCUCCCUUCAUUUCGGCG	CGCCAAAGGAGAGUUG	64	89	1	16	-9.84
Jr02_25510_p1	JrWRKY15	Jre-miR399d	CAACUUUCCCUCCCUUCAUUUCGGCG	CGCCAAAGGAGAGUUG	64	89	1	16	-9.84
Jr02_25510_p1	JrWRKY15	Jre-miR399e	CAACUUUCC	GGAGAGUUG	64	72	8	16	-9.71
Jr02_25510_p1	JrWRKY15	Jre-miR399f	CAACUUUCC	GGAGAGUUG	64	72	8	16	-9.71
Jr02_25510_p1	JrWRKY15	Jre-miR403a	UUUGUGC	GCACAAA	448	454	11	17	-6.47
Jr02_25510_p1	JrWRKY15	Jre-miR403b	UUUGUGC	GCACAAA	448	454	11	17	-6.47
Jr02_25510_p1	JrWRKY15	Jre-miR477a	AUGUUGACUUCUUUGAG	CUCAAAGGCUUCCAGCAU	226	242	4	21	-8.33
Jr02_25510_p1	JrWRKY15	Jre-miR477b	AUGUUGACUUCUUUGAG	CUCAAAGGCUUCCAGCAU	226	242	4	21	-8.33
Jr02_25510_p1	JrWRKY15	Jre-miR477c	AUGUUGACUUCUUUGAG	CUCAAAGGCUUCCAGCAU	226	242	4	21	-8.33
Jr02_25510_p1	JrWRKY15	Jre-miR477d	AUGUUGACUUCUUUGAG	CUCAAAGGCUUCCAGCAU	226	242	4	21	-8.33
Jr02_25510_p1	JrWRKY15	Jre-miR477e	GAAGUCUUUCCAGAG	CUCUCAAGGGCUUC	408	422	5	18	-8.06
Jr02_25510_p1	JrWRKY15	Jre-miR482a	GGCGGUUAAGG	CCAAAGCCGCC	86	96	4	14	-9.96
Jr02_25510_p1	JrWRKY15	Jre-miR482b	GGCGGUUAAGG	CCAAAGCCGCC	86	96	4	14	-9.87
Jr02_25510_p1	JrWRKY15	Jre-miR482d	UGGAAUUG	CAAUUCCA	365	372	5	12	-5.71
Jr02_25510_p1	JrWRKY15	Jre-miR530a	UGCAAAU	AUUUGCA	188	194	4	10	-2.87
Jr02_25510_p1	JrWRKY15	Jre-miR530b	UGCAAAU	AUUUGCA	188	194	4	10	-2.87
Jr02_25510_p1	JrWRKY15	Jre-miR530c	UGCAAAU	AUUUGCA	188	194	4	10	-2.87
Jr02_25510_p1	JrWRKY15	Jre-miR530d	UGCAAAU	AUUUGCA	188	194	4	10	-2.87
Jr02_25510_p1	JrWRKY15	Jre-miR5675a	GUCUUUCCAGAGUCU	GGAUUCUGAGGGAU	411	425	7	20	-11.38
Jr02_25510_p1	JrWRKY15	Jre-miR7972a	GAGAAUUCACCUUUGUGCCCUGC	GUCAGGGUUGUGAUUCUC	437	459	3	20	-9.04
Jr02_25510_p1	JrWRKY15	Jre-miR8175a	UGAGUGCUGUUCU	GGCAACGGCGCCA	157	169	8	20	-3.46
Jr02_25510_p1	JrWRKY15	Jre-miRN745a	UUGUAACGA	UCGUUGCGA	396	404	6	14	-5.5
Jr02_25510_p1	JrWRKY15	Jre-miRN745b	UUGUAACGA	UCGUUGCGA	396	404	6	14	-5.5
Jr02_25510_p1	JrWRKY15	Jre-miRN745c	UUGUAACGA	UCGUUGCGA	396	404	6	14	-5.5
Jr02_25510_p1	JrWRKY15	Jre-miRN5866	UGUAUAAAU	AUUUAUACG	250	258	5	13	-4.9
Jr02_25510_p1	JrWRKY15	Jre-miRN5867	AAGGCAAGAGUCUCUA	UAGAGAUCCUCGUUUU	102	117	1	16	-6.18
Jr02_25510_p1	JrWRKY15	Jre-miRN5868	UAGAGGA	UCCUCUG	116	122	3	9	-5.83
Jr02_25510_p1	JrWRKY15	Jre-miRN5869	CUUGUAACGAAUUGAAGUCU	GGGCGUCUCUUCCUUUGCAAG	395	414	1	21	-6.82
Jr02_25510_p1	JrWRKY15	Jre-miRN5871	CCAGAGUCUUUUAAAUGU	AUAUUCGGAAGGCUUUGG	417	434	1	18	-12.72
Jr02_25510_p1	JrWRKY15	Jre-miRN5872	CUCAAAAGUACUUGUAAG	UUUGCAAGACUGAACCGGAG	309	326	1	20	-8.3
Jr02_25510_p1	JrWRKY15	Jre-miRN5873	GUCAGAGA	UCUCUGGC	433	440	14	21	-8.33
Jr02_25510_p1	JrWRKY15	Jre-miRN5874	UCCCUCCCUUCAUUUCGGC	GCUGGAACGUUUUGAGGGA	70	88	1	19	-14.68
Jr02_25510_p1	JrWRKY15	Jre-miRN5875	GGCAAGAGU	GCUCUUGCU	104	112	6	14	-8.4
Jr02_25510_p1	JrWRKY15	Jre-miRN5876	UGACAGGAAGA	UCUAUCUGUCA	287	297	10	20	-7.5
Jr02_25510_p1	JrWRKY15	Jre-miRN5877	UUUUUCAACUUUCCCU	AGGGAAAACUGAGGAG	59	74	3	18	-13.15
Jr02_25510_p1	JrWRKY15	Jre-miRN5878	GCUGUUCUUGAUAUCGA	UUGAUGUGAACCAAAGC	162	178	3	19	-5.48
Jr02_25510_p1	JrWRKY15	Jre-miRN5879	GUUUUCAAUGAAAAGAGAAC	GUUCUGAAUCUGAAAGC	5	24	3	19	-4.25
Jr02_25510_p1	JrWRKY15	Jre-miRN5880	UGUCAGAGAAUUCAC	GUGUUUCUCUGUAUA	432	446	5	19	-8.39
Jr02_25510_p1	JrWRKY15	Jre-miRN5881	GUUUUCAAUGAAAAGAGAAC	GUUCUGAAUCUGAAAGC	5	24	3	19	-4.25
Jr02_25510_p1	JrWRKY15	Jre-miRN5883	GGCAAGAGUCUCU	GGGGACUGCUCGAGCU	104	116	3	18	-3.63
Jr02_25510_p1	JrWRKY15	Jre-miRN5884	GUGCCCUGCUCG	UGAGCGGUUACCUGAGCAC	451	462	2	20	-5.86
Jr02_25510_p1	JrWRKY15	Jre-miRN5885	UGGUGAGAGAU	GUCUUCACCA	331	341	10	19	-4.55
Jr02_25510_p1	JrWRKY15	Jre-miRN5886	ACUGCCUCCCUGCAAAUAUGCCU	GGGCAAUUACACCUUGGGCAGU	178	200	1	22	-11.43
Jr02_25510_p1	JrWRKY15	Jre-miRN5887	GUAUAAAUAUGAAUUUUUAAGAC	GUCUGUAUGAUUUUUAUGC	251	273	2	20	-3.57
Jr02_25510_p1	JrWRKY15	Jre-miRN5888	UCAAUUAUUUUUCAACUU	AGGUUGACGAUGUAGGA	52	69	2	18	-5.41
Jr02_25510_p1	JrWRKY15	Jre-miRN5889	AUUCACCUUUGUGCC	GGCACAGUGAAGAAU	441	455	5	19	-9.47
Jr02_25510_p1	JrWRKY15	Jre-miRN5890	UUUAUCUUU	GAGGAUGAA	352	360	4	12	-5.39
Jr02_25510_p1	JrWRKY15	Jre-miRN5891	GGCGGUUA	UGGCUGCC	86	93	1	8	-4.63
Jr02_25510_p1	JrWRKY15	Jre-miRN5893	GAAGUCUUUCCAGAG	CUCUCAAAGGCUUC	408	422	7	20	-9.35
Jr02_25510_p1	JrWRKY15	Jre-miRN5894	GUGCCCUGCUCGCAUGAUUA	UGAUUAUAGAGAGGGCAU	451	470	3	20	-14.89
Jr02_25510_p1	JrWRKY15	Jre-miRN5895	CCCUGCU	AGCAGGG	454	460	13	19	-8.93
Jr02_25510_p1	JrWRKY15	Jre-miRN5896	CCCUGCU	AGCAGGG	454	460	13	19	-8.93
Jr02_25510_p1	JrWRKY15	Jre-miRN5897	CCCUGCU	AGCAGGG	454	460	13	19	-8.93
Jr02_25510_p1	JrWRKY15	Jre-miRN5898	CCCUGCU	AGCAGGG	454	460	13	19	-8.93
Jr02_25510_p1	JrWRKY15	Jre-miRN5899	GAAGUCUUUCCAGAGUCUUUUAAA	UUUGUGGGAUGAGAAGACUUC	408	431	1	21	-9.06
Jr02_25510_p1	JrWRKY15	Jre-miRN5900	UCUUUCCAGAG	UUCUGGGACAAGA	412	422	9	21	-5.05
Jr02_25510_p1	JrWRKY15	Jre-miRN5901	UUUCGGCGGUUAAGGA	UCCCCUCGGCUGAAG	82	97	7	21	-4.76
Jr02_25510_p1	JrWRKY15	Jre-miRN5902	UCGGCGGUUAAGGAC	GUCCCGAACCCGUCGG	84	98	4	19	-8.13
Jr02_25510_p1	JrWRKY15	Jre-miRN5903	UCGGCGGUUAAGGAC	GUCCCGAACCCGUCGG	84	98	4	19	-8.13
Jr02_25510_p1	JrWRKY15	Jre-miRN5904	GCUCGCAUGAU	AUCGUGUGGC	458	468	10	19	-9.27
Jr02_25510_p1	JrWRKY15	Jre-miRN5905	ACUUUCCCUCCCUU	GAGGCCUUGGGGGAGAGU	66	79	2	19	-15.8
Jr02_25510_p1	JrWRKY15	Jre-miRN5906	CGGCGGUUAAGGACAACA	UGUUAUCCUUGGCUCACG	85	102	4	21	-7.77
Jr02_25510_p1	JrWRKY15	Jre-miRN5907	GGCGGUUAAGG	CCUUGACCACU	86	96	4	14	-6.97
Jr02_25510_p1	JrWRKY15	Jre-miRN5908	GCCCUGCUCGCAUGAUUAUGA	UCAUGAUCUUUUAACUGGC	453	473	3	21	-7.38
Jr02_25510_p1	JrWRKY15	Jre-miRN5909	GAUUAUG	UAUAAUC	466	472	6	12	-2.79
Jr02_25510_p1	JrWRKY15	Jre-miRN5910	GACUGCCUCCCUGCAAAUAUGC	GUAUGUUGGGCUAUAGUAGUC	177	198	1	21	-8.36
Jr02_25510_p1	JrWRKY15	Jre-miRN5911	AGUCCAAUAC	GUACUUGGGCU	206	215	11	21	-5.77
Jr02_25510_p1	JrWRKY15	Jre-miRN5912	GUUAAGGA	UCCUUGGC	90	97	7	14	-4.88
Jr02_26760_p1	JrWRKY17	Jre-miR156a	CUUCUGUU	GACAGAAG	2	9	2	9	-8.44
Jr02_26760_p1	JrWRKY17	Jre-miR156b	UGUUUUCUGUUUUCU	AGAAGAUAGAGAGCA	6	20	6	20	-11.84
Jr02_26760_p1	JrWRKY17	Jre-miR156c	UGUUUUCUGUUUUCU	AGAAGAUAGAGAGCA	6	20	6	20	-11.84
Jr02_26760_p1	JrWRKY17	Jre-miR156d	UGUUUUCUGUUUUCU	AGAAGAUAGAGAGCA	6	20	6	20	-11.84
Jr02_26760_p1	JrWRKY17	Jre-miR156e	UGUUUUCUGUUUUCU	AGAAGAUAGAGAGCA	6	20	6	20	-11.84
Jr02_26760_p1	JrWRKY17	Jre-miR156f	UGUUUUCUGUUUUCU	AGAAGACAGAGAGCA	6	20	6	20	-13.62
Jr02_26760_p1	JrWRKY17	Jre-miR156g	UGUUUUCUGUUUUCU	AGAAGAGAGAGAGCA	6	20	6	20	-10.12
Jr02_26760_p1	JrWRKY17	Jre-miR156h	CUUCUGUU	GACAGAAG	2	9	2	9	-8.44
Jr02_26760_p1	JrWRKY17	Jre-miR156i	CUUCUGUU	GACAGAAG	2	9	2	9	-8.44
Jr02_26760_p1	JrWRKY17	Jre-miR156j	CUUCUGUU	GACAGAAG	2	9	2	9	-8.44
Jr02_26760_p1	JrWRKY17	Jre-miR156k	CUUCUGUU	GACAGAAG	2	9	2	9	-8.44
Jr02_26760_p1	JrWRKY17	Jre-miR156l	CUUCUGUU	GACAGAAG	2	9	2	9	-8.44
Jr02_26760_p1	JrWRKY17	Jre-miR159a	GUUUUCUUU	GAAGGGAGC	14	22	9	17	-4.68
Jr02_26760_p1	JrWRKY17	Jre-miR159b	GUUUUCUUU	GAAGGGAGC	14	22	8	16	-2.08
Jr02_26760_p1	JrWRKY17	Jre-miR159c	GUUUUCUUU	GAAGGGAGC	14	22	8	16	-2.08
Jr02_26760_p1	JrWRKY17	Jre-miR159d	GUUUUCUUU	GAAGGGAGC	14	22	9	17	-2.76
Jr02_26760_p1	JrWRKY17	Jre-miR159e	GUUUUCUUU	GAAGGGAGC	14	22	9	17	-4.35
Jr02_26760_p1	JrWRKY17	Jre-miR159f	GUUUUCUUU	GAAGGGAGC	14	22	9	17	-1.3
Jr02_26760_p1	JrWRKY17	Jre-miR159g	GUUUUCUUU	GAAGGGAGC	14	22	8	16	-2.08
Jr02_26760_p1	JrWRKY17	Jre-miR159h	GUUUUCUUU	GAAGGGAGC	14	22	8	16	-2.08
Jr02_26760_p1	JrWRKY17	Jre-miR159i	GUUUUCUUU	GAAGGGAGC	14	22	8	16	-2.08
Jr02_26760_p1	JrWRKY17	Jre-miR159j	GUUUUCUUU	GAAGGGAGC	14	22	8	16	-2.08
Jr02_26760_p1	JrWRKY17	Jre-miR159k	GUUUUCUUU	GAAGGGAGC	14	22	9	17	-4.35
Jr02_26760_p1	JrWRKY17	Jre-miR160a	GGUAUUUUAUUUAGUGA	UGGCUCCCUGAAUGCC	71	87	5	20	-1.75
Jr02_26760_p1	JrWRKY17	Jre-miR160b	GGUAUUUUAUUUAGUGA	UGGCUCCCUGAAUGCC	71	87	5	20	-1.75
Jr02_26760_p1	JrWRKY17	Jre-miR160c	AUAUGGG	CCUGUAU	66	72	11	17	-1.76
Jr02_26760_p1	JrWRKY17	Jre-miR160d	AUAUGGG	CCUGUAU	66	72	11	17	-1.76
Jr02_26760_p1	JrWRKY17	Jre-miR160e	AUAUGGG	CCUGUAU	66	72	11	17	-1.76
Jr02_26760_p1	JrWRKY17	Jre-miR160f	AUAUGGG	CCUGUAU	66	72	11	17	-1.76
Jr02_26760_p1	JrWRKY17	Jre-miR164a	CUGUUUU	GAAGCAG	5	11	5	11	-3.13
Jr02_26760_p1	JrWRKY17	Jre-miR164b	CUGUUUU	GAAGCAG	5	11	5	11	-3.13
Jr02_26760_p1	JrWRKY17	Jre-miR164c	CUGUUUU	GAAGCAG	5	11	5	11	-3.13
Jr02_26760_p1	JrWRKY17	Jre-miR164d	CUGUUUU	GAAGCAG	5	11	5	11	-3.13
Jr02_26760_p1	JrWRKY17	Jre-miR164e	CUGUUUU	GAAGCAG	5	11	5	11	-3.13
Jr02_26760_p1	JrWRKY17	Jre-miR169h	GGUAUUUUAUUU	GGAUGAAUUGCC	71	82	8	19	-5.57
Jr02_26760_p1	JrWRKY17	Jre-miR169i	GUUUUCUUUGG	CCAAGGAUGAC	14	24	4	14	-2
Jr02_26760_p1	JrWRKY17	Jre-miR169j	GUUUUCUUUGG	CCAAGGAUGAC	14	24	4	14	-2
Jr02_26760_p1	JrWRKY17	Jre-miR169k	GUUUUCUUUGG	CCAAGGAUGAC	14	24	4	14	-2
Jr02_26760_p1	JrWRKY17	Jre-miR171a	AUGGGUAUUU	AGAUGCCCAU	68	77	3	12	-8.45
Jr02_26760_p1	JrWRKY17	Jre-miR390a	GUGUACCUUUCU	AGGAGGGAUAGCGC	38	49	7	20	-5.41
Jr02_26760_p1	JrWRKY17	Jre-miR390b	GUGUACCUUUCU	AGGAGGGAUAGCGC	38	49	7	20	-5.41
Jr02_26760_p1	JrWRKY17	Jre-miR390c	GUGUACCUUUCU	AGGAGGGAUAGCAC	38	49	7	20	-5.87
Jr02_26760_p1	JrWRKY17	Jre-miR393a	UGUUUUCUUUGGG	UCCAAAGGGAUCGCA	13	25	1	15	-2.6
Jr02_26760_p1	JrWRKY17	Jre-miR393b	UGUUUUCUUUGGG	UCCAAAGGGAUCGCA	13	25	1	15	-2.6
Jr02_26760_p1	JrWRKY17	Jre-miR393c	CUUUGGG	UCCAAAG	19	25	1	7	-1.8
Jr02_26760_p1	JrWRKY17	Jre-miR395a	GUUUUCUGUUUUCUUUGG	CUGAAGUGUUUGGGGGAAC	7	24	1	19	-2.59
Jr02_26760_p1	JrWRKY17	Jre-miR395b	GUUUUCUGUUUUCUUUGG	CUGAAGUGUUUGGGGGAAC	7	24	1	19	-2.59
Jr02_26760_p1	JrWRKY17	Jre-miR395c	GUUUUCUGUUUUCUUUGG	CUGAAGUGUUUGGGGGAAC	7	24	1	19	-2.59
Jr02_26760_p1	JrWRKY17	Jre-miR395d	GUUUUCUGUUUUCUUUGG	CUGAAGUGUUUGGGGGAAC	7	24	1	19	-2.59
Jr02_26760_p1	JrWRKY17	Jre-miR395e	GUUUUCUGUUUUCUUUGG	CUGAAGUGUUUGGGGGAAC	7	24	1	19	-2.59
Jr02_26760_p1	JrWRKY17	Jre-miR395f	GUUUUCUGUUUUCUUUGG	CUGAAGUGUUUGGGGGAAC	7	24	1	19	-2.59
Jr02_26760_p1	JrWRKY17	Jre-miR395g	GUUUUCUGUUUUCUUUGG	CUGAAGUGUUUGGGGGAAC	7	24	1	19	-2.59
Jr02_26760_p1	JrWRKY17	Jre-miR395h	GUUUUCUGUUUUCUUUGG	CUGAAGUGUUUGGGGGAAC	7	24	1	19	-2.59
Jr02_26760_p1	JrWRKY17	Jre-miR395i	GUUUUCUGUUUUCUUUGG	CUGAAGUGUUUGGGGGAAC	7	24	1	19	-2.59
Jr02_26760_p1	JrWRKY17	Jre-miR395j	GUUUUCUGUUUUCUUUGG	CUGAAGUGUUUGGGGGAAC	7	24	1	19	-2.59
Jr02_26760_p1	JrWRKY17	Jre-miR397a	UAUUUAGUGA	UCAUUGAGUG	78	87	1	10	-5.6
Jr02_26760_p1	JrWRKY17	Jre-miR399a	UUUUCUUUGGGA	UGCCAAAGGAGA	15	26	1	12	-3.42
Jr02_26760_p1	JrWRKY17	Jre-miR399b	UUUUCUUUGGGA	UGCCAAAGGAGA	15	26	1	12	-3.42
Jr02_26760_p1	JrWRKY17	Jre-miR399c	UUUUCUUUGG	CCAAAGGAGA	15	24	3	12	-3.01
Jr02_26760_p1	JrWRKY17	Jre-miR399d	UUUUCUUUGG	CCAAAGGAGA	15	24	3	12	-3.01
Jr02_26760_p1	JrWRKY17	Jre-miR399e	UUUUCUUUGGGA	UGCCAAAGGAGA	15	26	1	12	-3.42
Jr02_26760_p1	JrWRKY17	Jre-miR399f	UUUUCUUUGGGA	UGCCAAAGGAGA	15	26	1	12	-3.42
Jr02_26760_p1	JrWRKY17	Jre-miR472a	UGGGAAA	UUUCCUA	22	28	3	9	-0.91
Jr02_26760_p1	JrWRKY17	Jre-miR472b	UUGGGAAA	UUUCCUAG	21	28	3	10	-1.23
Jr02_26760_p1	JrWRKY17	Jre-miR477a	CUGUUUUCUUUGGG	CUCAAAGGCUUCCAG	12	25	4	18	-1.89
Jr02_26760_p1	JrWRKY17	Jre-miR477b	CUGUUUUCUUUGGG	CUCAAAGGCUUCCAG	12	25	4	18	-1.89
Jr02_26760_p1	JrWRKY17	Jre-miR477c	CUGUUUUCUUUGGG	CUCAAAGGCUUCCAG	12	25	4	18	-1.89
Jr02_26760_p1	JrWRKY17	Jre-miR477d	CUGUUUUCUUUGGG	CUCAAAGGCUUCCAG	12	25	4	18	-1.89
Jr02_26760_p1	JrWRKY17	Jre-miR477e	UCUUUGGGA	UCUCAAGGG	18	26	6	14	-2.22
Jr02_26760_p1	JrWRKY17	Jre-miR482a	CUUUGGGAA	UUCCCAAAG	19	27	1	9	-6.44
Jr02_26760_p1	JrWRKY17	Jre-miR482b	CUUUGGGAA	UUCCCAAAG	19	27	1	9	-6.43
Jr02_26760_p1	JrWRKY17	Jre-miR482c	UUUGGGAAA	UUUCCUAGA	20	28	1	9	-2.37
Jr02_26760_p1	JrWRKY17	Jre-miRN5866	AAAUGUG	UACAUUU	34	40	16	22	-0.65
Jr02_26760_p1	JrWRKY17	Jre-miRN5868	UAUUUAGUG	CUCUGAAUA	78	86	5	13	-3.82
Jr02_26760_p1	JrWRKY17	Jre-miRN5870	UUUGGGAAA	UUUCCCGAA	20	28	1	9	-4.21
Jr02_26760_p1	JrWRKY17	Jre-miRN5871	CUUCUGUUUUCUG	CGGAAGGCUUUGG	2	14	6	18	-2.7
Jr02_26760_p1	JrWRKY17	Jre-miRN5872	UUCUUUGG	CCGGAGGA	17	24	15	22	-2.13
Jr02_26760_p1	JrWRKY17	Jre-miRN5874	GAAAUGU	ACGUUUU	33	39	7	13	-0.1
Jr02_26760_p1	JrWRKY17	Jre-miRN5876	AUGGGUAUUUUAUUUAGU	GCUUACUCUCUAUCUGU	68	85	2	18	-0.39
Jr02_26760_p1	JrWRKY17	Jre-miRN5877	CUUCUGUUUUCU	GGAAAACUGAGG	2	13	5	16	-8.07
Jr02_26760_p1	JrWRKY17	Jre-miRN5880	UUAUAUAAUAGACAU	GUGUUUCUCUGUAUAA	51	65	5	20	-3.13
Jr02_26760_p1	JrWRKY17	Jre-miRN5885	AUGGGUAU	GUGCCCGU	68	75	4	11	-6.28
Jr02_26760_p1	JrWRKY17	Jre-miRN5889	CUGUUUU	AGAAUAG	5	11	15	21	-1.9
Jr02_26760_p1	JrWRKY17	Jre-miRN5890	UGUUUUCUGUUUUCUUUGGG	UCUGAGGAUGAAUAGAAAAUA	6	25	1	21	-9.51
Jr02_26760_p1	JrWRKY17	Jre-miRN5893	UCUUUGGGA	UCUCAAAGG	18	26	8	16	-3.52
Jr02_26760_p1	JrWRKY17	Jre-miRN5894	GUGUACCUUUCUAU	AUAGAGAGGGCAU	38	51	8	20	-8.6
Jr02_26760_p1	JrWRKY17	Jre-miRN5895	CUUCUGUUUU	GAAGCAGGGG	2	11	11	20	-5.83
Jr02_26760_p1	JrWRKY17	Jre-miRN5896	CUUCUGUUUU	GAAGCAGGGG	2	11	11	20	-5.83
Jr02_26760_p1	JrWRKY17	Jre-miRN5897	CUUCUGUUUU	GAAGCAGGGG	2	11	11	20	-5.83
Jr02_26760_p1	JrWRKY17	Jre-miRN5898	CUUCUGUUUU	GAAGCAGGGG	2	11	11	20	-5.83
Jr02_26760_p1	JrWRKY17	Jre-miRN5899	GUUUUCUU	GAGAAGAC	14	21	11	18	-4.74
Jr02_26760_p1	JrWRKY17	Jre-miRN5904	UAUAUGGGUAUUUUAUU	AAUUUAAUAUCGUGUG	65	81	2	17	-1.63
Jr02_26760_p1	JrWRKY17	Jre-miRN5905	UUUUCUU	GGGAGAG	15	21	12	18	-0.17
Jr02_26760_p1	JrWRKY17	Jre-miRN5907	UUAGUGA	UCAUUGG	81	87	15	21	-1.54
Jr02_26760_p1	JrWRKY17	Jre-miRN5909	UCUAUUAUAUAAU	AUUAUAUAAUCUGA	47	59	2	15	-4.11
Jr02_26760_p1	JrWRKY17	Jre-miRN5910	CUAUUAUAUAAUAGACAUAU	GUAUGUUGGGCUAUAGUAG	48	67	1	19	-7.23
Jr02_26760_p1	JrWRKY17	Jre-miRN5912	UUCUGUU	GGCAGAA	3	9	12	18	-4.67
Jr03_08810_p1	JrWRKY18	Jre-miR156a	UGUUUUUCUUUUUUUUUGU	ACAGAAGAGAGUGAGCA	117	135	3	19	-9.1
Jr03_08810_p1	JrWRKY18	Jre-miR156b	UUCUCUAUGUUUACAUUGUU	GACAGAAGAUAGAGAG	101	120	3	18	-9.68
Jr03_08810_p1	JrWRKY18	Jre-miR156c	UUCUCUAUGUUUACAUUGUU	GACAGAAGAUAGAGAG	101	120	3	18	-9.68
Jr03_08810_p1	JrWRKY18	Jre-miR156d	UUCUCUAUGUUUACAUUGUU	GACAGAAGAUAGAGAG	101	120	3	18	-9.68
Jr03_08810_p1	JrWRKY18	Jre-miR156e	UUCUCUAUGUUUACAUUGUU	GACAGAAGAUAGAGAG	101	120	3	18	-9.68
Jr03_08810_p1	JrWRKY18	Jre-miR156f	UGUCUUUGUUUUC	GAAGACAGAGAGCA	161	173	7	20	-9.86
Jr03_08810_p1	JrWRKY18	Jre-miR156g	UGUUUUUCUUUUUUUUUGU	ACAGAAGAGAGAGAGCA	117	135	4	20	-10.54
Jr03_08810_p1	JrWRKY18	Jre-miR156h	UGUUUUUCUUUUUUUUUGU	ACAGAAGAGAGUGAGCA	117	135	3	19	-9.1
Jr03_08810_p1	JrWRKY18	Jre-miR156i	UGUUUUUCUUUUUUUUUGU	ACAGAAGAGAGUGAGCA	117	135	3	19	-9.1
Jr03_08810_p1	JrWRKY18	Jre-miR156j	UGUUUUUCUUUUUUUUUGU	ACAGAAGAGAGUGAGCA	117	135	3	19	-9.1
Jr03_08810_p1	JrWRKY18	Jre-miR156k	UGUUUUUCUUUUUUUUUGU	ACAGAAGAGAGUGAGCA	117	135	3	19	-9.1
Jr03_08810_p1	JrWRKY18	Jre-miR156l	UGUUUUUCUUUUUUUUUGU	ACAGAAGAGAGUGAGCA	117	135	3	19	-9.1
Jr03_08810_p1	JrWRKY18	Jre-miR159a	CAGCUCCGU	AGGGAGCUG	173	181	11	19	-12.39
Jr03_08810_p1	JrWRKY18	Jre-miR159b	CUCCGCCCAGUUUG	UGGACUGAAGGGAG	45	58	2	15	-7.11
Jr03_08810_p1	JrWRKY18	Jre-miR159c	CUCCGCCCAGUUUG	UGGACUGAAGGGAG	45	58	2	15	-7.11
Jr03_08810_p1	JrWRKY18	Jre-miR159d	CUCCGCCCAGUUUG	UGGACUGAAGGGAG	45	58	3	16	-8.1
Jr03_08810_p1	JrWRKY18	Jre-miR159e	CUCCGCCCAGUUUG	UGGAUUGAAGGGAG	45	58	3	16	-7.42
Jr03_08810_p1	JrWRKY18	Jre-miR159f	UUCUUUUCUCUA	UGGAGUGAAGGGA	96	107	3	15	-3.76
Jr03_08810_p1	JrWRKY18	Jre-miR159g	CUCCGCCCAGUUUG	UGGACUGAAGGGAG	45	58	2	15	-7.11
Jr03_08810_p1	JrWRKY18	Jre-miR159h	CUCCGCCCAGUUUG	UGGACUGAAGGGAG	45	58	2	15	-7.11
Jr03_08810_p1	JrWRKY18	Jre-miR159i	CUCCGCCCAGUUUG	UGGACUGAAGGGAG	45	58	2	15	-7.11
Jr03_08810_p1	JrWRKY18	Jre-miR159j	CUCCGCCCAGUUUG	UGGACUGAAGGGAG	45	58	2	15	-7.11
Jr03_08810_p1	JrWRKY18	Jre-miR159k	CUCCGCCCAGUUUG	UGGAUUGAAGGGAG	45	58	3	16	-7.42
Jr03_08810_p1	JrWRKY18	Jre-miR162a	GCCCAGUUUGUC	GAUAAACCUCUGC	49	60	3	15	-7.21
Jr03_08810_p1	JrWRKY18	Jre-miR162b	GCCCAGUUUGUC	GAUAAACCUCUGC	49	60	3	15	-7.21
Jr03_08810_p1	JrWRKY18	Jre-miR164a	UGUUUUUCU	GGAGAAGCA	117	125	2	10	-6.31
Jr03_08810_p1	JrWRKY18	Jre-miR164b	UGUUUUUCU	GGAGAAGCA	117	125	2	10	-6.31
Jr03_08810_p1	JrWRKY18	Jre-miR164c	UGUUUUUCU	GGAGAAGCA	117	125	2	10	-6.31
Jr03_08810_p1	JrWRKY18	Jre-miR164d	UGUUUUUCU	GGAGAAGCA	117	125	2	10	-6.31
Jr03_08810_p1	JrWRKY18	Jre-miR164e	UGUUUUUCU	GGAGAAGCA	117	125	2	10	-6.31
Jr03_08810_p1	JrWRKY18	Jre-miR165a	GAAUGAA	UUCAUUC	186	192	12	18	-3.88
Jr03_08810_p1	JrWRKY18	Jre-miR165b	GAAUGAA	UUCAUUC	186	192	12	18	-3.88
Jr03_08810_p1	JrWRKY18	Jre-miR165c	GAAUGAA	UUCAUUC	186	192	12	18	-3.88
Jr03_08810_p1	JrWRKY18	Jre-miR165d	GAAUGAA	UUCAUUC	186	192	12	18	-3.88
Jr03_08810_p1	JrWRKY18	Jre-miR165e	GAAUGAA	UUCAUUC	186	192	12	18	-3.88
Jr03_08810_p1	JrWRKY18	Jre-miR165f	GAAUGAA	UUCAUUC	186	192	12	18	-3.88
Jr03_08810_p1	JrWRKY18	Jre-miR165g	GAAUGAA	UUCAUUC	186	192	12	18	-3.88
Jr03_08810_p1	JrWRKY18	Jre-miR165h	GAAUGAA	UUCAUUC	186	192	12	18	-3.88
Jr03_08810_p1	JrWRKY18	Jre-miR165i	GAAUGAA	UUCAUUC	186	192	12	18	-3.88
Jr03_08810_p1	JrWRKY18	Jre-miR165j	GAAUGAA	UUCAUUC	186	192	12	18	-3.88
Jr03_08810_p1	JrWRKY18	Jre-miR165k	GAAUGAA	UUCAUUC	186	192	12	18	-3.88
Jr03_08810_p1	JrWRKY18	Jre-miR165l	GAAUGAA	UUCAUUC	186	192	12	18	-3.88
Jr03_08810_p1	JrWRKY18	Jre-miR165m	GAAUGAA	UUCAUUC	186	192	12	18	-3.91
Jr03_08810_p1	JrWRKY18	Jre-miR166a	GAAUGAA	UUCAUUC	186	192	14	20	-4.26
Jr03_08810_p1	JrWRKY18	Jre-miR168a	CGUGCGCCA	UGGUGCAGG	76	84	6	14	-7.54
Jr03_08810_p1	JrWRKY18	Jre-miR169h	CCGCCCAGUUUGUC	GAUGAAUUGCCGG	47	60	9	21	-8.67
Jr03_08810_p1	JrWRKY18	Jre-miR171a	GUAUCUGG	UUAGAUGC	8	15	1	8	-2.88
Jr03_08810_p1	JrWRKY18	Jre-miR172a	CAGUUUGUCAA	UUGAUGAUGCUG	52	62	7	18	-5.8
Jr03_08810_p1	JrWRKY18	Jre-miR172b	CAGUUUGUCAA	UUGAUGAUGCUG	52	62	7	18	-5.75
Jr03_08810_p1	JrWRKY18	Jre-miR172c	CAGUUUGUCAA	UUGAUGAUGCUG	52	62	7	18	-5.8
Jr03_08810_p1	JrWRKY18	Jre-miR172d	CAGUUUGUCAA	UUGAUGAUGCUG	52	62	7	18	-5.8
Jr03_08810_p1	JrWRKY18	Jre-miR172e	CAGUUUGUCAA	UUGAUGAUGCUG	52	62	7	18	-5.75
Jr03_08810_p1	JrWRKY18	Jre-miR172f	CAGUUUGUCAA	UUGAUGAUGCUG	52	62	7	18	-5.8
Jr03_08810_p1	JrWRKY18	Jre-miR390a	UGUUUUUCUUUUU	AGGAGGGAUAGCG	117	129	7	19	-5.29
Jr03_08810_p1	JrWRKY18	Jre-miR390b	UGUUUUUCUUUUU	AGGAGGGAUAGCG	117	129	7	19	-5.29
Jr03_08810_p1	JrWRKY18	Jre-miR390c	UGUUUUUCUUUUU	AGGAGGGAUAGCA	117	129	7	19	-6.04
Jr03_08810_p1	JrWRKY18	Jre-miR393a	CAUUGUUUUUCUUUU	AAAGGGAUCGCAUUG	114	128	4	18	-4.07
Jr03_08810_p1	JrWRKY18	Jre-miR393b	CAUUGUUUUUCUUUU	AAAGGGAUCGCAUUG	114	128	4	18	-4.07
Jr03_08810_p1	JrWRKY18	Jre-miR395a	UUCCCCCCCCUCCGCCCAG	CUGAAGUGUUUGGGGGAA	36	54	1	18	-13.46
Jr03_08810_p1	JrWRKY18	Jre-miR395b	UUCCCCCCCCUCCGCCCAG	CUGAAGUGUUUGGGGGAA	36	54	1	18	-13.46
Jr03_08810_p1	JrWRKY18	Jre-miR395c	UUCCCCCCCCUCCGCCCAG	CUGAAGUGUUUGGGGGAA	36	54	1	18	-13.46
Jr03_08810_p1	JrWRKY18	Jre-miR395d	UUCCCCCCCCUCCGCCCAG	CUGAAGUGUUUGGGGGAA	36	54	1	18	-13.46
Jr03_08810_p1	JrWRKY18	Jre-miR395e	UUCCCCCCCCUCCGCCCAG	CUGAAGUGUUUGGGGGAA	36	54	1	18	-13.46
Jr03_08810_p1	JrWRKY18	Jre-miR395f	UUCCCCCCCCUCCGCCCAG	CUGAAGUGUUUGGGGGAA	36	54	1	18	-13.46
Jr03_08810_p1	JrWRKY18	Jre-miR395g	UUCCCCCCCCUCCGCCCAG	CUGAAGUGUUUGGGGGAA	36	54	1	18	-13.46
Jr03_08810_p1	JrWRKY18	Jre-miR395h	UUCCCCCCCCUCCGCCCAG	CUGAAGUGUUUGGGGGAA	36	54	1	18	-13.46
Jr03_08810_p1	JrWRKY18	Jre-miR395i	UUCCCCCCCCUCCGCCCAG	CUGAAGUGUUUGGGGGAA	36	54	1	18	-13.46
Jr03_08810_p1	JrWRKY18	Jre-miR395j	UUCCCCCCCCUCCGCCCAG	CUGAAGUGUUUGGGGGAA	36	54	1	18	-13.46
Jr03_08810_p1	JrWRKY18	Jre-miR396b	CAGUUUG	UGAACUG	52	58	15	21	-2.99
Jr03_08810_p1	JrWRKY18	Jre-miR396c	CAGUUUG	UGAACUG	52	58	15	21	-2.99
Jr03_08810_p1	JrWRKY18	Jre-miR396d	CAGUUUG	UGAACUG	52	58	15	21	-2.99
Jr03_08810_p1	JrWRKY18	Jre-miR399a	GUUUUUCUUUUUU	AAAGGAGAAUUGC	118	130	5	17	-4.82
Jr03_08810_p1	JrWRKY18	Jre-miR399b	GUUUUUCUUUUUU	AAAGGAGAAUUGC	118	130	5	17	-4.82
Jr03_08810_p1	JrWRKY18	Jre-miR399c	CAAUUCUUUU	AGGAGAGUUG	93	102	7	16	-4.32
Jr03_08810_p1	JrWRKY18	Jre-miR399d	CAAUUCUUUU	AGGAGAGUUG	93	102	7	16	-4.32
Jr03_08810_p1	JrWRKY18	Jre-miR399e	CAAUUCUUUU	AGGAGAGUUG	93	102	7	16	-4.62
Jr03_08810_p1	JrWRKY18	Jre-miR399f	CAAUUCUUUU	AGGAGAGUUG	93	102	7	16	-4.62
Jr03_08810_p1	JrWRKY18	Jre-miR403a	AGUUUGUC	GCACAAACU	53	60	11	19	-5.63
Jr03_08810_p1	JrWRKY18	Jre-miR403b	AGUUUGUC	GCACAAACU	53	60	11	19	-5.63
Jr03_08810_p1	JrWRKY18	Jre-miR477a	GUCUUUG	CAAAGGC	162	168	6	12	-3.23
Jr03_08810_p1	JrWRKY18	Jre-miR477b	GUCUUUG	CAAAGGC	162	168	6	12	-3.23
Jr03_08810_p1	JrWRKY18	Jre-miR477c	GUCUUUG	CAAAGGC	162	168	6	12	-3.23
Jr03_08810_p1	JrWRKY18	Jre-miR477d	GUCUUUG	CAAAGGC	162	168	6	12	-3.23
Jr03_08810_p1	JrWRKY18	Jre-miR477e	GUCUUUG	CAAGGGC	162	168	9	15	-2.89
Jr03_08810_p1	JrWRKY18	Jre-miR530a	GCUCCGUAAAUG	CAUUUGCACCUGC	175	186	3	15	-3.52
Jr03_08810_p1	JrWRKY18	Jre-miR530b	GCUCCGUAAAUG	CAUUUGCACCUGC	175	186	3	15	-3.52
Jr03_08810_p1	JrWRKY18	Jre-miR530c	GCUCCGUAAAUG	CAUUUGCACCUGC	175	186	3	15	-3.52
Jr03_08810_p1	JrWRKY18	Jre-miR530d	GCUCCGUAAAUG	CAUUUGCACCUGC	175	186	3	15	-3.52
Jr03_08810_p1	JrWRKY18	Jre-miR5675a	UCUCUAUGUUUACAUUGUU	AGCAAUGGAUUCUGAGGGA	102	120	1	19	-9.72
Jr03_08810_p1	JrWRKY18	Jre-miR7972a	CAAUUCU	AGGGUUG	93	99	6	12	-1.86
Jr03_08810_p1	JrWRKY18	Jre-miRN745a	UCCGUAAAUGAAUGA	UCGUUGCGAUUACGGG	177	191	6	21	-7.75
Jr03_08810_p1	JrWRKY18	Jre-miRN745b	UCCGUAAAUGAAUGA	UCGUUGCGAUUACGGG	177	191	6	21	-7.75
Jr03_08810_p1	JrWRKY18	Jre-miRN745c	UCCGUAAAUGAAUGA	UCGUUGCGAUUACGGG	177	191	6	21	-7.75
Jr03_08810_p1	JrWRKY18	Jre-miRN5866	UGUAAUU	GAUUACA	133	139	13	19	-3.46
Jr03_08810_p1	JrWRKY18	Jre-miRN5867	GUCUUUA	UAGAGAU	218	224	1	7	-2.56
Jr03_08810_p1	JrWRKY18	Jre-miRN5869	UUUGUAA	UUGCAAG	131	137	15	21	-1.87
Jr03_08810_p1	JrWRKY18	Jre-miRN5871	CUAUGUUUACAUUGUUUUUC	GGAAGGCUUUGGCAUGG	105	124	7	23	-8.41
Jr03_08810_p1	JrWRKY18	Jre-miRN5872	UUUUCUUUUUUUUUGUAA	UUGCAAGACUGAACCGGAGGA	120	137	2	22	-5.43
Jr03_08810_p1	JrWRKY18	Jre-miRN5874	UUUCAGC	GCUGGAA	170	176	1	7	-6.49
Jr03_08810_p1	JrWRKY18	Jre-miRN5877	GUUUUUCUUUU	GAAGGGAAAAC	118	128	1	11	-8.63
Jr03_08810_p1	JrWRKY18	Jre-miRN5878	GUUUACAUU	GAUGUGAAC	109	117	5	13	-6.71
Jr03_08810_p1	JrWRKY18	Jre-miRN5879	GUUUUCAG	CUGAAAGC	168	175	12	19	-6.76
Jr03_08810_p1	JrWRKY18	Jre-miRN5881	GUUUUCAG	CUGAAAGC	168	175	12	19	-6.76
Jr03_08810_p1	JrWRKY18	Jre-miRN5883	GUCCCCU	GGGGGAC	30	36	2	8	-10.07
Jr03_08810_p1	JrWRKY18	Jre-miRN5886	UGUAAUU	AAUUACA	133	139	5	11	-2.46
Jr03_08810_p1	JrWRKY18	Jre-miRN5887	UCGUGCG	UGUAUGA	75	81	5	11	-2.19
Jr03_08810_p1	JrWRKY18	Jre-miRN5888	AUGUUUACAUUGUU	GACGAUGUAGGACGU	107	120	7	21	-8.38
Jr03_08810_p1	JrWRKY18	Jre-miRN5889	AUUCUUUUCUCUAUGUUUACAUUG	CAAUGGCACAGUGAAGAAU	95	118	1	19	-7.97
Jr03_08810_p1	JrWRKY18	Jre-miRN5890	UUUGUUUUCAG	CUGAGGAUGAA	165	175	2	12	-5.34
Jr03_08810_p1	JrWRKY18	Jre-miRN5893	GUCUUUG	CAAAGGC	162	168	11	17	-4.19
Jr03_08810_p1	JrWRKY18	Jre-miRN5894	UUUUCUCUAUGUUUA	UGAUUAUAGAGAGGG	99	113	3	17	-9.11
Jr03_08810_p1	JrWRKY18	Jre-miRN5895	GUCUUUGUUUUCAGCUCCG	UGGAGAAGCAGGGGC	162	180	7	21	-7.81
Jr03_08810_p1	JrWRKY18	Jre-miRN5896	GUCUUUGUUUUCAGCUCCG	UGGAGAAGCAGGGGC	162	180	7	21	-7.81
Jr03_08810_p1	JrWRKY18	Jre-miRN5897	GUCUUUGUUUUCAGCUCCG	UGGAGAAGCAGGGGC	162	180	7	21	-7.81
Jr03_08810_p1	JrWRKY18	Jre-miRN5898	GUCUUUGUUUUCAGCUCCG	UGGAGAAGCAGGGGC	162	180	7	21	-7.81
Jr03_08810_p1	JrWRKY18	Jre-miRN5899	UUUUCUCUAUGUUUACA	UGUGGGAUGAGAAGA	99	115	3	17	-6.68
Jr03_08810_p1	JrWRKY18	Jre-miRN5900	GAAUGAU	AUCGUUC	190	196	5	11	-3.57
Jr03_08810_p1	JrWRKY18	Jre-miRN5901	UUCAGCU	GGCUGAA	171	177	14	20	-7.33
Jr03_08810_p1	JrWRKY18	Jre-miRN5904	UCGUGCG	CGUGUGG	75	81	12	18	-0.54
Jr03_08810_p1	JrWRKY18	Jre-miRN5905	CUUCCCCCCCCUC	GAGGCCUUGGGGGAG	35	47	2	16	-15.45
Jr03_08810_p1	JrWRKY18	Jre-miRN5906	UGAAUGAAUGAUAAUA	UGUUAUCCUUGGCUCA	185	200	4	19	-2.47
Jr03_08810_p1	JrWRKY18	Jre-miRN5909	UGUAAUU	AAUUAUA	133	139	1	7	-0.84
Jr03_08810_p1	JrWRKY18	Jre-miRN5910	GCCCAGU	GUUGGGC	49	55	5	11	-6.47
Jr03_08810_p1	JrWRKY18	Jre-miRN5911	GCCCAGUUUGUCAAAUUGUGCGCG	UGCGUACUUGGGC	49	72	8	20	-2.49
Jr03_08810_p1	JrWRKY18	Jre-miRN5912	UUUGUCAA	UUGGCAGA	55	62	10	17	-5.81
Jr03_11540_p1	JrWRKY19	Jre-miR156a	CAUUCUCAUC	GAAGAGAGUG	167	176	6	15	-7.34
Jr03_11540_p1	JrWRKY19	Jre-miR156b	GUGUUCUCACCCUUC	GAAGAUAGAGAGCAC	115	129	7	21	-9.26
Jr03_11540_p1	JrWRKY19	Jre-miR156c	GUGUUCUCACCCUUC	GAAGAUAGAGAGCAC	115	129	7	21	-9.26
Jr03_11540_p1	JrWRKY19	Jre-miR156d	GUGUUCUCACCCUUC	GAAGAUAGAGAGCAC	115	129	7	21	-9.26
Jr03_11540_p1	JrWRKY19	Jre-miR156e	GUGUUCUCACCCUUC	GAAGAUAGAGAGCAC	115	129	7	21	-9.26
Jr03_11540_p1	JrWRKY19	Jre-miR156f	GUGUUCUCACCCUUC	GAAGACAGAGAGCAC	115	129	7	21	-9.14
Jr03_11540_p1	JrWRKY19	Jre-miR156g	GUGUUCUCACCCUUC	GAAGAGAGAGAGCAC	115	129	7	21	-10.04
Jr03_11540_p1	JrWRKY19	Jre-miR156h	CAUUCUCAUC	GAAGAGAGUG	167	176	6	15	-7.34
Jr03_11540_p1	JrWRKY19	Jre-miR156i	CAUUCUCAUC	GAAGAGAGUG	167	176	6	15	-7.34
Jr03_11540_p1	JrWRKY19	Jre-miR156j	CAUUCUCAUC	GAAGAGAGUG	167	176	6	15	-7.34
Jr03_11540_p1	JrWRKY19	Jre-miR156k	CAUUCUCAUC	GAAGAGAGUG	167	176	6	15	-7.34
Jr03_11540_p1	JrWRKY19	Jre-miR156l	CAUUCUCAUC	GAAGAGAGUG	167	176	6	15	-7.34
Jr03_11540_p1	JrWRKY19	Jre-miR159a	UUUUCUUCUUCCG	UGGAUUGAAGGGAG	26	38	3	16	-3.01
Jr03_11540_p1	JrWRKY19	Jre-miR159e	AUUCAGA	UUUGGAU	72	78	1	7	-1.58
Jr03_11540_p1	JrWRKY19	Jre-miR159k	AUUCAGA	UUUGGAU	72	78	1	7	-1.58
Jr03_11540_p1	JrWRKY19	Jre-miR160a	UAUUCAGAAUGAAACA	UGGCUCCCUGAAUG	71	86	5	18	-1.61
Jr03_11540_p1	JrWRKY19	Jre-miR160b	UAUUCAGAAUGAAACA	UGGCUCCCUGAAUG	71	86	5	18	-1.61
Jr03_11540_p1	JrWRKY19	Jre-miR164a	CGUGUUCUCACCCUUCCCC	GGAGAAGCAGGGCACG	114	132	2	17	-4.62
Jr03_11540_p1	JrWRKY19	Jre-miR164b	CGUGUUCUCACCCUUCCCC	GGAGAAGCAGGGCACG	114	132	2	17	-4.62
Jr03_11540_p1	JrWRKY19	Jre-miR164c	CGUGUUCUCACCCUUCCCC	GGAGAAGCAGGGCACG	114	132	2	17	-4.62
Jr03_11540_p1	JrWRKY19	Jre-miR164d	CGUGUUCUCACCCUUCCCC	GGAGAAGCAGGGCACG	114	132	2	17	-4.62
Jr03_11540_p1	JrWRKY19	Jre-miR164e	CGUGUUCUCACCCUUCCCC	GGAGAAGCAGGGCACG	114	132	2	17	-4.62
Jr03_11540_p1	JrWRKY19	Jre-miR165a	GAAUGAA	UUCAUUC	77	83	12	18	-4.85
Jr03_11540_p1	JrWRKY19	Jre-miR165b	GAAUGAA	UUCAUUC	77	83	12	18	-4.85
Jr03_11540_p1	JrWRKY19	Jre-miR165c	GAAUGAA	UUCAUUC	77	83	12	18	-4.85
Jr03_11540_p1	JrWRKY19	Jre-miR165d	GAAUGAA	UUCAUUC	77	83	12	18	-4.85
Jr03_11540_p1	JrWRKY19	Jre-miR165e	GAAUGAA	UUCAUUC	77	83	12	18	-4.85
Jr03_11540_p1	JrWRKY19	Jre-miR165f	GAAUGAA	UUCAUUC	77	83	12	18	-4.85
Jr03_11540_p1	JrWRKY19	Jre-miR165g	GAAUGAA	UUCAUUC	77	83	12	18	-4.85
Jr03_11540_p1	JrWRKY19	Jre-miR165h	GAAUGAA	UUCAUUC	77	83	12	18	-4.85
Jr03_11540_p1	JrWRKY19	Jre-miR165i	GAAUGAA	UUCAUUC	77	83	12	18	-4.85
Jr03_11540_p1	JrWRKY19	Jre-miR165j	GAAUGAA	UUCAUUC	77	83	12	18	-4.85
Jr03_11540_p1	JrWRKY19	Jre-miR165k	GAAUGAA	UUCAUUC	77	83	12	18	-4.85
Jr03_11540_p1	JrWRKY19	Jre-miR165l	GAAUGAA	UUCAUUC	77	83	12	18	-4.85
Jr03_11540_p1	JrWRKY19	Jre-miR165m	GAAUGAA	UUCAUUC	77	83	12	18	-4.8
Jr03_11540_p1	JrWRKY19	Jre-miR166a	GAAUGAA	UUCAUUC	77	83	14	20	-5.09
Jr03_11540_p1	JrWRKY19	Jre-miR167a	UCGUGUUCUCACCCUUC	GAAGCUGCCAGCAUGA	113	129	2	17	-2.28
Jr03_11540_p1	JrWRKY19	Jre-miR167b	UCGUGUUCUCACCCUUC	GAAGCUGCCAGCAUGA	113	129	2	17	-2.28
Jr03_11540_p1	JrWRKY19	Jre-miR167c	UCGUGUUCUCACCCUUC	GAAGCUGCCAGCAUGA	113	129	2	17	-2.28
Jr03_11540_p1	JrWRKY19	Jre-miR167d	UCGUGUUCUCACCCUUC	GAAGCUGCCAGCAUGA	113	129	2	17	-2.27
Jr03_11540_p1	JrWRKY19	Jre-miR167e	UCGUGUUCUCACCCUUC	GAAGCUGCCAGCAUGA	113	129	2	17	-2.28
Jr03_11540_p1	JrWRKY19	Jre-miR167f	UCGUGUUCUCACCCUUC	GAAGCUGCCAGCAUGA	113	129	2	17	-2.27
Jr03_11540_p1	JrWRKY19	Jre-miR167g	CAGAUCG	UGAUCUG	255	261	15	21	-5.06
Jr03_11540_p1	JrWRKY19	Jre-miR167h	CAGAUCG	UGAUCUG	255	261	15	21	-5.06
Jr03_11540_p1	JrWRKY19	Jre-miR170g	UCGAUCA	UGAUUGA	259	265	1	7	-1.25
Jr03_11540_p1	JrWRKY19	Jre-miR170h	UCGAUCA	UGAUUGA	259	265	1	7	-1.25
Jr03_11540_p1	JrWRKY19	Jre-miR170i	UCGAUCA	UGAUUGA	259	265	1	7	-1.25
Jr03_11540_p1	JrWRKY19	Jre-miR170j	UCGAUCA	UGAUUGA	259	265	1	7	-1.25
Jr03_11540_p1	JrWRKY19	Jre-miR170k	UCGAUCA	UGAUUGA	259	265	1	7	-1.25
Jr03_11540_p1	JrWRKY19	Jre-miR170l	UCGAUCA	UGAUUGA	259	265	1	7	-1.25
Jr03_11540_p1	JrWRKY19	Jre-miR170m	UCGAUCA	UGAUUGA	259	265	1	7	-1.25
Jr03_11540_p1	JrWRKY19	Jre-miR170o	UCGAUCA	UGAUUGA	259	265	1	7	-1.24
Jr03_11540_p1	JrWRKY19	Jre-miR171a	GUAUUUA	UAGAUGC	40	46	2	8	-2.59
Jr03_11540_p1	JrWRKY19	Jre-miR172a	GUGUAUUUACCGAUCGAGA	UCUUGAUGAUGCUGCAU	38	56	5	21	-5.3
Jr03_11540_p1	JrWRKY19	Jre-miR172b	GUAUUUACCGAUCGAGA	UCUUGAUGAUGC	40	56	5	16	-5.1
Jr03_11540_p1	JrWRKY19	Jre-miR172c	GUGUAUUUACCGAUCGAGA	UCUUGAUGAUGCUGCAU	38	56	5	21	-5.3
Jr03_11540_p1	JrWRKY19	Jre-miR172d	GUGUAUUUACCGAUCGAGA	UCUUGAUGAUGCUGCAU	38	56	5	21	-5.3
Jr03_11540_p1	JrWRKY19	Jre-miR172e	GUAUUUACCGAUCGAGA	UCUUGAUGAUGC	40	56	5	16	-5.1
Jr03_11540_p1	JrWRKY19	Jre-miR172f	GUGUAUUUACCGAUCGAGA	UCUUGAUGAUGCUGCAU	38	56	5	21	-5.3
Jr03_11540_p1	JrWRKY19	Jre-miR2111a	AAACUUU	GAGGUUU	18	24	14	20	-1.37
Jr03_11540_p1	JrWRKY19	Jre-miR2111b	AAACUUU	GAGGUUU	18	24	14	20	-1.37
Jr03_11540_p1	JrWRKY19	Jre-miR390a	UUCUUCC	GGAGGGA	31	37	8	14	-2.53
Jr03_11540_p1	JrWRKY19	Jre-miR390b	UUCUUCC	GGAGGGA	31	37	8	14	-2.53
Jr03_11540_p1	JrWRKY19	Jre-miR390c	UUCUUCC	GGAGGGA	31	37	8	14	-2.55
Jr03_11540_p1	JrWRKY19	Jre-miR393a	GAUCGAU	AUUGAUC	257	263	15	21	-2.12
Jr03_11540_p1	JrWRKY19	Jre-miR393b	GAUCGAU	AUUGAUC	257	263	15	21	-2.12
Jr03_11540_p1	JrWRKY19	Jre-miR393c	AGAUCGAU	AUUGAUCU	256	263	15	22	-2.18
Jr03_11540_p1	JrWRKY19	Jre-miR394a	CAGAAUG	CAUUCUG	75	81	5	11	-4.43
Jr03_11540_p1	JrWRKY19	Jre-miR394b	CAGAAUG	CAUUCUG	75	81	5	11	-4.43
Jr03_11540_p1	JrWRKY19	Jre-miR394c	CAGAAUG	CAUUCUG	75	81	5	11	-4.43
Jr03_11540_p1	JrWRKY19	Jre-miR394d	CAGAAUG	CAUUCUG	75	81	5	11	-4.43
Jr03_11540_p1	JrWRKY19	Jre-miR395a	UUCCCCCAACA	UGUUUGGGGGAA	127	137	7	18	-12.11
Jr03_11540_p1	JrWRKY19	Jre-miR395b	UUCCCCCAACA	UGUUUGGGGGAA	127	137	7	18	-12.11
Jr03_11540_p1	JrWRKY19	Jre-miR395c	UUCCCCCAACA	UGUUUGGGGGAA	127	137	7	18	-12.11
Jr03_11540_p1	JrWRKY19	Jre-miR395d	UUCCCCCAACA	UGUUUGGGGGAA	127	137	7	18	-12.11
Jr03_11540_p1	JrWRKY19	Jre-miR395e	UUCCCCCAACA	UGUUUGGGGGAA	127	137	7	18	-12.11
Jr03_11540_p1	JrWRKY19	Jre-miR395f	UUCCCCCAACA	UGUUUGGGGGAA	127	137	7	18	-12.11
Jr03_11540_p1	JrWRKY19	Jre-miR395g	UUCCCCCAACA	UGUUUGGGGGAA	127	137	7	18	-12.11
Jr03_11540_p1	JrWRKY19	Jre-miR395h	UUCCCCCAACA	UGUUUGGGGGAA	127	137	7	18	-12.11
Jr03_11540_p1	JrWRKY19	Jre-miR395i	UUCCCCCAACA	UGUUUGGGGGAA	127	137	7	18	-12.11
Jr03_11540_p1	JrWRKY19	Jre-miR395j	UUCCCCCAACA	UGUUUGGGGGAA	127	137	7	18	-12.11
Jr03_11540_p1	JrWRKY19	Jre-miR396a	UCGAGAAAGUUG	CAGCUUUCUUGA	51	62	6	17	-11.6
Jr03_11540_p1	JrWRKY19	Jre-miR396b	UCGAGAAAGUUG	CAGCUUUCUUGA	51	62	6	17	-10.96
Jr03_11540_p1	JrWRKY19	Jre-miR396c	UCGAGAAAGUUG	CAGCUUUCUUGA	51	62	6	17	-10.96
Jr03_11540_p1	JrWRKY19	Jre-miR396d	UCGAGAAAGUUG	CAGCUUUCUUGA	51	62	6	17	-10.96
Jr03_11540_p1	JrWRKY19	Jre-miR396e	UCGAGAAAGUUG	CAGCUUUCUUGA	51	62	6	17	-11.57
Jr03_11540_p1	JrWRKY19	Jre-miR396f	UCGAGAAAGUUG	CAGCUUUCUUGA	51	62	6	17	-11.57
Jr03_11540_p1	JrWRKY19	Jre-miR397a	CGUGUAUUUA	UGAGUGCAGCG	37	46	5	15	-3.47
Jr03_11540_p1	JrWRKY19	Jre-miR398a	GAACAUG	UGUGUUC	154	160	1	7	-3.87
Jr03_11540_p1	JrWRKY19	Jre-miR398b	GAACAUG	UGUGUUC	154	160	1	7	-3.87
Jr03_11540_p1	JrWRKY19	Jre-miR398c	GAACAUG	UGUGUUC	154	160	1	7	-4.21
Jr03_11540_p1	JrWRKY19	Jre-miR398d	GAACAUG	UGUGUUC	154	160	1	7	-4.21
Jr03_11540_p1	JrWRKY19	Jre-miR398e	GAACAUG	UGUGUUC	154	160	1	7	-4.21
Jr03_11540_p1	JrWRKY19	Jre-miR398f	GAACAUG	UAUGUUC	154	160	1	7	-5.23
Jr03_11540_p1	JrWRKY19	Jre-miR399c	AAGGAACAAACUUUU	GAGAGUUGCCCUU	11	25	9	21	-3.54
Jr03_11540_p1	JrWRKY19	Jre-miR399d	AAGGAACAAACUUUU	GAGAGUUGCCCUU	11	25	9	21	-3.54
Jr03_11540_p1	JrWRKY19	Jre-miR399e	AGGAACAAACUUUUU	GGAGAGUUGCCCU	12	26	8	20	-3.67
Jr03_11540_p1	JrWRKY19	Jre-miR399f	AGGAACAAACUUUUU	GGAGAGUUGCCCU	12	26	8	20	-3.67
Jr03_11540_p1	JrWRKY19	Jre-miR5675a	UUCAGAAU	AUUCUGAG	73	80	9	16	-5.81
Jr03_11540_p1	JrWRKY19	Jre-miR7972a	AAUCACAUUCUCAUCCCGCCC	GGGUUGUGAUU	162	182	7	17	-6.85
Jr03_11540_p1	JrWRKY19	Jre-miRN745a	GCCCAAAAAAAAAAAACGAUCGAA	UUGGGUCGUUGCGAUUACGGGU	179	202	1	22	-10
Jr03_11540_p1	JrWRKY19	Jre-miRN745b	GCCCAAAAAAAAAAAACGAUCGAA	UUGGGUCGUUGCGAUUACGGGU	179	202	1	22	-10
Jr03_11540_p1	JrWRKY19	Jre-miRN745c	GCCCAAAAAAAAAAAACGAUCGAA	UUGGGUCGUUGCGAUUACGGGU	179	202	1	22	-10
Jr03_11540_p1	JrWRKY19	Jre-miRN5866	AUGUAAUC	GAUUACAU	158	165	13	20	-6.43
Jr03_11540_p1	JrWRKY19	Jre-miRN5867	AGGACGAAGA	UCCUCGUUUU	238	247	7	16	-5.14
Jr03_11540_p1	JrWRKY19	Jre-miRN5868	UAUUCAGAAUGAA	UUCCUCUGAAUA	71	83	2	13	-5.87
Jr03_11540_p1	JrWRKY19	Jre-miRN5869	UAAAGGAA	UUCCUUUG	9	16	10	17	-4.91
Jr03_11540_p1	JrWRKY19	Jre-miRN5871	UCCGUGUAUUUACCGAUCGA	UCGGAAGGCUUUGGCAUGGG	35	54	5	24	-8.82
Jr03_11540_p1	JrWRKY19	Jre-miRN5872	UCUUCCGUGU	ACCGGAGGA	32	41	14	22	-6.17
Jr03_11540_p1	JrWRKY19	Jre-miRN5873	AGCUAGAAACA	UGUCUCUGGCU	94	104	12	22	-9.55
Jr03_11540_p1	JrWRKY19	Jre-miRN5874	UUCAGAAUGAAACA	UGGAACGUUUUGAG	73	86	3	16	-4.68
Jr03_11540_p1	JrWRKY19	Jre-miRN5877	CUUUUUUUUCUUC	GAAGGGAAAACUGAG	21	33	1	15	-3.05
Jr03_11540_p1	JrWRKY19	Jre-miRN5878	ACAAUUAAGG	CCUUGAUGU	231	240	1	9	-6.24
Jr03_11540_p1	JrWRKY19	Jre-miRN5879	AUUCAGAAU	GUUCUGAAU	72	80	3	11	-6.51
Jr03_11540_p1	JrWRKY19	Jre-miRN5880	CUUGACAAGGAGAAAC	GUUUCUCUGUAUAAG	209	224	7	21	-9.02
Jr03_11540_p1	JrWRKY19	Jre-miRN5881	AUUCAGAAU	GUUCUGAAU	72	80	3	11	-6.51
Jr03_11540_p1	JrWRKY19	Jre-miRN5882	AAGGAGA	UUUCCUU	215	221	4	10	-5.7
Jr03_11540_p1	JrWRKY19	Jre-miRN5883	UCUUCCG	CGGGGGA	32	38	1	7	-1.01
Jr03_11540_p1	JrWRKY19	Jre-miRN5887	AGGACGAAGAAAAUUAUCAGAU	GUCUGUAUGAUUUUUAUGCCU	238	259	2	22	-8.51
Jr03_11540_p1	JrWRKY19	Jre-miRN5890	CAUUCUCA	UGAGGAUG	167	174	3	10	-6.71
Jr03_11540_p1	JrWRKY19	Jre-miRN5892	AGCUAGAAACA	UGUGCUCUAGCU	94	104	3	14	-9.8
Jr03_11540_p1	JrWRKY19	Jre-miRN5894	GUGUUCUC	GAGGGCAU	115	122	13	20	-5.71
Jr03_11540_p1	JrWRKY19	Jre-miRN5895	CCCUUCCCCCAACAAGG	UUUUGUUGGAGAAGCAGGGG	124	140	1	20	-8.06
Jr03_11540_p1	JrWRKY19	Jre-miRN5896	CCCUUCCCCCAACAAGG	UUUUGUUGGAGAAGCAGGGG	124	140	1	20	-8.06
Jr03_11540_p1	JrWRKY19	Jre-miRN5897	CCCUUCCCCCAACAAGG	UUUUGUUGGAGAAGCAGGGG	124	140	1	20	-8.06
Jr03_11540_p1	JrWRKY19	Jre-miRN5898	CCCUUCCCCCAACAAGG	UUUUGUUGGAGAAGCAGGGG	124	140	1	20	-8.06
Jr03_11540_p1	JrWRKY19	Jre-miRN5899	UUCUCAUCCCGC	GUGGGAUGAGAA	169	180	4	15	-17.39
Jr03_11540_p1	JrWRKY19	Jre-miRN5900	UCAGAAUGA	UCGUUCUGG	74	82	6	14	-6.47
Jr03_11540_p1	JrWRKY19	Jre-miRN5905	CAUUCUCAUCCCGCCC	GAGGCCUUGGGGGAGAGUG	167	182	2	20	-14.03
Jr03_11540_p1	JrWRKY19	Jre-miRN5906	CAAGGAUAA	UUAUCCUUG	136	144	6	14	-7.36
Jr03_11540_p1	JrWRKY19	Jre-miRN5908	GUGAUAAUUAAAGGAACA	UGAUCUUUUAACUGGC	1	18	6	21	-4.77
Jr03_11540_p1	JrWRKY19	Jre-miRN5909	AUCAGAU	AUCUGAU	253	259	10	16	-5.76
Jr03_11540_p1	JrWRKY19	Jre-miRN5910	CCCAACA	UGUUGGG	131	137	4	10	-7.58
Jr03_11540_p1	JrWRKY19	Jre-miRN5912	UUGACAAGGAGA	UCUCCUUGGCAG	210	221	5	16	-11.21
Jr03_11550_p1	JrWRKY20	Jre-miR156a	CAUUCUCAUC	GAAGAGAGUG	135	144	6	15	-7.35
Jr03_11550_p1	JrWRKY20	Jre-miR156b	GUGUUCUCACCCUUC	GAAGAUAGAGAGCAC	83	97	7	21	-9.46
Jr03_11550_p1	JrWRKY20	Jre-miR156c	GUGUUCUCACCCUUC	GAAGAUAGAGAGCAC	83	97	7	21	-9.46
Jr03_11550_p1	JrWRKY20	Jre-miR156d	GUGUUCUCACCCUUC	GAAGAUAGAGAGCAC	83	97	7	21	-9.46
Jr03_11550_p1	JrWRKY20	Jre-miR156e	GUGUUCUCACCCUUC	GAAGAUAGAGAGCAC	83	97	7	21	-9.46
Jr03_11550_p1	JrWRKY20	Jre-miR156f	GUGUUCUCACCCUUC	GAAGACAGAGAGCAC	83	97	7	21	-9.34
Jr03_11550_p1	JrWRKY20	Jre-miR156g	GUGUUCUCACCCUUC	GAAGAGAGAGAGCAC	83	97	7	21	-10.24
Jr03_11550_p1	JrWRKY20	Jre-miR156h	CAUUCUCAUC	GAAGAGAGUG	135	144	6	15	-7.35
Jr03_11550_p1	JrWRKY20	Jre-miR156i	CAUUCUCAUC	GAAGAGAGUG	135	144	6	15	-7.35
Jr03_11550_p1	JrWRKY20	Jre-miR156j	CAUUCUCAUC	GAAGAGAGUG	135	144	6	15	-7.35
Jr03_11550_p1	JrWRKY20	Jre-miR156k	CAUUCUCAUC	GAAGAGAGUG	135	144	6	15	-7.35
Jr03_11550_p1	JrWRKY20	Jre-miR156l	CAUUCUCAUC	GAAGAGAGUG	135	144	6	15	-7.35
Jr03_11550_p1	JrWRKY20	Jre-miR159a	AUUCAGA	UUUGGAU	40	46	1	7	-2.15
Jr03_11550_p1	JrWRKY20	Jre-miR159e	AUUCAGA	UUUGGAU	40	46	1	7	-1.92
Jr03_11550_p1	JrWRKY20	Jre-miR159k	AUUCAGA	UUUGGAU	40	46	1	7	-1.92
Jr03_11550_p1	JrWRKY20	Jre-miR160a	UAUUCAGAAUGAAACA	UGGCUCCCUGAAUG	39	54	5	18	-1.94
Jr03_11550_p1	JrWRKY20	Jre-miR160b	UAUUCAGAAUGAAACA	UGGCUCCCUGAAUG	39	54	5	18	-1.94
Jr03_11550_p1	JrWRKY20	Jre-miR164a	CGUGUUCUCACCCUUCCCC	GGAGAAGCAGGGCACG	82	100	2	17	-4.82
Jr03_11550_p1	JrWRKY20	Jre-miR164b	CGUGUUCUCACCCUUCCCC	GGAGAAGCAGGGCACG	82	100	2	17	-4.82
Jr03_11550_p1	JrWRKY20	Jre-miR164c	CGUGUUCUCACCCUUCCCC	GGAGAAGCAGGGCACG	82	100	2	17	-4.82
Jr03_11550_p1	JrWRKY20	Jre-miR164d	CGUGUUCUCACCCUUCCCC	GGAGAAGCAGGGCACG	82	100	2	17	-4.82
Jr03_11550_p1	JrWRKY20	Jre-miR164e	CGUGUUCUCACCCUUCCCC	GGAGAAGCAGGGCACG	82	100	2	17	-4.82
Jr03_11550_p1	JrWRKY20	Jre-miR165a	GAAUGAA	UUCAUUC	45	51	12	18	-4.95
Jr03_11550_p1	JrWRKY20	Jre-miR165b	GAAUGAA	UUCAUUC	45	51	12	18	-4.95
Jr03_11550_p1	JrWRKY20	Jre-miR165c	GAAUGAA	UUCAUUC	45	51	12	18	-4.95
Jr03_11550_p1	JrWRKY20	Jre-miR165d	GAAUGAA	UUCAUUC	45	51	12	18	-4.95
Jr03_11550_p1	JrWRKY20	Jre-miR165e	GAAUGAA	UUCAUUC	45	51	12	18	-4.95
Jr03_11550_p1	JrWRKY20	Jre-miR165f	GAAUGAA	UUCAUUC	45	51	12	18	-4.95
Jr03_11550_p1	JrWRKY20	Jre-miR165g	GAAUGAA	UUCAUUC	45	51	12	18	-4.95
Jr03_11550_p1	JrWRKY20	Jre-miR165h	GAAUGAA	UUCAUUC	45	51	12	18	-4.95
Jr03_11550_p1	JrWRKY20	Jre-miR165i	GAAUGAA	UUCAUUC	45	51	12	18	-4.95
Jr03_11550_p1	JrWRKY20	Jre-miR165j	GAAUGAA	UUCAUUC	45	51	12	18	-4.95
Jr03_11550_p1	JrWRKY20	Jre-miR165k	GAAUGAA	UUCAUUC	45	51	12	18	-4.95
Jr03_11550_p1	JrWRKY20	Jre-miR165l	GAAUGAA	UUCAUUC	45	51	12	18	-4.95
Jr03_11550_p1	JrWRKY20	Jre-miR165m	GAAUGAA	UUCAUUC	45	51	12	18	-4.93
Jr03_11550_p1	JrWRKY20	Jre-miR166a	GAAUGAA	UUCAUUC	45	51	14	20	-5.24
Jr03_11550_p1	JrWRKY20	Jre-miR167a	UCGUGUUCUCACCCUUC	GAAGCUGCCAGCAUGA	81	97	2	17	-2.5
Jr03_11550_p1	JrWRKY20	Jre-miR167b	UCGUGUUCUCACCCUUC	GAAGCUGCCAGCAUGA	81	97	2	17	-2.5
Jr03_11550_p1	JrWRKY20	Jre-miR167c	UCGUGUUCUCACCCUUC	GAAGCUGCCAGCAUGA	81	97	2	17	-2.5
Jr03_11550_p1	JrWRKY20	Jre-miR167d	UCGUGUUCUCACCCUUC	GAAGCUGCCAGCAUGA	81	97	2	17	-2.49
Jr03_11550_p1	JrWRKY20	Jre-miR167e	UCGUGUUCUCACCCUUC	GAAGCUGCCAGCAUGA	81	97	2	17	-2.5
Jr03_11550_p1	JrWRKY20	Jre-miR167f	UCGUGUUCUCACCCUUC	GAAGCUGCCAGCAUGA	81	97	2	17	-2.49
Jr03_11550_p1	JrWRKY20	Jre-miR167g	CAGAUCG	UGAUCUG	223	229	15	21	-5.06
Jr03_11550_p1	JrWRKY20	Jre-miR167h	CAGAUCG	UGAUCUG	223	229	15	21	-5.06
Jr03_11550_p1	JrWRKY20	Jre-miR170g	UCGAUCA	UGAUUGA	227	233	1	7	-1.25
Jr03_11550_p1	JrWRKY20	Jre-miR170h	UCGAUCA	UGAUUGA	227	233	1	7	-1.25
Jr03_11550_p1	JrWRKY20	Jre-miR170i	UCGAUCA	UGAUUGA	227	233	1	7	-1.25
Jr03_11550_p1	JrWRKY20	Jre-miR170j	UCGAUCA	UGAUUGA	227	233	1	7	-1.25
Jr03_11550_p1	JrWRKY20	Jre-miR170k	UCGAUCA	UGAUUGA	227	233	1	7	-1.25
Jr03_11550_p1	JrWRKY20	Jre-miR170l	UCGAUCA	UGAUUGA	227	233	1	7	-1.25
Jr03_11550_p1	JrWRKY20	Jre-miR170m	UCGAUCA	UGAUUGA	227	233	1	7	-1.25
Jr03_11550_p1	JrWRKY20	Jre-miR170o	UCGAUCA	UGAUUGA	227	233	1	7	-1.24
Jr03_11550_p1	JrWRKY20	Jre-miR171a	GUAUUUA	UAGAUGC	8	14	2	8	-3.56
Jr03_11550_p1	JrWRKY20	Jre-miR172a	GUGUAUUUACCGAUCGAGA	UCUUGAUGAUGCUGCAU	6	24	5	21	-6.46
Jr03_11550_p1	JrWRKY20	Jre-miR172b	GUAUUUACCGAUCGAGA	UCUUGAUGAUGC	8	24	5	16	-6.18
Jr03_11550_p1	JrWRKY20	Jre-miR172c	GUGUAUUUACCGAUCGAGA	UCUUGAUGAUGCUGCAU	6	24	5	21	-6.46
Jr03_11550_p1	JrWRKY20	Jre-miR172d	GUGUAUUUACCGAUCGAGA	UCUUGAUGAUGCUGCAU	6	24	5	21	-6.46
Jr03_11550_p1	JrWRKY20	Jre-miR172e	GUAUUUACCGAUCGAGA	UCUUGAUGAUGC	8	24	5	16	-6.18
Jr03_11550_p1	JrWRKY20	Jre-miR172f	GUGUAUUUACCGAUCGAGA	UCUUGAUGAUGCUGCAU	6	24	5	21	-6.46
Jr03_11550_p1	JrWRKY20	Jre-miR393a	GAUCGAU	AUUGAUC	225	231	15	21	-2.12
Jr03_11550_p1	JrWRKY20	Jre-miR393b	GAUCGAU	AUUGAUC	225	231	15	21	-2.12
Jr03_11550_p1	JrWRKY20	Jre-miR393c	AGAUCGAU	AUUGAUCU	224	231	15	22	-2.18
Jr03_11550_p1	JrWRKY20	Jre-miR394a	CAGAAUG	CAUUCUG	43	49	5	11	-4.75
Jr03_11550_p1	JrWRKY20	Jre-miR394b	CAGAAUG	CAUUCUG	43	49	5	11	-4.75
Jr03_11550_p1	JrWRKY20	Jre-miR394c	CAGAAUG	CAUUCUG	43	49	5	11	-4.75
Jr03_11550_p1	JrWRKY20	Jre-miR394d	CAGAAUG	CAUUCUG	43	49	5	11	-4.75
Jr03_11550_p1	JrWRKY20	Jre-miR395a	UUCCCCCAACA	UGUUUGGGGGAA	95	105	7	18	-12.15
Jr03_11550_p1	JrWRKY20	Jre-miR395b	UUCCCCCAACA	UGUUUGGGGGAA	95	105	7	18	-12.15
Jr03_11550_p1	JrWRKY20	Jre-miR395c	UUCCCCCAACA	UGUUUGGGGGAA	95	105	7	18	-12.15
Jr03_11550_p1	JrWRKY20	Jre-miR395d	UUCCCCCAACA	UGUUUGGGGGAA	95	105	7	18	-12.15
Jr03_11550_p1	JrWRKY20	Jre-miR395e	UUCCCCCAACA	UGUUUGGGGGAA	95	105	7	18	-12.15
Jr03_11550_p1	JrWRKY20	Jre-miR395f	UUCCCCCAACA	UGUUUGGGGGAA	95	105	7	18	-12.15
Jr03_11550_p1	JrWRKY20	Jre-miR395g	UUCCCCCAACA	UGUUUGGGGGAA	95	105	7	18	-12.15
Jr03_11550_p1	JrWRKY20	Jre-miR395h	UUCCCCCAACA	UGUUUGGGGGAA	95	105	7	18	-12.15
Jr03_11550_p1	JrWRKY20	Jre-miR395i	UUCCCCCAACA	UGUUUGGGGGAA	95	105	7	18	-12.15
Jr03_11550_p1	JrWRKY20	Jre-miR395j	UUCCCCCAACA	UGUUUGGGGGAA	95	105	7	18	-12.15
Jr03_11550_p1	JrWRKY20	Jre-miR396a	UCGAGAAAGUUG	CAGCUUUCUUGA	19	30	6	17	-12.21
Jr03_11550_p1	JrWRKY20	Jre-miR396b	UCGAGAAAGUUG	CAGCUUUCUUGA	19	30	6	17	-11.57
Jr03_11550_p1	JrWRKY20	Jre-miR396c	UCGAGAAAGUUG	CAGCUUUCUUGA	19	30	6	17	-11.57
Jr03_11550_p1	JrWRKY20	Jre-miR396d	UCGAGAAAGUUG	CAGCUUUCUUGA	19	30	6	17	-11.57
Jr03_11550_p1	JrWRKY20	Jre-miR396e	UCGAGAAAGUUG	CAGCUUUCUUGA	19	30	6	17	-12.18
Jr03_11550_p1	JrWRKY20	Jre-miR396f	UCGAGAAAGUUG	CAGCUUUCUUGA	19	30	6	17	-12.18
Jr03_11550_p1	JrWRKY20	Jre-miR397a	CGUGUAUUUA	UGAGUGCAGCG	5	14	5	15	-4.78
Jr03_11550_p1	JrWRKY20	Jre-miR398a	GAACAUG	UGUGUUC	122	128	1	7	-3.25
Jr03_11550_p1	JrWRKY20	Jre-miR398b	GAACAUG	UGUGUUC	122	128	1	7	-3.25
Jr03_11550_p1	JrWRKY20	Jre-miR398c	GAACAUG	UGUGUUC	122	128	1	7	-3.59
Jr03_11550_p1	JrWRKY20	Jre-miR398d	GAACAUG	UGUGUUC	122	128	1	7	-3.59
Jr03_11550_p1	JrWRKY20	Jre-miR398e	GAACAUG	UGUGUUC	122	128	1	7	-3.59
Jr03_11550_p1	JrWRKY20	Jre-miR398f	GAACAUG	UAUGUUC	122	128	1	7	-4.61
Jr03_11550_p1	JrWRKY20	Jre-miR5675a	UUCAGAAU	AUUCUGAG	41	48	9	16	-6.14
Jr03_11550_p1	JrWRKY20	Jre-miR7972a	AAUCACAUUCUCAUCCCGCCC	GGGUUGUGAUU	130	150	7	17	-6.85
Jr03_11550_p1	JrWRKY20	Jre-miRN745a	GCCCAAAAAAAAAAAACGAUCGAA	UUGGGUCGUUGCGAUUACGGGU	147	170	1	22	-10
Jr03_11550_p1	JrWRKY20	Jre-miRN745b	GCCCAAAAAAAAAAAACGAUCGAA	UUGGGUCGUUGCGAUUACGGGU	147	170	1	22	-10
Jr03_11550_p1	JrWRKY20	Jre-miRN745c	GCCCAAAAAAAAAAAACGAUCGAA	UUGGGUCGUUGCGAUUACGGGU	147	170	1	22	-10
Jr03_11550_p1	JrWRKY20	Jre-miRN5866	AUGUAAUC	GAUUACAU	126	133	13	20	-6.25
Jr03_11550_p1	JrWRKY20	Jre-miRN5867	AGGACGAAGA	UCCUCGUUUU	206	215	7	16	-5.14
Jr03_11550_p1	JrWRKY20	Jre-miRN5868	UAUUCAGAAUGAA	UUCCUCUGAAUA	39	51	2	13	-6.22
Jr03_11550_p1	JrWRKY20	Jre-miRN5871	UCCGUGUAUUUACCGAUCGA	UCGGAAGGCUUUGGCAUGGG	3	22	5	24	-10.35
Jr03_11550_p1	JrWRKY20	Jre-miRN5873	AGCUAGAAACA	UGUCUCUGGCU	62	72	12	22	-9.53
Jr03_11550_p1	JrWRKY20	Jre-miRN5874	UUCAGAAUGAAACA	UGGAACGUUUUGAG	41	54	3	16	-5.02
Jr03_11550_p1	JrWRKY20	Jre-miRN5878	ACAAUUAAGG	CCUUGAUGU	199	208	1	9	-6.24
Jr03_11550_p1	JrWRKY20	Jre-miRN5879	AUUCAGAAU	GUUCUGAAU	40	48	3	11	-6.83
Jr03_11550_p1	JrWRKY20	Jre-miRN5880	CUUGACAAGGAGAAAC	GUUUCUCUGUAUAAG	177	192	7	21	-9.02
Jr03_11550_p1	JrWRKY20	Jre-miRN5881	AUUCAGAAU	GUUCUGAAU	40	48	3	11	-6.83
Jr03_11550_p1	JrWRKY20	Jre-miRN5882	AAGGAGA	UUUCCUU	183	189	4	10	-5.7
Jr03_11550_p1	JrWRKY20	Jre-miRN5887	AGGACGAAGAAAAUUAUCAGAU	GUCUGUAUGAUUUUUAUGCCU	206	227	2	22	-8.51
Jr03_11550_p1	JrWRKY20	Jre-miRN5890	CAUUCUCA	UGAGGAUG	135	142	3	10	-6.75
Jr03_11550_p1	JrWRKY20	Jre-miRN5892	AGCUAGAAACA	UGUGCUCUAGCU	62	72	3	14	-9.78
Jr03_11550_p1	JrWRKY20	Jre-miRN5894	GUGUUCUC	GAGGGCAU	83	90	13	20	-5.92
Jr03_11550_p1	JrWRKY20	Jre-miRN5895	CCCUUCCCCCAACAAGG	UUUUGUUGGAGAAGCAGGGG	92	108	1	20	-8.12
Jr03_11550_p1	JrWRKY20	Jre-miRN5896	CCCUUCCCCCAACAAGG	UUUUGUUGGAGAAGCAGGGG	92	108	1	20	-8.12
Jr03_11550_p1	JrWRKY20	Jre-miRN5897	CCCUUCCCCCAACAAGG	UUUUGUUGGAGAAGCAGGGG	92	108	1	20	-8.12
Jr03_11550_p1	JrWRKY20	Jre-miRN5898	CCCUUCCCCCAACAAGG	UUUUGUUGGAGAAGCAGGGG	92	108	1	20	-8.12
Jr03_11550_p1	JrWRKY20	Jre-miRN5899	UUCUCAUCCCGC	GUGGGAUGAGAA	137	148	4	15	-17.4
Jr03_11550_p1	JrWRKY20	Jre-miRN5900	UCAGAAUGA	UCGUUCUGG	42	50	6	14	-6.78
Jr03_11550_p1	JrWRKY20	Jre-miRN5904	CCGAUCGAGAAAGUUGAAU	AUUUAAUAUCGUGUGG	15	33	3	18	-3.47
Jr03_11550_p1	JrWRKY20	Jre-miRN5905	CAUUCUCAUCCCGCCC	GAGGCCUUGGGGGAGAGUG	135	150	2	20	-14.03
Jr03_11550_p1	JrWRKY20	Jre-miRN5906	CAAGGAUAA	UUAUCCUUG	104	112	6	14	-7.35
Jr03_11550_p1	JrWRKY20	Jre-miRN5908	GAAAGUUGAAUAAAAUUAUUCAGA	UCUCAUGAUCUUUUAACUGGC	23	46	1	21	-2.59
Jr03_11550_p1	JrWRKY20	Jre-miRN5909	AUCAGAU	AUCUGAU	221	227	10	16	-5.76
Jr03_11550_p1	JrWRKY20	Jre-miRN5910	CCCAACA	UGUUGGG	99	105	4	10	-7.59
Jr03_11550_p1	JrWRKY20	Jre-miRN5912	UUGACAAGGAGA	UCUCCUUGGCAG	178	189	5	16	-11.21
Jr03_17800_p1	JrWRKY22	Jre-miR159d	GAGUCUUUAGU	ACUGAAGGGAGCUC	51	61	6	19	-2.16
Jr03_17800_p1	JrWRKY22	Jre-miR164a	UGCCUUG	CAGGGCA	89	95	9	15	-6.36
Jr03_17800_p1	JrWRKY22	Jre-miR164b	UGCCUUG	CAGGGCA	89	95	9	15	-6.36
Jr03_17800_p1	JrWRKY22	Jre-miR164c	UGCCUUG	CAGGGCA	89	95	9	15	-6.36
Jr03_17800_p1	JrWRKY22	Jre-miR164d	UGCCUUG	CAGGGCA	89	95	9	15	-6.36
Jr03_17800_p1	JrWRKY22	Jre-miR164e	UGCCUUG	CAGGGCA	89	95	9	15	-6.36
Jr03_17800_p1	JrWRKY22	Jre-miR168a	GAAGUGCACCA	UGGUGCAGGUC	25	35	6	16	-2.98
Jr03_17800_p1	JrWRKY22	Jre-miR172a	UGCUCUGUAUCGUU	GAUGAUGCUGCA	70	83	9	20	-1.56
Jr03_17800_p1	JrWRKY22	Jre-miR172c	UGCUCUGUAUCGUU	GAUGAUGCUGCA	70	83	9	20	-1.56
Jr03_17800_p1	JrWRKY22	Jre-miR172d	UGCUCUGUAUCGUU	GAUGAUGCUGCA	70	83	9	20	-1.56
Jr03_17800_p1	JrWRKY22	Jre-miR172f	UGCUCUGUAUCGUU	GAUGAUGCUGCA	70	83	9	20	-1.56
Jr03_17800_p1	JrWRKY22	Jre-miR2111a	AGACCUU	GAGGUUU	8	14	14	20	-3.28
Jr03_17800_p1	JrWRKY22	Jre-miR2111b	AGACCUU	GAGGUUU	8	14	14	20	-3.28
Jr03_17800_p1	JrWRKY22	Jre-miR395a	UUUCAAAUGC	GUGUUUGGGG	82	91	6	15	-4.11
Jr03_17800_p1	JrWRKY22	Jre-miR395b	UUUCAAAUGC	GUGUUUGGGG	82	91	6	15	-4.11
Jr03_17800_p1	JrWRKY22	Jre-miR395c	UUUCAAAUGC	GUGUUUGGGG	82	91	6	15	-4.11
Jr03_17800_p1	JrWRKY22	Jre-miR395d	UUUCAAAUGC	GUGUUUGGGG	82	91	6	15	-4.11
Jr03_17800_p1	JrWRKY22	Jre-miR395e	UUUCAAAUGC	GUGUUUGGGG	82	91	6	15	-4.11
Jr03_17800_p1	JrWRKY22	Jre-miR395f	UUUCAAAUGC	GUGUUUGGGG	82	91	6	15	-4.11
Jr03_17800_p1	JrWRKY22	Jre-miR395g	UUUCAAAUGC	GUGUUUGGGG	82	91	6	15	-4.11
Jr03_17800_p1	JrWRKY22	Jre-miR395h	UUUCAAAUGC	GUGUUUGGGG	82	91	6	15	-4.11
Jr03_17800_p1	JrWRKY22	Jre-miR395i	UUUCAAAUGC	GUGUUUGGGG	82	91	6	15	-4.11
Jr03_17800_p1	JrWRKY22	Jre-miR395j	UUUCAAAUGC	GUGUUUGGGG	82	91	6	15	-4.11
Jr03_17800_p1	JrWRKY22	Jre-miR398a	GACCUUGAAUAUA	UGUGUUCUCAGGUC	9	21	1	14	-7.06
Jr03_17800_p1	JrWRKY22	Jre-miR398b	GACCUUGAAUAUA	UGUGUUCUCAGGUC	9	21	1	14	-7.06
Jr03_17800_p1	JrWRKY22	Jre-miR398c	GACCUUGAAUAUA	UGUGUUCUCAGGUC	9	21	1	14	-5.48
Jr03_17800_p1	JrWRKY22	Jre-miR398d	GACCUUGAAUAUA	UGUGUUCUCAGGUC	9	21	1	14	-5.48
Jr03_17800_p1	JrWRKY22	Jre-miR398e	GACCUUGAAUAUA	UGUGUUCUCAGGUC	9	21	1	14	-5.48
Jr03_17800_p1	JrWRKY22	Jre-miR398f	GACCUUGAAUAUA	UAUGUUCUCAGGUC	9	21	1	14	-5.5
Jr03_17800_p1	JrWRKY22	Jre-miR403a	UGAGUCU	AGAUUCA	50	56	3	9	-4.49
Jr03_17800_p1	JrWRKY22	Jre-miR403b	UGAGUCU	AGAUUCA	50	56	3	9	-4.49
Jr03_17800_p1	JrWRKY22	Jre-miR472a	AGUGGGGAA	UUUCCUACU	59	67	3	11	-3.75
Jr03_17800_p1	JrWRKY22	Jre-miR472b	AGUGGGG	UCCCAUU	59	65	14	20	-1.96
Jr03_17800_p1	JrWRKY22	Jre-miR477a	GAGUCUUUAGUGGGGA	UCCCUCAAAGGCUU	51	66	1	14	-5.38
Jr03_17800_p1	JrWRKY22	Jre-miR477b	GAGUCUUUAGUGGGGA	UCCCUCAAAGGCUU	51	66	1	14	-5.38
Jr03_17800_p1	JrWRKY22	Jre-miR477c	GAGUCUUUAGUGGGGA	UCCCUCAAAGGCUU	51	66	1	14	-5.38
Jr03_17800_p1	JrWRKY22	Jre-miR477d	GAGUCUUUAGUGGGGA	UCCCUCAAAGGCUU	51	66	1	14	-5.38
Jr03_17800_p1	JrWRKY22	Jre-miR477e	AAGAAGUGC	GGGCUUCUU	23	31	12	20	-3.37
Jr03_17800_p1	JrWRKY22	Jre-miR482c	UGGGGAA	UUUCCUA	61	67	1	7	-0.83
Jr03_17800_p1	JrWRKY22	Jre-miR530a	CAAAUGC	GCAUUUG	85	91	2	8	-3.81
Jr03_17800_p1	JrWRKY22	Jre-miR530b	CAAAUGC	GCAUUUG	85	91	2	8	-3.81
Jr03_17800_p1	JrWRKY22	Jre-miR530c	CAAAUGC	GCAUUUG	85	91	2	8	-3.81
Jr03_17800_p1	JrWRKY22	Jre-miR530d	CAAAUGC	GCAUUUG	85	91	2	8	-3.81
Jr03_17800_p1	JrWRKY22	Jre-miR5675a	UCUUUAGUGGGGAAAUUGCU	AGCAAUGGAUUCUGAGGG	54	73	1	18	-0.45
Jr03_17800_p1	JrWRKY22	Jre-miR7972a	CAGACCUUGA	UCAGGGUUGUG	7	16	4	14	-6.11
Jr03_17800_p1	JrWRKY22	Jre-miRN5866	AUGAGUC	GAUUUAU	49	55	4	10	-2.95
Jr03_17800_p1	JrWRKY22	Jre-miRN5867	AAAAUGAGUCUUUA	UAGAGAUCCUCGUUUU	46	59	1	16	-6.53
Jr03_17800_p1	JrWRKY22	Jre-miRN5868	AGUGGGG	CUUCACU	59	65	14	20	-0.42
Jr03_17800_p1	JrWRKY22	Jre-miRN5870	UGGGGAA	UUUCCCG	61	67	1	7	-2.33
Jr03_17800_p1	JrWRKY22	Jre-miRN5871	CUAAAAAAUGAGUCUUU	GAAGGCUUUGGCAUGG	42	58	8	23	-4.48
Jr03_17800_p1	JrWRKY22	Jre-miRN5874	CGUUUCA	UGGAACG	80	86	3	9	-3.6
Jr03_17800_p1	JrWRKY22	Jre-miRN5876	GUGGGGA	UCUCUAU	60	66	8	14	-0.63
Jr03_17800_p1	JrWRKY22	Jre-miRN5877	AGUCUUUAGU	ACUGAGGAGCU	52	61	10	20	-2.45
Jr03_17800_p1	JrWRKY22	Jre-miRN5880	CCUUGAAUAUAGAAGAAGUGCAC	GUGUUUCUCUGUAUAAGG	11	33	5	22	-5.12
Jr03_17800_p1	JrWRKY22	Jre-miRN5882	AGAAGUG	CACUUCU	24	30	14	20	-5.77
Jr03_17800_p1	JrWRKY22	Jre-miRN5883	AGUCUUU	GGGGACU	52	58	3	9	-0.09
Jr03_17800_p1	JrWRKY22	Jre-miRN5885	GUGGGGA	UCUUCAC	60	66	11	17	-0.81
Jr03_17800_p1	JrWRKY22	Jre-miRN5886	AUUGCUCUGUAUCGUUUCAAAUGCCU	GGGCAAUUACACCUUGGGCAGU	68	93	1	22	-3.01
Jr03_17800_p1	JrWRKY22	Jre-miRN5888	UCUGUAUCGUUUCAAAUGCCU	AGGUUGACGAUGUAGG	73	93	2	17	-2.72
Jr03_17800_p1	JrWRKY22	Jre-miRN5890	AUGAGUCUUUAG	CUGAGGAUGAAU	49	60	2	13	-3.17
Jr03_17800_p1	JrWRKY22	Jre-miRN5893	GAGUCUUUAGUGGGGA	UCUUCUCUCAAAGGCUU	51	66	3	19	-5.33
Jr03_17800_p1	JrWRKY22	Jre-miRN5894	AUGCCUU	AGGGCAU	88	94	14	20	-8.81
Jr03_17800_p1	JrWRKY22	Jre-miRN5899	GAGUCUUU	GAAGACUU	51	58	13	20	-4.88
Jr03_17800_p1	JrWRKY22	Jre-miRN5901	CUUUAGUGGGGA	UCCCCUCGGCUGAAG	55	66	7	21	-6.73
Jr03_22520_p1	JrWRKY23	Jre-miR156a	UCUCUUUUG	CAGAAGAGA	272	280	4	12	-9.3
Jr03_22520_p1	JrWRKY23	Jre-miR156b	GCUUUUUACUACAGUAUCUCUUUUG	CAGAAGAUAGAGAGC	256	280	5	19	-9.6
Jr03_22520_p1	JrWRKY23	Jre-miR156c	GCUUUUUACUACAGUAUCUCUUUUG	CAGAAGAUAGAGAGC	256	280	5	19	-9.6
Jr03_22520_p1	JrWRKY23	Jre-miR156d	GCUUUUUACUACAGUAUCUCUUUUG	CAGAAGAUAGAGAGC	256	280	5	19	-9.6
Jr03_22520_p1	JrWRKY23	Jre-miR156e	GCUUUUUACUACAGUAUCUCUUUUG	CAGAAGAUAGAGAGC	256	280	5	19	-9.6
Jr03_22520_p1	JrWRKY23	Jre-miR156f	UGCUCUUCUCCUUGUG	CAGAAGACAGAGAGCA	175	190	5	20	-9.04
Jr03_22520_p1	JrWRKY23	Jre-miR156g	GCUUUUUACUACAGUAUCUCUUUUG	CAGAAGAGAGAGAGC	256	280	5	19	-12.18
Jr03_22520_p1	JrWRKY23	Jre-miR156h	UCUCUUUUG	CAGAAGAGA	272	280	4	12	-9.3
Jr03_22520_p1	JrWRKY23	Jre-miR156i	UCUCUUUUG	CAGAAGAGA	272	280	4	12	-9.3
Jr03_22520_p1	JrWRKY23	Jre-miR156j	UCUCUUUUG	CAGAAGAGA	272	280	4	12	-9.3
Jr03_22520_p1	JrWRKY23	Jre-miR156k	UCUCUUUUG	CAGAAGAGA	272	280	4	12	-9.3
Jr03_22520_p1	JrWRKY23	Jre-miR156l	UCUCUUUUG	CAGAAGAGA	272	280	4	12	-9.3
Jr03_22520_p1	JrWRKY23	Jre-miR159a	UACAGUAUCUCUUU	GAAGGGAGCUGUA	265	278	9	21	-10.49
Jr03_22520_p1	JrWRKY23	Jre-miR159b	UUCCUUUUA	UGAAGGGAG	164	172	7	15	-5.04
Jr03_22520_p1	JrWRKY23	Jre-miR159c	UUCCUUUUA	UGAAGGGAG	164	172	7	15	-5.04
Jr03_22520_p1	JrWRKY23	Jre-miR159d	UUCCUUUUA	UGAAGGGAG	164	172	8	16	-5.7
Jr03_22520_p1	JrWRKY23	Jre-miR159e	AGAGUUCAAGGGGAUC	GAUUGAAGGGAGCUCU	63	78	5	20	-7.67
Jr03_22520_p1	JrWRKY23	Jre-miR159f	CUCUUUUGAUUGUUUAACACUCCA	UGGAGUGAAGGGAG	273	296	3	16	-7.84
Jr03_22520_p1	JrWRKY23	Jre-miR159g	UUCCUUUUA	UGAAGGGAG	164	172	7	15	-5.04
Jr03_22520_p1	JrWRKY23	Jre-miR159h	UUCCUUUUA	UGAAGGGAG	164	172	7	15	-5.04
Jr03_22520_p1	JrWRKY23	Jre-miR159i	UUCCUUUUA	UGAAGGGAG	164	172	7	15	-5.04
Jr03_22520_p1	JrWRKY23	Jre-miR159j	UUCCUUUUA	UGAAGGGAG	164	172	7	15	-5.04
Jr03_22520_p1	JrWRKY23	Jre-miR159k	AGAGUUCAAGGGGAUC	GAUUGAAGGGAGCUCU	63	78	5	20	-7.67
Jr03_22520_p1	JrWRKY23	Jre-miR160a	AGUAGGUCGGGU	GCCUGGCUCCCU	50	61	2	13	-4.31
Jr03_22520_p1	JrWRKY23	Jre-miR160b	AGUAGGUCGGGU	GCCUGGCUCCCU	50	61	2	13	-4.31
Jr03_22520_p1	JrWRKY23	Jre-miR160c	AGUAGGUCGGGU	GCCUGGCUCCCU	50	61	2	13	-4.35
Jr03_22520_p1	JrWRKY23	Jre-miR160d	AGUAGGUCGGGU	GCCUGGCUCCCU	50	61	2	13	-4.35
Jr03_22520_p1	JrWRKY23	Jre-miR160e	AGUAGGUCGGGU	GCCUGGCUCCCU	50	61	2	13	-4.35
Jr03_22520_p1	JrWRKY23	Jre-miR160f	AGUAGGUCGGGU	GCCUGGCUCCCU	50	61	2	13	-4.35
Jr03_22520_p1	JrWRKY23	Jre-miR164a	UGACACCAUGCCCUGAAAACUUCACCA	UGGAGAAGCAGGGCACGUGCA	2	28	1	21	-13.92
Jr03_22520_p1	JrWRKY23	Jre-miR164b	UGACACCAUGCCCUGAAAACUUCACCA	UGGAGAAGCAGGGCACGUGCA	2	28	1	21	-13.92
Jr03_22520_p1	JrWRKY23	Jre-miR164c	UGACACCAUGCCCUGAAAACUUCACCA	UGGAGAAGCAGGGCACGUGCA	2	28	1	21	-13.92
Jr03_22520_p1	JrWRKY23	Jre-miR164d	UGACACCAUGCCCUGAAAACUUCACCA	UGGAGAAGCAGGGCACGUGCA	2	28	1	21	-13.92
Jr03_22520_p1	JrWRKY23	Jre-miR164e	UGACACCAUGCCCUGAAAACUUCACCA	UGGAGAAGCAGGGCACGUGCA	2	28	1	21	-13.92
Jr03_22520_p1	JrWRKY23	Jre-miR165a	GAUGAAGACU	GGCUUCAUU	146	155	9	17	-3.38
Jr03_22520_p1	JrWRKY23	Jre-miR165b	GAUGAAGACU	GGCUUCAUU	146	155	9	17	-3.38
Jr03_22520_p1	JrWRKY23	Jre-miR165c	GAUGAAGACU	GGCUUCAUU	146	155	9	17	-3.38
Jr03_22520_p1	JrWRKY23	Jre-miR165d	GAUGAAGACU	GGCUUCAUU	146	155	9	17	-3.38
Jr03_22520_p1	JrWRKY23	Jre-miR165e	GAUGAAGACU	GGCUUCAUU	146	155	9	17	-3.38
Jr03_22520_p1	JrWRKY23	Jre-miR165f	GAUGAAGACU	GGCUUCAUU	146	155	9	17	-3.38
Jr03_22520_p1	JrWRKY23	Jre-miR165g	GAUGAAGACU	GGCUUCAUU	146	155	9	17	-3.38
Jr03_22520_p1	JrWRKY23	Jre-miR165h	GAUGAAGACU	GGCUUCAUU	146	155	9	17	-3.38
Jr03_22520_p1	JrWRKY23	Jre-miR165i	GAUGAAGACU	GGCUUCAUU	146	155	9	17	-3.38
Jr03_22520_p1	JrWRKY23	Jre-miR165j	GAUGAAGACU	GGCUUCAUU	146	155	9	17	-3.38
Jr03_22520_p1	JrWRKY23	Jre-miR165k	GAUGAAGACU	GGCUUCAUU	146	155	9	17	-3.38
Jr03_22520_p1	JrWRKY23	Jre-miR165l	GAUGAAGACU	GGCUUCAUU	146	155	9	17	-3.38
Jr03_22520_p1	JrWRKY23	Jre-miR165m	GAUGAAGACU	GGCUUCAUU	146	155	9	17	-3.36
Jr03_22520_p1	JrWRKY23	Jre-miR166a	AGCUUCUUGAA	UUCAGGACCAGGCU	357	367	1	14	-6.11
Jr03_22520_p1	JrWRKY23	Jre-miR167a	AGAUUAUUAGAUGGUAGC	GCUGCCAGCAUGAUCU	199	216	5	20	-9.76
Jr03_22520_p1	JrWRKY23	Jre-miR167b	AGAUUAUUAGAUGGUAGC	GCUGCCAGCAUGAUCU	199	216	5	20	-9.76
Jr03_22520_p1	JrWRKY23	Jre-miR167c	AGAUUAUUAGAUGGUAGC	GCUGCCAGCAUGAUCU	199	216	5	20	-9.76
Jr03_22520_p1	JrWRKY23	Jre-miR167d	AAGAUUAUUAGAUGGUAGC	GCUGCCAGCAUGAUCUU	198	216	5	21	-11.22
Jr03_22520_p1	JrWRKY23	Jre-miR167e	AGAUUAUUAGAUGGUAGC	GCUGCCAGCAUGAUCU	199	216	5	20	-9.76
Jr03_22520_p1	JrWRKY23	Jre-miR167f	AAGAUUAUUAGAUGGUAGC	GCUGCCAGCAUGAUCUU	198	216	5	21	-11.22
Jr03_22520_p1	JrWRKY23	Jre-miR167g	AGAUUAUUAGAUGGUAGC	GCUGCCAGCAUGAUCU	199	216	5	20	-10.38
Jr03_22520_p1	JrWRKY23	Jre-miR167h	AGAUUAUUAGAUGGUAGC	GCUGCCAGCAUGAUCU	199	216	5	20	-10.38
Jr03_22520_p1	JrWRKY23	Jre-miR168a	UUCUCGAUGAAGACUA	UGGUGCAGGUCGGGAA	141	156	6	21	-3.9
Jr03_22520_p1	JrWRKY23	Jre-miR169a	GCACAGUUGUCACUUAAGC	GCCAAGGAUGACUUGC	215	233	3	18	-3.75
Jr03_22520_p1	JrWRKY23	Jre-miR169b	GCACAGUUGUCACUUAAGC	GCCAAGGAUGACUUGC	215	233	3	18	-3.75
Jr03_22520_p1	JrWRKY23	Jre-miR169c	GCACAGUUGUCACUUAAGC	GCCAAGGAUGACUUGC	215	233	3	18	-3.75
Jr03_22520_p1	JrWRKY23	Jre-miR169d	GCACAGUUGUCACUUAAGC	GCCAAGGAUGACUUGC	215	233	3	18	-3.75
Jr03_22520_p1	JrWRKY23	Jre-miR169e	GCACAGUUGUCACUUAAGC	GCCAAGGAUGACUUGC	215	233	3	18	-3.75
Jr03_22520_p1	JrWRKY23	Jre-miR169f	GCACAGUUGUCACUUAAGC	GCCAAGGAUGACUUGC	215	233	3	18	-3.75
Jr03_22520_p1	JrWRKY23	Jre-miR169g	GCACAGUUGUCACUUAAGC	GCCAAGGAUGACUUGC	215	233	3	18	-3.75
Jr03_22520_p1	JrWRKY23	Jre-miR169h	UUCAUUCAGCUU	AAGCCAAGGAUGAA	350	361	1	14	-5.58
Jr03_22520_p1	JrWRKY23	Jre-miR169i	GCACAGUUGUCACUUAAGC	GCCAAGGAUGACUUGC	215	233	3	18	-3.79
Jr03_22520_p1	JrWRKY23	Jre-miR169j	GCACAGUUGUCACUUAAGC	GCCAAGGAUGACUUGC	215	233	3	18	-3.79
Jr03_22520_p1	JrWRKY23	Jre-miR169k	GCACAGUUGUCACUUAAGC	GCCAAGGAUGACUUGC	215	233	3	18	-3.79
Jr03_22520_p1	JrWRKY23	Jre-miR170a	AGGGGAUCAGAAGCCA	UGGCCUGGUUCACU	71	86	4	17	-6.06
Jr03_22520_p1	JrWRKY23	Jre-miR170b	AGGGGAUCAGAAGCCA	UGGCCUGGUUCACU	71	86	4	17	-6.06
Jr03_22520_p1	JrWRKY23	Jre-miR170d	GACGUGG	CCGCGUC	409	415	6	12	-5.25
Jr03_22520_p1	JrWRKY23	Jre-miR170f	GACGUGG	CCGCGUC	409	415	6	12	-5.25
Jr03_22520_p1	JrWRKY23	Jre-miR170g	UUCGAUCA	UGAUUGAG	37	44	1	8	-2.82
Jr03_22520_p1	JrWRKY23	Jre-miR170h	UUCGAUCA	UGAUUGAG	37	44	1	8	-2.82
Jr03_22520_p1	JrWRKY23	Jre-miR170i	UUCGAUCA	UGAUUGAG	37	44	1	8	-2.82
Jr03_22520_p1	JrWRKY23	Jre-miR170j	UUCGAUCA	UGAUUGAG	37	44	1	8	-2.82
Jr03_22520_p1	JrWRKY23	Jre-miR170k	UUCGAUCA	UGAUUGAG	37	44	1	8	-2.82
Jr03_22520_p1	JrWRKY23	Jre-miR170l	UUCGAUCA	UGAUUGAG	37	44	1	8	-2.82
Jr03_22520_p1	JrWRKY23	Jre-miR170m	UUCGAUCA	UGAUUGAG	37	44	1	8	-2.82
Jr03_22520_p1	JrWRKY23	Jre-miR170o	UUCGAUCA	UGAUUGAG	37	44	1	8	-2.81
Jr03_22520_p1	JrWRKY23	Jre-miR171a	GUGGGUA	UGCCCAU	188	194	6	12	-4.87
Jr03_22520_p1	JrWRKY23	Jre-miR172a	CAGUAUCUCUUUUGAUU	AAUCUUGAUGAUGCUG	267	283	3	18	-7.73
Jr03_22520_p1	JrWRKY23	Jre-miR172b	CUACAGUAUCUCUUUUGAUU	AAUCUUGAUGAUGCUGCAG	264	283	3	21	-7.83
Jr03_22520_p1	JrWRKY23	Jre-miR172c	CAGUAUCUCUUUUGAUU	AAUCUUGAUGAUGCUG	267	283	3	18	-7.73
Jr03_22520_p1	JrWRKY23	Jre-miR172d	CAGUAUCUCUUUUGAUU	AAUCUUGAUGAUGCUG	267	283	3	18	-7.73
Jr03_22520_p1	JrWRKY23	Jre-miR172e	CUACAGUAUCUCUUUUGAUU	AAUCUUGAUGAUGCUGCAG	264	283	3	21	-7.83
Jr03_22520_p1	JrWRKY23	Jre-miR172f	CAGUAUCUCUUUUGAUU	AAUCUUGAUGAUGCUG	267	283	3	18	-7.73
Jr03_22520_p1	JrWRKY23	Jre-miR2111a	UGAACCUCAUGACUUCAGAUU	AAUCUGCAUCCUGAGGUUUA	458	478	2	21	-14.01
Jr03_22520_p1	JrWRKY23	Jre-miR2111b	UGAACCUCAUGACUUCAGAUU	AAUCUGCAUCCUGAGGUUUA	458	478	2	21	-14.01
Jr03_22520_p1	JrWRKY23	Jre-miR390a	GCCUAUCCAACUUUCUGCCUCACAGCUU	AAGCUCAGGAGGGAUAGCGC	232	259	1	20	-11.76
Jr03_22520_p1	JrWRKY23	Jre-miR390b	GCCUAUCCAACUUUCUGCCUCACAGCUU	AAGCUCAGGAGGGAUAGCGC	232	259	1	20	-11.76
Jr03_22520_p1	JrWRKY23	Jre-miR390c	UAUCUCUUUUGAUUGUUU	AAGCUCAGGAGGGAUA	270	287	1	16	-10.59
Jr03_22520_p1	JrWRKY23	Jre-miR393a	UAAUGCGAUC	GAUCGCAUUG	93	102	9	18	-7.7
Jr03_22520_p1	JrWRKY23	Jre-miR393b	UAAUGCGAUC	GAUCGCAUUG	93	102	9	18	-7.7
Jr03_22520_p1	JrWRKY23	Jre-miR393c	GACUAAUGCGAUC	GAUCGCAUUGAUC	90	102	9	21	-6.6
Jr03_22520_p1	JrWRKY23	Jre-miR395a	CCUCAUGACUUCAG	CUGAAGUGUUUGGGG	462	475	1	15	-14.02
Jr03_22520_p1	JrWRKY23	Jre-miR395b	CCUCAUGACUUCAG	CUGAAGUGUUUGGGG	462	475	1	15	-14.02
Jr03_22520_p1	JrWRKY23	Jre-miR395c	CCUCAUGACUUCAG	CUGAAGUGUUUGGGG	462	475	1	15	-14.02
Jr03_22520_p1	JrWRKY23	Jre-miR395d	CCUCAUGACUUCAG	CUGAAGUGUUUGGGG	462	475	1	15	-14.02
Jr03_22520_p1	JrWRKY23	Jre-miR395e	CCUCAUGACUUCAG	CUGAAGUGUUUGGGG	462	475	1	15	-14.02
Jr03_22520_p1	JrWRKY23	Jre-miR395f	CCUCAUGACUUCAG	CUGAAGUGUUUGGGG	462	475	1	15	-14.02
Jr03_22520_p1	JrWRKY23	Jre-miR395g	CCUCAUGACUUCAG	CUGAAGUGUUUGGGG	462	475	1	15	-14.02
Jr03_22520_p1	JrWRKY23	Jre-miR395h	CCUCAUGACUUCAG	CUGAAGUGUUUGGGG	462	475	1	15	-14.02
Jr03_22520_p1	JrWRKY23	Jre-miR395i	CCUCAUGACUUCAG	CUGAAGUGUUUGGGG	462	475	1	15	-14.02
Jr03_22520_p1	JrWRKY23	Jre-miR395j	CCUCAUGACUUCAG	CUGAAGUGUUUGGGG	462	475	1	15	-14.02
Jr03_22520_p1	JrWRKY23	Jre-miR396a	GAGUUCAAGGGGA	UCCCACAGCUUUCUUGAACUU	64	76	1	21	-9.05
Jr03_22520_p1	JrWRKY23	Jre-miR396b	AGUUCAAGGGG	UUUCUUGAACU	65	75	10	20	-6.79
Jr03_22520_p1	JrWRKY23	Jre-miR396c	AGUUCAAGGGG	UUUCUUGAACU	65	75	10	20	-6.79
Jr03_22520_p1	JrWRKY23	Jre-miR396d	AGUUCAAGGGG	UUUCUUGAACU	65	75	10	20	-6.79
Jr03_22520_p1	JrWRKY23	Jre-miR396e	GAGUUCAAGGGG	UUUCUUGAACUU	64	75	10	21	-7.76
Jr03_22520_p1	JrWRKY23	Jre-miR396f	GAGUUCAAGGGG	UUUCUUGAACUU	64	75	10	21	-7.76
Jr03_22520_p1	JrWRKY23	Jre-miR397a	UGCACUC	GAGUGCA	339	345	6	12	-8.45
Jr03_22520_p1	JrWRKY23	Jre-miR398a	GACUUGAAUUCCACA	UGUGUUCUCAGGUC	308	322	1	14	-6.76
Jr03_22520_p1	JrWRKY23	Jre-miR398b	GACUUGAAUUCCACA	UGUGUUCUCAGGUC	308	322	1	14	-6.76
Jr03_22520_p1	JrWRKY23	Jre-miR398c	AGAACAU	GUGUUCU	417	423	2	8	-5.3
Jr03_22520_p1	JrWRKY23	Jre-miR398d	AGAACAU	GUGUUCU	417	423	2	8	-5.3
Jr03_22520_p1	JrWRKY23	Jre-miR398e	AGAACAU	GUGUUCU	417	423	2	8	-5.3
Jr03_22520_p1	JrWRKY23	Jre-miR398f	AGAACAU	AUGUUCU	417	423	2	8	-5.02
Jr03_22520_p1	JrWRKY23	Jre-miR399a	GCUCUUCUCCUUGUGGGUA	UGCCAAAGGAGAAUUGC	176	194	1	17	-9.39
Jr03_22520_p1	JrWRKY23	Jre-miR399b	GCUCUUCUCCUUGUGGGUA	UGCCAAAGGAGAAUUGC	176	194	1	17	-9.39
Jr03_22520_p1	JrWRKY23	Jre-miR399c	GCUCUUCUCCUUGUGG	CCAAAGGAGAGUUGC	176	191	3	17	-8.38
Jr03_22520_p1	JrWRKY23	Jre-miR399d	GCUCUUCUCCUUGUGG	CCAAAGGAGAGUUGC	176	191	3	17	-8.38
Jr03_22520_p1	JrWRKY23	Jre-miR399e	GCUCUUCUCCUUGUGGGUA	UGCCAAAGGAGAGUUGC	176	194	1	17	-8.59
Jr03_22520_p1	JrWRKY23	Jre-miR399f	GCUCUUCUCCUUGUGGGUA	UGCCAAAGGAGAGUUGC	176	194	1	17	-8.59
Jr03_22520_p1	JrWRKY23	Jre-miR403a	UGUGGGU	AUUCACG	187	193	5	11	-1.13
Jr03_22520_p1	JrWRKY23	Jre-miR403b	UGUGGGU	AUUCACG	187	193	5	11	-1.13
Jr03_22520_p1	JrWRKY23	Jre-miR477a	UGCCUCACAGCUUUU	AAAGGCUUCCAGCA	247	261	7	20	-4.39
Jr03_22520_p1	JrWRKY23	Jre-miR477b	UGCCUCACAGCUUUU	AAAGGCUUCCAGCA	247	261	7	20	-4.39
Jr03_22520_p1	JrWRKY23	Jre-miR477c	UGCCUCACAGCUUUU	AAAGGCUUCCAGCA	247	261	7	20	-4.39
Jr03_22520_p1	JrWRKY23	Jre-miR477d	UGCCUCACAGCUUUU	AAAGGCUUCCAGCA	247	261	7	20	-4.39
Jr03_22520_p1	JrWRKY23	Jre-miR477e	AGAAGCC	GGCUUCU	79	85	13	19	-8.56
Jr03_22520_p1	JrWRKY23	Jre-miR530a	CAGGUGUUAUAUGUA	UGCAUUUGCACCUG	324	338	1	14	-4.19
Jr03_22520_p1	JrWRKY23	Jre-miR530b	CAGGUGUUAUAUGUA	UGCAUUUGCACCUG	324	338	1	14	-4.19
Jr03_22520_p1	JrWRKY23	Jre-miR530c	CAGGUGUUAUAUGUA	UGCAUUUGCACCUG	324	338	1	14	-4.19
Jr03_22520_p1	JrWRKY23	Jre-miR530d	CAGGUGUUAUAUGUA	UGCAUUUGCACCUG	324	338	1	14	-4.19
Jr03_22520_p1	JrWRKY23	Jre-miR5675a	CUUCAGA	UCUGAGG	470	476	11	17	-8.91
Jr03_22520_p1	JrWRKY23	Jre-miR7972a	GGGGAUCAGAAGCCAGACGA	UUGUCAGGGUUGUGAUUCUC	72	91	1	20	-11.8
Jr03_22520_p1	JrWRKY23	Jre-miRN745a	CUUUUGAUUGUUUAACACUCCA	UGGGUCGUUGCGAUUACGGG	275	296	2	21	-5.63
Jr03_22520_p1	JrWRKY23	Jre-miRN745b	CUUUUGAUUGUUUAACACUCCA	UGGGUCGUUGCGAUUACGGG	275	296	2	21	-5.63
Jr03_22520_p1	JrWRKY23	Jre-miRN745c	CUUUUGAUUGUUUAACACUCCA	UGGGUCGUUGCGAUUACGGG	275	296	2	21	-5.63
Jr03_22520_p1	JrWRKY23	Jre-miRN5866	GUAGGUCGG	CCGAUUUAU	51	59	2	10	-8.51
Jr03_22520_p1	JrWRKY23	Jre-miRN5867	GAGUUCAAGGGGAUC	GAUCCUCGUUUUACUU	64	78	5	20	-7.99
Jr03_22520_p1	JrWRKY23	Jre-miRN5869	CAAGGGGAUCAGAAGCC	GGCGUCUCUUCCUUUG	69	85	2	17	-9.46
Jr03_22520_p1	JrWRKY23	Jre-miRN5871	CCAUGCCCUGAAAACUUC	GAAGGCUUUGGCAUGG	7	24	8	23	-13.39
Jr03_22520_p1	JrWRKY23	Jre-miRN5872	UGGAUCAGUUUU	AAGACUGAACCG	111	122	6	17	-5.17
Jr03_22520_p1	JrWRKY23	Jre-miRN5873	AGCCAGACGAC	GUCUCUGGCU	82	92	13	22	-10.25
Jr03_22520_p1	JrWRKY23	Jre-miRN5874	UUCAAAAUGU	ACGUUUUGAG	423	432	7	16	-6.11
Jr03_22520_p1	JrWRKY23	Jre-miRN5875	GGUCGGGUGAGAGUUCA	UGUGCUCUUGCUCUCC	54	70	3	18	-7.93
Jr03_22520_p1	JrWRKY23	Jre-miRN5876	GACAAAGUAGGUCGGGUGAG	CUUACUCUCUAUCUGUC	45	64	3	19	-6.33
Jr03_22520_p1	JrWRKY23	Jre-miRN5877	UCAGUUUUCCUCUC	GAAGGGAAAACUGA	115	128	1	14	-13
Jr03_22520_p1	JrWRKY23	Jre-miRN5878	CACAUCAGG	CUUGAUGUG	319	327	2	10	-7.14
Jr03_22520_p1	JrWRKY23	Jre-miRN5879	UUCAGAUUU	GAAUCUGAA	471	479	8	16	-8.5
Jr03_22520_p1	JrWRKY23	Jre-miRN5880	UUUAUAC	GUAUAAG	374	380	15	21	-2.17
Jr03_22520_p1	JrWRKY23	Jre-miRN5881	UUCAGAUUU	GAAUCUGAA	471	479	8	16	-8.5
Jr03_22520_p1	JrWRKY23	Jre-miRN5882	GAGAGUUCAAGGGGA	UUUCCUUCAACACUUCUC	62	76	4	21	-5.34
Jr03_22520_p1	JrWRKY23	Jre-miRN5883	CAGUUUUCC	GGGGGACUG	116	124	2	10	-4.55
Jr03_22520_p1	JrWRKY23	Jre-miRN5884	GGUCGGGUGAGAGUUCA	UGAGCGGUUACCUGAGC	54	70	2	18	-9.77
Jr03_22520_p1	JrWRKY23	Jre-miRN5885	UGAAGAC	GUCUUCA	148	154	10	16	-5.76
Jr03_22520_p1	JrWRKY23	Jre-miRN5886	GUUCAAGGGGAUCAGAAGCC	GGCAAUUACACCUUGGGC	66	85	2	19	-6.47
Jr03_22520_p1	JrWRKY23	Jre-miRN5887	AUCACAUAGACG	CGUCUGUAUGAU	401	412	1	12	-6.61
Jr03_22520_p1	JrWRKY23	Jre-miRN5888	GUUGUCACUUAAGCCUA	UAGGUUGACGAU	220	236	1	12	-6.93
Jr03_22520_p1	JrWRKY23	Jre-miRN5889	AUUCUUUAAUUUCUCC	GGCACAGUGAAGAAU	436	451	5	19	-5.64
Jr03_22520_p1	JrWRKY23	Jre-miRN5890	UCAUGACUUCAGA	UCUGAGGAUGA	464	476	1	11	-9.17
Jr03_22520_p1	JrWRKY23	Jre-miRN5891	UUAGAUGGUAGCACAGUUGUCA	UGGCUGCCAUGCAUCGUCUAG	205	226	1	21	-9.05
Jr03_22520_p1	JrWRKY23	Jre-miRN5892	GAGAGUUCAAGGGGAUCA	UGUGCUCUAGCUCUC	62	79	3	17	-6.86
Jr03_22520_p1	JrWRKY23	Jre-miRN5893	AGAAGCC	GGCUUCU	79	85	15	21	-9.49
Jr03_22520_p1	JrWRKY23	Jre-miRN5894	AUGCCCUGAAAACUUCA	UGAUUAUAGAGAGGGCAU	9	25	3	20	-9.58
Jr03_22520_p1	JrWRKY23	Jre-miRN5895	GCCUCACAGCUUUUUACUACAG	UUGUUGGAGAAGCAGGGGC	248	269	3	21	-9.63
Jr03_22520_p1	JrWRKY23	Jre-miRN5896	GCCUCACAGCUUUUUACUACAG	UUGUUGGAGAAGCAGGGGC	248	269	3	21	-9.63
Jr03_22520_p1	JrWRKY23	Jre-miRN5897	GCCUCACAGCUUUUUACUACAG	UUGUUGGAGAAGCAGGGGC	248	269	3	21	-9.63
Jr03_22520_p1	JrWRKY23	Jre-miRN5898	GCCUCACAGCUUUUUACUACAG	UUGUUGGAGAAGCAGGGGC	248	269	3	21	-9.63
Jr03_22520_p1	JrWRKY23	Jre-miRN5899	AGUUUUCCUCUCCUCCA	UGUGGGAUGAGAAGACU	117	133	3	19	-9.37
Jr03_22520_p1	JrWRKY23	Jre-miRN5900	UCAGAAAUGAUGG	CCAUCGUUCUGG	101	113	3	14	-6.14
Jr03_22520_p1	JrWRKY23	Jre-miRN5901	UUCAGCU	GGCUGAA	354	360	14	20	-6.93
Jr03_22520_p1	JrWRKY23	Jre-miRN5904	GGGUAACAAAGAUUAUUAGAU	AUUUAAUAUCGUGUGGCCC	190	210	3	21	-6.49
Jr03_22520_p1	JrWRKY23	Jre-miRN5905	CUCUCCUCCA	UGGGGGAGAG	124	133	9	18	-14.85
Jr03_22520_p1	JrWRKY23	Jre-miRN5906	UGACACC	GGUGUUA	2	8	2	8	-6.36
Jr03_22520_p1	JrWRKY23	Jre-miRN5907	GAGUUCAAGGGGA	UUCCCUUGACCACUU	64	76	1	15	-8.08
Jr03_22520_p1	JrWRKY23	Jre-miRN5908	GUGGGUAACAAAGAUUAUUAGA	UCUCAUGAUCUUUUAACUGGC	188	209	1	21	-7.9
Jr03_22520_p1	JrWRKY23	Jre-miRN5909	GGGGAUCAGA	UCUGAUCCCU	72	81	11	20	-12.61
Jr03_22520_p1	JrWRKY23	Jre-miRN5910	GACUACUUUUCUUUCC	GGGCUAUAGUAGUC	152	167	8	21	-5.35
Jr03_22520_p1	JrWRKY23	Jre-miRN5911	AGUUCAAGGGGAUCAG	CUGCGUACUUGGGCU	65	80	7	21	-4.29
Jr03_22520_p1	JrWRKY23	Jre-miRN5912	UUUCUGCC	GGCAGAAA	243	250	12	19	-9.74
Jr03_27180_p1	JrWRKY26	Jre-miR156a	GCACCCAUCGGAGUCUGUUG	UGACAGAAGAGAGUGAGC	125	144	1	18	-1.18
Jr03_27180_p1	JrWRKY26	Jre-miR156b	UUUUGUU	GACAGAA	65	71	3	9	-1.42
Jr03_27180_p1	JrWRKY26	Jre-miR156c	UUUUGUU	GACAGAA	65	71	3	9	-1.42
Jr03_27180_p1	JrWRKY26	Jre-miR156d	UUUUGUU	GACAGAA	65	71	3	9	-1.42
Jr03_27180_p1	JrWRKY26	Jre-miR156e	UUUUGUU	GACAGAA	65	71	3	9	-1.42
Jr03_27180_p1	JrWRKY26	Jre-miR156f	UUUUGUUGCAUUCAG	UUGACAGAAGACAGAG	65	79	1	16	-2.07
Jr03_27180_p1	JrWRKY26	Jre-miR156g	GCACCCAUCGGAGUCUGUUGA	UUGACAGAAGAGAGAGAGC	125	145	1	19	-2.42
Jr03_27180_p1	JrWRKY26	Jre-miR156h	GCACCCAUCGGAGUCUGUUG	UGACAGAAGAGAGUGAGC	125	144	1	18	-1.18
Jr03_27180_p1	JrWRKY26	Jre-miR156i	GCACCCAUCGGAGUCUGUUG	UGACAGAAGAGAGUGAGC	125	144	1	18	-1.18
Jr03_27180_p1	JrWRKY26	Jre-miR156j	GCACCCAUCGGAGUCUGUUG	UGACAGAAGAGAGUGAGC	125	144	1	18	-1.18
Jr03_27180_p1	JrWRKY26	Jre-miR156k	GCACCCAUCGGAGUCUGUUG	UGACAGAAGAGAGUGAGC	125	144	1	18	-1.18
Jr03_27180_p1	JrWRKY26	Jre-miR156l	GCACCCAUCGGAGUCUGUUG	UGACAGAAGAGAGUGAGC	125	144	1	18	-1.18
Jr03_27180_p1	JrWRKY26	Jre-miR159a	AUUCAGA	UUUGGAU	74	80	1	7	-3.55
Jr03_27180_p1	JrWRKY26	Jre-miR159e	AUUCAGA	UUUGGAU	74	80	1	7	-3.33
Jr03_27180_p1	JrWRKY26	Jre-miR159k	AUUCAGA	UUUGGAU	74	80	1	7	-3.33
Jr03_27180_p1	JrWRKY26	Jre-miR160a	GCAUUCAGAAAAGGC	GCCUGGCUCCCUGAAUGC	72	86	2	19	-9.54
Jr03_27180_p1	JrWRKY26	Jre-miR160b	GCAUUCAGAAAAGGC	GCCUGGCUCCCUGAAUGC	72	86	2	19	-9.54
Jr03_27180_p1	JrWRKY26	Jre-miR165a	GGAGUCUG	CAGGCUUC	134	141	7	14	-3.78
Jr03_27180_p1	JrWRKY26	Jre-miR165b	GGAGUCUG	CAGGCUUC	134	141	7	14	-3.78
Jr03_27180_p1	JrWRKY26	Jre-miR165c	GGAGUCUG	CAGGCUUC	134	141	7	14	-3.78
Jr03_27180_p1	JrWRKY26	Jre-miR165d	GGAGUCUG	CAGGCUUC	134	141	7	14	-3.78
Jr03_27180_p1	JrWRKY26	Jre-miR165e	GGAGUCUG	CAGGCUUC	134	141	7	14	-3.78
Jr03_27180_p1	JrWRKY26	Jre-miR165f	GGAGUCUG	CAGGCUUC	134	141	7	14	-3.78
Jr03_27180_p1	JrWRKY26	Jre-miR165g	GGAGUCUG	CAGGCUUC	134	141	7	14	-3.78
Jr03_27180_p1	JrWRKY26	Jre-miR165h	GGAGUCUG	CAGGCUUC	134	141	7	14	-3.78
Jr03_27180_p1	JrWRKY26	Jre-miR165i	GGAGUCUG	CAGGCUUC	134	141	7	14	-3.78
Jr03_27180_p1	JrWRKY26	Jre-miR165j	GGAGUCUG	CAGGCUUC	134	141	7	14	-3.78
Jr03_27180_p1	JrWRKY26	Jre-miR165k	GGAGUCUG	CAGGCUUC	134	141	7	14	-3.78
Jr03_27180_p1	JrWRKY26	Jre-miR165l	GGAGUCUG	CAGGCUUC	134	141	7	14	-3.78
Jr03_27180_p1	JrWRKY26	Jre-miR165m	GGAGUCUG	CAGGCUUC	134	141	7	14	-3.82
Jr03_27180_p1	JrWRKY26	Jre-miR166a	GGAGUCUGUUGA	UCAGGACCAGGCUUC	134	145	2	16	-4.1
Jr03_27180_p1	JrWRKY26	Jre-miR167d	UAAGAUCGAGAAGAGUA	UGCCAGCAUGAUCUUA	14	30	7	22	-7.22
Jr03_27180_p1	JrWRKY26	Jre-miR167f	UAAGAUCGAGAAGAGUA	UGCCAGCAUGAUCUUA	14	30	7	22	-7.22
Jr03_27180_p1	JrWRKY26	Jre-miR168a	UUGCAUUCAG	CUUGGUGCAG	70	79	4	13	-1.17
Jr03_27180_p1	JrWRKY26	Jre-miR170d	GGAGUCUGUUGAC	GUCAAUAUCUCU	134	146	10	21	-2.51
Jr03_27180_p1	JrWRKY26	Jre-miR170f	GGAGUCUGUUGAC	GUCAAUAUCUCC	134	146	10	21	-4.2
Jr03_27180_p1	JrWRKY26	Jre-miR171a	UUUGUUGCAUUCAGAAAAGGC	GCCCAUCAACGAA	66	86	7	19	-1.79
Jr03_27180_p1	JrWRKY26	Jre-miR172a	AUCGAGA	UCUUGAU	18	24	5	11	-5.9
Jr03_27180_p1	JrWRKY26	Jre-miR172b	AUCGAGA	UCUUGAU	18	24	5	11	-5.85
Jr03_27180_p1	JrWRKY26	Jre-miR172c	AUCGAGA	UCUUGAU	18	24	5	11	-5.9
Jr03_27180_p1	JrWRKY26	Jre-miR172d	AUCGAGA	UCUUGAU	18	24	5	11	-5.9
Jr03_27180_p1	JrWRKY26	Jre-miR172e	AUCGAGA	UCUUGAU	18	24	5	11	-5.85
Jr03_27180_p1	JrWRKY26	Jre-miR172f	AUCGAGA	UCUUGAU	18	24	5	11	-5.9
Jr03_27180_p1	JrWRKY26	Jre-miR393c	AGAUCGAGAAGA	UCGCAUUGAUCU	16	27	11	22	-4.46
Jr03_27180_p1	JrWRKY26	Jre-miR395a	CCAAAACGAACGC	GUGUUUGGGGG	114	126	6	16	-7.5
Jr03_27180_p1	JrWRKY26	Jre-miR395b	CCAAAACGAACGC	GUGUUUGGGGG	114	126	6	16	-7.5
Jr03_27180_p1	JrWRKY26	Jre-miR395c	CCAAAACGAACGC	GUGUUUGGGGG	114	126	6	16	-7.5
Jr03_27180_p1	JrWRKY26	Jre-miR395d	CCAAAACGAACGC	GUGUUUGGGGG	114	126	6	16	-7.5
Jr03_27180_p1	JrWRKY26	Jre-miR395e	CCAAAACGAACGC	GUGUUUGGGGG	114	126	6	16	-7.5
Jr03_27180_p1	JrWRKY26	Jre-miR395f	CCAAAACGAACGC	GUGUUUGGGGG	114	126	6	16	-7.5
Jr03_27180_p1	JrWRKY26	Jre-miR395g	CCAAAACGAACGC	GUGUUUGGGGG	114	126	6	16	-7.5
Jr03_27180_p1	JrWRKY26	Jre-miR395h	CCAAAACGAACGC	GUGUUUGGGGG	114	126	6	16	-7.5
Jr03_27180_p1	JrWRKY26	Jre-miR395i	CCAAAACGAACGC	GUGUUUGGGGG	114	126	6	16	-7.5
Jr03_27180_p1	JrWRKY26	Jre-miR395j	CCAAAACGAACGC	GUGUUUGGGGG	114	126	6	16	-7.5
Jr03_27180_p1	JrWRKY26	Jre-miR396a	AAGAUCGAGAAGAGU	GCUUUCUUGAACUU	15	29	8	21	-8.76
Jr03_27180_p1	JrWRKY26	Jre-miR396b	AGAUCGAGAAGAGU	GCUUUCUUGAACU	16	29	8	20	-8.15
Jr03_27180_p1	JrWRKY26	Jre-miR396c	AGAUCGAGAAGAGU	GCUUUCUUGAACU	16	29	8	20	-8.15
Jr03_27180_p1	JrWRKY26	Jre-miR396d	AGAUCGAGAAGAGU	GCUUUCUUGAACU	16	29	8	20	-8.15
Jr03_27180_p1	JrWRKY26	Jre-miR396e	AAGAUCGAGAAGAGU	GCUUUCUUGAACUU	15	29	8	21	-8.73
Jr03_27180_p1	JrWRKY26	Jre-miR396f	AAGAUCGAGAAGAGU	GCUUUCUUGAACUU	15	29	8	21	-8.73
Jr03_27180_p1	JrWRKY26	Jre-miR397a	UGUUGCAUUCA	UGAGUGCAGCG	68	78	5	15	-10.01
Jr03_27180_p1	JrWRKY26	Jre-miR398a	GAACGCA	UGUGUUC	121	127	1	7	-7.59
Jr03_27180_p1	JrWRKY26	Jre-miR398b	GAACGCA	UGUGUUC	121	127	1	7	-7.59
Jr03_27180_p1	JrWRKY26	Jre-miR398c	GAACGCA	UGUGUUC	121	127	1	7	-7.93
Jr03_27180_p1	JrWRKY26	Jre-miR398d	GAACGCA	UGUGUUC	121	127	1	7	-7.93
Jr03_27180_p1	JrWRKY26	Jre-miR398e	GAACGCA	UGUGUUC	121	127	1	7	-7.93
Jr03_27180_p1	JrWRKY26	Jre-miR398f	UGGCCUGAAAAAUACAUA	UAUGUUCUCAGGUCG	38	55	1	15	-1.06
Jr03_27180_p1	JrWRKY26	Jre-miR482a	UUUUGGG	CCCAAAG	178	184	3	9	-0.16
Jr03_27180_p1	JrWRKY26	Jre-miR482b	UCGGAGUCUGUUGACU	AGCCGCCCAUUCCGA	132	147	8	22	-2.07
Jr03_27180_p1	JrWRKY26	Jre-miR5675a	CCCAUCGGAGUCUGUUGACU	AGCAAUGGAUUCUGAGGG	128	147	1	18	-14.89
Jr03_27180_p1	JrWRKY26	Jre-miRN745a	ACCCGUACGUA	UGCGAUUACGGGU	88	98	10	22	-8.65
Jr03_27180_p1	JrWRKY26	Jre-miRN745b	ACCCGUACGUA	UGCGAUUACGGGU	88	98	10	22	-8.65
Jr03_27180_p1	JrWRKY26	Jre-miRN745c	ACCCGUACGUA	UGCGAUUACGGGU	88	98	10	22	-8.65
Jr03_27180_p1	JrWRKY26	Jre-miRN5866	GUACGUAUAA	UUAUACGAUUAC	92	101	7	18	-5.2
Jr03_27180_p1	JrWRKY26	Jre-miRN5867	AAAACGA	UCGUUUU	116	122	10	16	-4.93
Jr03_27180_p1	JrWRKY26	Jre-miRN5868	AUUCAGA	UCUGAAU	74	80	6	12	-6.34
Jr03_27180_p1	JrWRKY26	Jre-miRN5874	CAAAACGAACGC	GCUGGAACGUUUUG	115	126	1	14	-6.54
Jr03_27180_p1	JrWRKY26	Jre-miRN5875	GAGAAGAGUA	UGCUCUUGCUC	21	30	5	15	-8.78
Jr03_27180_p1	JrWRKY26	Jre-miRN5876	GAUCGAGAAGAGUAA	UUACUCUCUAUCUGUC	17	31	4	19	-9.05
Jr03_27180_p1	JrWRKY26	Jre-miRN5878	UUUUGUUGCAUUCAG	CUUGAUGUGAACCAAAG	65	79	2	18	-2.82
Jr03_27180_p1	JrWRKY26	Jre-miRN5879	AUUCAGAA	UUCUGAAU	74	81	4	11	-7.08
Jr03_27180_p1	JrWRKY26	Jre-miRN5880	AGAGUAAAUACG	CGUGUUUCUCU	25	36	4	14	-7.12
Jr03_27180_p1	JrWRKY26	Jre-miRN5881	AUUCAGAA	UUCUGAAU	74	81	4	11	-7.08
Jr03_27180_p1	JrWRKY26	Jre-miRN5882	AAGGAAA	UUUCCUU	195	201	4	10	-6.68
Jr03_27180_p1	JrWRKY26	Jre-miRN5887	AAGAUCGAGAAGA	UCUGUAUGAUUUU	15	27	3	15	-2.73
Jr03_27180_p1	JrWRKY26	Jre-miRN5888	UGUUGACU	GGUUGACG	140	147	3	10	-1.78
Jr03_27180_p1	JrWRKY26	Jre-miRN5893	GAGAAGAGU	ACUCUUCUC	21	29	1	9	-12.39
Jr03_27180_p1	JrWRKY26	Jre-miRN5899	CUUACAAG	UUUGUGGG	190	197	1	8	-5.91
Jr03_27180_p1	JrWRKY26	Jre-miRN5900	UUUUGUUGCAUUCAGAAAAGGC	GCCAUCGUUCUGGGACAAGA	65	86	2	21	-5.9
Jr03_27180_p1	JrWRKY26	Jre-miRN5904	CCGUACGUAUAAUAAAU	AUUUAAUAUCGUGUGG	90	106	3	18	-7.74
Jr03_27180_p1	JrWRKY26	Jre-miRN5908	AAGAUCGAGA	UCAUGAUCUU	15	24	3	12	-8
Jr03_27180_p1	JrWRKY26	Jre-miRN5909	GUAUAAU	AUUAUAU	96	102	2	8	-2.56
Jr03_27180_p1	JrWRKY26	Jre-miRN5910	AUUACUACCAAAACGAAC	GUAUGUUGGGCUAUAGUAGU	107	124	1	20	-5.29
Jr03_27180_p1	JrWRKY26	Jre-miRN5911	CCCGUACGUA	UGCGUACUUGGG	89	98	8	19	-8.89
Jr03_27180_p1	JrWRKY26	Jre-miRN5912	UUUUGUUGCAUUCAGA	UCUCUCCUUGGCAGAA	65	80	3	18	-0.38
Jr04_00630_p1	JrWRKY27	Jre-miR156a	UUGGCUUUGUUUGUUA	UGACAGAAGAGAGUGAG	77	92	1	17	-4.05
Jr04_00630_p1	JrWRKY27	Jre-miR156b	UUUGUUAA	UUGACAGA	86	93	1	8	-4.12
Jr04_00630_p1	JrWRKY27	Jre-miR156c	UUUGUUAA	UUGACAGA	86	93	1	8	-4.12
Jr04_00630_p1	JrWRKY27	Jre-miR156d	UUUGUUAA	UUGACAGA	86	93	1	8	-4.12
Jr04_00630_p1	JrWRKY27	Jre-miR156e	UUUGUUAA	UUGACAGA	86	93	1	8	-4.12
Jr04_00630_p1	JrWRKY27	Jre-miR156f	CUUUGUUUGUUAA	UUGACAGAAGACAGAG	81	93	1	16	-5.66
Jr04_00630_p1	JrWRKY27	Jre-miR156g	UUUGUUAA	UUGACAGA	86	93	1	8	-4.11
Jr04_00630_p1	JrWRKY27	Jre-miR156h	UUGGCUUUGUUUGUUA	UGACAGAAGAGAGUGAG	77	92	1	17	-4.05
Jr04_00630_p1	JrWRKY27	Jre-miR156i	UUGGCUUUGUUUGUUA	UGACAGAAGAGAGUGAG	77	92	1	17	-4.05
Jr04_00630_p1	JrWRKY27	Jre-miR156j	UUGGCUUUGUUUGUUA	UGACAGAAGAGAGUGAG	77	92	1	17	-4.05
Jr04_00630_p1	JrWRKY27	Jre-miR156k	UUGGCUUUGUUUGUUA	UGACAGAAGAGAGUGAG	77	92	1	17	-4.05
Jr04_00630_p1	JrWRKY27	Jre-miR156l	UUGGCUUUGUUUGUUA	UGACAGAAGAGAGUGAG	77	92	1	17	-4.05
Jr04_00630_p1	JrWRKY27	Jre-miR159a	CGUCUUCCUUGCAAGUUCAGA	UUUGGAUUGAAGGGAGCUG	7	27	1	19	-10.67
Jr04_00630_p1	JrWRKY27	Jre-miR159b	GGGUCCGUCUUCCUUGCAAGUUCAG	UUGGACUGAAGGGAGCUCCC	2	26	1	20	-10.08
Jr04_00630_p1	JrWRKY27	Jre-miR159c	GGGUCCGUCUUCCUUGCAAGUUCAG	UUGGACUGAAGGGAGCUCCC	2	26	1	20	-10.08
Jr04_00630_p1	JrWRKY27	Jre-miR159d	GUCUUCCUUGCAAGUUCA	UGGACUGAAGGGAGC	8	25	3	17	-9
Jr04_00630_p1	JrWRKY27	Jre-miR159e	GUCUUCCUUGCAAGUUCAGA	UUUGGAUUGAAGGGAGC	8	27	1	17	-10.04
Jr04_00630_p1	JrWRKY27	Jre-miR159f	AGCUCUCCCUCC	GGAGUGAAGGGAGCU	137	148	4	18	-8.92
Jr04_00630_p1	JrWRKY27	Jre-miR159g	GGGUCCGUCUUCCUUGCAAGUUCAG	UUGGACUGAAGGGAGCUCCC	2	26	1	20	-10.08
Jr04_00630_p1	JrWRKY27	Jre-miR159h	GGGUCCGUCUUCCUUGCAAGUUCAG	UUGGACUGAAGGGAGCUCCC	2	26	1	20	-10.08
Jr04_00630_p1	JrWRKY27	Jre-miR159i	GGGUCCGUCUUCCUUGCAAGUUCAG	UUGGACUGAAGGGAGCUCCC	2	26	1	20	-10.08
Jr04_00630_p1	JrWRKY27	Jre-miR159j	GGGUCCGUCUUCCUUGCAAGUUCAG	UUGGACUGAAGGGAGCUCCC	2	26	1	20	-10.08
Jr04_00630_p1	JrWRKY27	Jre-miR159k	GUCUUCCUUGCAAGUUCAGA	UUUGGAUUGAAGGGAGC	8	27	1	17	-10.04
Jr04_00630_p1	JrWRKY27	Jre-miR160c	GUGUACA	UGUAUGC	149	155	13	19	-0.05
Jr04_00630_p1	JrWRKY27	Jre-miR160d	GUGUACA	UGUAUGC	149	155	13	19	-0.05
Jr04_00630_p1	JrWRKY27	Jre-miR160e	GUGUACA	UGUAUGC	149	155	13	19	-0.05
Jr04_00630_p1	JrWRKY27	Jre-miR160f	GUGUACA	UGUAUGC	149	155	13	19	-0.05
Jr04_00630_p1	JrWRKY27	Jre-miR162a	GAUGUAGGUAGGU	ACCUCUGCAUC	97	109	8	18	-6.35
Jr04_00630_p1	JrWRKY27	Jre-miR162b	GAUGUAGGUAGGU	ACCUCUGCAUC	97	109	8	18	-6.35
Jr04_00630_p1	JrWRKY27	Jre-miR164a	UGUAUGUAAGGCUUC	GAAGCAGGGCACGUGCA	161	175	5	21	-5.86
Jr04_00630_p1	JrWRKY27	Jre-miR164b	UGUAUGUAAGGCUUC	GAAGCAGGGCACGUGCA	161	175	5	21	-5.86
Jr04_00630_p1	JrWRKY27	Jre-miR164c	UGUAUGUAAGGCUUC	GAAGCAGGGCACGUGCA	161	175	5	21	-5.86
Jr04_00630_p1	JrWRKY27	Jre-miR164d	UGUAUGUAAGGCUUC	GAAGCAGGGCACGUGCA	161	175	5	21	-5.86
Jr04_00630_p1	JrWRKY27	Jre-miR164e	UGUAUGUAAGGCUUC	GAAGCAGGGCACGUGCA	161	175	5	21	-5.86
Jr04_00630_p1	JrWRKY27	Jre-miR165a	AAUGAAGGU	GGCUUCAUU	124	132	9	17	-3.17
Jr04_00630_p1	JrWRKY27	Jre-miR165b	AAUGAAGGU	GGCUUCAUU	124	132	9	17	-3.17
Jr04_00630_p1	JrWRKY27	Jre-miR165c	AAUGAAGGU	GGCUUCAUU	124	132	9	17	-3.17
Jr04_00630_p1	JrWRKY27	Jre-miR165d	AAUGAAGGU	GGCUUCAUU	124	132	9	17	-3.17
Jr04_00630_p1	JrWRKY27	Jre-miR165e	AAUGAAGGU	GGCUUCAUU	124	132	9	17	-3.17
Jr04_00630_p1	JrWRKY27	Jre-miR165f	AAUGAAGGU	GGCUUCAUU	124	132	9	17	-3.17
Jr04_00630_p1	JrWRKY27	Jre-miR165g	AAUGAAGGU	GGCUUCAUU	124	132	9	17	-3.17
Jr04_00630_p1	JrWRKY27	Jre-miR165h	AAUGAAGGU	GGCUUCAUU	124	132	9	17	-3.17
Jr04_00630_p1	JrWRKY27	Jre-miR165i	AAUGAAGGU	GGCUUCAUU	124	132	9	17	-3.17
Jr04_00630_p1	JrWRKY27	Jre-miR165j	AAUGAAGGU	GGCUUCAUU	124	132	9	17	-3.17
Jr04_00630_p1	JrWRKY27	Jre-miR165k	AAUGAAGGU	GGCUUCAUU	124	132	9	17	-3.17
Jr04_00630_p1	JrWRKY27	Jre-miR165l	AAUGAAGGU	GGCUUCAUU	124	132	9	17	-3.17
Jr04_00630_p1	JrWRKY27	Jre-miR165m	AAUGAAGGUAGCUAGCUCUCCCUCCG	CGGACCAGGCUUCAUU	124	149	2	17	-3.25
Jr04_00630_p1	JrWRKY27	Jre-miR166a	AAUGAAGGU	GGCUUCAUU	124	132	11	19	-3.53
Jr04_00630_p1	JrWRKY27	Jre-miR167a	AUGAAGGUAGCU	AGCUGCCAGCAU	125	136	4	15	-8.95
Jr04_00630_p1	JrWRKY27	Jre-miR167b	AUGAAGGUAGCU	AGCUGCCAGCAU	125	136	4	15	-8.95
Jr04_00630_p1	JrWRKY27	Jre-miR167c	AUGAAGGUAGCU	AGCUGCCAGCAU	125	136	4	15	-8.95
Jr04_00630_p1	JrWRKY27	Jre-miR167d	AUGAAGGUAGCU	AGCUGCCAGCAU	125	136	4	15	-8.94
Jr04_00630_p1	JrWRKY27	Jre-miR167e	AUGAAGGUAGCU	AGCUGCCAGCAU	125	136	4	15	-8.95
Jr04_00630_p1	JrWRKY27	Jre-miR167f	AUGAAGGUAGCU	AGCUGCCAGCAU	125	136	4	15	-8.94
Jr04_00630_p1	JrWRKY27	Jre-miR167g	CAAAUUAUGUAUGUAAGGCUUC	GAAGCUGCCAGCAUGAUCUG	154	175	2	21	-9
Jr04_00630_p1	JrWRKY27	Jre-miR167h	CAAAUUAUGUAUGUAAGGCUUC	GAAGCUGCCAGCAUGAUCUG	154	175	2	21	-9
Jr04_00630_p1	JrWRKY27	Jre-miR169a	GCAAGUU	GACUUGC	17	23	12	18	-2.67
Jr04_00630_p1	JrWRKY27	Jre-miR169b	GCAAGUU	GACUUGC	17	23	12	18	-2.67
Jr04_00630_p1	JrWRKY27	Jre-miR169c	GCAAGUU	GACUUGC	17	23	12	18	-2.67
Jr04_00630_p1	JrWRKY27	Jre-miR169d	GCAAGUU	GACUUGC	17	23	12	18	-2.67
Jr04_00630_p1	JrWRKY27	Jre-miR169e	GCAAGUU	GACUUGC	17	23	12	18	-2.67
Jr04_00630_p1	JrWRKY27	Jre-miR169f	GCAAGUU	GACUUGC	17	23	12	18	-2.67
Jr04_00630_p1	JrWRKY27	Jre-miR169g	GCAAGUU	GACUUGC	17	23	12	18	-2.67
Jr04_00630_p1	JrWRKY27	Jre-miR169h	GGCUUCGUUUGG	CCAAGGAUGAAUUGCC	170	181	4	19	-4.41
Jr04_00630_p1	JrWRKY27	Jre-miR169i	GCAAGUU	GACUUGC	17	23	12	18	-2.75
Jr04_00630_p1	JrWRKY27	Jre-miR169j	GCAAGUU	GACUUGC	17	23	12	18	-2.75
Jr04_00630_p1	JrWRKY27	Jre-miR169k	GCAAGUU	GACUUGC	17	23	12	18	-2.75
Jr04_00630_p1	JrWRKY27	Jre-miR170n	UUUGGCUU	GAGCCGAA	76	83	2	9	-4.79
Jr04_00630_p1	JrWRKY27	Jre-miR171a	GUUUGUUAAAUAGAUGUAGGUAGGUA	UAGAUGCCCAUCAACGAAC	85	110	2	20	-2.1
Jr04_00630_p1	JrWRKY27	Jre-miR2111a	GAUGUAGGU	AUCUGCAUC	97	105	3	11	-3.44
Jr04_00630_p1	JrWRKY27	Jre-miR2111b	GAUGUAGGU	AUCUGCAUC	97	105	3	11	-3.44
Jr04_00630_p1	JrWRKY27	Jre-miR390a	GCUCUCCCUCC	GGAGGGAUAGC	138	148	8	18	-14.55
Jr04_00630_p1	JrWRKY27	Jre-miR390b	GCUCUCCCUCC	GGAGGGAUAGC	138	148	8	18	-14.55
Jr04_00630_p1	JrWRKY27	Jre-miR390c	GCUCUCCCUCC	GGAGGGAUAGC	138	148	8	18	-14.79
Jr04_00630_p1	JrWRKY27	Jre-miR395a	GUCUUCCUUGCAAGUUCAG	CUGAAGUGUUUGGGGGAAC	8	26	1	19	-6.44
Jr04_00630_p1	JrWRKY27	Jre-miR395b	GUCUUCCUUGCAAGUUCAG	CUGAAGUGUUUGGGGGAAC	8	26	1	19	-6.44
Jr04_00630_p1	JrWRKY27	Jre-miR395c	GUCUUCCUUGCAAGUUCAG	CUGAAGUGUUUGGGGGAAC	8	26	1	19	-6.44
Jr04_00630_p1	JrWRKY27	Jre-miR395d	GUCUUCCUUGCAAGUUCAG	CUGAAGUGUUUGGGGGAAC	8	26	1	19	-6.44
Jr04_00630_p1	JrWRKY27	Jre-miR395e	GUCUUCCUUGCAAGUUCAG	CUGAAGUGUUUGGGGGAAC	8	26	1	19	-6.44
Jr04_00630_p1	JrWRKY27	Jre-miR395f	GUCUUCCUUGCAAGUUCAG	CUGAAGUGUUUGGGGGAAC	8	26	1	19	-6.44
Jr04_00630_p1	JrWRKY27	Jre-miR395g	GUCUUCCUUGCAAGUUCAG	CUGAAGUGUUUGGGGGAAC	8	26	1	19	-6.44
Jr04_00630_p1	JrWRKY27	Jre-miR395h	GUCUUCCUUGCAAGUUCAG	CUGAAGUGUUUGGGGGAAC	8	26	1	19	-6.44
Jr04_00630_p1	JrWRKY27	Jre-miR395i	GUCUUCCUUGCAAGUUCAG	CUGAAGUGUUUGGGGGAAC	8	26	1	19	-6.44
Jr04_00630_p1	JrWRKY27	Jre-miR395j	GUCUUCCUUGCAAGUUCAG	CUGAAGUGUUUGGGGGAAC	8	26	1	19	-6.44
Jr04_00630_p1	JrWRKY27	Jre-miR396a	AAGUUCAGAAAG	CUUUCUUGAACUU	19	30	9	21	-9.94
Jr04_00630_p1	JrWRKY27	Jre-miR396b	AGUUCAGAAAG	CUUUCUUGAACU	20	30	9	20	-6.61
Jr04_00630_p1	JrWRKY27	Jre-miR396c	AGUUCAGAAAG	CUUUCUUGAACU	20	30	9	20	-6.61
Jr04_00630_p1	JrWRKY27	Jre-miR396d	AGUUCAGAAAG	CUUUCUUGAACU	20	30	9	20	-6.61
Jr04_00630_p1	JrWRKY27	Jre-miR396e	AAGUUCAGAAAG	CUUUCUUGAACUU	19	30	9	21	-9.91
Jr04_00630_p1	JrWRKY27	Jre-miR396f	AAGUUCAGAAAG	CUUUCUUGAACUU	19	30	9	21	-9.91
Jr04_00630_p1	JrWRKY27	Jre-miR397a	UGUAUUC	GAGUGCA	35	41	6	12	-2.48
Jr04_00630_p1	JrWRKY27	Jre-miR399c	AAGGUAGCUAGCUCUCCCUCCGUG	CGCCAAAGGAGAGUUGCCCUU	128	151	1	21	-11.28
Jr04_00630_p1	JrWRKY27	Jre-miR399d	AAGGUAGCUAGCUCUCCCUCCGUG	CGCCAAAGGAGAGUUGCCCUU	128	151	1	21	-11.28
Jr04_00630_p1	JrWRKY27	Jre-miR399e	AGGUAGCUAGCUCUCC	GGAGAGUUGCCCU	129	144	8	20	-10.72
Jr04_00630_p1	JrWRKY27	Jre-miR399f	AGGUAGCUAGCUCUCC	GGAGAGUUGCCCU	129	144	8	20	-10.72
Jr04_00630_p1	JrWRKY27	Jre-miR482a	UGGCUUUG	CAAAGCCG	78	85	5	12	-5.82
Jr04_00630_p1	JrWRKY27	Jre-miR482b	UGGCUUUG	CAAAGCCG	78	85	5	12	-5.76
Jr04_00630_p1	JrWRKY27	Jre-miR530a	AUAGAUGUAGGU	ACCUGCACCUAU	94	105	10	21	-4.62
Jr04_00630_p1	JrWRKY27	Jre-miR530b	GUUCAGAAAGAAAAUGUA	UGCAUUUGCACCUGCAC	21	38	1	17	-3.13
Jr04_00630_p1	JrWRKY27	Jre-miR530c	GUUCAGAAAGAAAAUGUA	UGCAUUUGCACCUGCAC	21	38	1	17	-3.13
Jr04_00630_p1	JrWRKY27	Jre-miR530d	GUUCAGAAAGAAAAUGUA	UGCAUUUGCACCUGCAC	21	38	1	17	-3.13
Jr04_00630_p1	JrWRKY27	Jre-miR5675a	AUUCCUC	GAGGGAU	189	195	14	20	-7.06
Jr04_00630_p1	JrWRKY27	Jre-miR7972a	GGAACCACAAUUC	GGGUUGUGAUUCU	180	192	7	19	-6.55
Jr04_00630_p1	JrWRKY27	Jre-miRN5866	AAAUGUA	UACAUUU	32	38	16	22	-3.23
Jr04_00630_p1	JrWRKY27	Jre-miRN5867	AAAAUGAAGGUAGCUA	UAGAGAUCCUCGUUUU	122	137	1	16	-4.8
Jr04_00630_p1	JrWRKY27	Jre-miRN5868	GUUCAGAAAGAA	UUCCUCUGAAU	21	32	2	12	-5.62
Jr04_00630_p1	JrWRKY27	Jre-miRN5869	CUUGCAAGUUCAGAAAGAAAAUGU	GCGUCUCUUCCUUUGCAAG	14	37	3	21	-7.03
Jr04_00630_p1	JrWRKY27	Jre-miRN5871	GUCCGUCUUCC	GGAAGGCUUUGGC	4	14	7	19	-9.94
Jr04_00630_p1	JrWRKY27	Jre-miRN5872	UCCGUCUUCCUUGCAA	UUGCAAGACUGAACCGGA	5	20	2	19	-10.55
Jr04_00630_p1	JrWRKY27	Jre-miRN5873	UAGAUGUAGGUAGGUAUAG	UUGUACCAACUGUCUCUG	95	113	2	19	-3.49
Jr04_00630_p1	JrWRKY27	Jre-miRN5874	UUCCUUGCAAGUUCAG	CUGGAACGUUUUGAGGGA	11	26	2	19	-5.51
Jr04_00630_p1	JrWRKY27	Jre-miRN5876	AUAGAUGUAGGUAGGUA	UGCUUACUCUCUAUCUGU	94	110	1	18	-8.24
Jr04_00630_p1	JrWRKY27	Jre-miRN5877	UUCCUUGCAAGUUC	GAAAACUGAGGAG	11	24	6	18	-3.28
Jr04_00630_p1	JrWRKY27	Jre-miRN5878	UUGGCUUUGUUUGUUAA	UUGAUGUGAACCAAAGCCAA	77	93	3	22	-6.81
Jr04_00630_p1	JrWRKY27	Jre-miRN5879	AGGCUUCGUUUGGAAC	GUUCUGAAUCUGAAAGCCU	169	184	3	21	-9.57
Jr04_00630_p1	JrWRKY27	Jre-miRN5881	AGGCUUCGUUUGGAAC	GUUCUGAAUCUGAAAGCCU	169	184	3	21	-9.57
Jr04_00630_p1	JrWRKY27	Jre-miRN5882	GAAGGUA	UACUUUC	127	133	1	7	-2.78
Jr04_00630_p1	JrWRKY27	Jre-miRN5883	CGGGUCCGUCUUCC	GGGGGACUGCUCG	1	14	2	14	-9.92
Jr04_00630_p1	JrWRKY27	Jre-miRN5884	AGGUAGCUAGCUC	GAGCGGUUACCU	129	141	3	14	-10.5
Jr04_00630_p1	JrWRKY27	Jre-miRN5886	UGUCCAA	UUGGGCA	53	59	14	20	-5.49
Jr04_00630_p1	JrWRKY27	Jre-miRN5887	GGCUUUGUUUGUUAAAUAGAUG	CGUCUGUAUGAUUUUUAUGCC	79	100	1	21	-3.23
Jr04_00630_p1	JrWRKY27	Jre-miRN5888	UCCUACAUC	GAUGUAGGA	40	48	10	18	-7.24
Jr04_00630_p1	JrWRKY27	Jre-miRN5889	CUUCGUUUGGAACCA	UGGCACAGUGAAG	172	186	4	16	-0.75
Jr04_00630_p1	JrWRKY27	Jre-miRN5890	CGUCUUC	GAGGAUG	7	13	4	10	-7.34
Jr04_00630_p1	JrWRKY27	Jre-miRN5891	GGUAGCUA	UGGCUGCC	130	137	1	8	-6.64
Jr04_00630_p1	JrWRKY27	Jre-miRN5894	UCCUCUC	GAGAGGG	191	197	11	17	-8.9
Jr04_00630_p1	JrWRKY27	Jre-miRN5895	UCCUUGCAAGUUCAGAAAGA	UUUUGUUGGAGAAGCAGGGG	12	31	1	20	-7.59
Jr04_00630_p1	JrWRKY27	Jre-miRN5896	UCCUUGCAAGUUCAGAAAGA	UUUUGUUGGAGAAGCAGGGG	12	31	1	20	-7.59
Jr04_00630_p1	JrWRKY27	Jre-miRN5897	UCCUUGCAAGUUCAGAAAGA	UUUUGUUGGAGAAGCAGGGG	12	31	1	20	-7.59
Jr04_00630_p1	JrWRKY27	Jre-miRN5898	UCCUUGCAAGUUCAGAAAGA	UUUUGUUGGAGAAGCAGGGG	12	31	1	20	-7.59
Jr04_00630_p1	JrWRKY27	Jre-miRN5899	GUCUUCCUUGCAA	UUGUGGGAUGAGAAGAC	8	20	2	18	-8.37
Jr04_00630_p1	JrWRKY27	Jre-miRN5900	CUUGCAAGUUCAGAAAGA	UCGUUCUGGGACAAG	14	31	6	20	-3.54
Jr04_00630_p1	JrWRKY27	Jre-miRN5901	UUUGGCU	GGCUGAA	76	82	14	20	-0.4
Jr04_00630_p1	JrWRKY27	Jre-miRN5904	GGCUUUGUUUGUUAAAU	AUUUAAUAUCGUGUGGCC	79	95	3	20	-4.19
Jr04_00630_p1	JrWRKY27	Jre-miRN5905	GCUCUCCCUC	GGGGGAGAGU	138	147	10	19	-13.5
Jr04_00630_p1	JrWRKY27	Jre-miRN5907	AAUGAAG	CUUCAUU	124	130	13	19	-2.36
Jr04_00630_p1	JrWRKY27	Jre-miRN5909	CAAAUUAUGUA	UAUAUAAUCUG	154	164	4	14	-2.78
Jr04_00630_p1	JrWRKY27	Jre-miRN5910	GGUAUAGCCUA	UGGGCUAUAGU	107	117	7	17	-6.98
Jr04_00630_p1	JrWRKY27	Jre-miRN5911	GUUAAAUAGAUGUAGGUAGGUA	UACUUCCUGCGUACUUGGGC	89	110	1	20	-4.97
Jr04_00630_p1	JrWRKY27	Jre-miRN5912	UUUGUUAAAUAGAUG	CAUCUCUCCUUGGCAGA	86	100	1	17	-3.71
Jr04_03880_p1	JrWRKY31	Jre-miR156a	UCAUUUUUCUC	GAAGAGAGUGA	64	74	6	16	-5.4
Jr04_03880_p1	JrWRKY31	Jre-miR156b	CUCUAUC	GAUAGAG	291	297	10	16	-10.09
Jr04_03880_p1	JrWRKY31	Jre-miR156c	CUCUAUC	GAUAGAG	291	297	10	16	-10.09
Jr04_03880_p1	JrWRKY31	Jre-miR156d	CUCUAUC	GAUAGAG	291	297	10	16	-10.09
Jr04_03880_p1	JrWRKY31	Jre-miR156e	CUCUAUC	GAUAGAG	291	297	10	16	-10.09
Jr04_03880_p1	JrWRKY31	Jre-miR156g	UUUUUCUC	GAGAGAGA	67	74	10	17	-6.56
Jr04_03880_p1	JrWRKY31	Jre-miR156h	UCAUUUUUCUC	GAAGAGAGUGA	64	74	6	16	-5.4
Jr04_03880_p1	JrWRKY31	Jre-miR156i	UCAUUUUUCUC	GAAGAGAGUGA	64	74	6	16	-5.4
Jr04_03880_p1	JrWRKY31	Jre-miR156j	UCAUUUUUCUC	GAAGAGAGUGA	64	74	6	16	-5.4
Jr04_03880_p1	JrWRKY31	Jre-miR156k	UCAUUUUUCUC	GAAGAGAGUGA	64	74	6	16	-5.4
Jr04_03880_p1	JrWRKY31	Jre-miR156l	UCAUUUUUCUC	GAAGAGAGUGA	64	74	6	16	-5.4
Jr04_03880_p1	JrWRKY31	Jre-miR159a	UUUCAGUGCA	UGGAUUGAAG	338	347	3	12	-6.49
Jr04_03880_p1	JrWRKY31	Jre-miR159b	UUUCAGUGCA	UGGACUGAAG	338	347	2	11	-5.94
Jr04_03880_p1	JrWRKY31	Jre-miR159c	UUUCAGUGCA	UGGACUGAAG	338	347	2	11	-5.94
Jr04_03880_p1	JrWRKY31	Jre-miR159d	UUUCAGUGCA	UGGACUGAAG	338	347	3	12	-6.72
Jr04_03880_p1	JrWRKY31	Jre-miR159e	UAGAGUAAAAAUGAUCCA	UGGAUUGAAGGGAGCUCUA	229	246	3	21	-7.86
Jr04_03880_p1	JrWRKY31	Jre-miR159f	UCUGGCUUCUAAUGCCC	GGAGUGAAGGGAGCUCGA	269	285	4	21	-3.2
Jr04_03880_p1	JrWRKY31	Jre-miR159g	UUUCAGUGCA	UGGACUGAAG	338	347	2	11	-5.94
Jr04_03880_p1	JrWRKY31	Jre-miR159h	UUUCAGUGCA	UGGACUGAAG	338	347	2	11	-5.94
Jr04_03880_p1	JrWRKY31	Jre-miR159i	UUUCAGUGCA	UGGACUGAAG	338	347	2	11	-5.94
Jr04_03880_p1	JrWRKY31	Jre-miR159j	UUUCAGUGCA	UGGACUGAAG	338	347	2	11	-5.94
Jr04_03880_p1	JrWRKY31	Jre-miR159k	UAGAGUAAAAAUGAUCCA	UGGAUUGAAGGGAGCUCUA	229	246	3	21	-7.86
Jr04_03880_p1	JrWRKY31	Jre-miR165a	GGUGAAG	CUUCAUU	120	126	11	17	-4.6
Jr04_03880_p1	JrWRKY31	Jre-miR165b	GGUGAAG	CUUCAUU	120	126	11	17	-4.6
Jr04_03880_p1	JrWRKY31	Jre-miR165c	GGUGAAG	CUUCAUU	120	126	11	17	-4.6
Jr04_03880_p1	JrWRKY31	Jre-miR165d	GGUGAAG	CUUCAUU	120	126	11	17	-4.6
Jr04_03880_p1	JrWRKY31	Jre-miR165e	GGUGAAG	CUUCAUU	120	126	11	17	-4.6
Jr04_03880_p1	JrWRKY31	Jre-miR165f	GGUGAAG	CUUCAUU	120	126	11	17	-4.6
Jr04_03880_p1	JrWRKY31	Jre-miR165g	GGUGAAG	CUUCAUU	120	126	11	17	-4.6
Jr04_03880_p1	JrWRKY31	Jre-miR165h	GGUGAAG	CUUCAUU	120	126	11	17	-4.6
Jr04_03880_p1	JrWRKY31	Jre-miR165i	GGUGAAG	CUUCAUU	120	126	11	17	-4.6
Jr04_03880_p1	JrWRKY31	Jre-miR165j	GGUGAAG	CUUCAUU	120	126	11	17	-4.6
Jr04_03880_p1	JrWRKY31	Jre-miR165k	GGUGAAG	CUUCAUU	120	126	11	17	-4.6
Jr04_03880_p1	JrWRKY31	Jre-miR165l	GGUGAAG	CUUCAUU	120	126	11	17	-4.6
Jr04_03880_p1	JrWRKY31	Jre-miR165m	GGUGAAG	CUUCAUU	120	126	11	17	-4.63
Jr04_03880_p1	JrWRKY31	Jre-miR166a	GGUGAAG	CUUCAUU	120	126	13	19	-5
Jr04_03880_p1	JrWRKY31	Jre-miR167a	GUCAUCUGGCUUC	GAAGCUGCCAGCAUGAU	265	277	2	18	-2.7
Jr04_03880_p1	JrWRKY31	Jre-miR167b	GUCAUCUGGCUUC	GAAGCUGCCAGCAUGAU	265	277	2	18	-2.7
Jr04_03880_p1	JrWRKY31	Jre-miR167c	GUCAUCUGGCUUC	GAAGCUGCCAGCAUGAU	265	277	2	18	-2.7
Jr04_03880_p1	JrWRKY31	Jre-miR167d	AAGAUCA	UGAUCUU	1	7	15	21	-7.09
Jr04_03880_p1	JrWRKY31	Jre-miR167e	GUCAUCUGGCUUC	GAAGCUGCCAGCAUGAU	265	277	2	18	-2.7
Jr04_03880_p1	JrWRKY31	Jre-miR167f	AAGAUCA	UGAUCUU	1	7	15	21	-7.09
Jr04_03880_p1	JrWRKY31	Jre-miR167g	UAGAUUA	UGAUCUG	41	47	15	21	-3.55
Jr04_03880_p1	JrWRKY31	Jre-miR167h	UAGAUUA	UGAUCUG	41	47	15	21	-3.55
Jr04_03880_p1	JrWRKY31	Jre-miR169a	UAAGUCAUCUGGCU	AGCCAAGGAUGACUUG	262	275	2	17	-8.52
Jr04_03880_p1	JrWRKY31	Jre-miR169b	UAAGUCAUCUGGCU	AGCCAAGGAUGACUUG	262	275	2	17	-8.52
Jr04_03880_p1	JrWRKY31	Jre-miR169c	UAAGUCAUCUGGCU	AGCCAAGGAUGACUUG	262	275	2	17	-8.52
Jr04_03880_p1	JrWRKY31	Jre-miR169d	UAAGUCAUCUGGCU	AGCCAAGGAUGACUUG	262	275	2	17	-8.52
Jr04_03880_p1	JrWRKY31	Jre-miR169e	UAAGUCAUCUGGCU	AGCCAAGGAUGACUUG	262	275	2	17	-8.52
Jr04_03880_p1	JrWRKY31	Jre-miR169f	UAAGUCAUCUGGCU	AGCCAAGGAUGACUUG	262	275	2	17	-8.52
Jr04_03880_p1	JrWRKY31	Jre-miR169g	UAAGUCAUCUGGCU	AGCCAAGGAUGACUUG	262	275	2	17	-8.52
Jr04_03880_p1	JrWRKY31	Jre-miR169h	GUCUUUGGU	GCCAAGGAU	203	211	3	11	-6.15
Jr04_03880_p1	JrWRKY31	Jre-miR169i	UAAGUCAUCUGGCU	AGCCAAGGAUGACUUG	262	275	2	17	-8.62
Jr04_03880_p1	JrWRKY31	Jre-miR169j	UAAGUCAUCUGGCU	AGCCAAGGAUGACUUG	262	275	2	17	-8.62
Jr04_03880_p1	JrWRKY31	Jre-miR169k	UAAGUCAUCUGGCU	AGCCAAGGAUGACUUG	262	275	2	17	-8.62
Jr04_03880_p1	JrWRKY31	Jre-miR170a	AGUGUGCGGCUAGUG	UAUUGGCCUGGUUCACU	81	95	1	17	-5.33
Jr04_03880_p1	JrWRKY31	Jre-miR170b	AGUGUGCGGCUAGUG	UAUUGGCCUGGUUCACU	81	95	1	17	-5.33
Jr04_03880_p1	JrWRKY31	Jre-miR170c	GUGUGCGGCU	AGCCGCGCC	82	91	4	12	-8.72
Jr04_03880_p1	JrWRKY31	Jre-miR170d	UGUGCGGCU	AGCCGCGUCA	83	91	4	13	-6.08
Jr04_03880_p1	JrWRKY31	Jre-miR170e	GUGUGCGGCU	AGCCGCGCC	82	91	4	12	-8.72
Jr04_03880_p1	JrWRKY31	Jre-miR170f	UGUGCGGCU	AGCCGCGUCA	83	91	4	13	-6.1
Jr04_03880_p1	JrWRKY31	Jre-miR170g	GCACGGU	GCCGUGC	116	122	8	14	-7.55
Jr04_03880_p1	JrWRKY31	Jre-miR170h	GCACGGU	GCCGUGC	116	122	8	14	-7.55
Jr04_03880_p1	JrWRKY31	Jre-miR170i	GCACGGU	GCCGUGC	116	122	8	14	-7.55
Jr04_03880_p1	JrWRKY31	Jre-miR170j	GCACGGU	GCCGUGC	116	122	8	14	-7.55
Jr04_03880_p1	JrWRKY31	Jre-miR170k	GCACGGU	GCCGUGC	116	122	8	14	-7.55
Jr04_03880_p1	JrWRKY31	Jre-miR170l	GCACGGU	GCCGUGC	116	122	8	14	-7.55
Jr04_03880_p1	JrWRKY31	Jre-miR170m	GCACGGU	GCCGUGC	116	122	8	14	-7.55
Jr04_03880_p1	JrWRKY31	Jre-miR171a	GUCAUCUGG	UUAGAUGC	265	273	1	8	-0.77
Jr04_03880_p1	JrWRKY31	Jre-miR172a	CAUCGUCAUUUUUCU	AGAAUCUUGAUGAUG	59	73	1	15	-8.78
Jr04_03880_p1	JrWRKY31	Jre-miR172b	CAUCGUCAUUUUUCU	GGAAUCUUGAUGAUG	59	73	1	15	-8.72
Jr04_03880_p1	JrWRKY31	Jre-miR172c	CAUCGUCAUUUUUCU	AGAAUCUUGAUGAUG	59	73	1	15	-8.78
Jr04_03880_p1	JrWRKY31	Jre-miR172d	CAUCGUCAUUUUUCU	AGAAUCUUGAUGAUG	59	73	1	15	-8.78
Jr04_03880_p1	JrWRKY31	Jre-miR172e	CAUCGUCAUUUUUCU	GGAAUCUUGAUGAUG	59	73	1	15	-8.72
Jr04_03880_p1	JrWRKY31	Jre-miR172f	CAUCGUCAUUUUUCU	AGAAUCUUGAUGAUG	59	73	1	15	-8.78
Jr04_03880_p1	JrWRKY31	Jre-miR2111a	AGAUUUCAGUGCA	UGCAUCCUGAGGUUU	335	347	6	20	-7.92
Jr04_03880_p1	JrWRKY31	Jre-miR2111b	AGAUUUCAGUGCA	UGCAUCCUGAGGUUU	335	347	6	20	-7.92
Jr04_03880_p1	JrWRKY31	Jre-miR390a	CUGAGCU	AGCUCAG	164	170	2	8	-8.58
Jr04_03880_p1	JrWRKY31	Jre-miR390b	CUGAGCU	AGCUCAG	164	170	2	8	-8.58
Jr04_03880_p1	JrWRKY31	Jre-miR390c	CUGAGCU	AGCUCAG	164	170	2	8	-8.69
Jr04_03880_p1	JrWRKY31	Jre-miR393a	UCAGUGC	GCAUUGA	340	346	13	19	-8.09
Jr04_03880_p1	JrWRKY31	Jre-miR393b	UCAGUGC	GCAUUGA	340	346	13	19	-8.09
Jr04_03880_p1	JrWRKY31	Jre-miR393c	UCAGUGC	GCAUUGA	340	346	13	19	-6.47
Jr04_03880_p1	JrWRKY31	Jre-miR394a	ACAGAGU	AUUCUGU	198	204	6	12	-2.58
Jr04_03880_p1	JrWRKY31	Jre-miR394b	ACAGAGU	AUUCUGU	198	204	6	12	-2.58
Jr04_03880_p1	JrWRKY31	Jre-miR394c	ACAGAGU	AUUCUGU	198	204	6	12	-2.58
Jr04_03880_p1	JrWRKY31	Jre-miR394d	ACAGAGU	AUUCUGU	198	204	6	12	-2.58
Jr04_03880_p1	JrWRKY31	Jre-miR395a	CCCUUAACCUCUAUCA	UGAAGUGUUUGGGGG	283	298	2	16	-9.44
Jr04_03880_p1	JrWRKY31	Jre-miR395b	CCCUUAACCUCUAUCA	UGAAGUGUUUGGGGG	283	298	2	16	-9.44
Jr04_03880_p1	JrWRKY31	Jre-miR395c	CCCUUAACCUCUAUCA	UGAAGUGUUUGGGGG	283	298	2	16	-9.44
Jr04_03880_p1	JrWRKY31	Jre-miR395d	CCCUUAACCUCUAUCA	UGAAGUGUUUGGGGG	283	298	2	16	-9.44
Jr04_03880_p1	JrWRKY31	Jre-miR395e	CCCUUAACCUCUAUCA	UGAAGUGUUUGGGGG	283	298	2	16	-9.44
Jr04_03880_p1	JrWRKY31	Jre-miR395f	CCCUUAACCUCUAUCA	UGAAGUGUUUGGGGG	283	298	2	16	-9.44
Jr04_03880_p1	JrWRKY31	Jre-miR395g	CCCUUAACCUCUAUCA	UGAAGUGUUUGGGGG	283	298	2	16	-9.44
Jr04_03880_p1	JrWRKY31	Jre-miR395h	CCCUUAACCUCUAUCA	UGAAGUGUUUGGGGG	283	298	2	16	-9.44
Jr04_03880_p1	JrWRKY31	Jre-miR395i	CCCUUAACCUCUAUCA	UGAAGUGUUUGGGGG	283	298	2	16	-9.44
Jr04_03880_p1	JrWRKY31	Jre-miR395j	CCCUUAACCUCUAUCA	UGAAGUGUUUGGGGG	283	298	2	16	-9.44
Jr04_03880_p1	JrWRKY31	Jre-miR396a	AAGAUCAAGAA	UUCUUGAACUU	1	11	11	21	-7.27
[truncated: 4,448 more rows]
