# Supplementary material for: Genome-Wide Identification and Transcriptional Expression Profiles of Transcription Factor WRKY in Common Walnut (Juglans regia L.)
Source: Genes (Basel). 2021 Sep 19;12(9):1444. doi: 10.3390/genes12091444 (PMC8466090; doi:10.3390/genes12091444)
Supplement: Supplementary file 1 [file genes-12-01444-s001.zip › TableS15.xlsx]

## Sheet: Sheet1
TableS15. The regulatory network relatiionships between putative miRNAs and JrWRKY73.
FromNode	ToNode	Weight	Direction
JrWRKY73	Jre-miR156a	0.0207353	directed
JrWRKY73	Jre-miR156b	0.0267329	directed
JrWRKY73	Jre-miR156c	0.0214513	directed
JrWRKY73	Jre-miR156d	0.0723654	directed
JrWRKY73	Jre-miR156e	0.100236	directed
JrWRKY73	Jre-miR156f	0.0304891	directed
JrWRKY73	Jre-miR156g	0.0654816	directed
JrWRKY73	Jre-miR156h	0.0312013	directed
JrWRKY73	Jre-miR156i	0.0439423	directed
JrWRKY73	Jre-miR156j	0.0518229	directed
JrWRKY73	Jre-miR156k	0.0659658	directed
JrWRKY73	Jre-miR156l	0.0402787	directed
JrWRKY73	Jre-miR165a	0.0483773	directed
JrWRKY73	Jre-miR165b	0.0333451	directed
JrWRKY73	Jre-miR165c	0.0424057	directed
JrWRKY73	Jre-miR165d	0.0462787	directed
JrWRKY73	Jre-miR165e	0.0226852	directed
JrWRKY73	Jre-miR165f	0.0231937	directed
JrWRKY73	Jre-miR165g	0.0209255	directed
JrWRKY73	Jre-miR165h	0.0352103	directed
JrWRKY73	Jre-miR165i	0.0404467	directed
JrWRKY73	Jre-miR165j	0.0234867	directed
JrWRKY73	Jre-miR165k	0.0205229	directed
JrWRKY73	Jre-miR165l	0.0212011	directed
JrWRKY73	Jre-miR165m	0.0330321	directed
JrWRKY73	Jre-miR166a	0.0296778	directed
JrWRKY73	Jre-miR167a	0.0215654	directed
JrWRKY73	Jre-miR167b	0.0200662	directed
JrWRKY73	Jre-miR167c	0.0220772	directed
JrWRKY73	Jre-miR167d	0.0224883	directed
JrWRKY73	Jre-miR167e	0.0263125	directed
JrWRKY73	Jre-miR167f	0.0333523	directed
JrWRKY73	Jre-miR167g	0.0236049	directed
JrWRKY73	Jre-miR167h	0.023333	directed
JrWRKY73	Jre-miR172a	0.0285689	directed
JrWRKY73	Jre-miR172b	0.0344749	directed
JrWRKY73	Jre-miR172c	0.0560374	directed
JrWRKY73	Jre-miR172d	0.0243982	directed
JrWRKY73	Jre-miR172e	0.049168	directed
JrWRKY73	Jre-miR172f	0.0339005	directed
JrWRKY73	Jre-miR2111a	0.0228303	directed
JrWRKY73	Jre-miR2111b	0.0544611	directed
JrWRKY73	Jre-miR394a	0.0437477	directed
JrWRKY73	Jre-miR394b	0.0455793	directed
JrWRKY73	Jre-miR394c	0.0209847	directed
JrWRKY73	Jre-miR394d	0.0332988	directed
JrWRKY73	Jre-miR396a	0.0319132	directed
JrWRKY73	Jre-miR396b	0.023773	directed
JrWRKY73	Jre-miR396c	0.0436321	directed
JrWRKY73	Jre-miR396d	0.0238496	directed
JrWRKY73	Jre-miR396e	0.0366341	directed
JrWRKY73	Jre-miR396f	0.0348185	directed
JrWRKY73	Jre-miR472a	0.0241128	directed
JrWRKY73	Jre-miR472b	0.0380912	directed
JrWRKY73	Jre-miR482a	0.0229844	directed
JrWRKY73	Jre-miR482b	0.0351018	directed
JrWRKY73	Jre-miR482c	0.0634237	directed
JrWRKY73	Jre-miR482d	0.0291211	directed
JrWRKY73	Jre-miRN5866	0.0200672	directed
JrWRKY73	Jre-miRN5867	0.0366993	directed
JrWRKY73	Jre-miRN5869	0.0500243	directed
JrWRKY73	Jre-miRN5870	0.0229161	directed
JrWRKY73	Jre-miRN5871	0.0815549	directed
JrWRKY73	Jre-miRN5872	0.0208256	directed
JrWRKY73	Jre-miRN5873	0.0311299	directed
JrWRKY73	Jre-miRN5874	0.0377997	directed
JrWRKY73	Jre-miRN5875	0.0387255	directed
JrWRKY73	Jre-miRN5876	0.0242369	directed
JrWRKY73	Jre-miRN5885	0.0349135	directed
JrWRKY73	Jre-miRN5886	0.0877129	directed
JrWRKY73	Jre-miRN5888	0.0275549	directed
JrWRKY73	Jre-miRN5891	0.0241811	directed
JrWRKY73	Jre-miRN5900	0.0219127	directed
JrWRKY73	Jre-miRN5901	0.0289683	directed
JrWRKY73	Jre-miRN5904	0.0245925	directed
JrWRKY73	Jre-miRN5905	0.0299337	directed
JrWRKY73	Jre-miRN5906	0.0282694	directed
JrWRKY73	Jre-miRN5908	0.0232159	directed
JrWRKY73	Jre-miRN5909	0.0392736	directed
JrWRKY73	Jre-miRN5910	0.0440112	directed
JrWRKY73	Jre-miRN5912	0.0455983	directed
JrWRKY73	Jre-miRN745a	0.0290745	directed
JrWRKY73	Jre-miRN745b	0.0354938	directed
JrWRKY73	Jre-miRN745c	0.0252188	directed
