# Supplementary material for: Genome-Wide Identification and Transcriptional Expression Profiles of Transcription Factor WRKY in Common Walnut (Juglans regia L.)
Source: Genes (Basel). 2021 Sep 19;12(9):1444. doi: 10.3390/genes12091444 (PMC8466090; doi:10.3390/genes12091444)
Supplement: Supplementary file 1 [file genes-12-01444-s001.zip › TableS16.xlsx]

## Sheet: Sheet1
TableS16. One-to-one orthologous relationships between Juglans regia and Arabidopsis thaliana.
Wanut protein ID	Orthologous Arabidopsis ID	Identity	Score	Gene name
Jr01_03140_p1	NP_178433.1	52.14	436	JrWRKY1
Jr01_03150_p1	NP_178433.1	49.78	340	JrWRKY2
Jr01_03780_p1	NP_192845.1	44.55	88.2	JrWRKY3
Jr01_06810_p1	NP_196812.1	82.61	169	JrWRKY4
Jr01_15550_p1	NP_195651.1	49.19	192	JrWRKY5
Jr01_15790_p1	NP_568995.2	51.7	161	JrWRKY6
Jr01_15800_p1	NP_568995.2	51.41	161	JrWRKY7
Jr01_18750_p1	NP_192354.1	50.75	413	JrWRKY8
Jr01_22930_p1	NP_193551.1	49.8	199	JrWRKY9
Jr02_00640_p1	NP_196812.1	74.73	150	JrWRKY10
Jr02_04990_p1	NP_197017.1	40.77	286	JrWRKY11
Jr02_16420_p1	NP_192845.1	36.91	213	JrWRKY12
Jr02_17180_p1	NP_194086.4	42.57	184	JrWRKY13
Jr02_17190_p1	NP_194086.4	41.56	184	JrWRKY14
Jr02_25510_p1	NP_849450.1	56.01	567	JrWRKY15
Jr02_25520_p1	NP_567752.1	53.86	501	JrWRKY16
Jr02_26760_p1	NP_200438.1	51.63	610	JrWRKY17
Jr03_08810_p1	NP_174222.2	60.41	272	JrWRKY18
Jr03_11540_p1	NP_564792.1	51.95	477	JrWRKY19
Jr03_15160_p1	NP_193551.1	48.7	242	JrWRKY20
Jr03_17800_p1	NP_564359.1	44.54	311	JrWRKY21
Jr03_22520_p1	NP_181263.2	47.65	358	JrWRKY22
Jr03_23890_p1	NP_199143.1	37.76	172	JrWRKY23
Jr03_26460_p1	NP_181381.2	46.97	365	JrWRKY24
Jr03_27180_p1	NP_191199.1	41.05	150	JrWRKY25
Jr04_00630_p1	NP_191199.1	41.36	147	JrWRKY26
Jr04_00640_p1	NP_191199.1	46.96	109	JrWRKY27
Jr04_01100_p1	NP_181381.2	48.18	365	JrWRKY28
Jr04_02750_p1	NP_199143.1	39.55	166	JrWRKY29
Jr04_03880_p1	NP_181263.2	46.37	347	JrWRKY30
Jr04_10710_p1	NP_193551.1	46.99	213	JrWRKY31
Jr04_13770_p1	NP_564792.1	53.39	482	JrWRKY32
Jr04_15560_p1	NP_174222.2	58.26	252	JrWRKY33
Jr04_15570_p1	NP_174222.2	58.68	258	JrWRKY34
Jr05_06670_p1	NP_180584.1	43.95	302	JrWRKY35
Jr06_10190_p1	NP_197989.2	87.5	142	JrWRKY36
Jr06_10200_p1	NP_197989.2	50	146	JrWRKY37
Jr07_07490_p1	NP_192034.1	50	253	JrWRKY38
Jr07_07550_p1	NP_182136.2	78.57	171	JrWRKY39
Jr07_08410_p1	NP_194112.1	42.21	188	JrWRKY40
Jr07_11780_p1	NP_199763.1	55.77	199	JrWRKY41
Jr07_12950_p1	NP_001328851.1	39.55	229	JrWRKY42
Jr07_32310_p1	NP_178199.1	61.07	313	JrWRKY43
Jr07_38970_p1	NP_181606.1	36.63	201	JrWRKY44
Jr07_38980_p1	NP_191199.1	50.5	177	JrWRKY45
Jr07_38990_p1	NP_191199.1	50.75	181	JrWRKY46
Jr08_00860_p1	NP_001320110.1	42.93	132	JrWRKY47
Jr08_00870_p1	NP_567882.1	46.61	248	JrWRKY48
Jr08_00880_p1	NP_567882.1	49.3	237	JrWRKY49
Jr08_00890_p1	NP_567882.1	49.3	237	JrWRKY50
Jr08_11260_p1	NP_182248.1	50.32	226	JrWRKY51
Jr08_11410_p1	NP_001324223.1	65.63	132	JrWRKY52
Jr08_14560_p1	NP_200438.1	35.75	171	JrWRKY53
Jr08_14570_p1	NP_200438.1	43.02	331	JrWRKY54
Jr09_02120_p1	NP_197017.1	38.59	268	JrWRKY55
Jr09_09980_p1	NP_192845.1	39.94	230	JrWRKY56
Jr09_10570_p1	NP_198972.1	65.85	174	JrWRKY57
Jr09_10580_p1	NP_194086.4	42.06	191	JrWRKY58
Jr09_16000_p1	NP_849450.1	57.22	585	JrWRKY59
Jr09_16010_p1	NP_849450.1	57.31	590	JrWRKY60
Jr10_01810_p1	NP_178433.1	53.75	459	JrWRKY61
Jr10_02340_p1	NP_197017.1	44.08	317	JrWRKY62
Jr10_04760_p1	NP_196812.1	94.44	79.3	JrWRKY63
Jr10_04770_p1	NP_196812.1	86.21	163	JrWRKY64
Jr10_04790_p1	NP_196812.1	94.44	79.3	JrWRKY65
Jr10_10930_p1	NP_195651.1	54.09	202	JrWRKY66
Jr10_11120_p1	NP_568995.2	45.95	149	JrWRKY67
Jr10_11130_p1	NP_568995.2	45.45	145	JrWRKY68
Jr10_13870_p1	NP_192354.1	45.29	407	JrWRKY69
Jr10_25600_p1	NP_178565.1	48.38	285	JrWRKY70
Jr11_16130_p1	NP_174222.2	52.48	129	JrWRKY71
Jr11_16150_p1	NP_174222.2	51.8	131	JrWRKY72
Jr11_16330_p1	NP_182248.1	47.45	219	JrWRKY73
Jr11_17180_p1	NP_192081.1	44.32	309	JrWRKY74
Jr11_17190_p1	NP_192081.1	44.1	307	JrWRKY75
Jr11_30170_p1	NP_567882.1	48.21	250	JrWRKY76
Jr11_30180_p1	NP_178199.1	41.23	148	JrWRKY77
Jr12_04410_p1	NP_192034.1	47.98	251	JrWRKY78
Jr12_04430_p1	NP_198972.1	64.71	169	JrWRKY79
Jr12_10150_p1	NP_199763.1	46.85	207	JrWRKY80
Jr12_20670_p1	NP_178199.1	53.15	299	JrWRKY81
Jr12_25170_p1	NP_181606.1	38.52	201	JrWRKY82
Jr13_05050_p1	NP_176982.1	50.67	254	JrWRKY83
Jr13_12290_p1	NP_196812.1	89.13	182	JrWRKY84
Jr13_14610_p1	NP_974112.1	51.07	234	JrWRKY85
Jr13_14850_p1	NP_172849.1	60.51	558	JrWRKY86
Jr13_16070_p1	NP_197017.1	39.39	269	JrWRKY87
Jr13_30130_p1	NP_568439.1	42.8	172	JrWRKY88
Jr13_30630_p1	NP_568777.1	63.52	198	JrWRKY89
Jr14_02960_p1	NP_566025.2	56.17	216	JrWRKY90
Jr14_08090_p1	NP_181381.2	56.79	336	JrWRKY91
Jr14_08100_p1	NP_181381.2	47.13	348	JrWRKY92
Jr14_22100_p1	NP_199143.1	47.37	64.7	JrWRKY93
Jr15_12650_p1	NP_567862.3	54.68	407	JrWRKY94
Jr15_12660_p1	NP_567862.3	61.18	398	JrWRKY95
Jr15_12670_p1	NP_567862.3	54.68	407	JrWRKY96
Jr16_00890_p1	NP_194112.1	42.56	199	JrWRKY97
Jr16_12390_p1	NP_172849.1	56.34	494	JrWRKY98
Jr16_12590_p1	NP_974112.1	52.04	193	JrWRKY99
Jr16_14290_p1	NP_196812.1	85.87	178	JrWRKY100
Jr16_19690_p1	NP_176982.1	48.23	246	JrWRKY101
